# Supplementary material
Source: PubMed Central journal article supplement (PMC3130739)

**Orthogonal Cu- and Pd-Based Catalyst Systems for the O- and N-Arylation of Aminophenols**

Debabrata Maiti and Stephen L. Buchwald\*

Department of Chemistry, Massachusetts Institute of Technology, 77 Massachusetts Avenue, Cambridge Massachusetts 02139

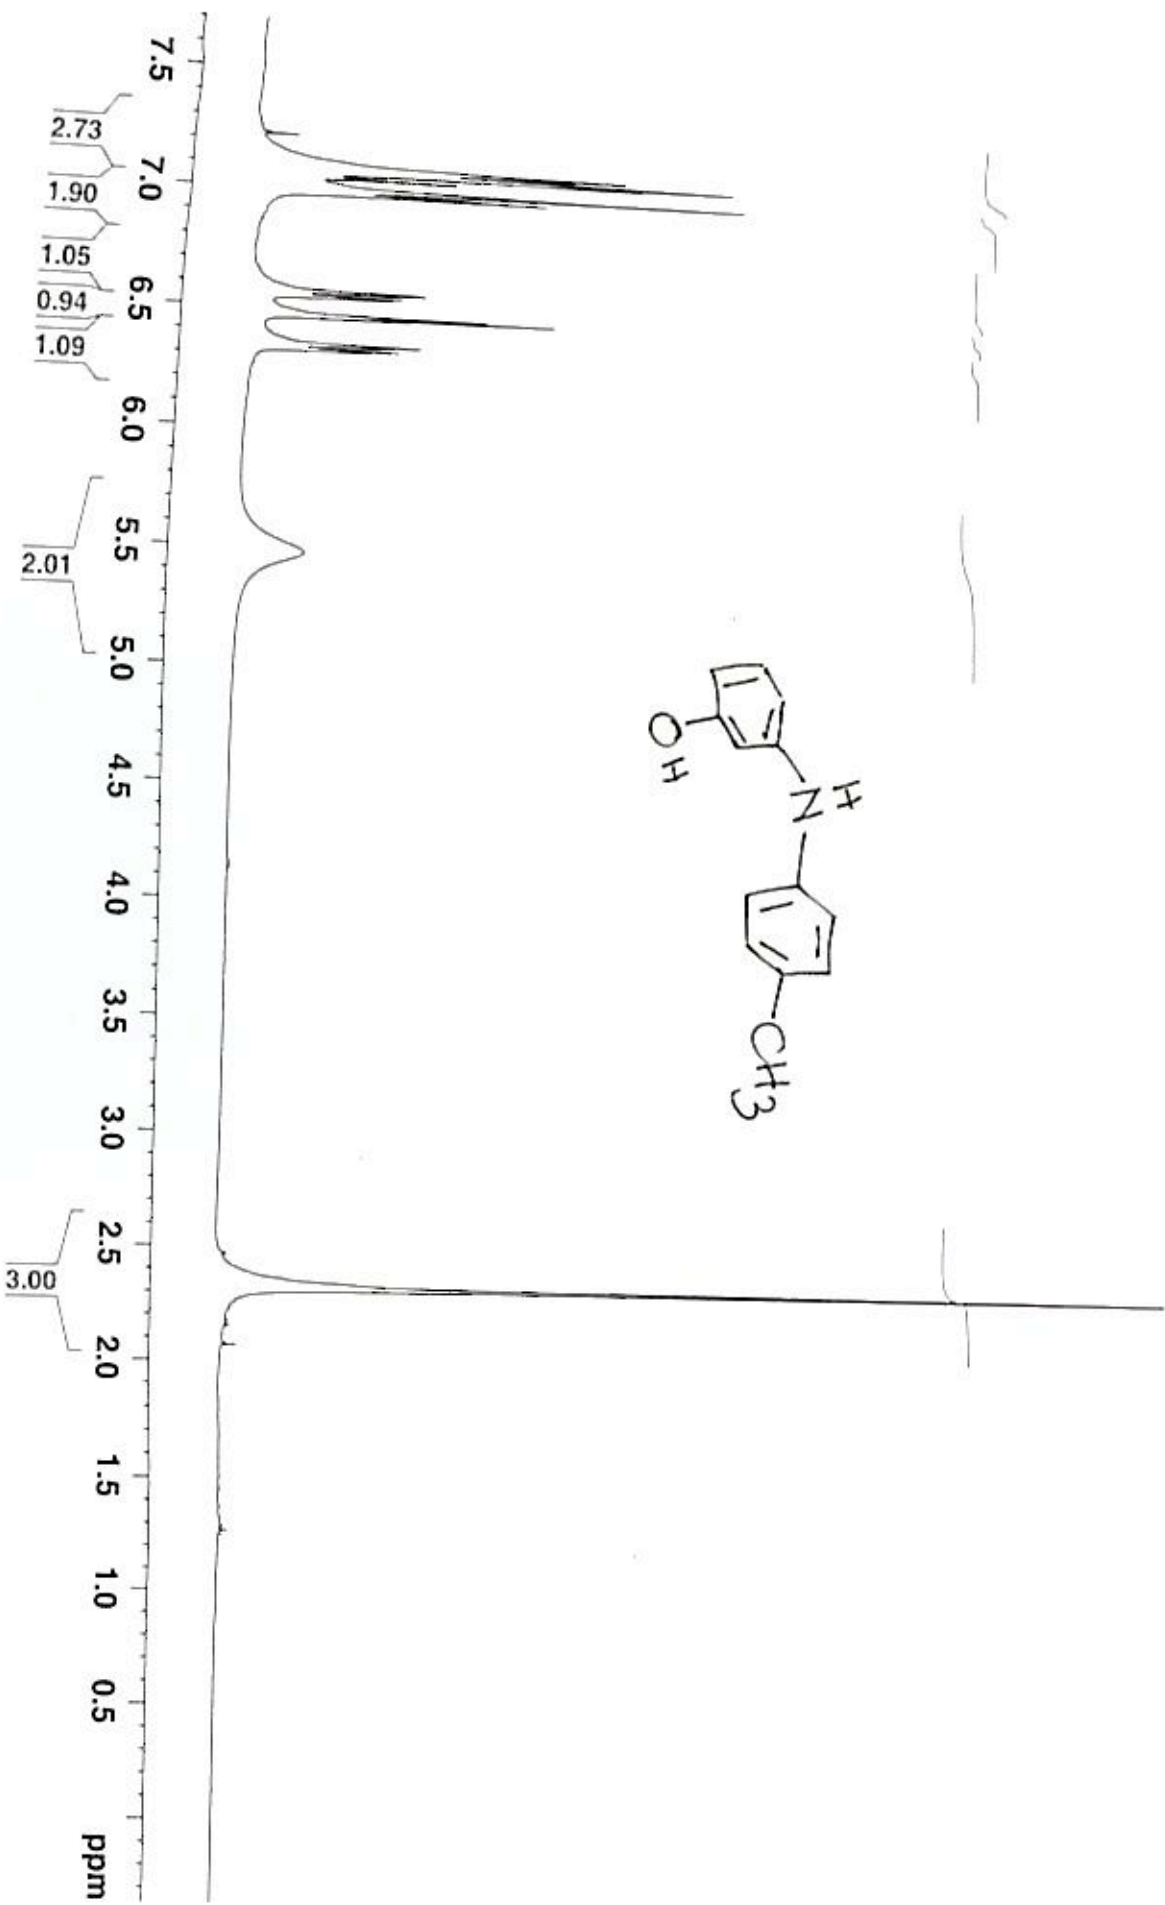

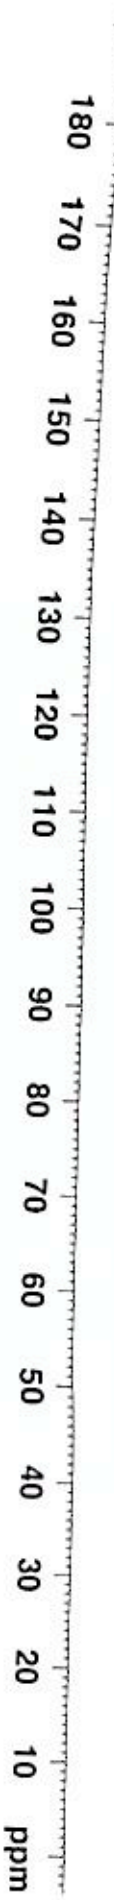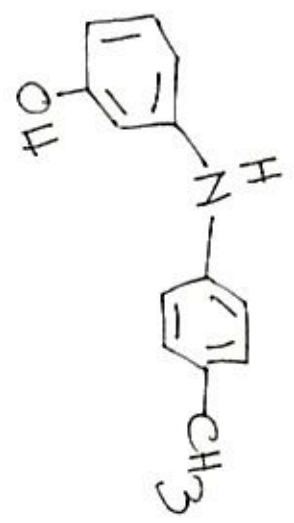

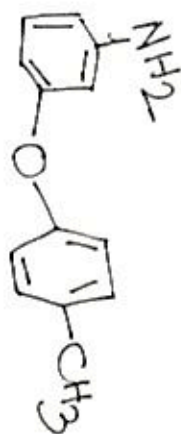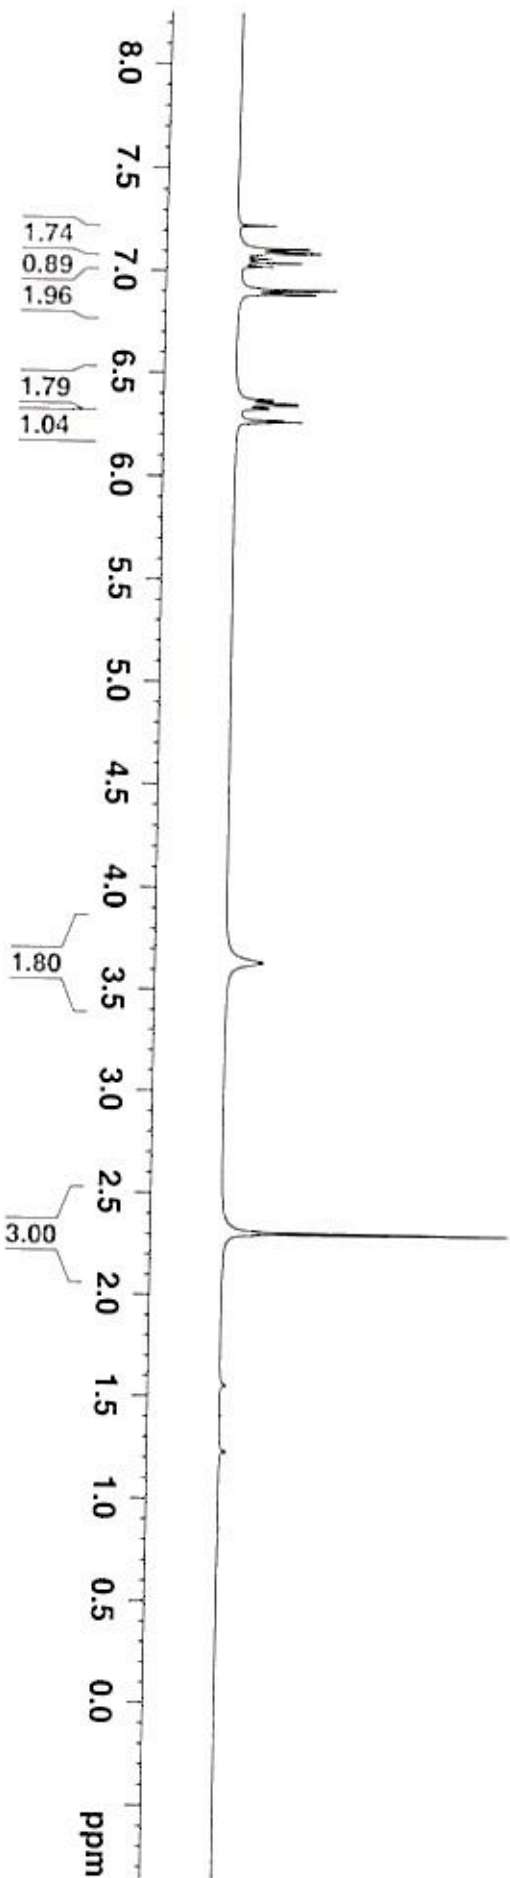



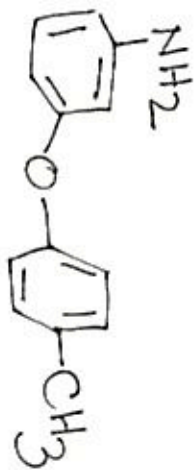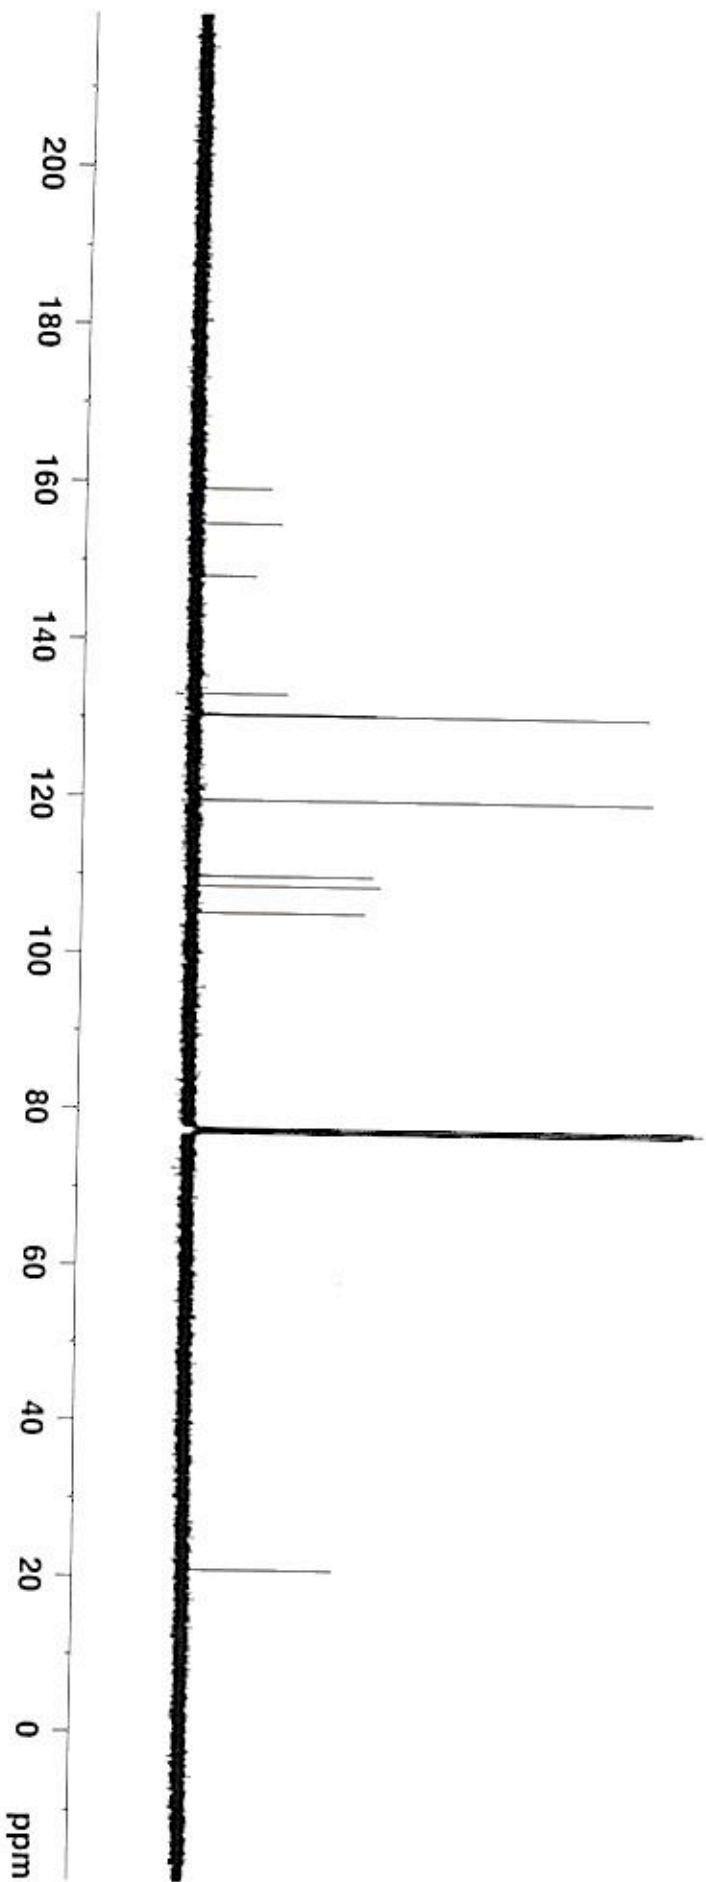

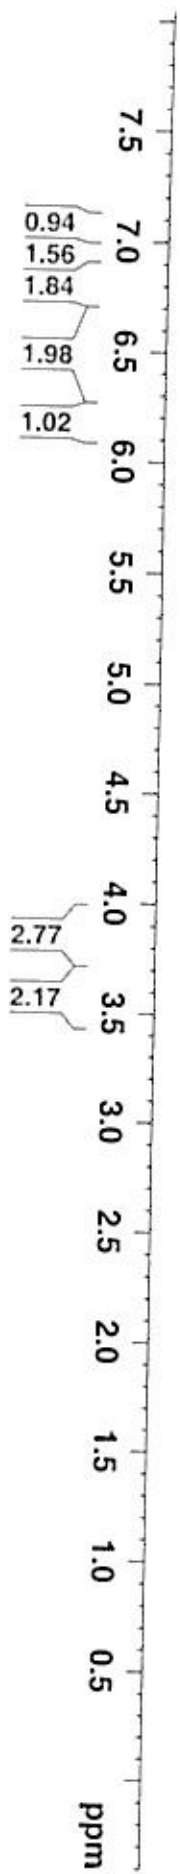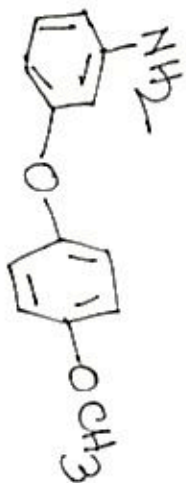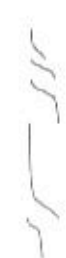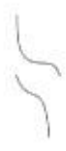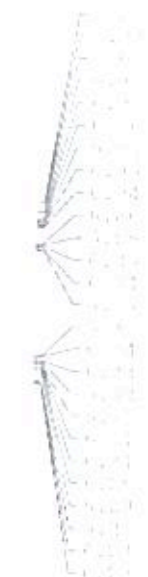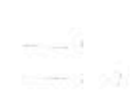

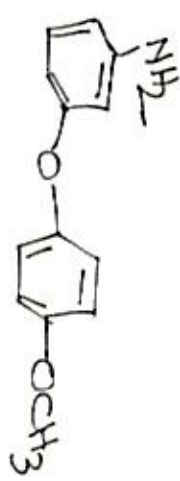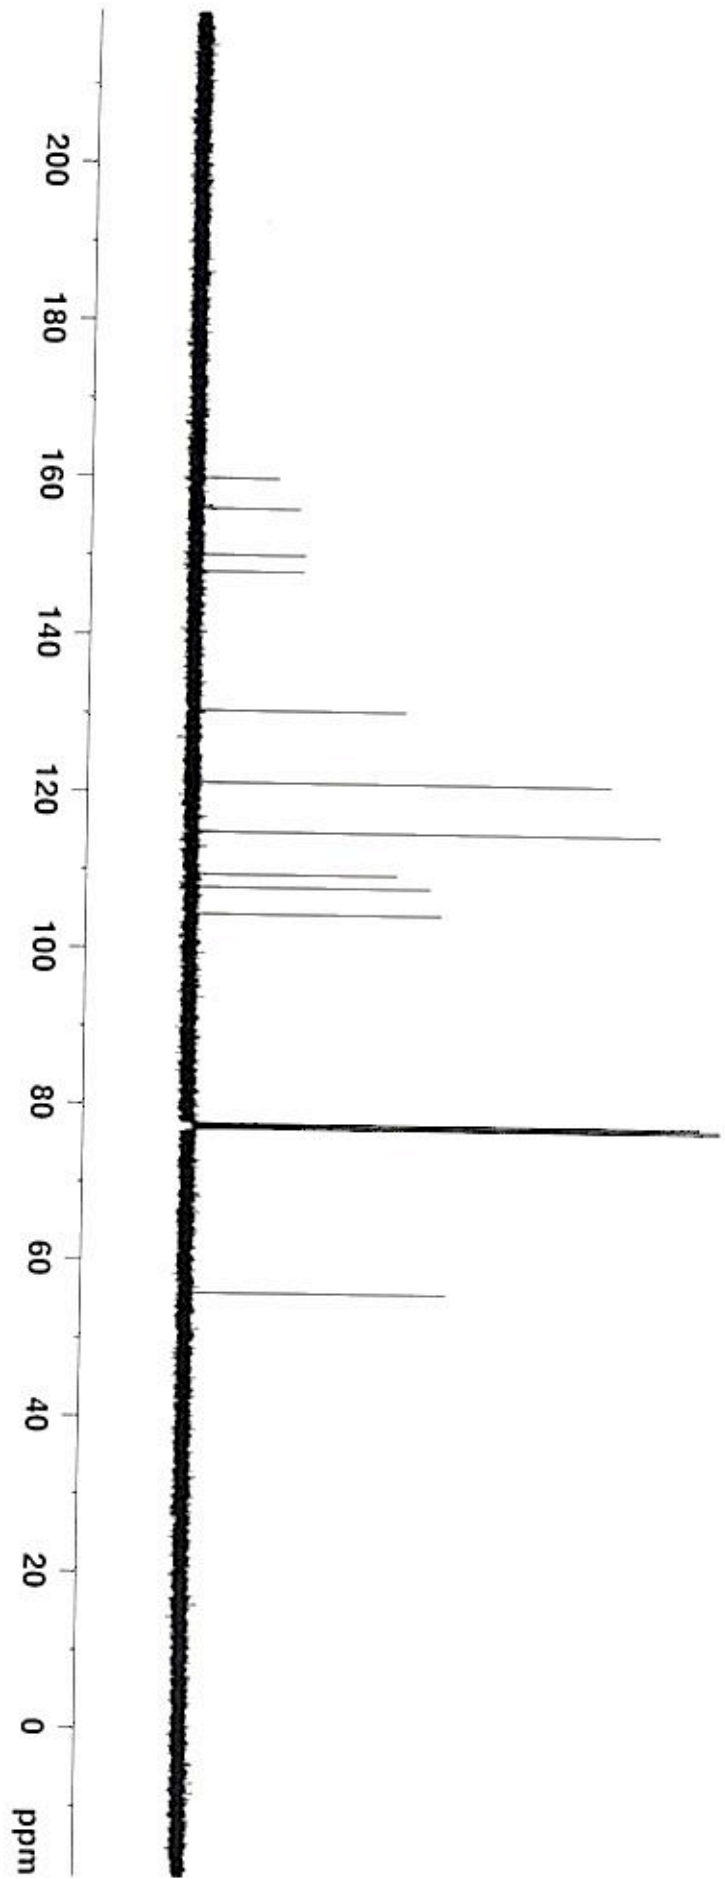

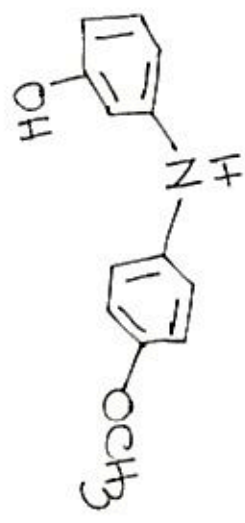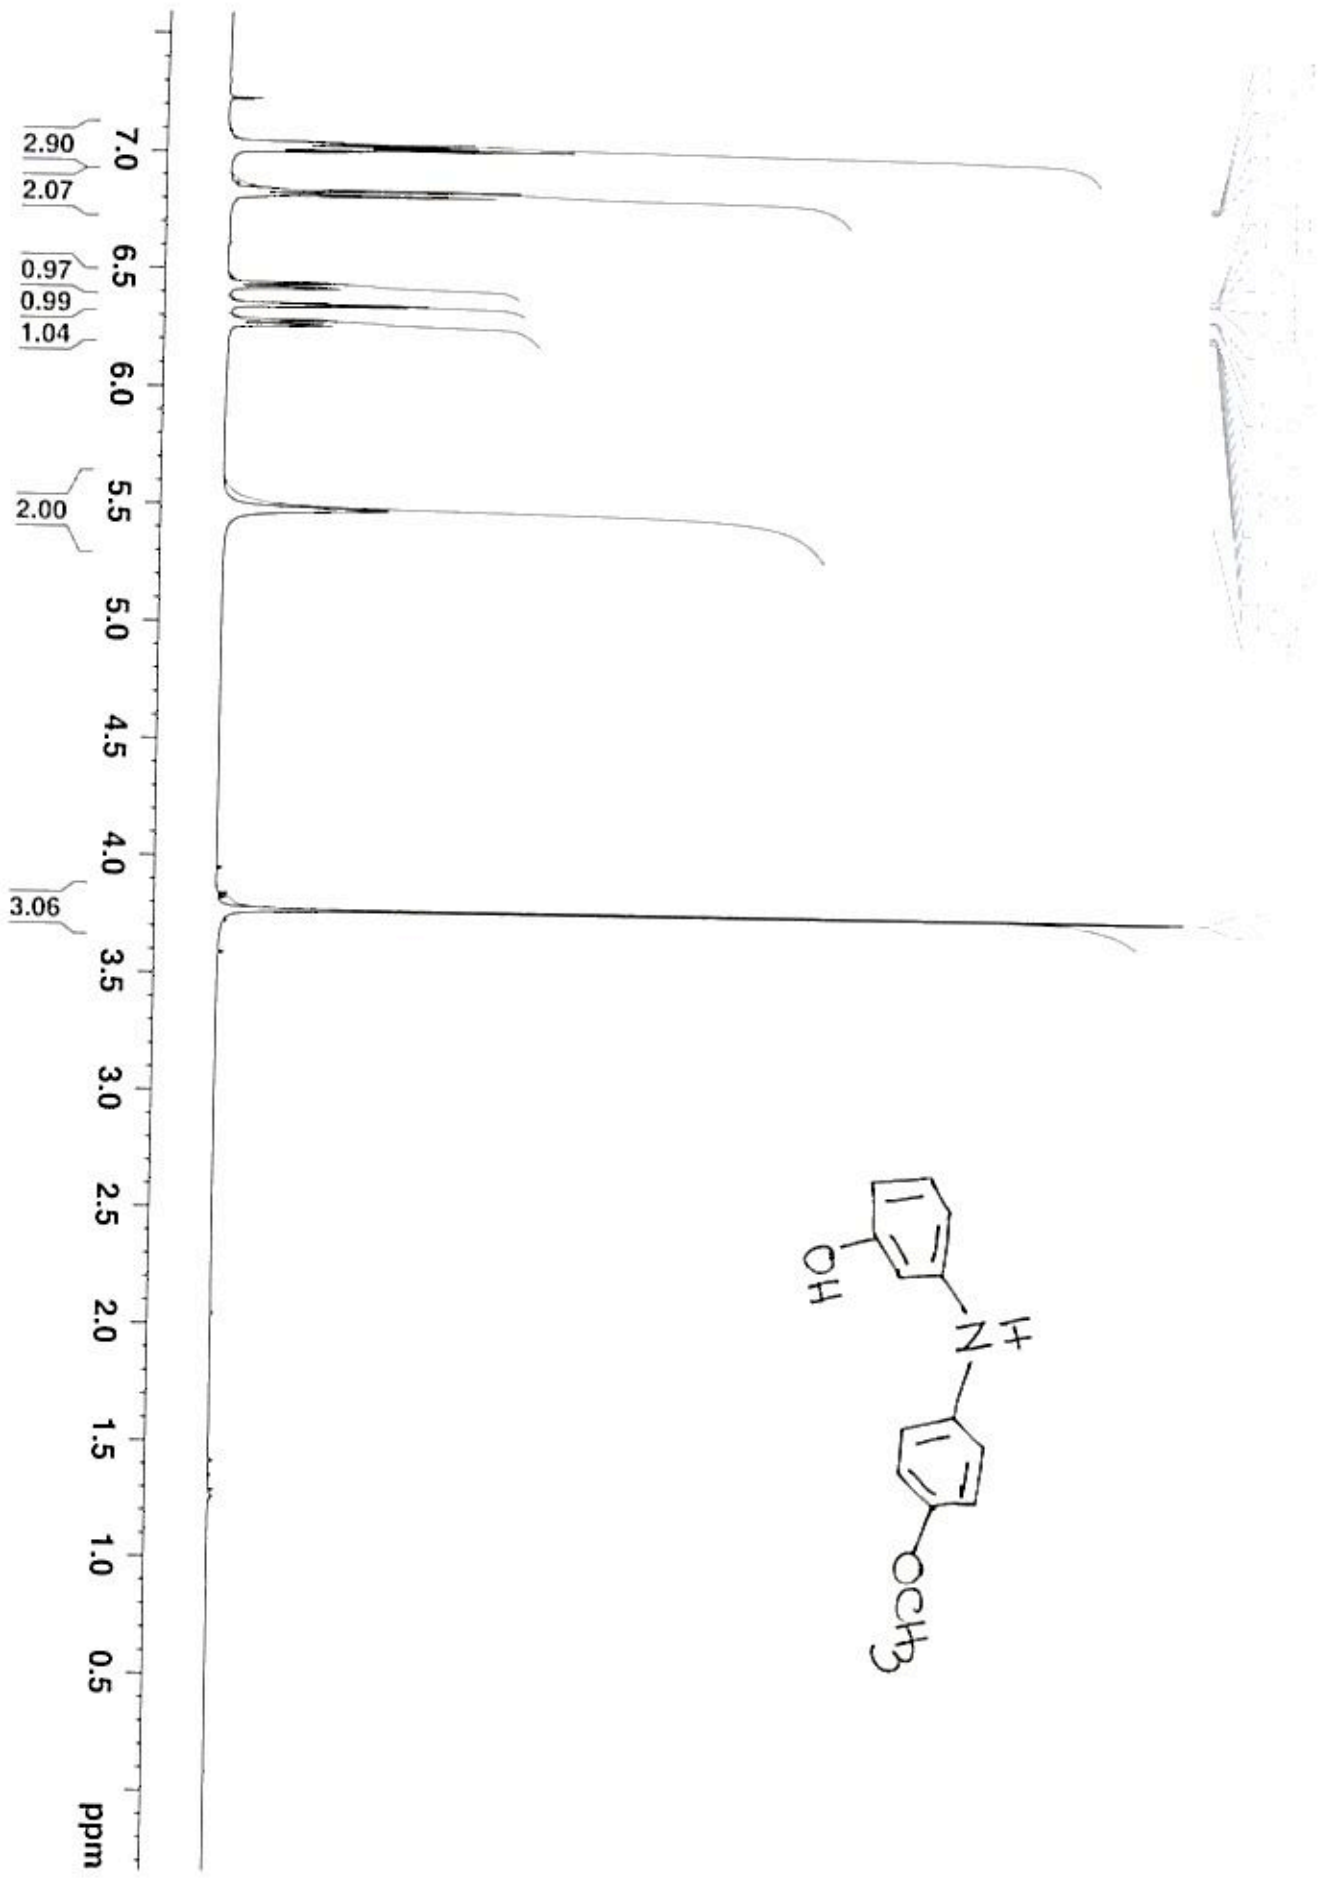

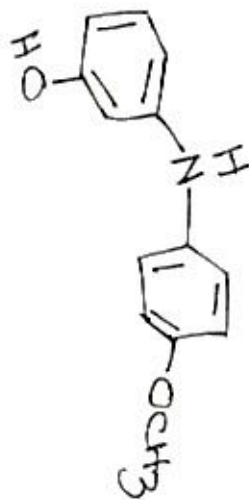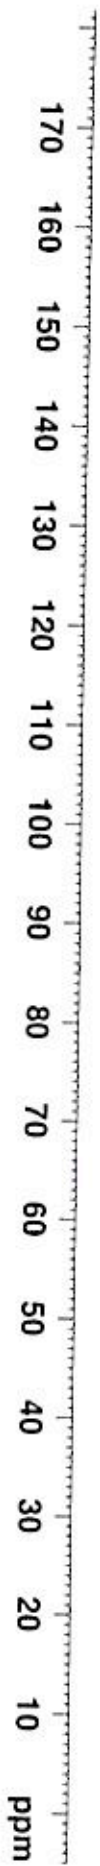

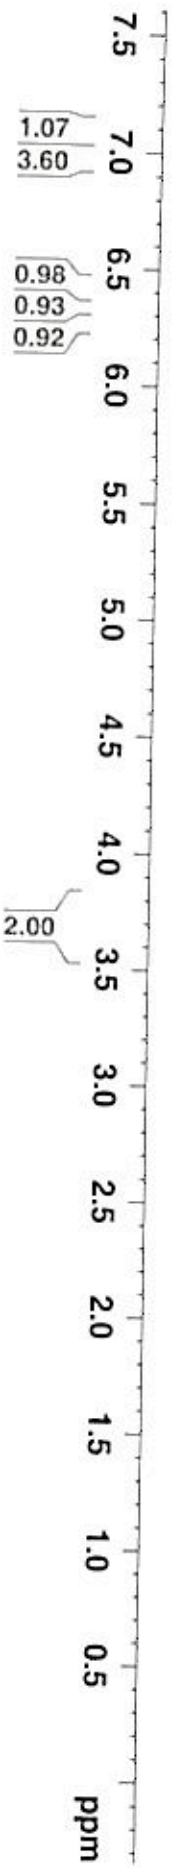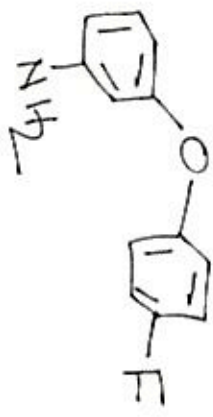

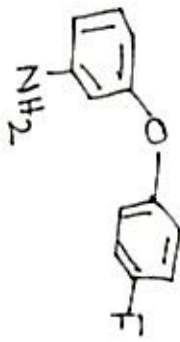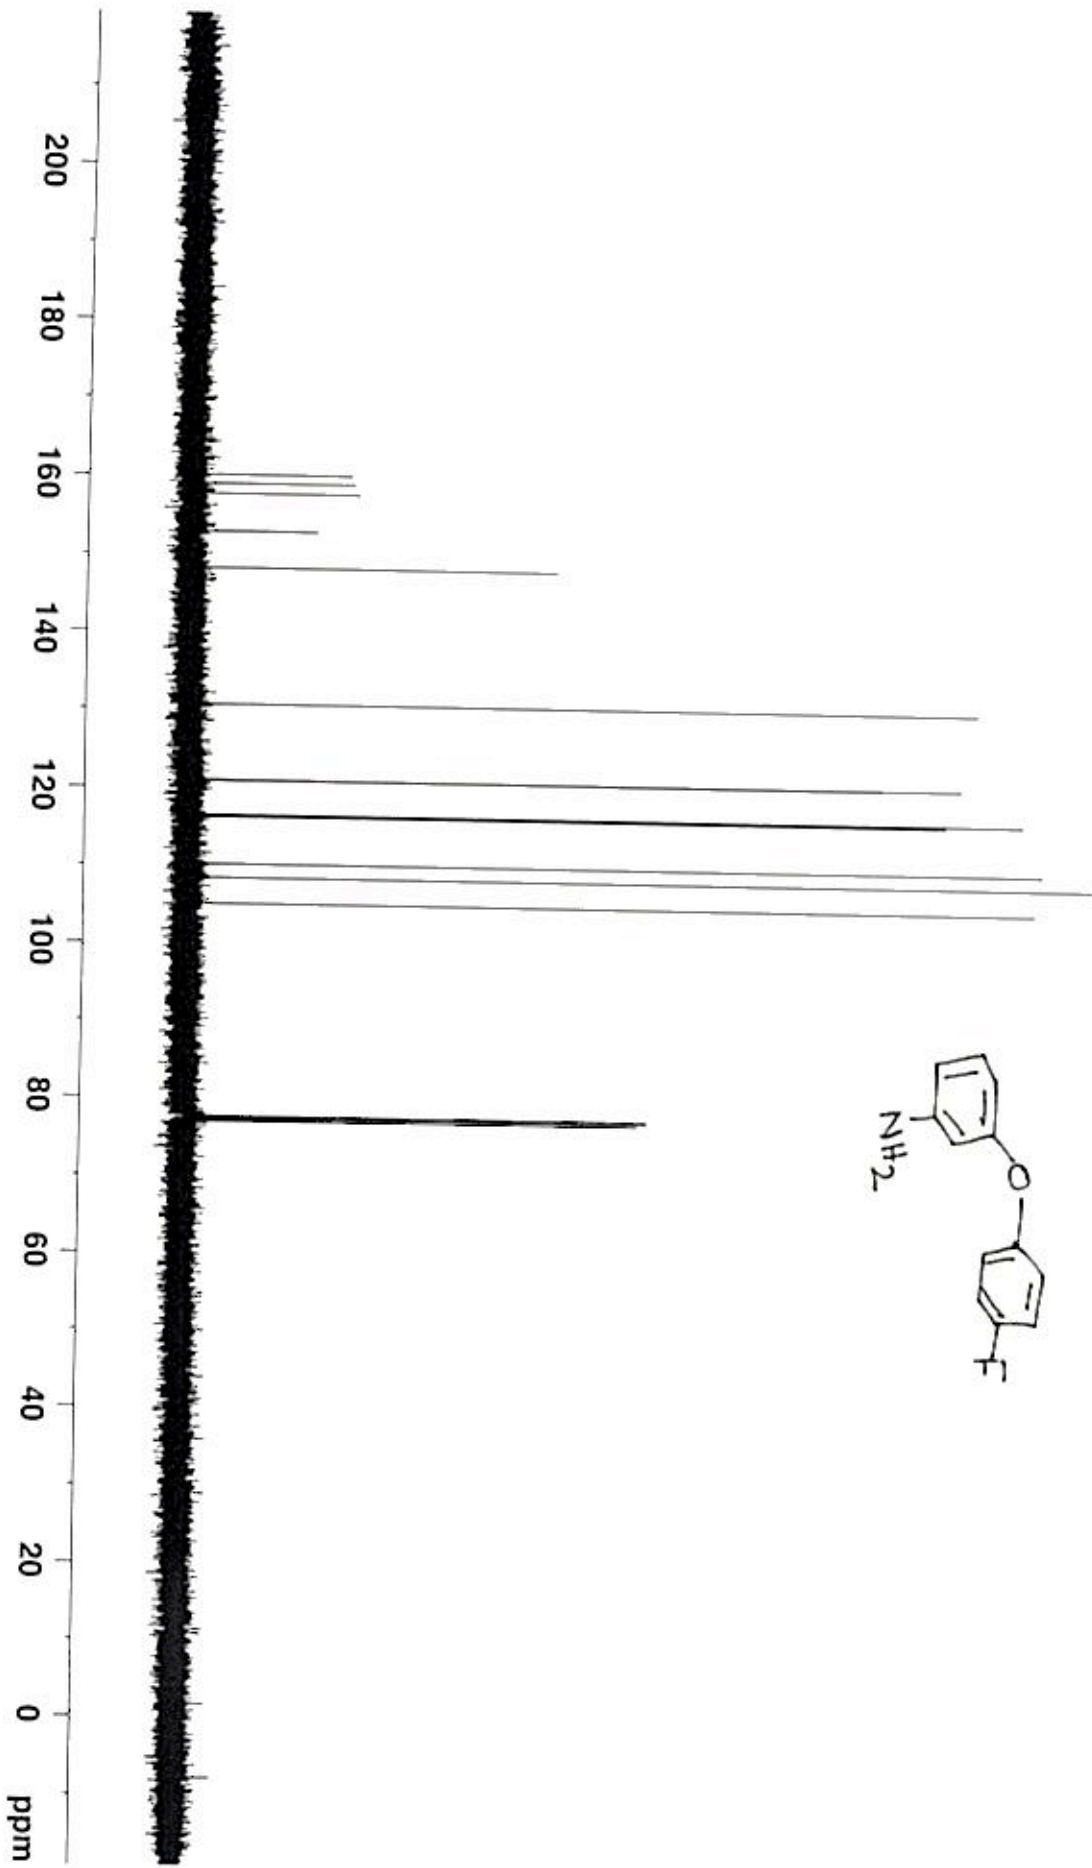

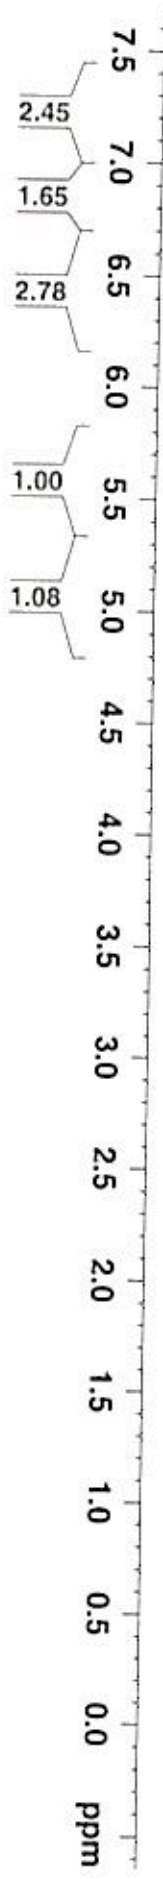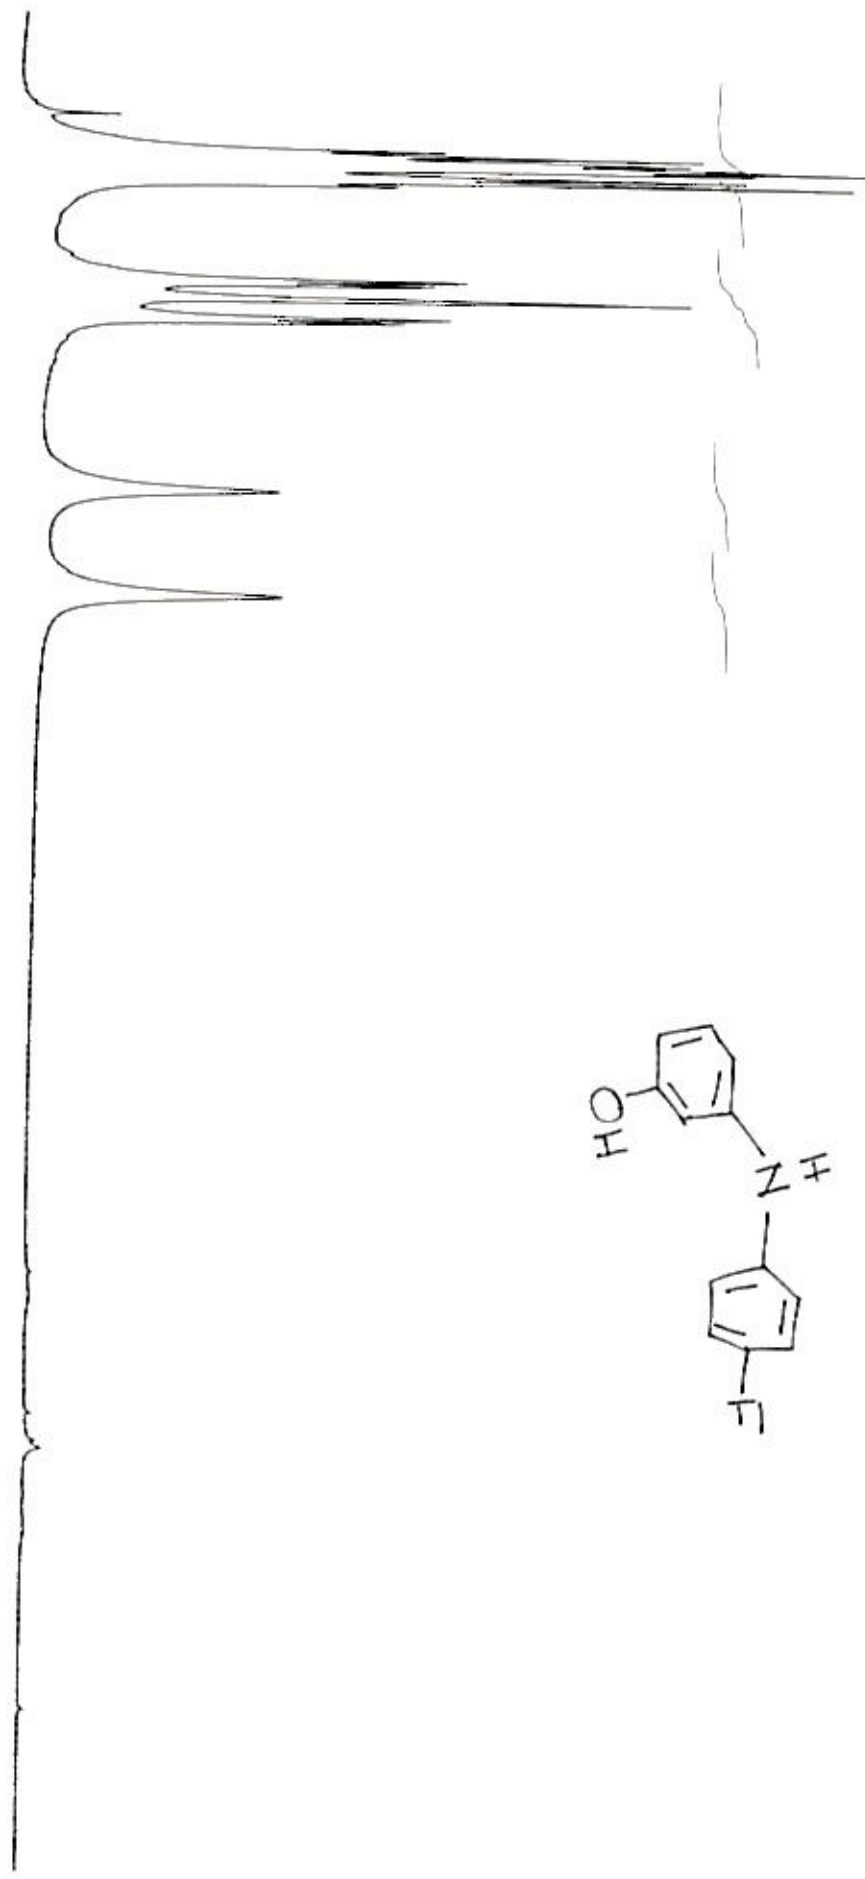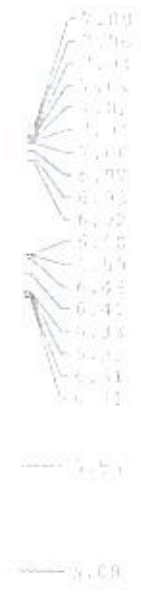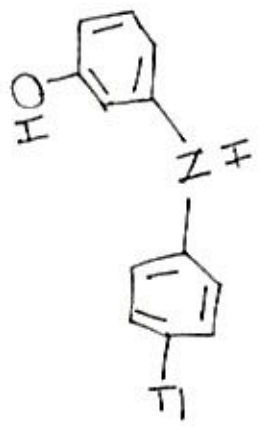



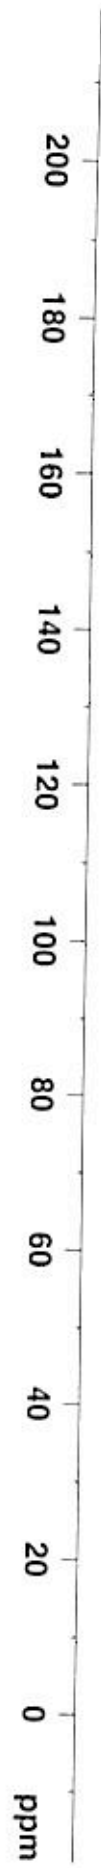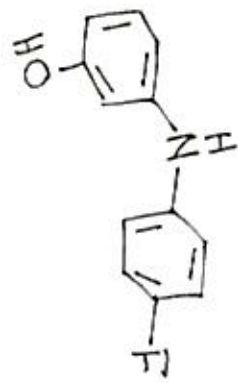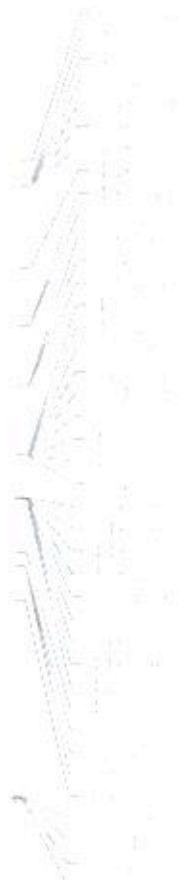

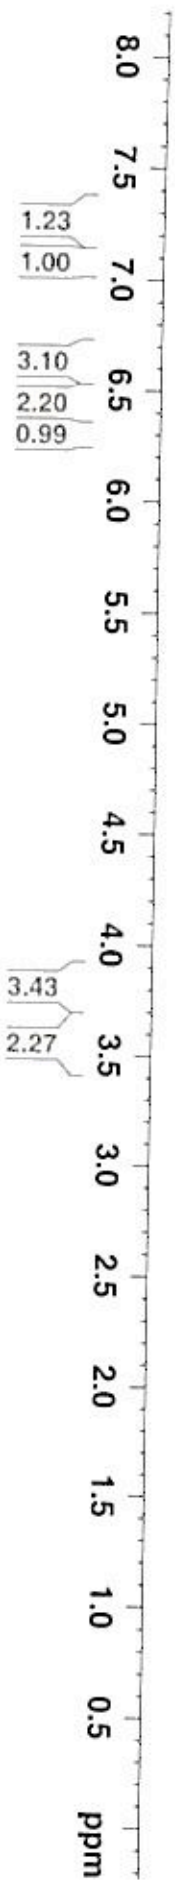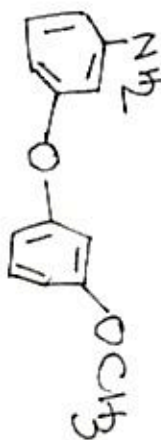

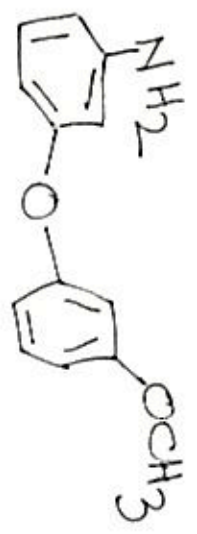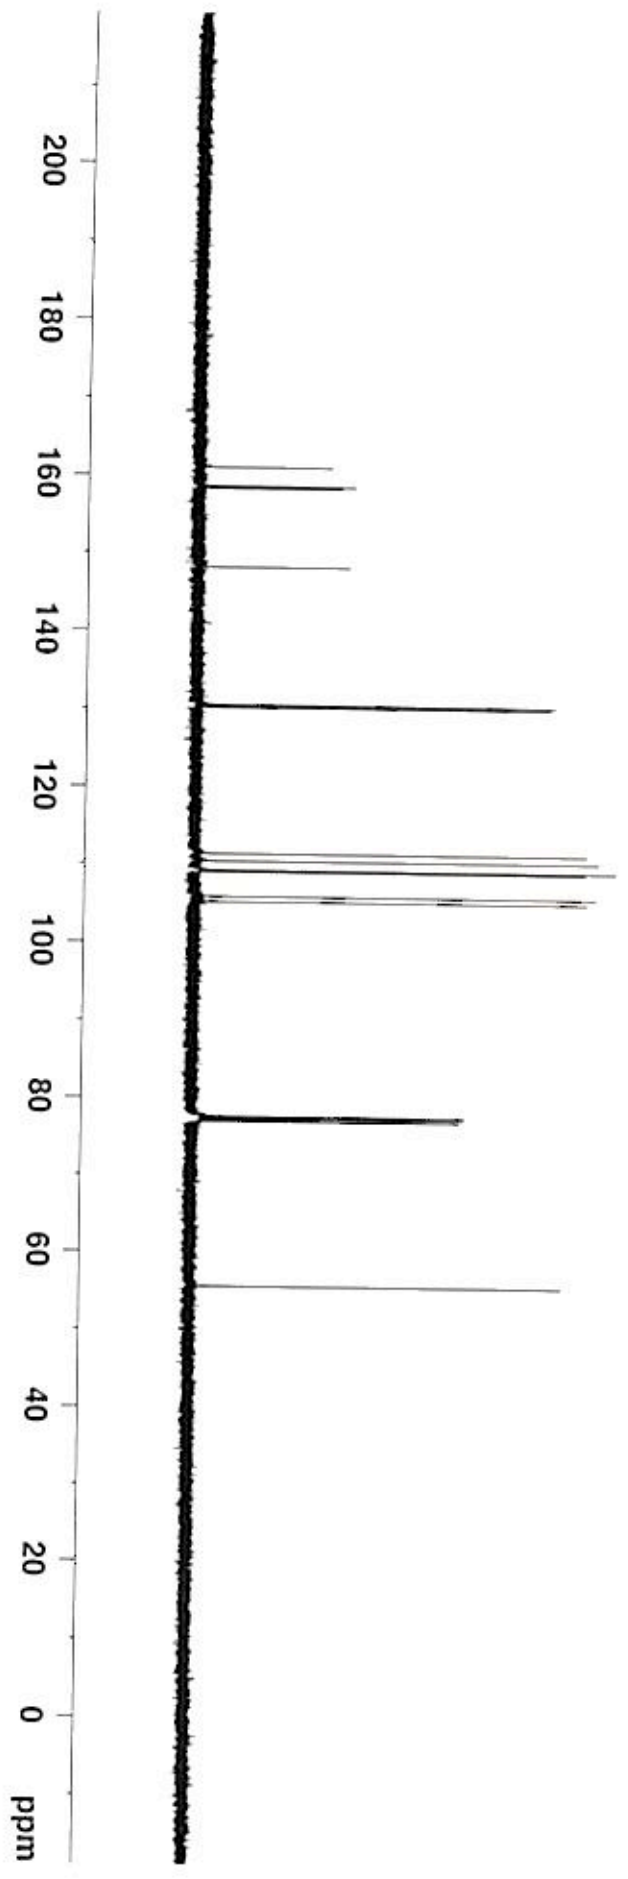

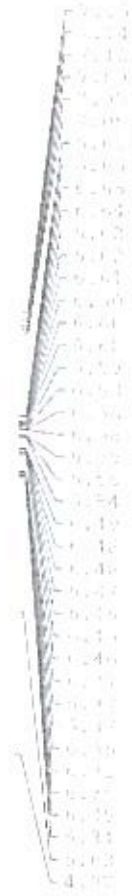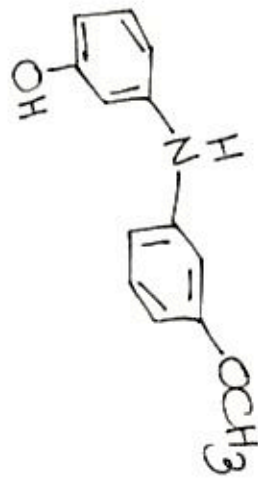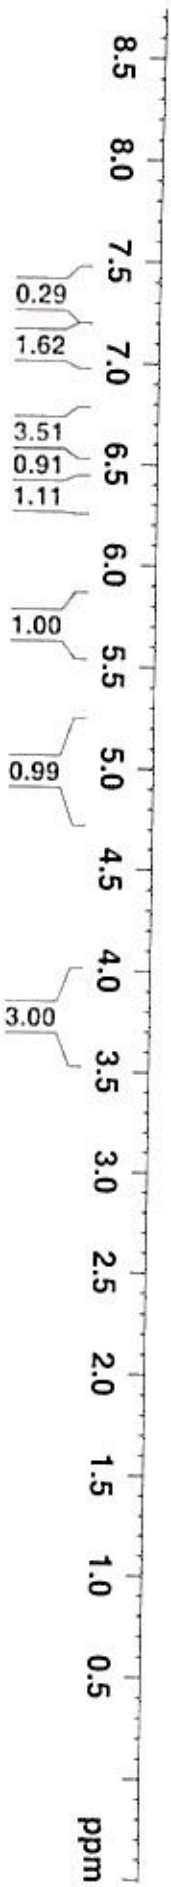

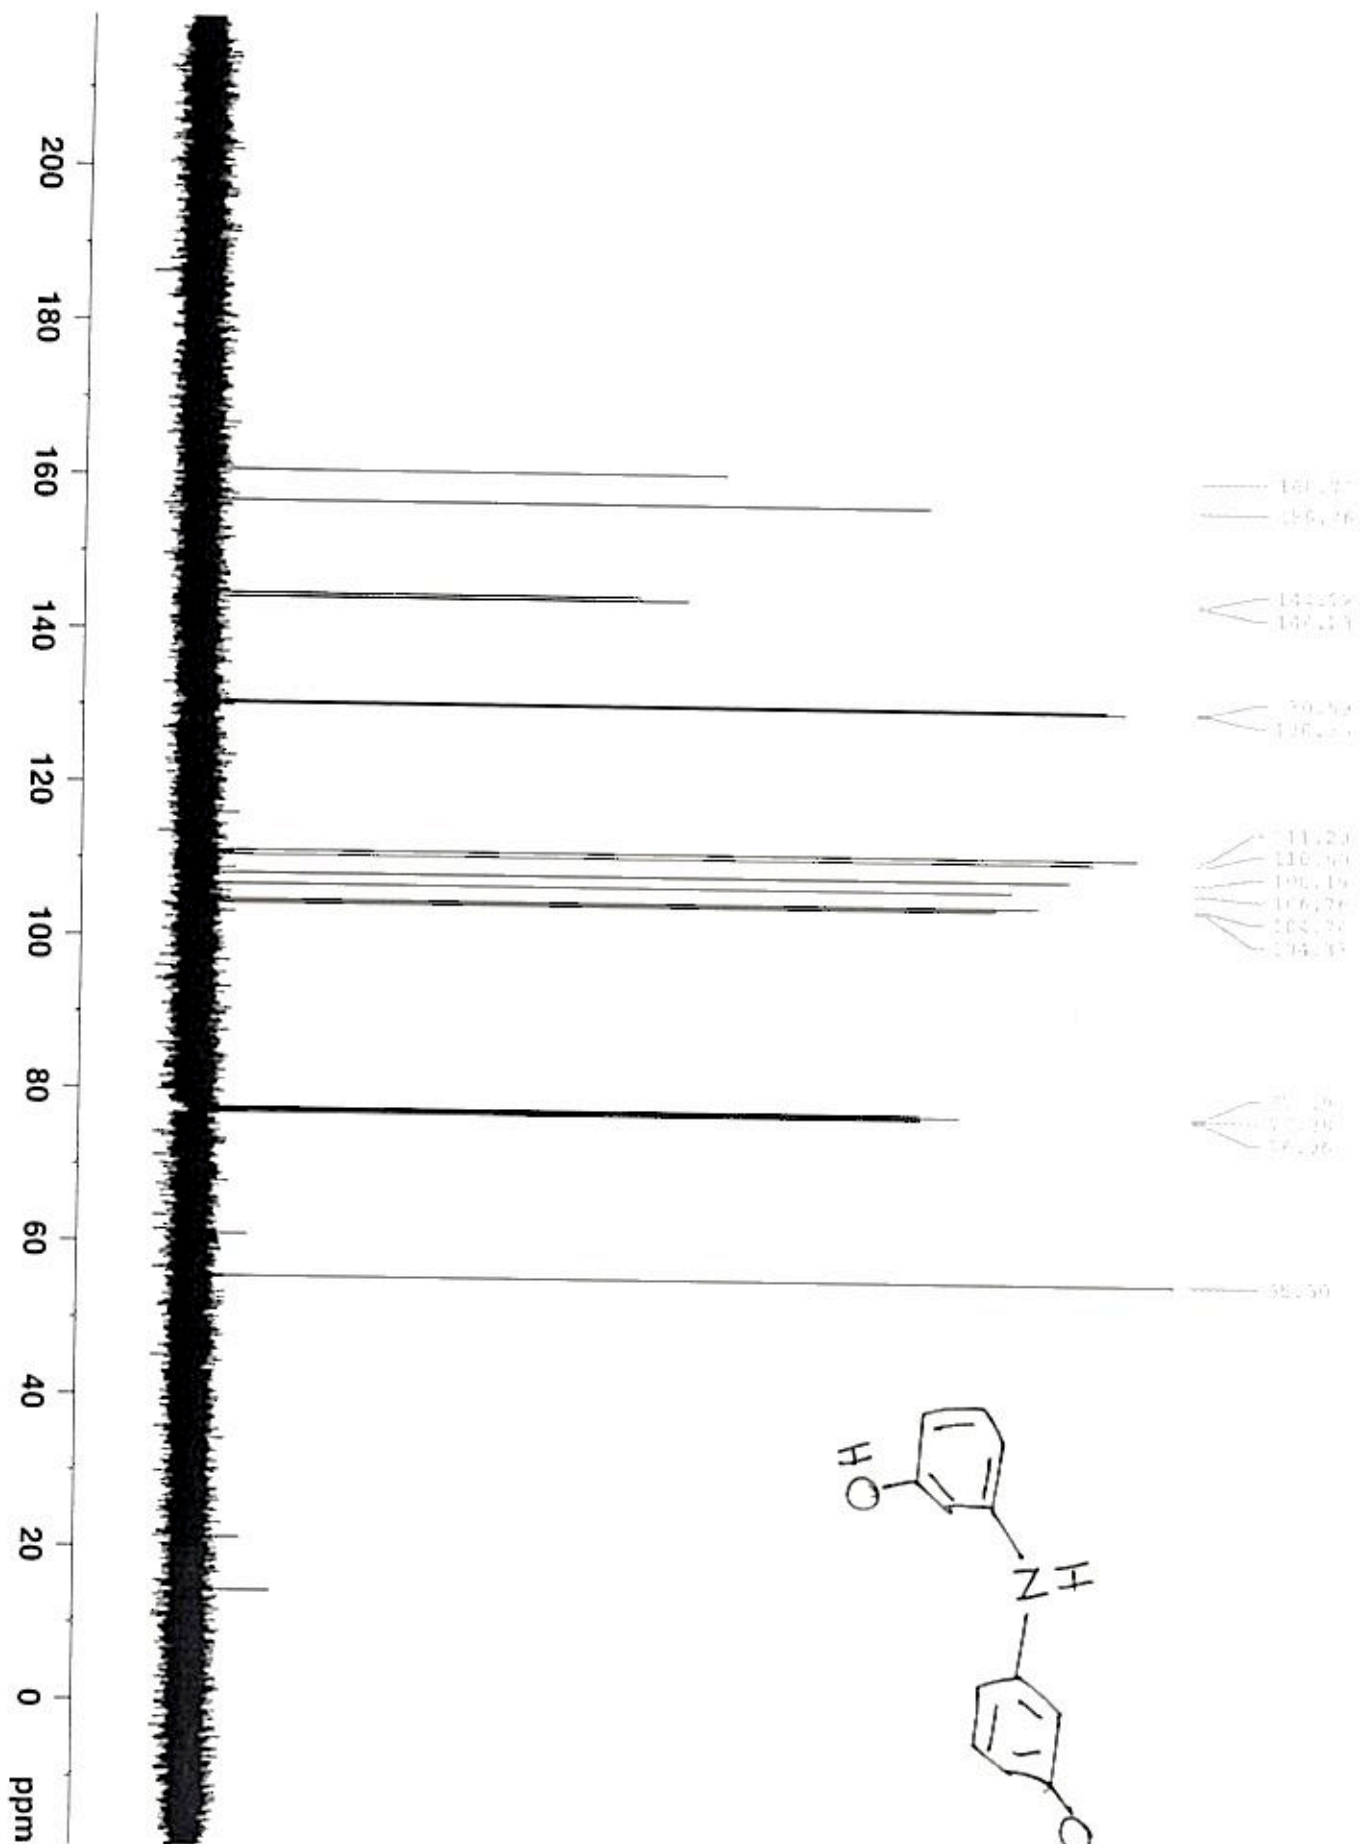

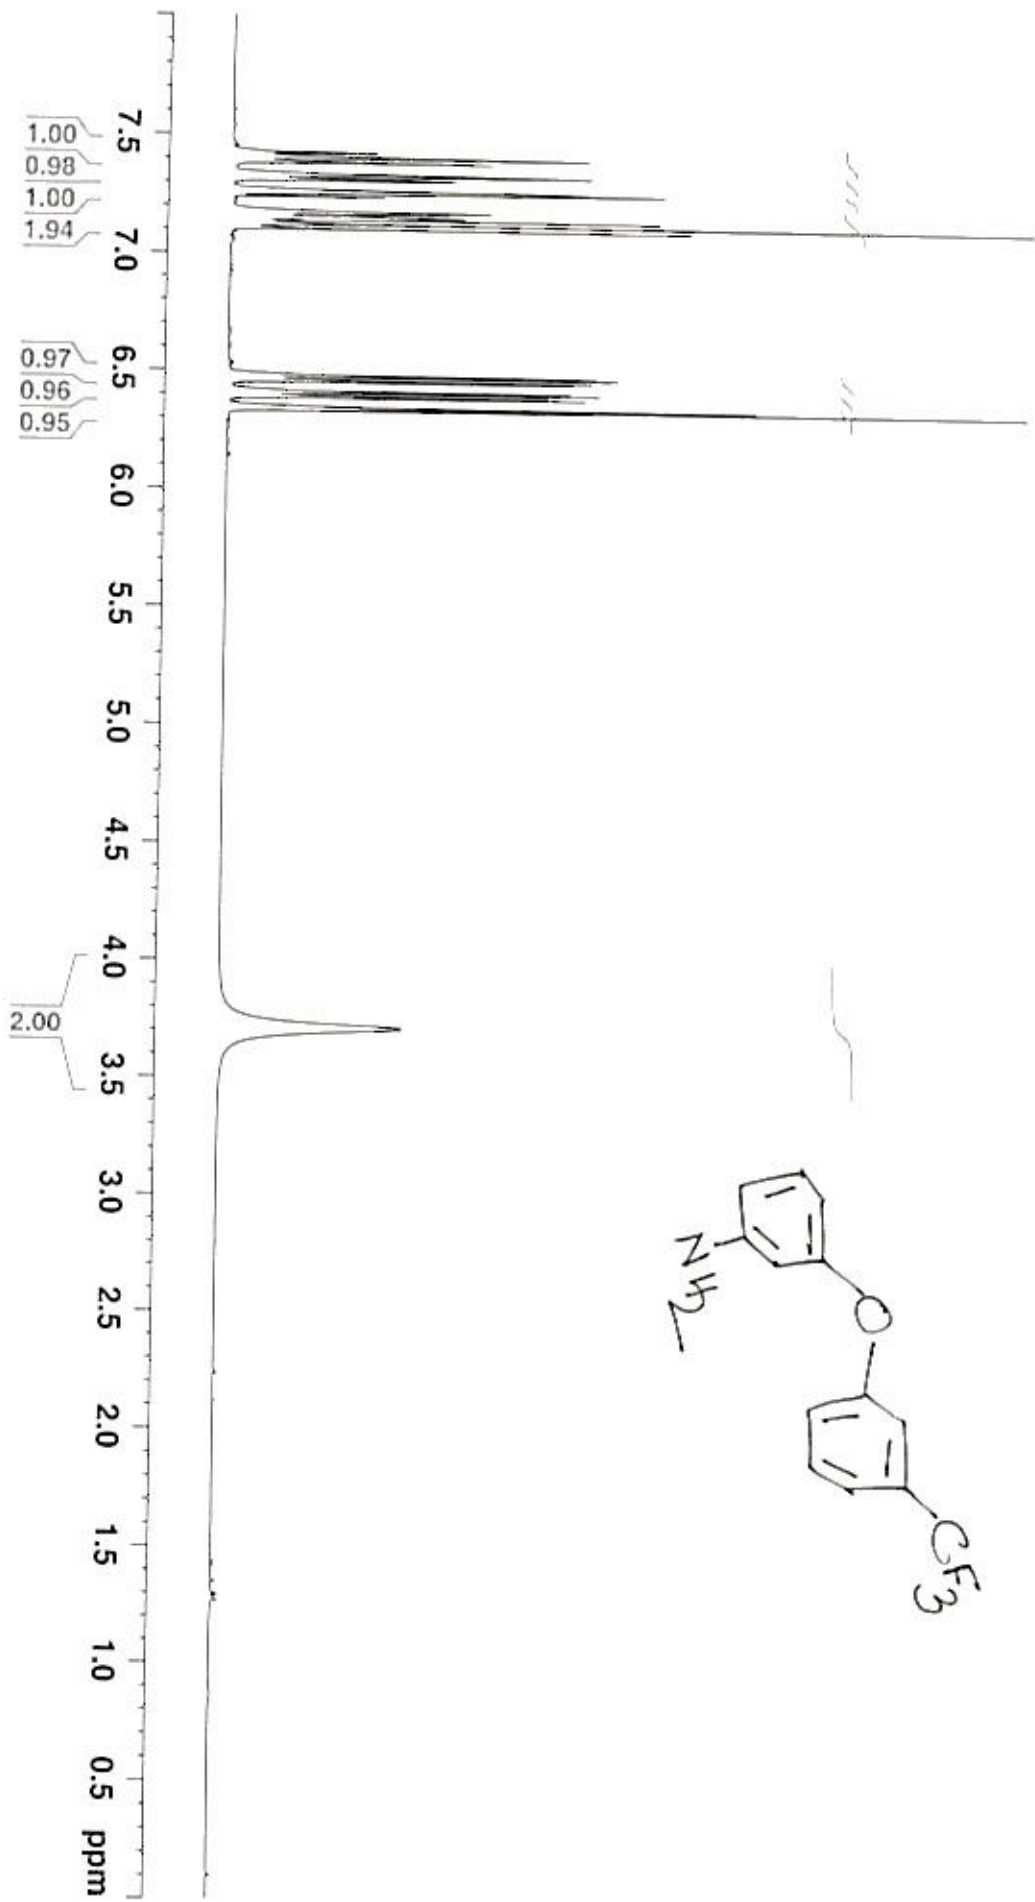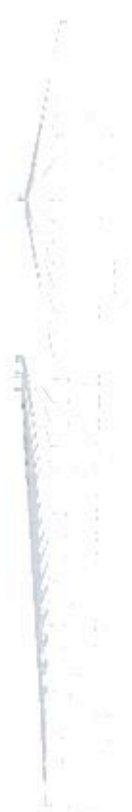

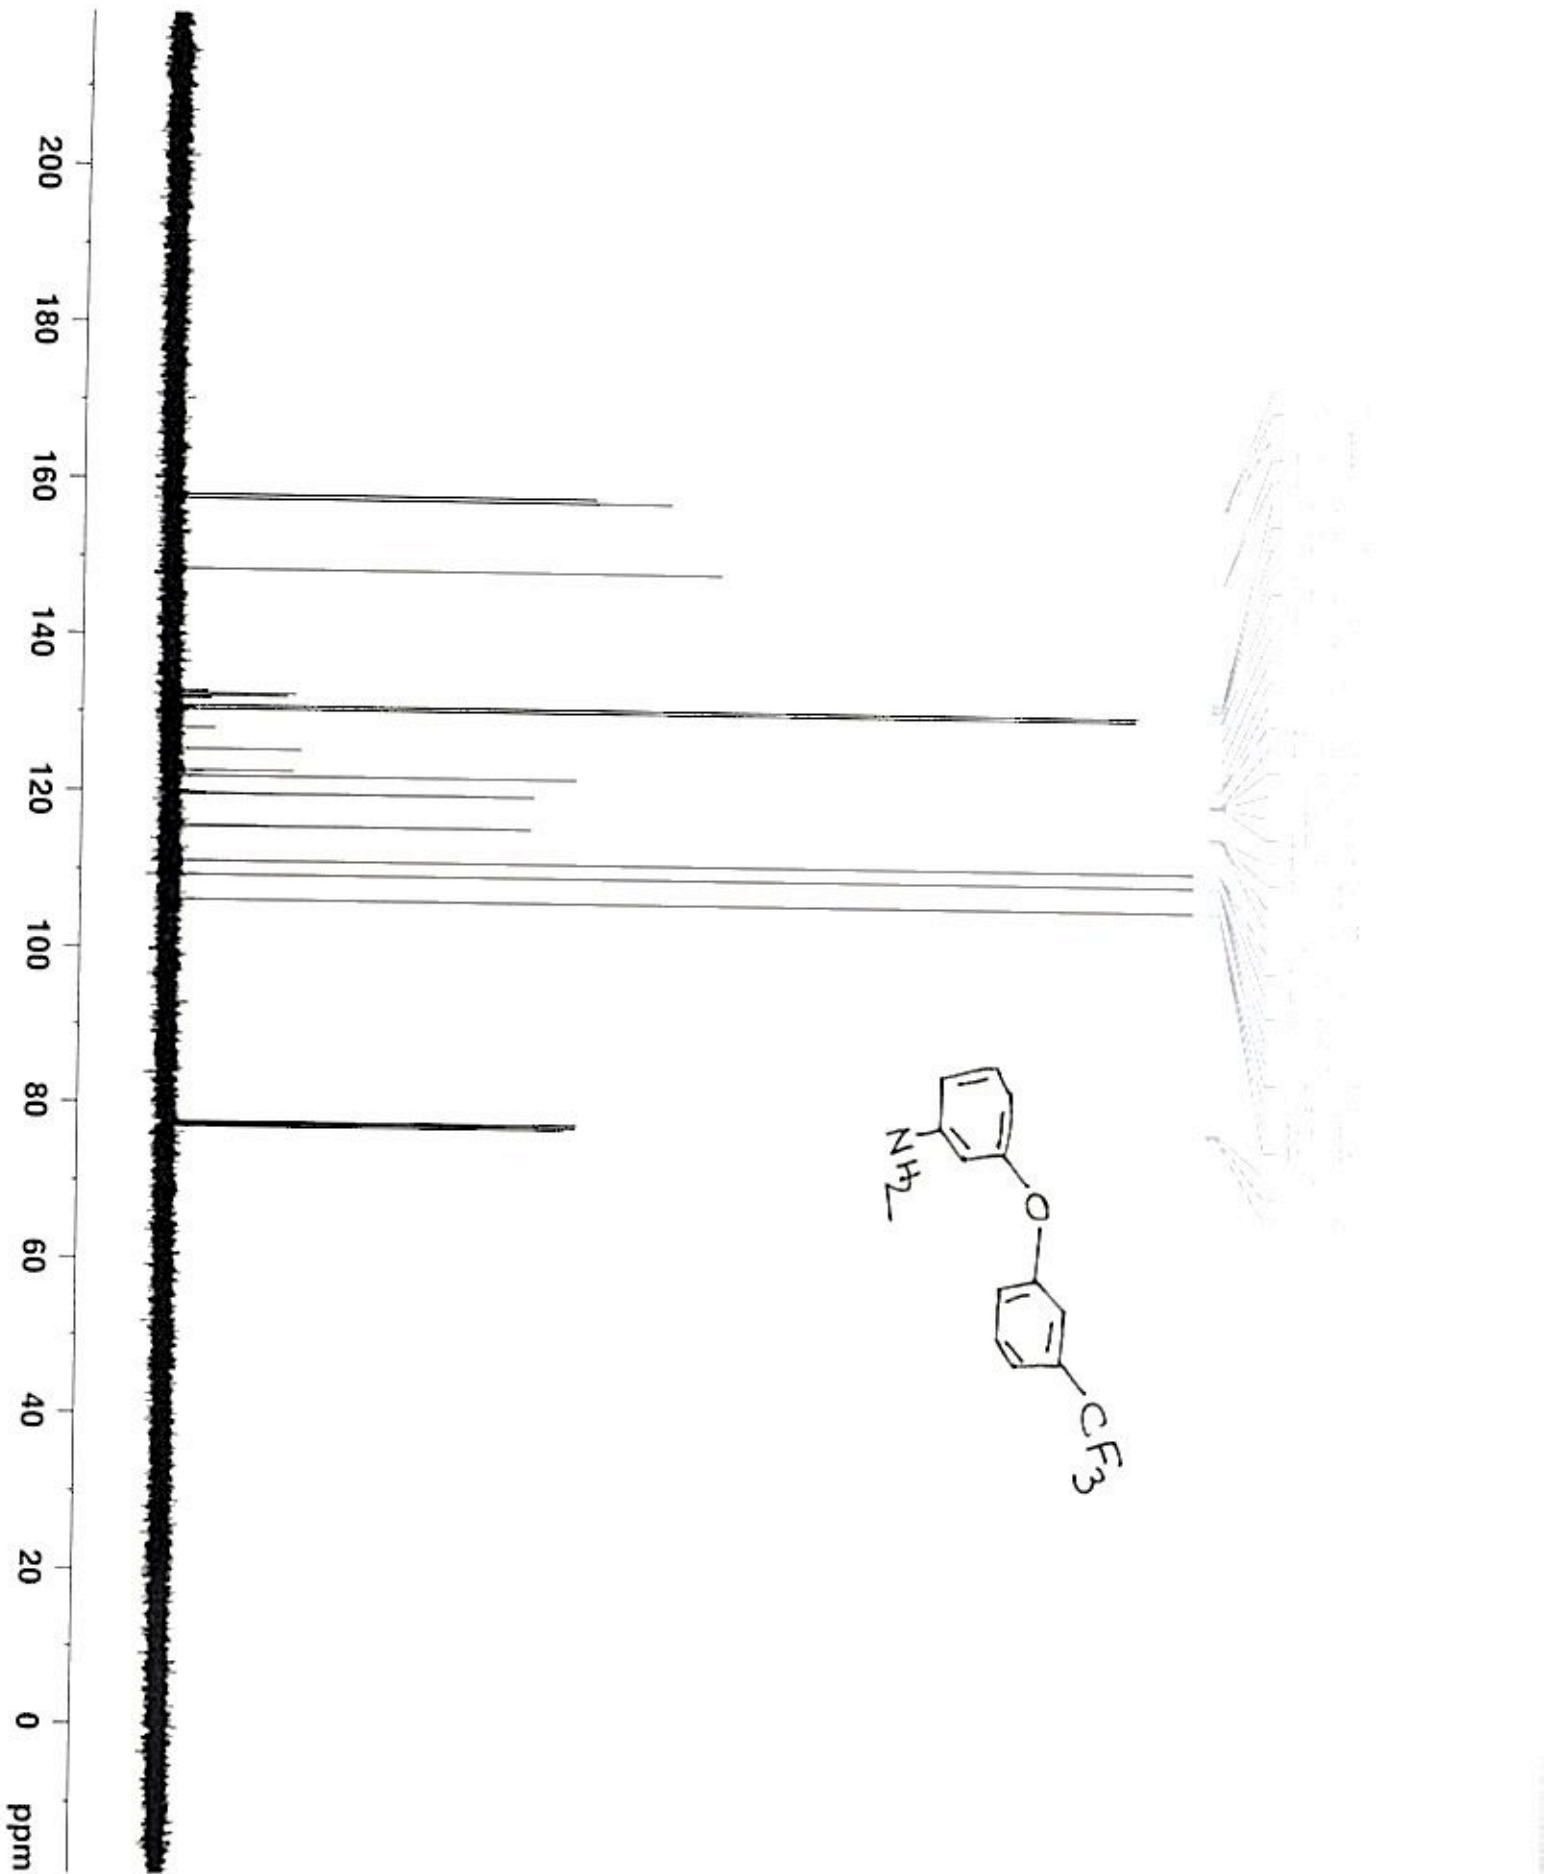

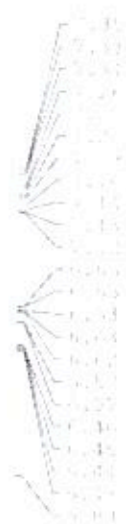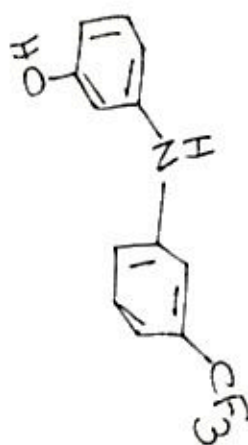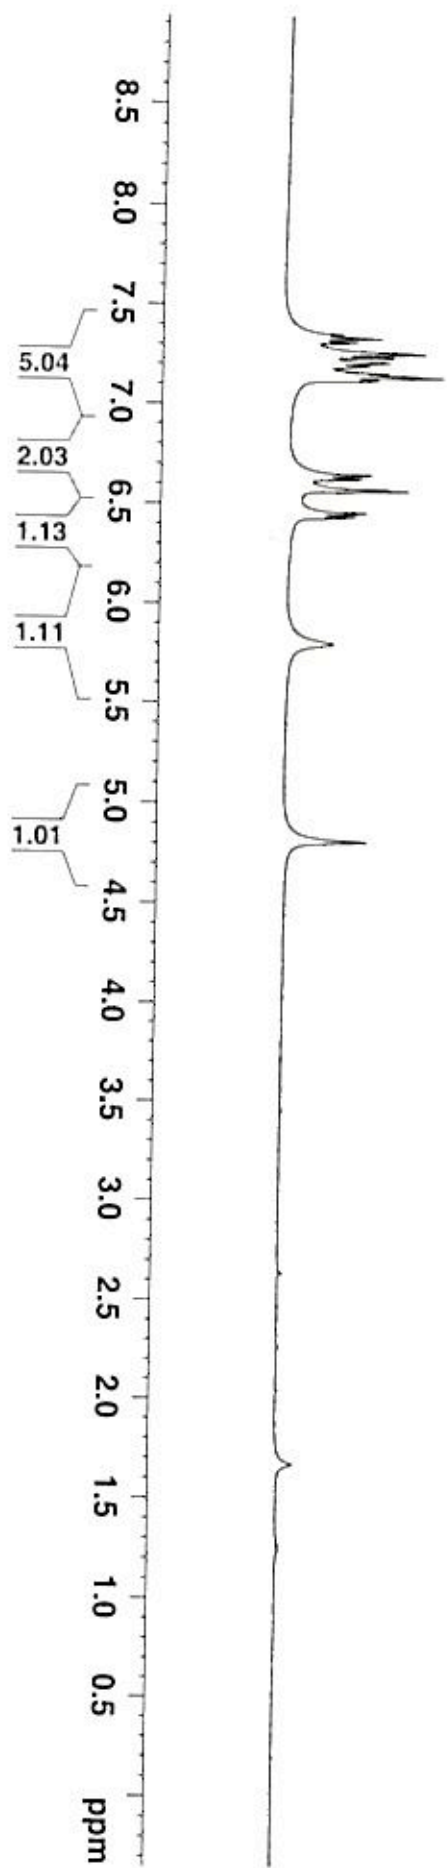



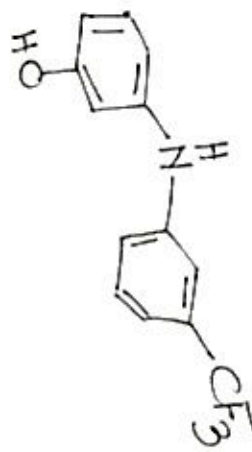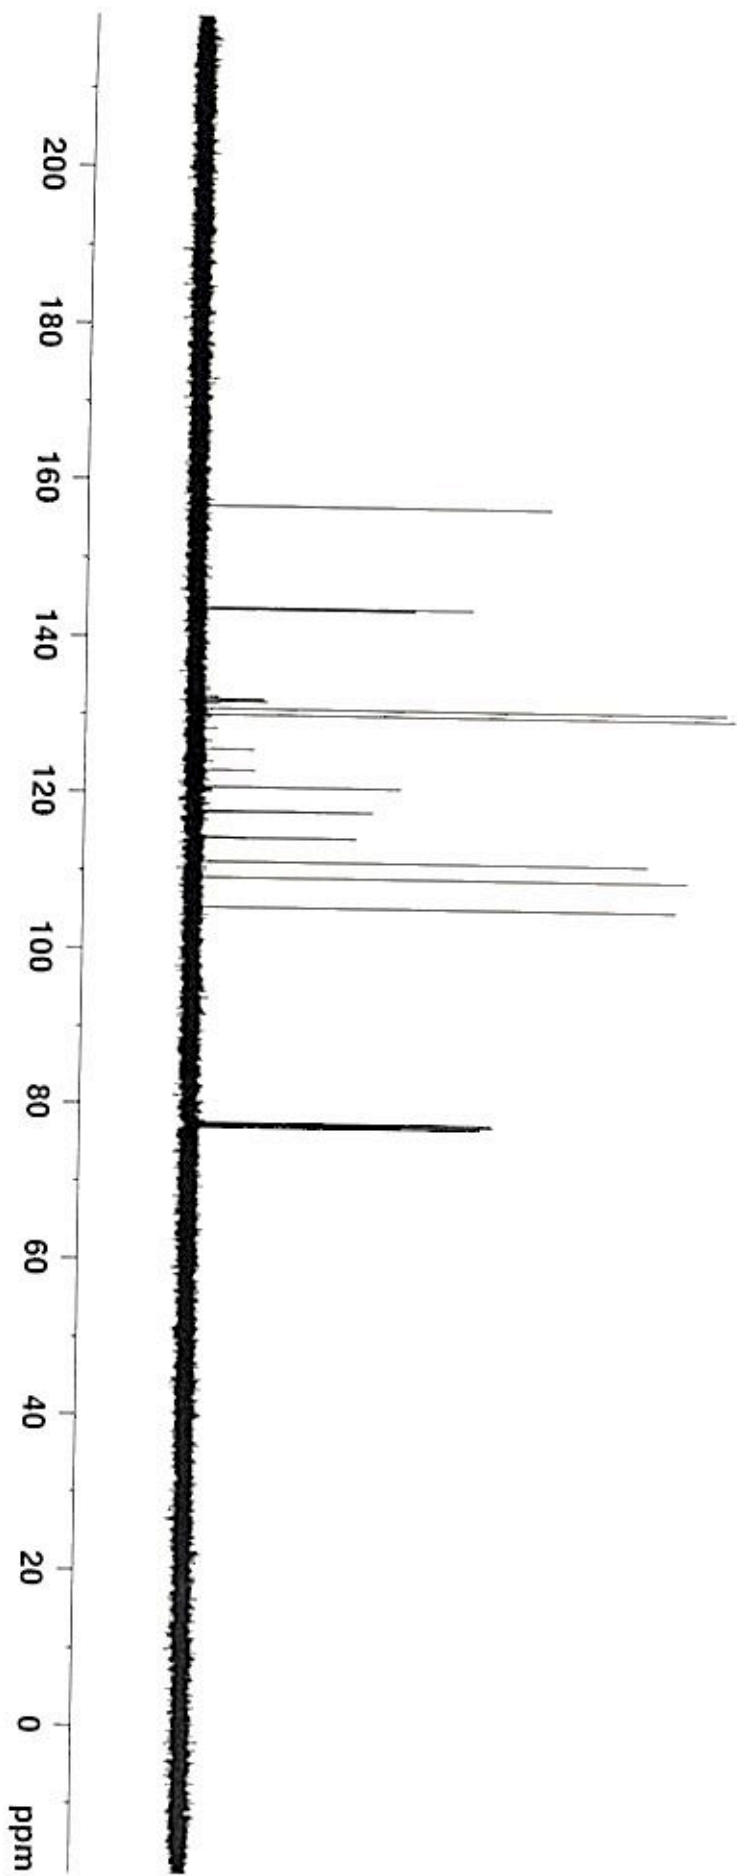

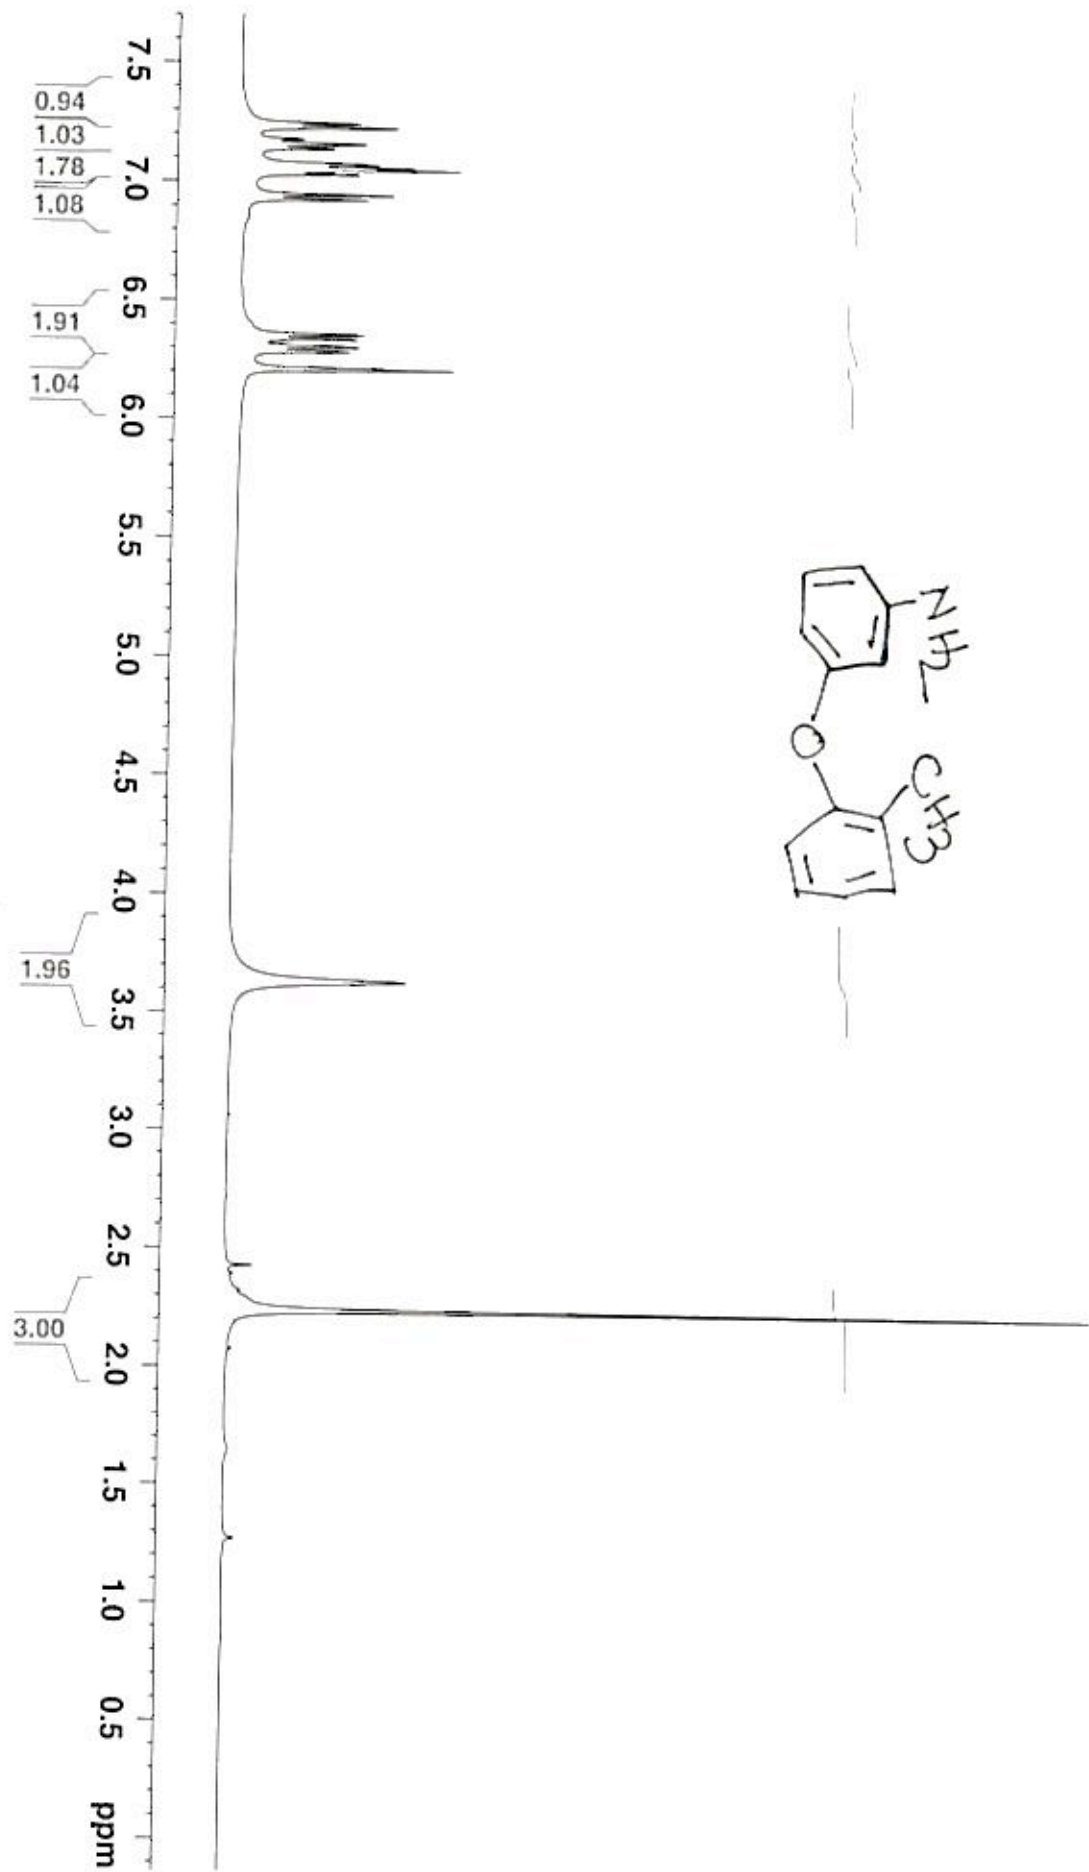

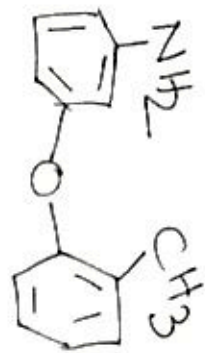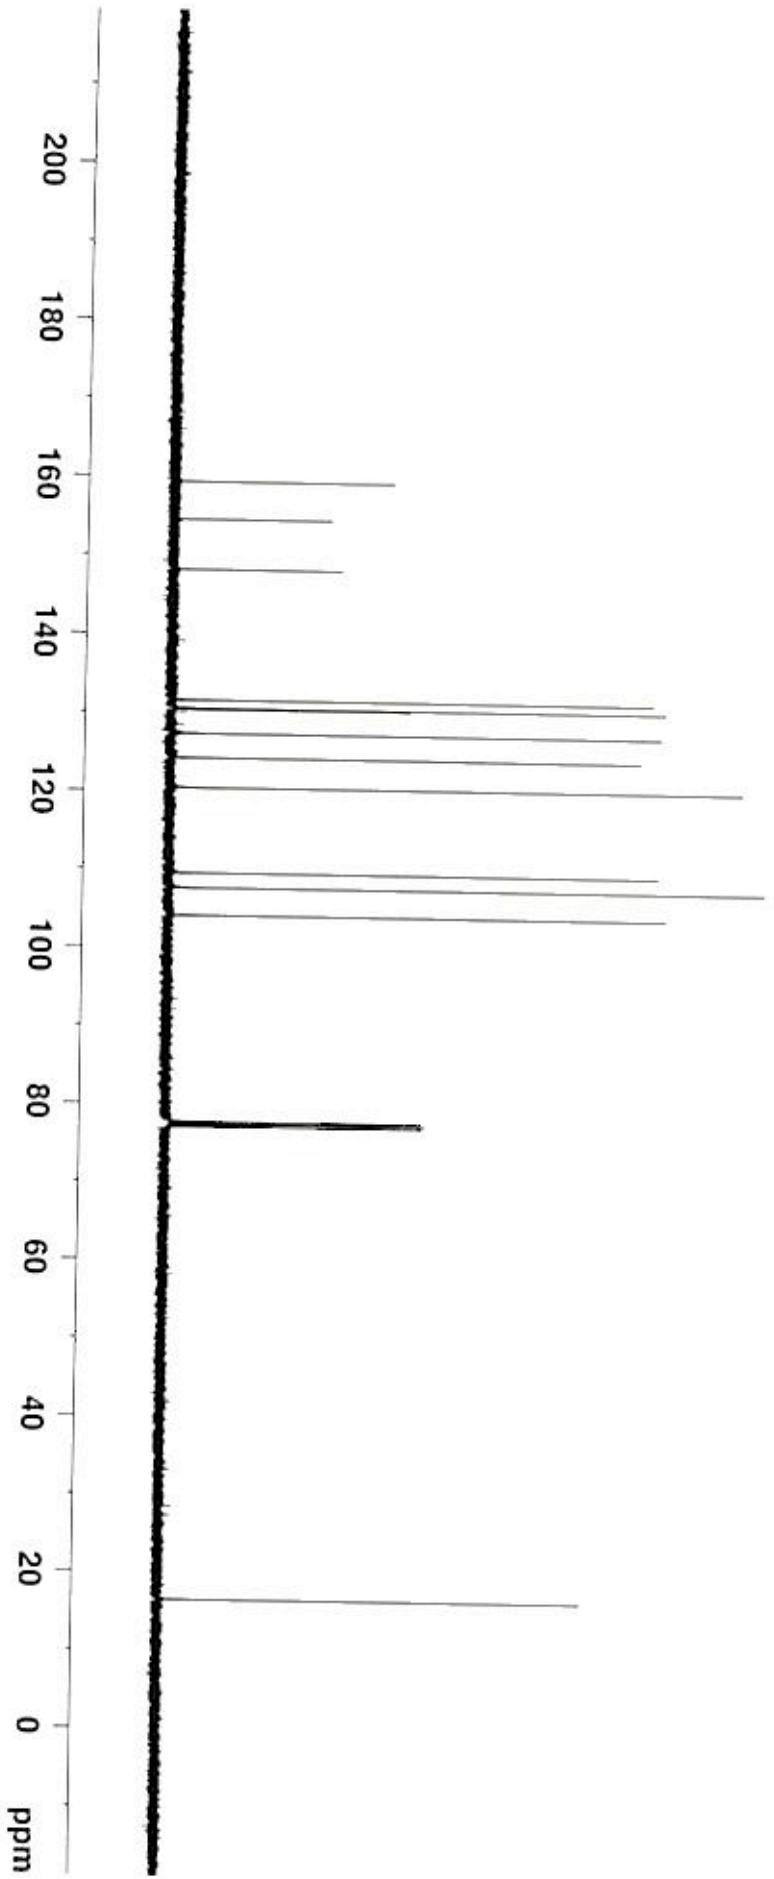

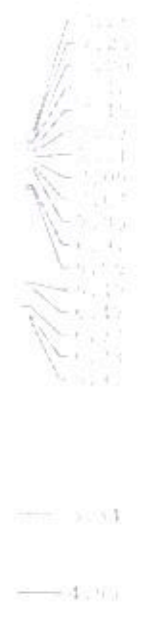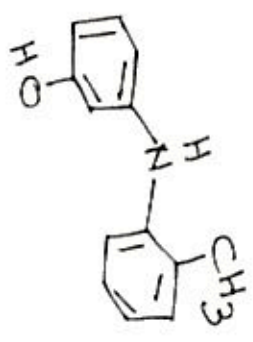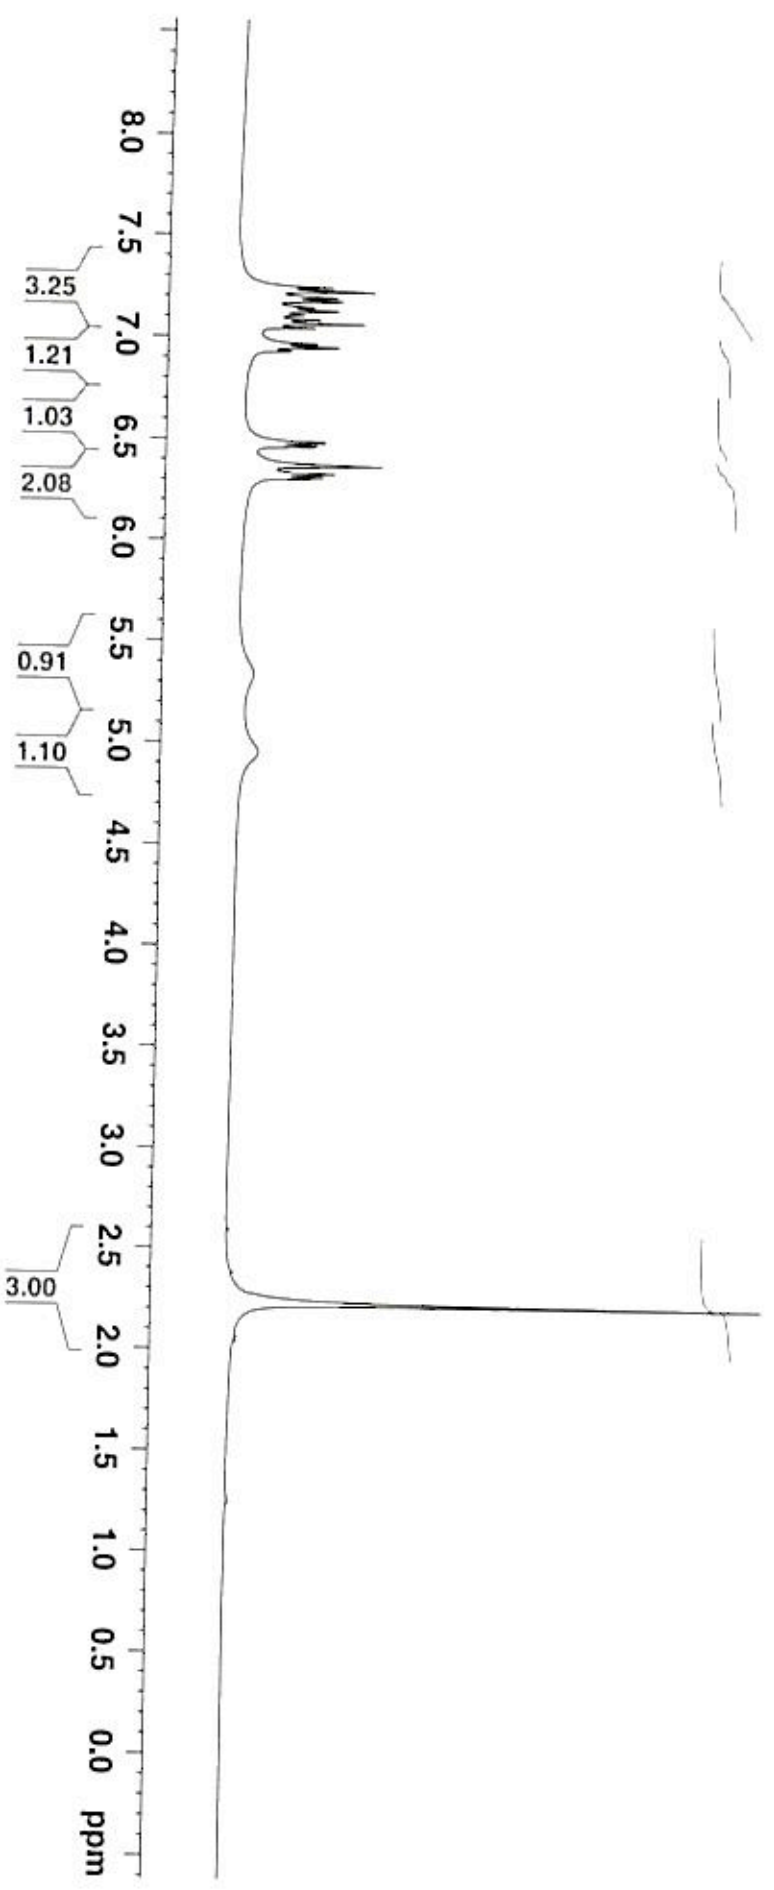

180 170 160 150 140 130 120 110 100 90 80 70 60 50 40 30 20 10 ppm

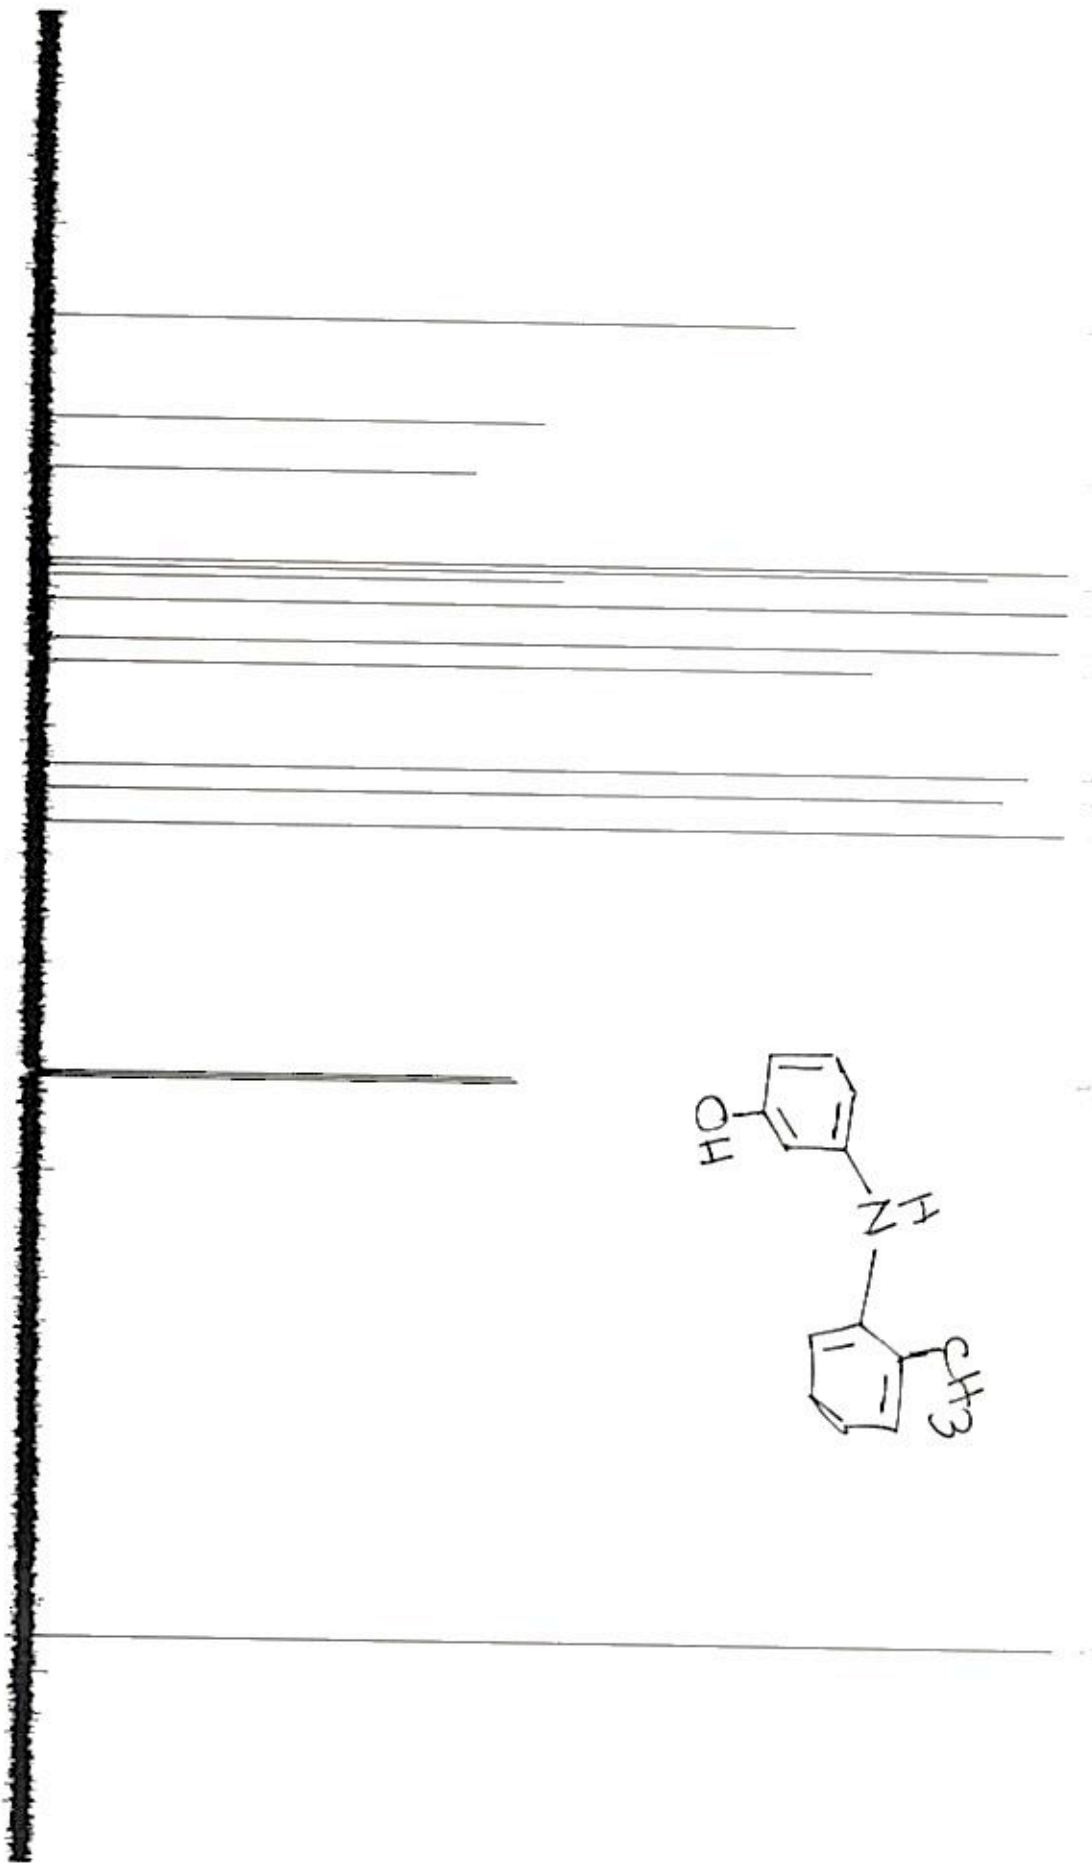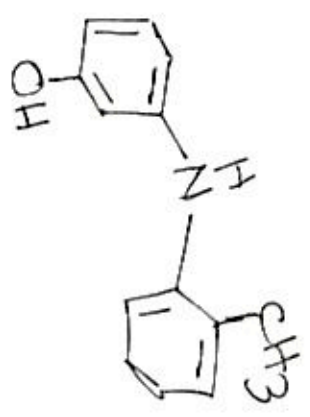

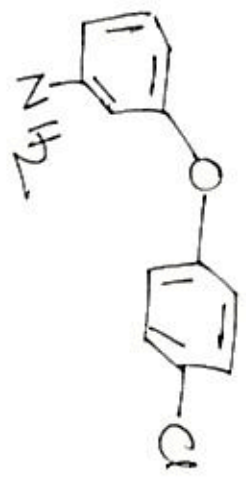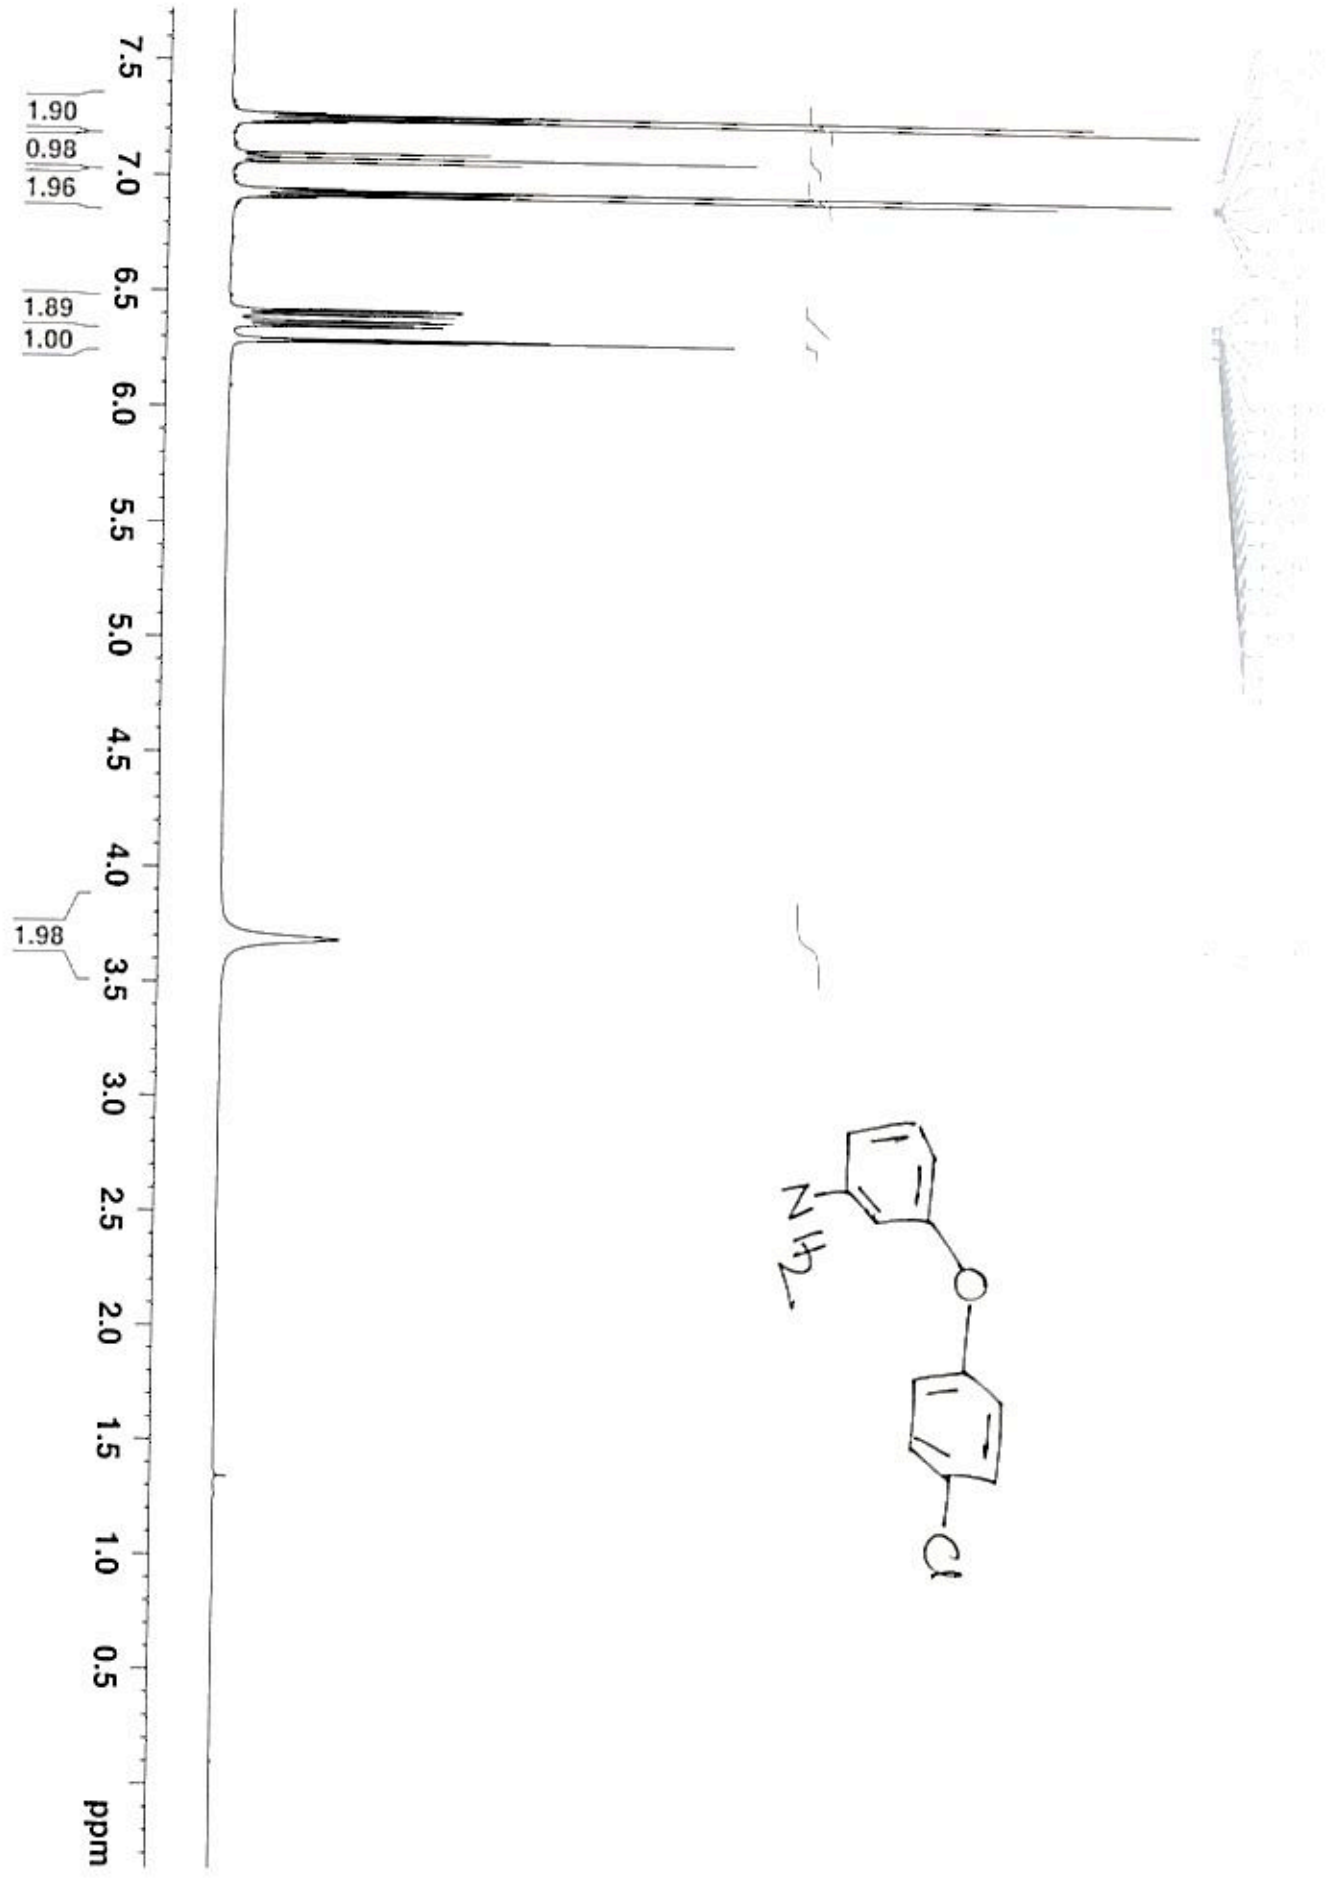

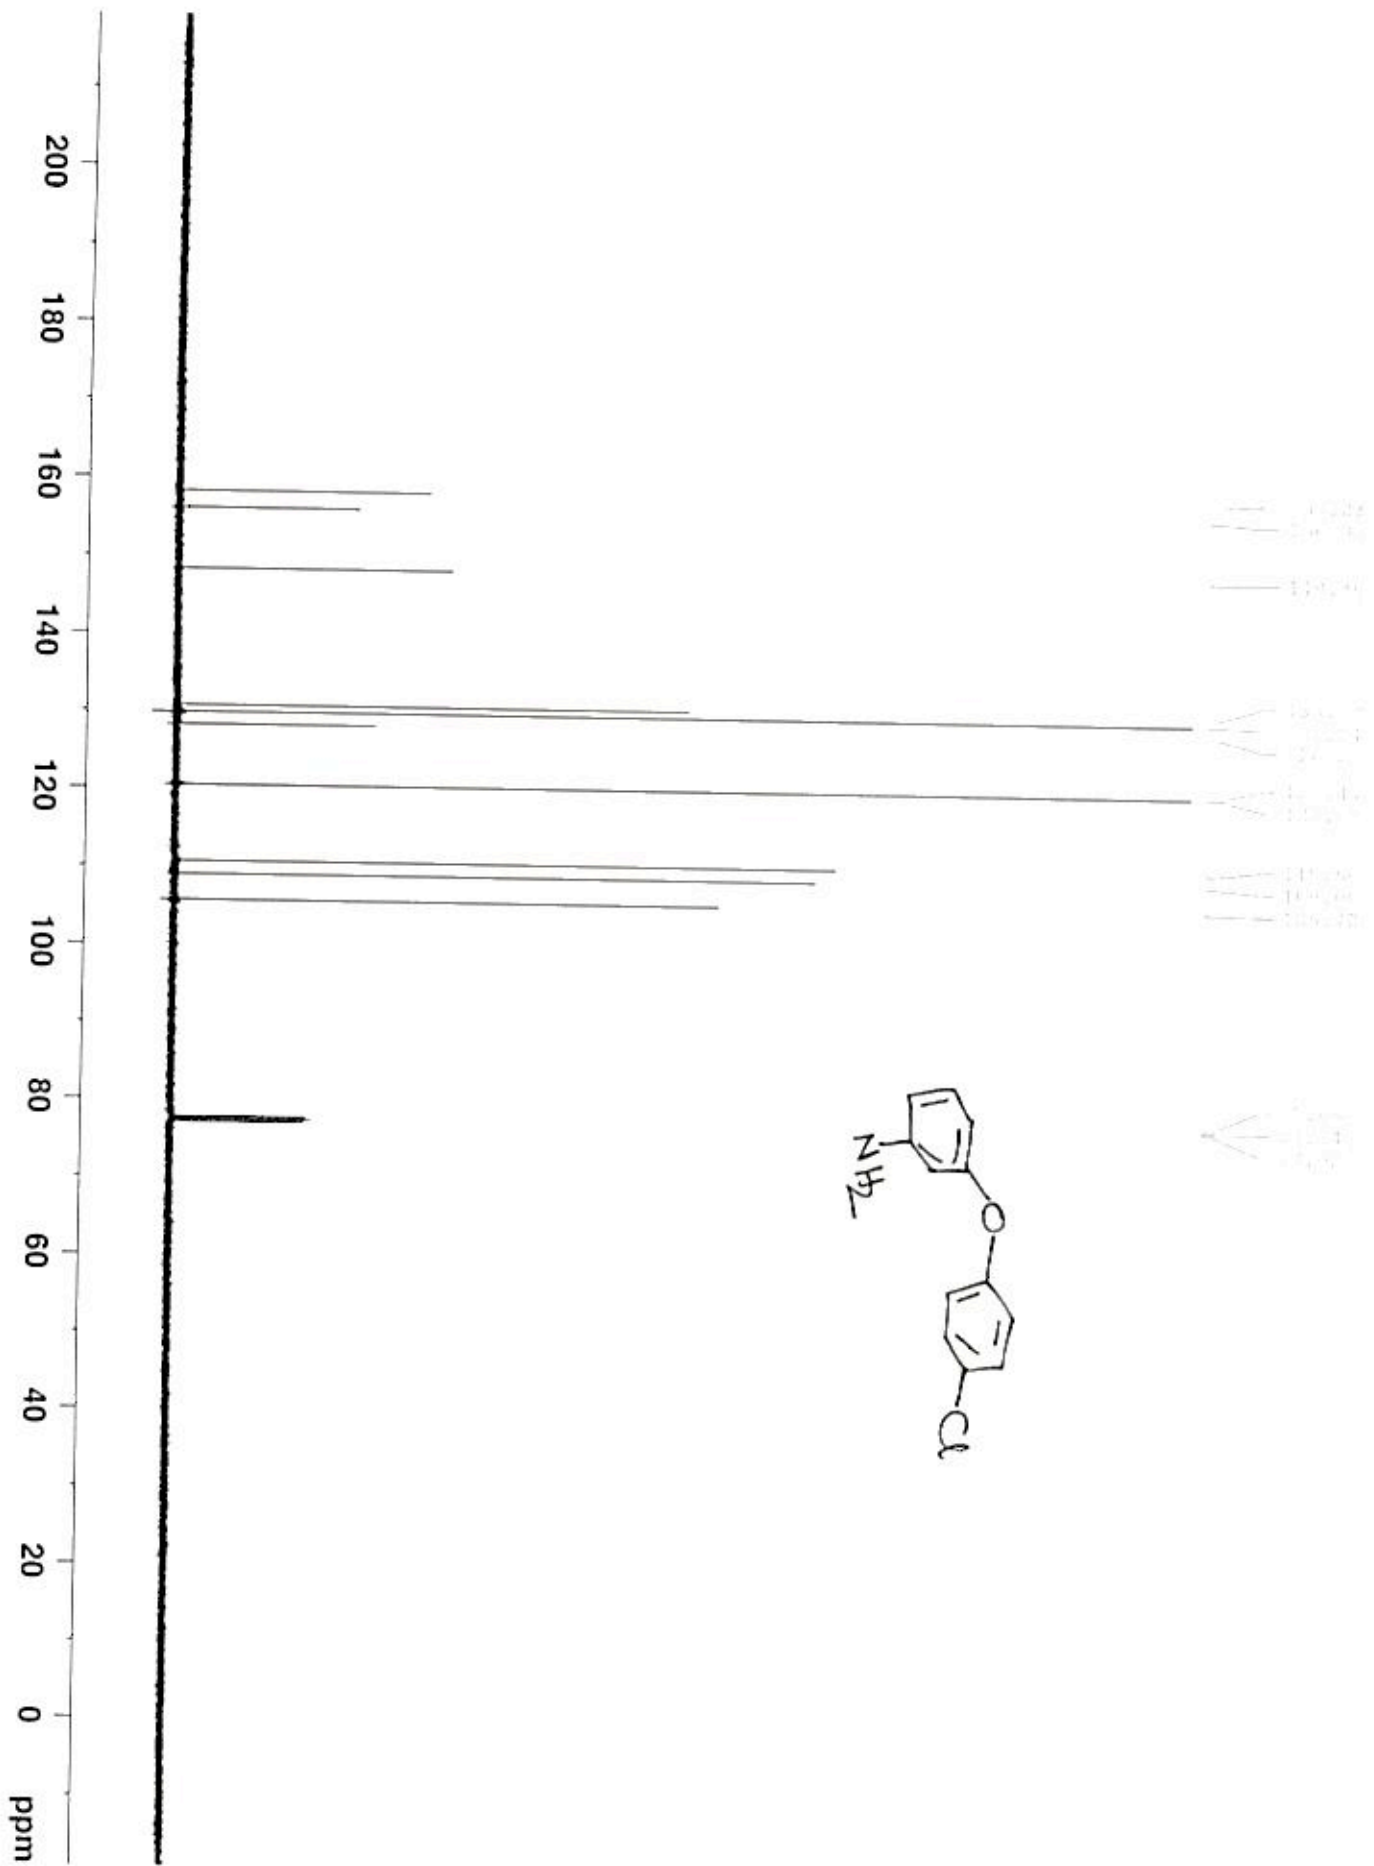

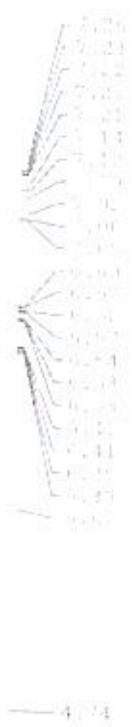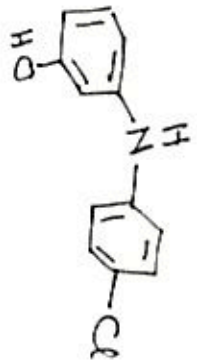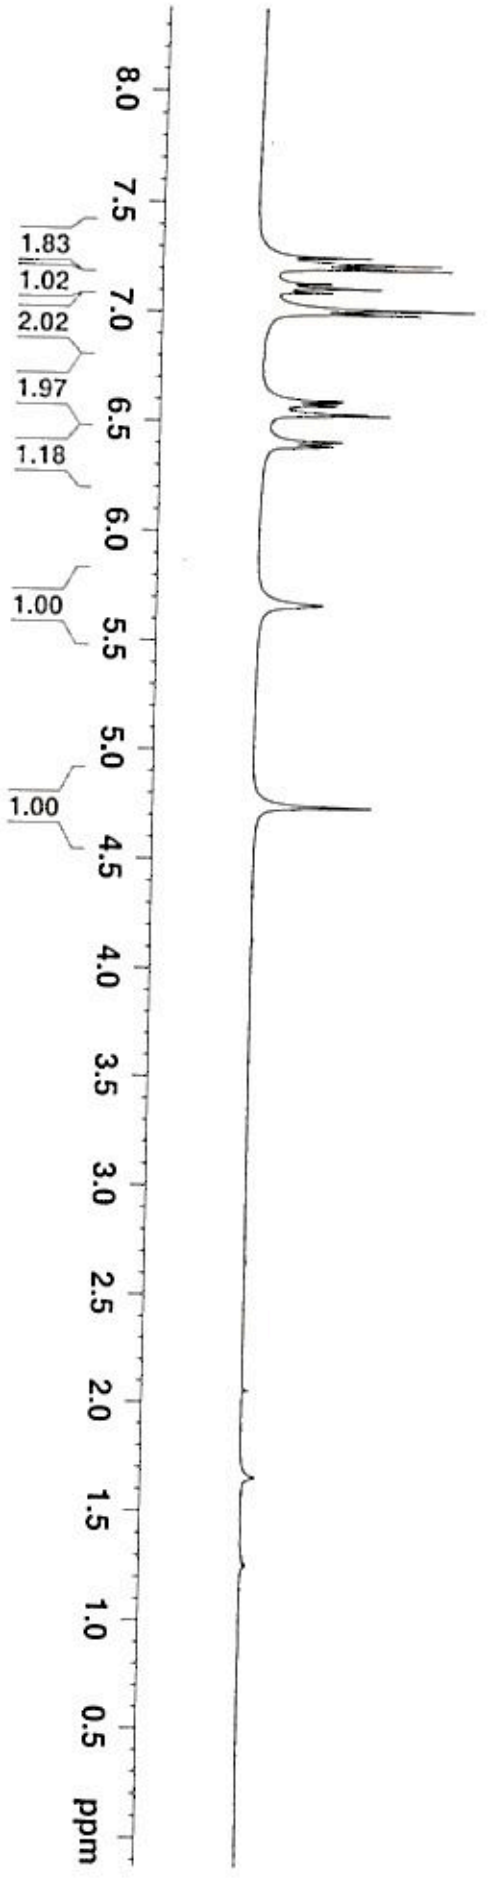



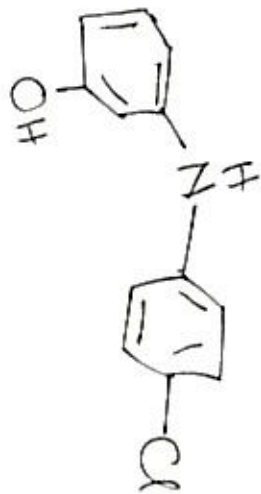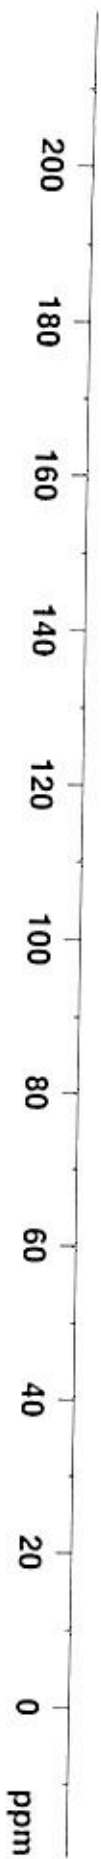

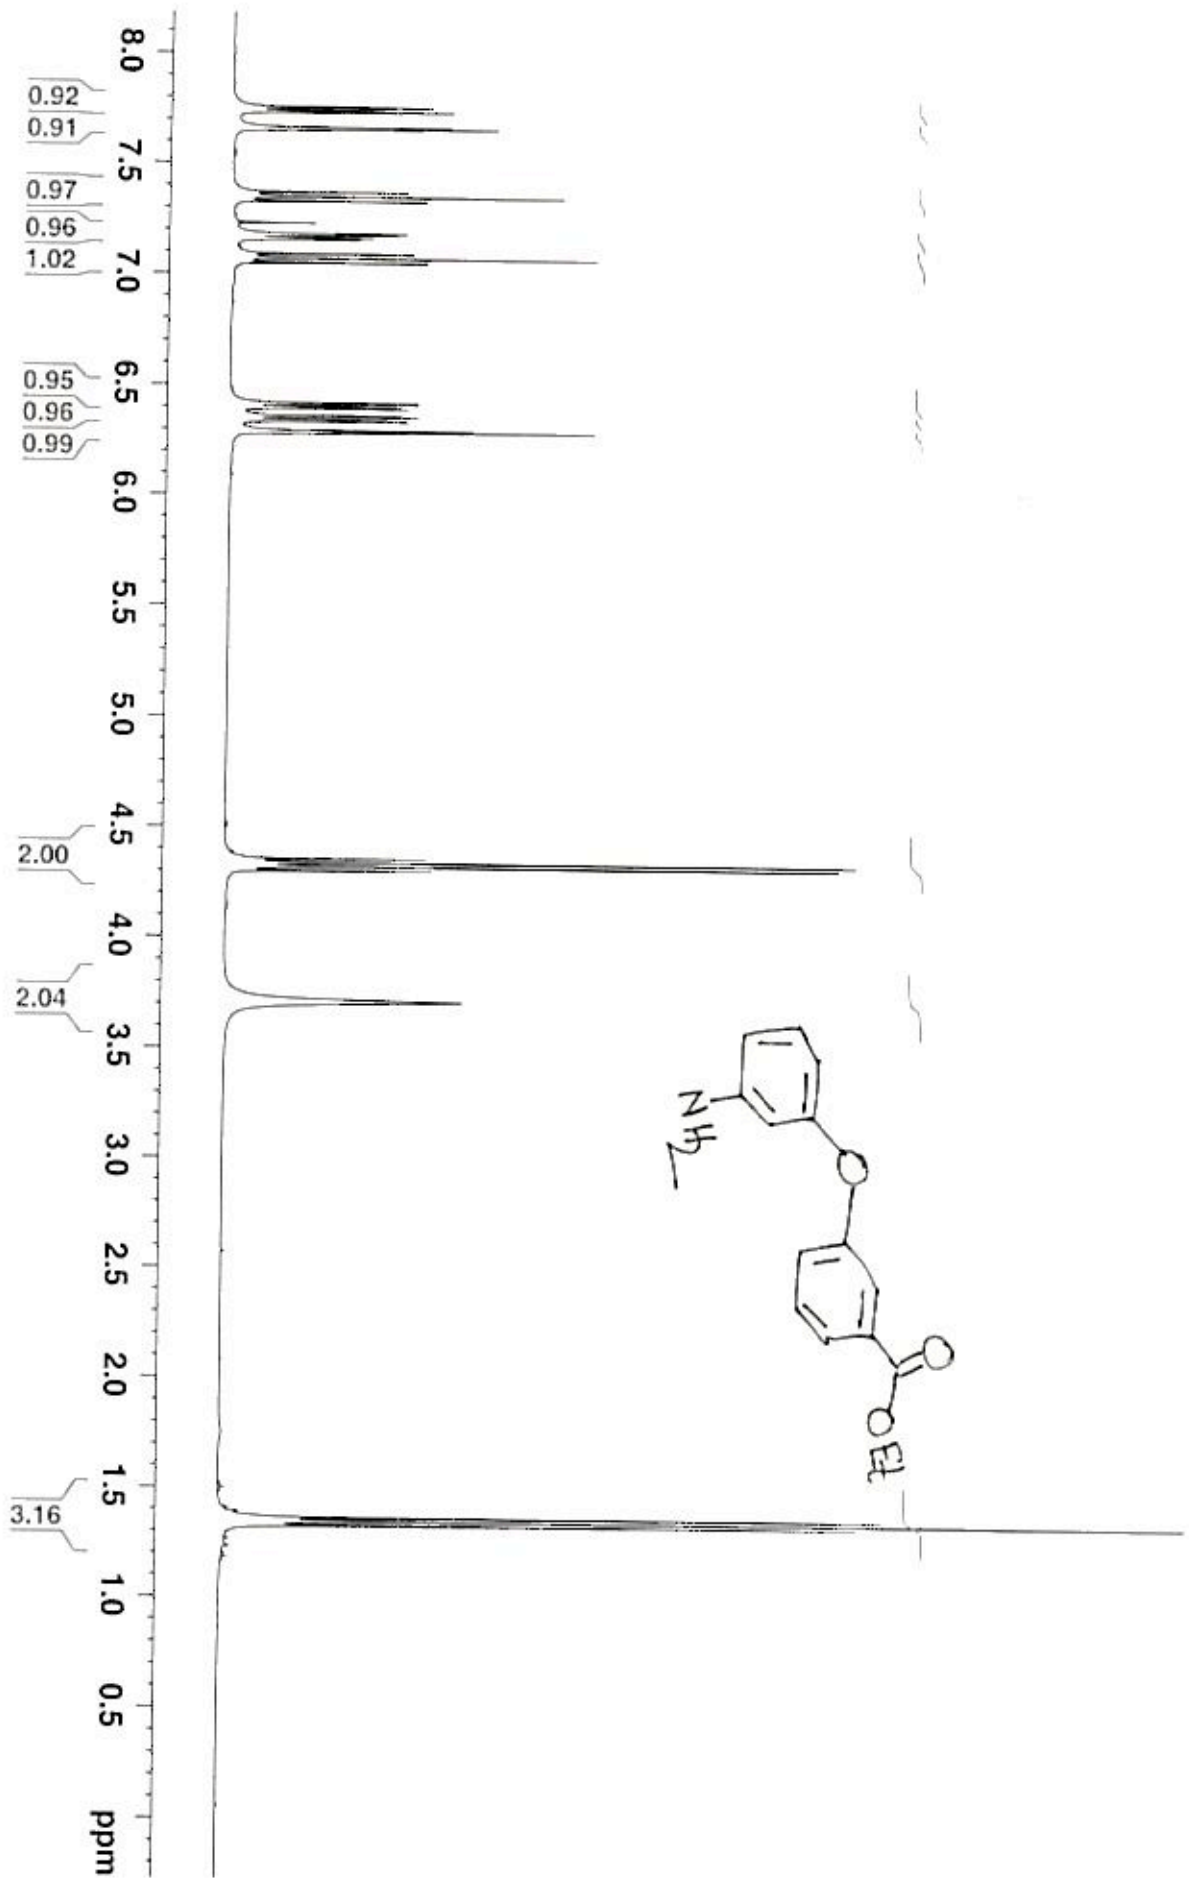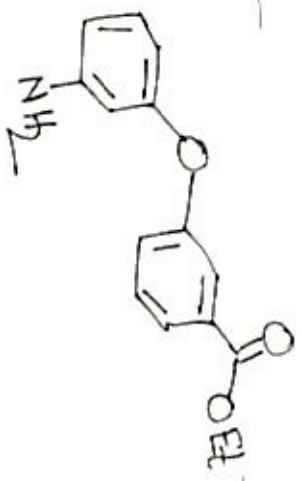

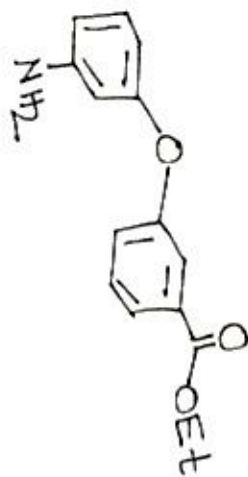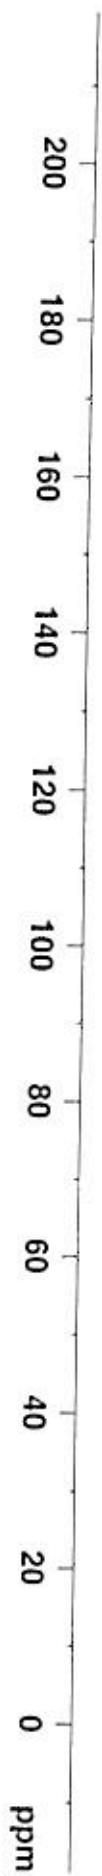

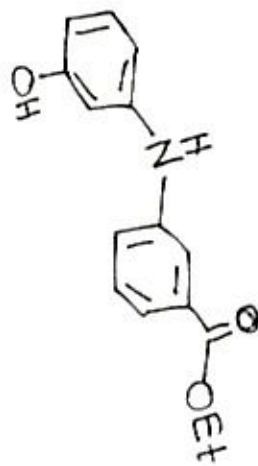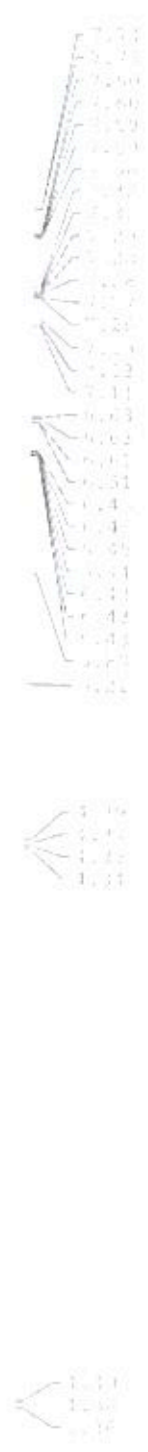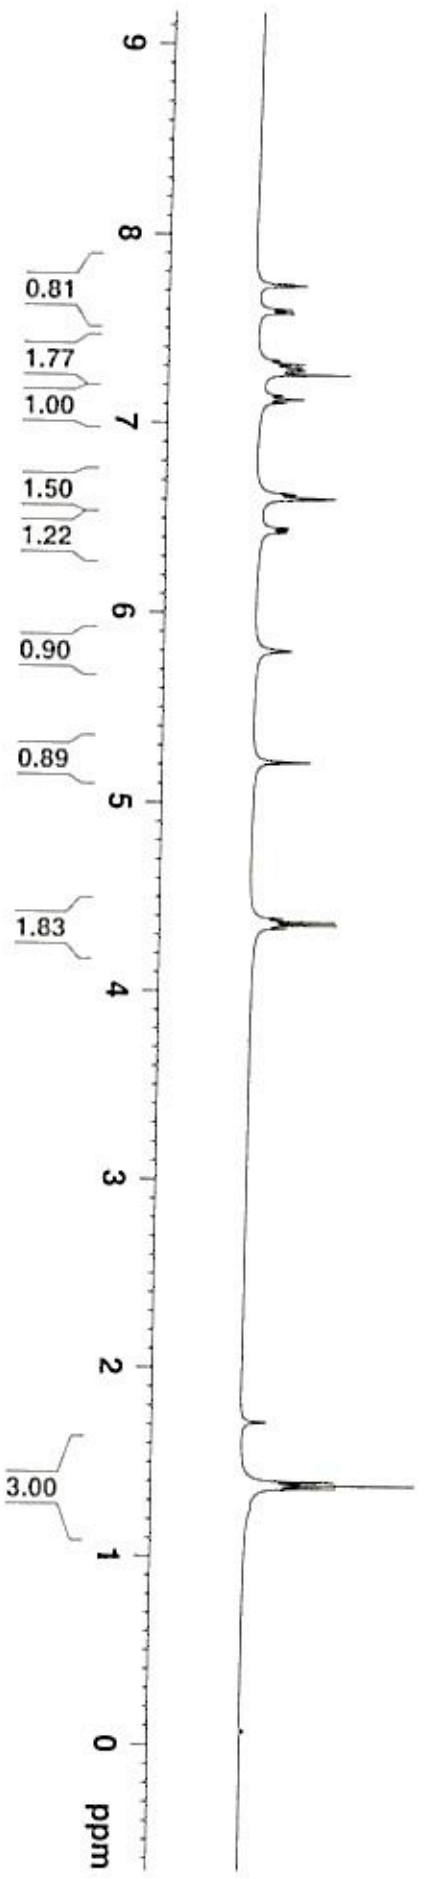

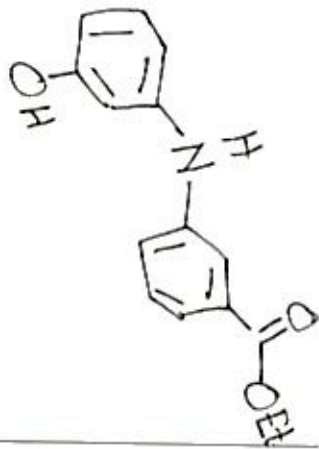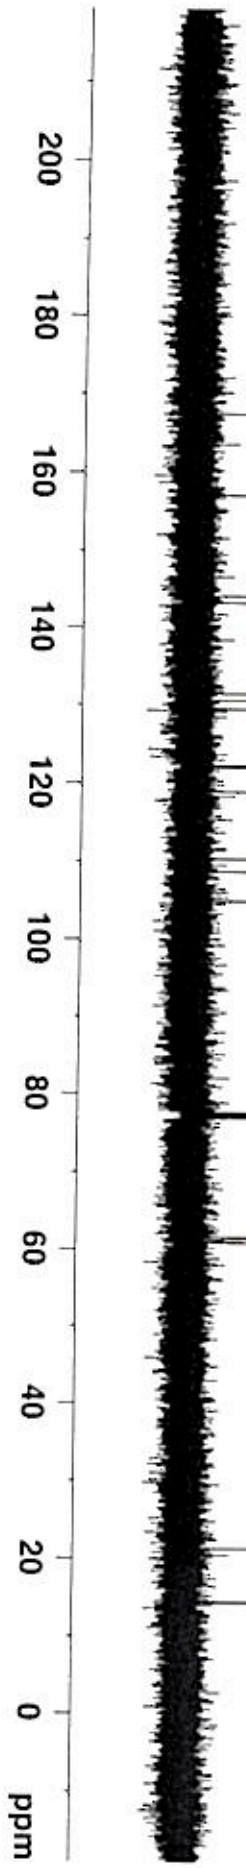

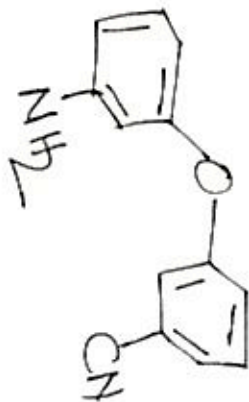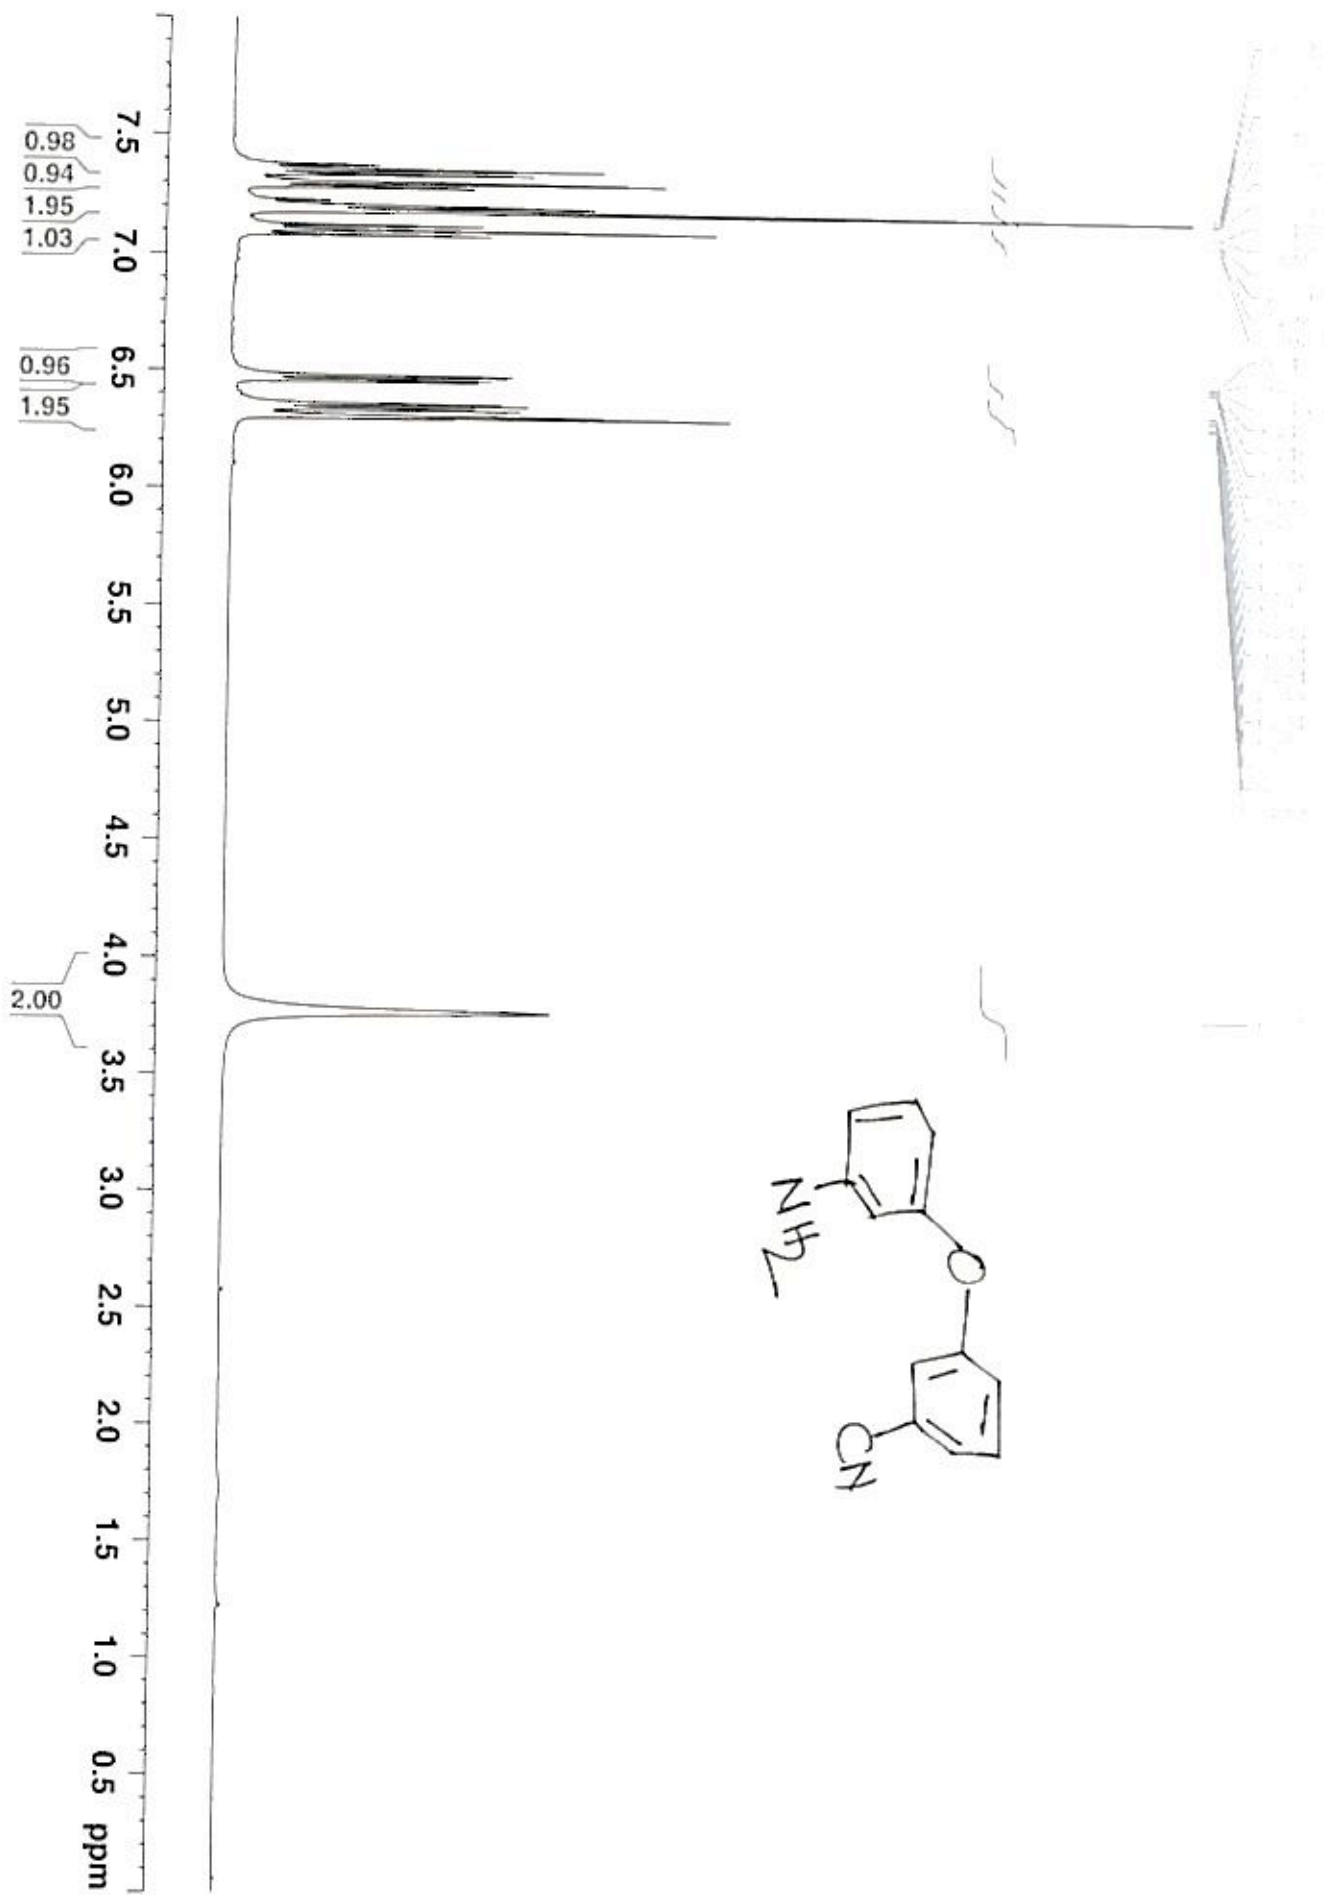

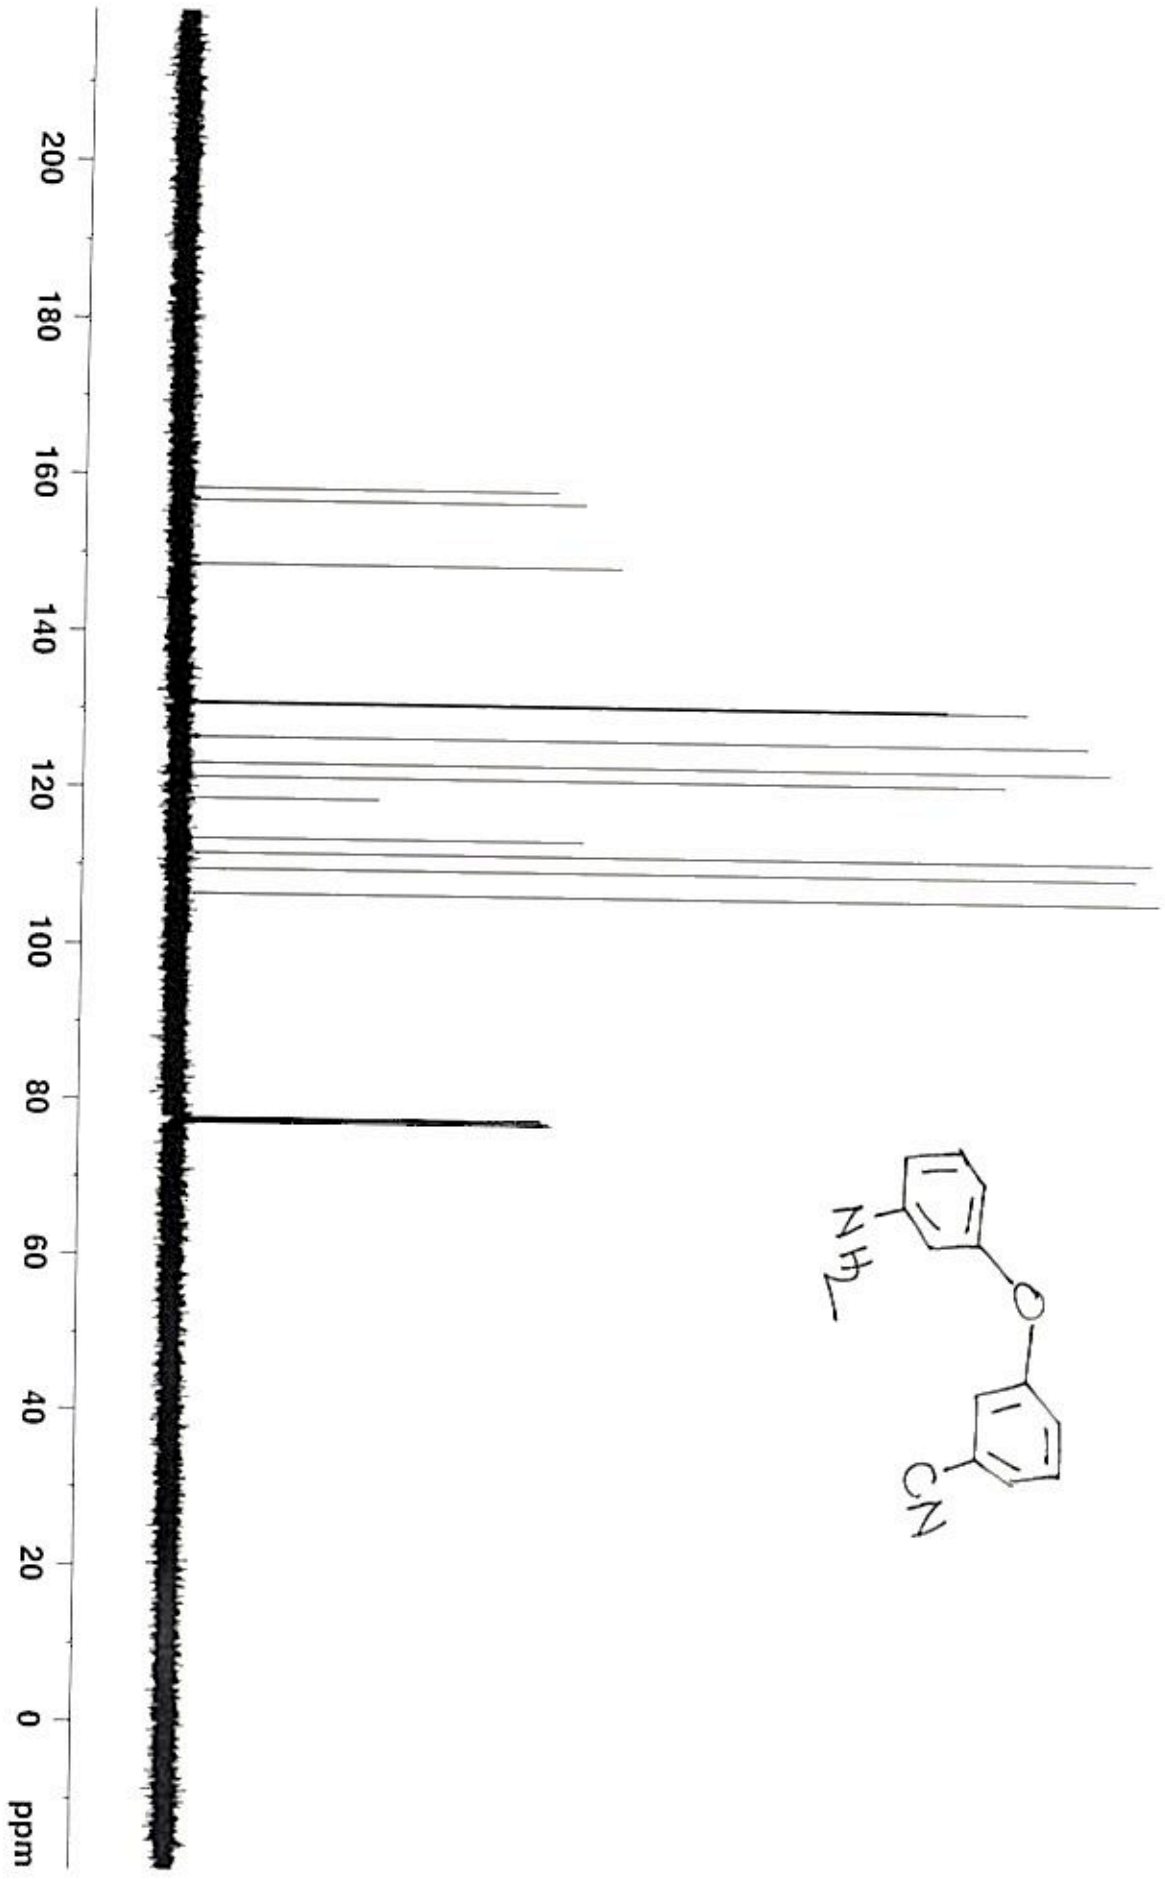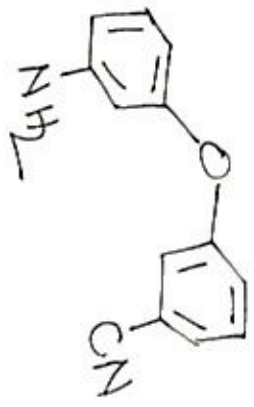

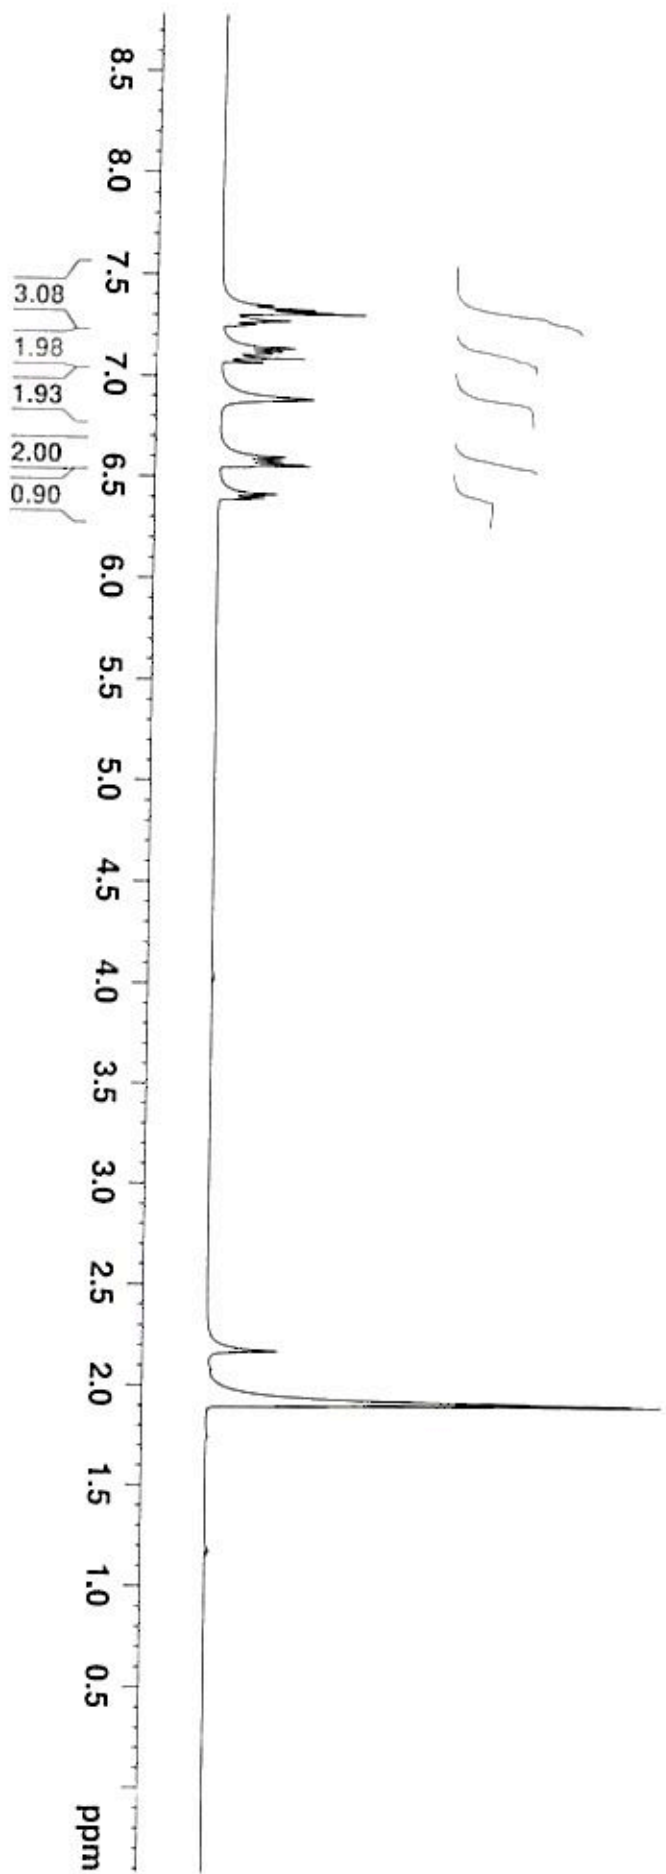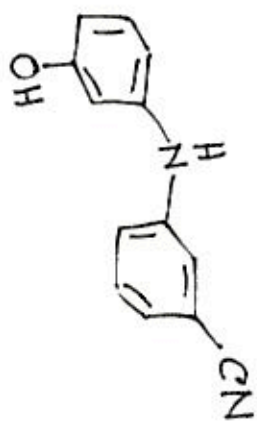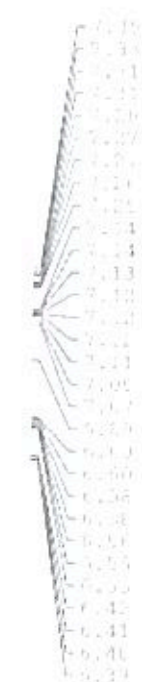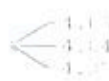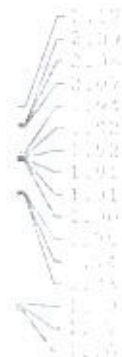



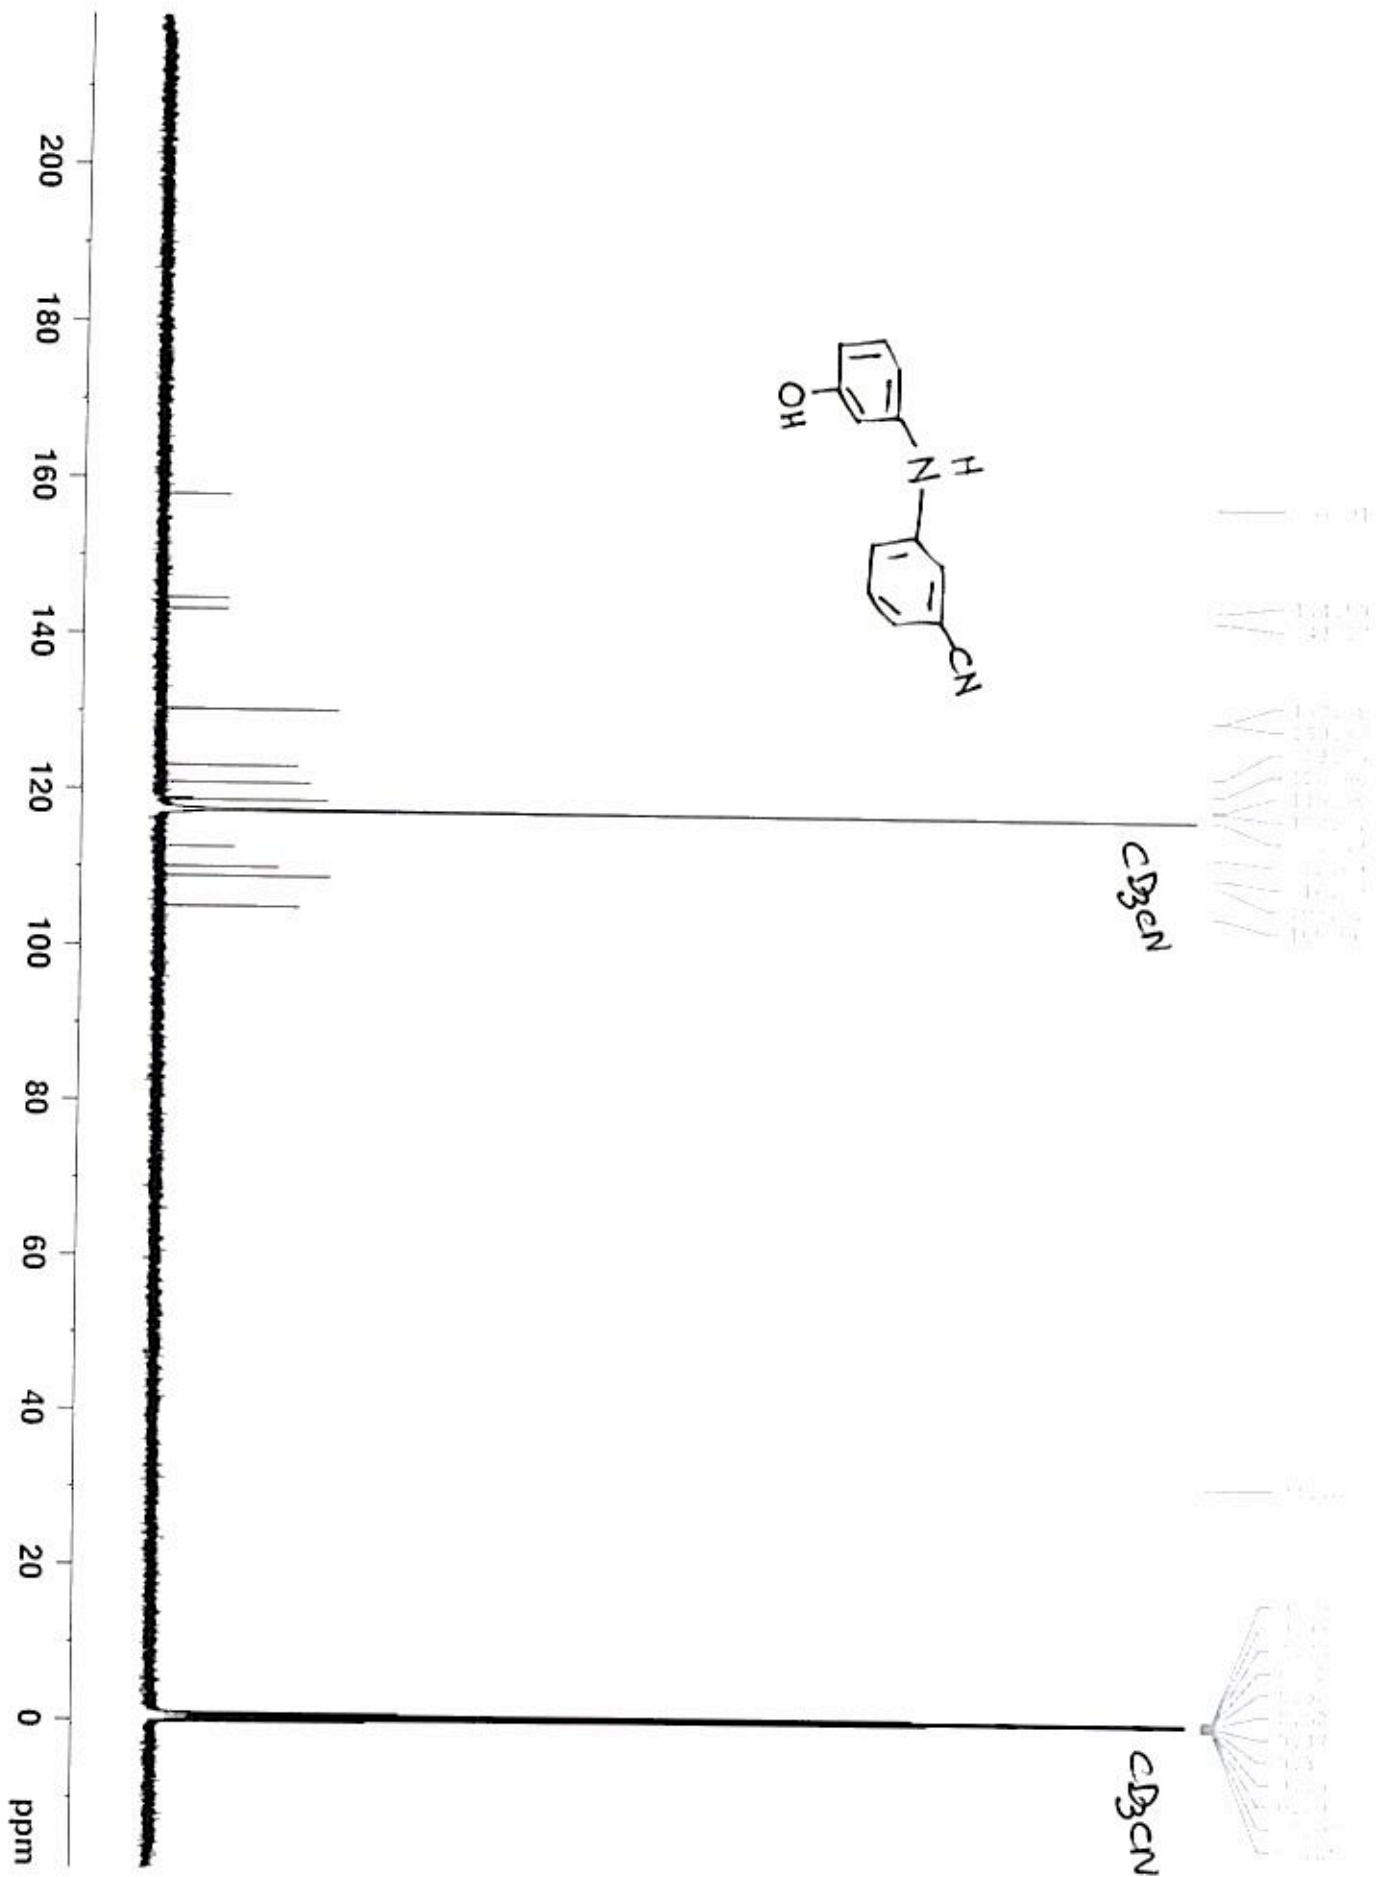

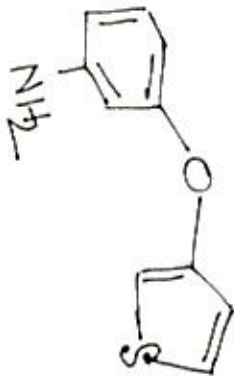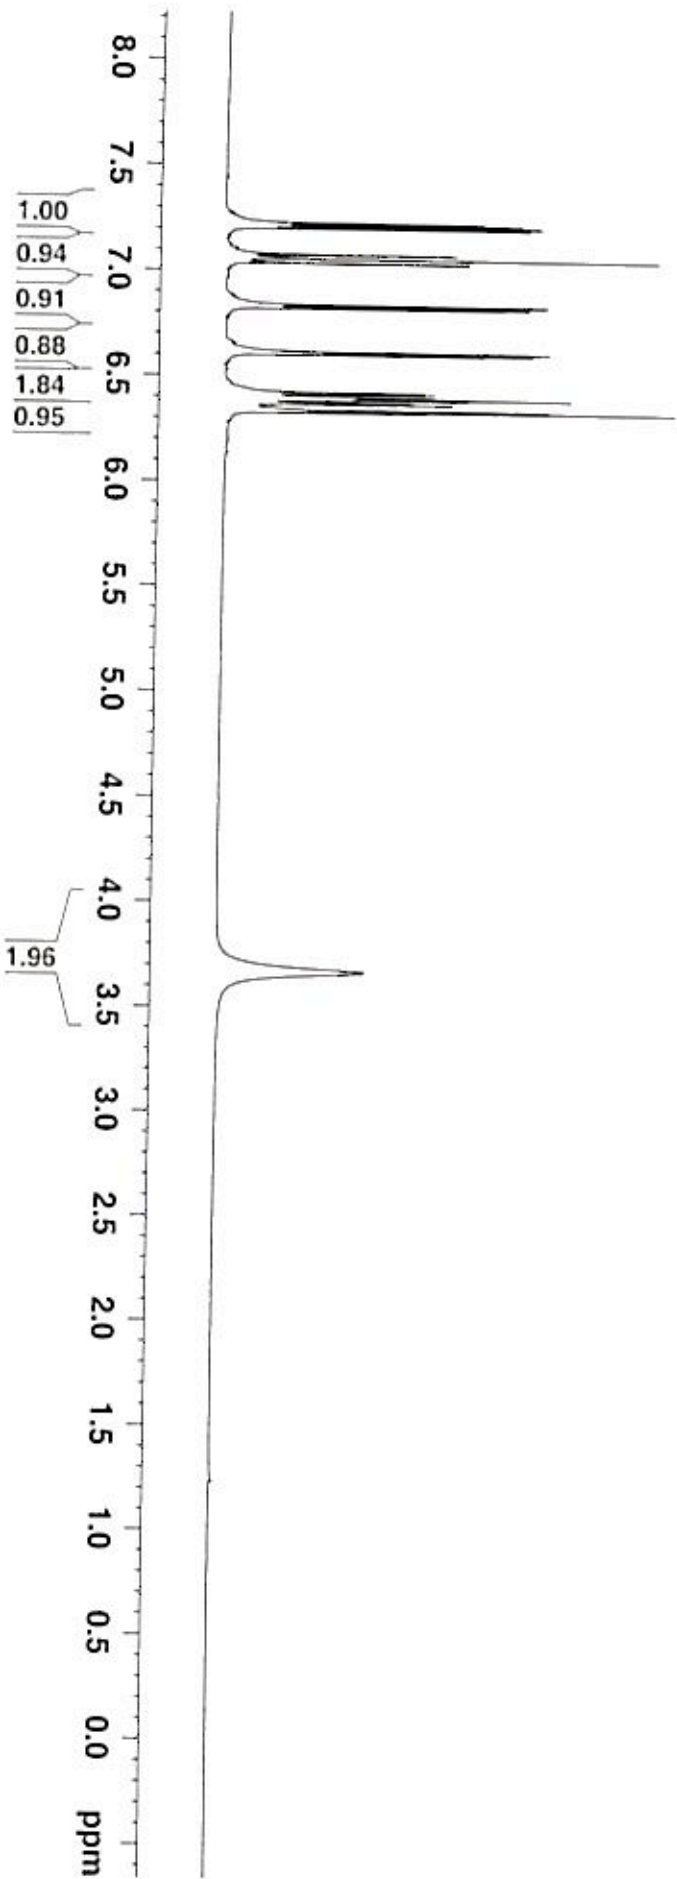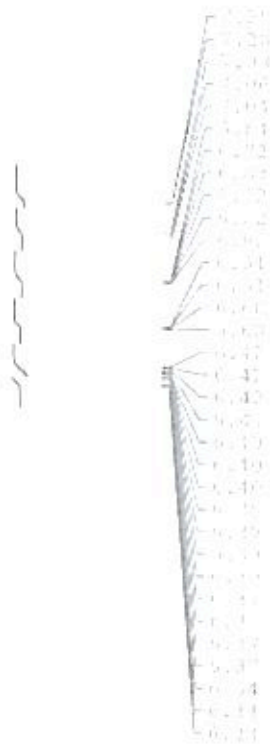

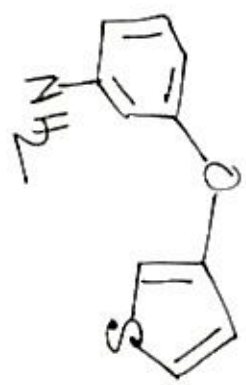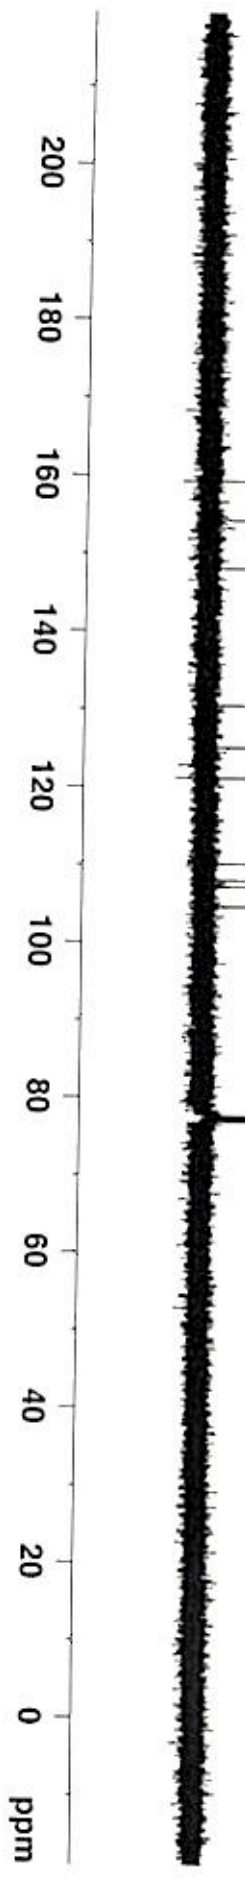

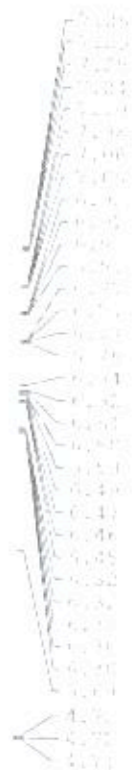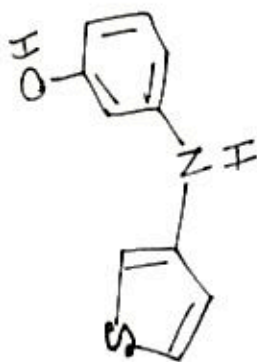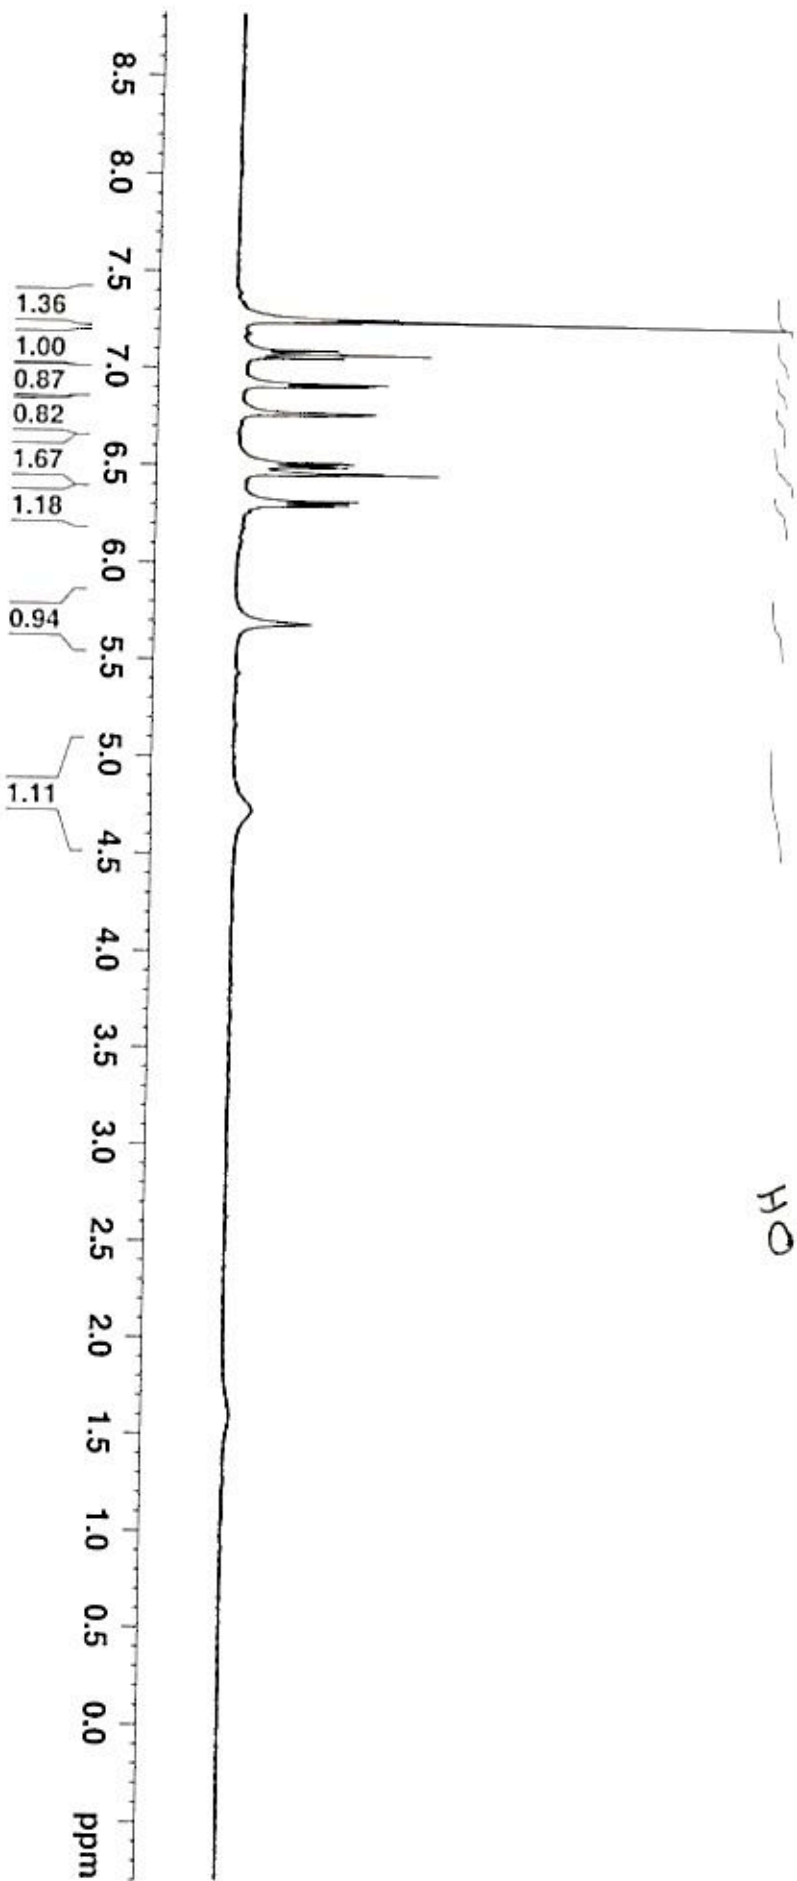

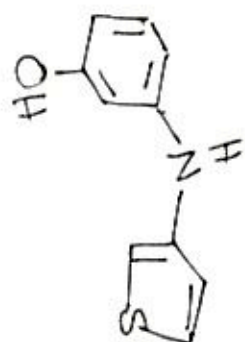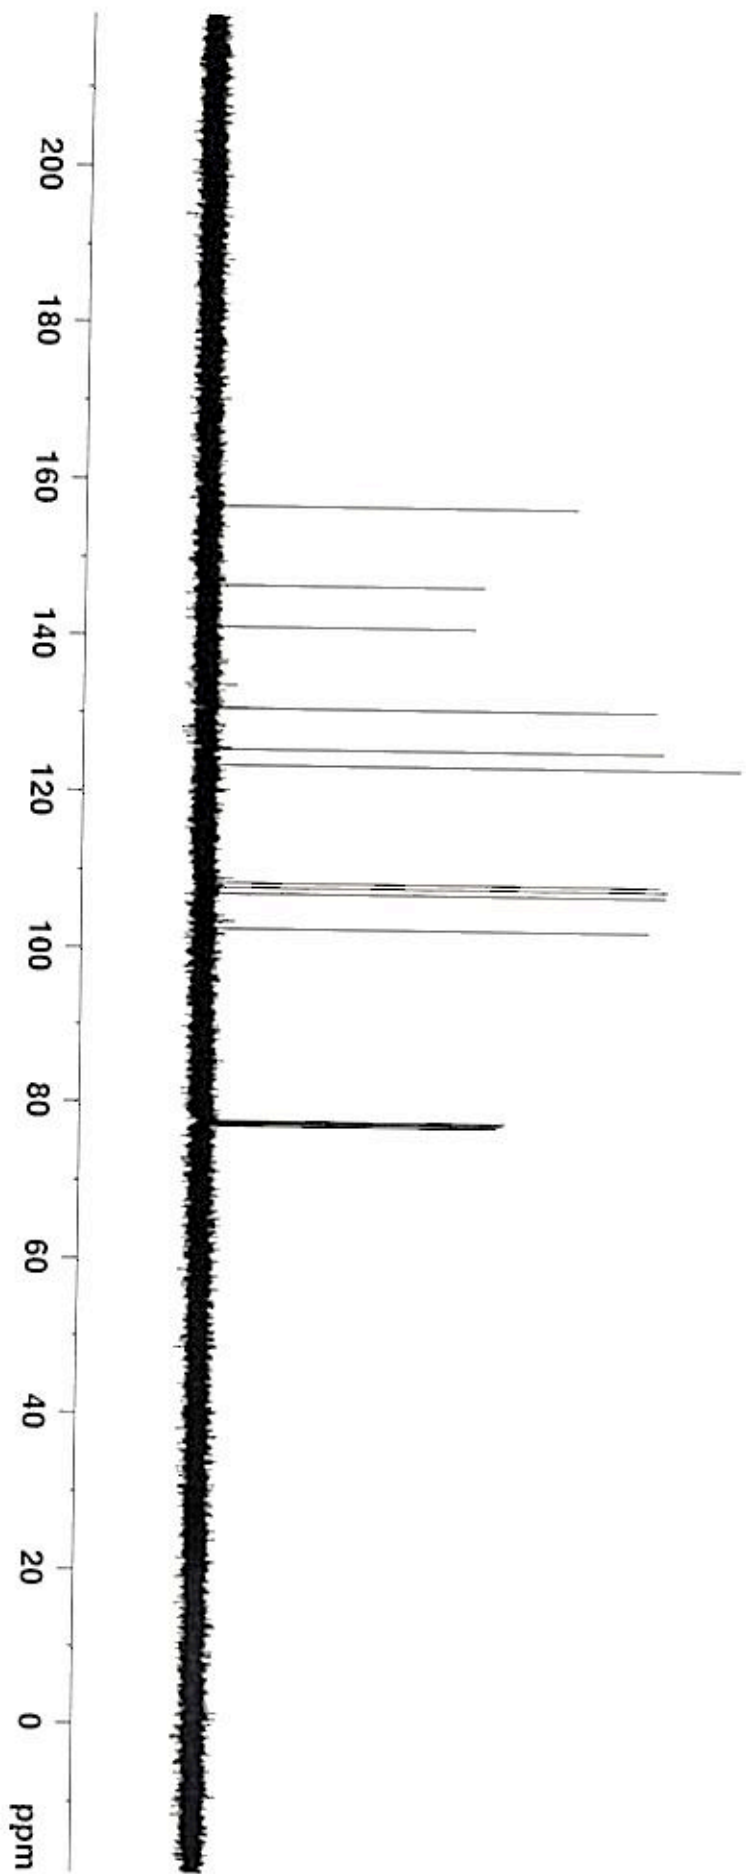

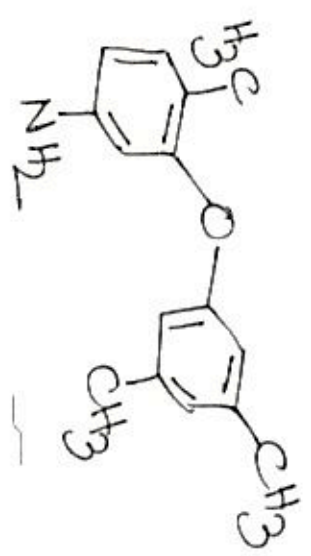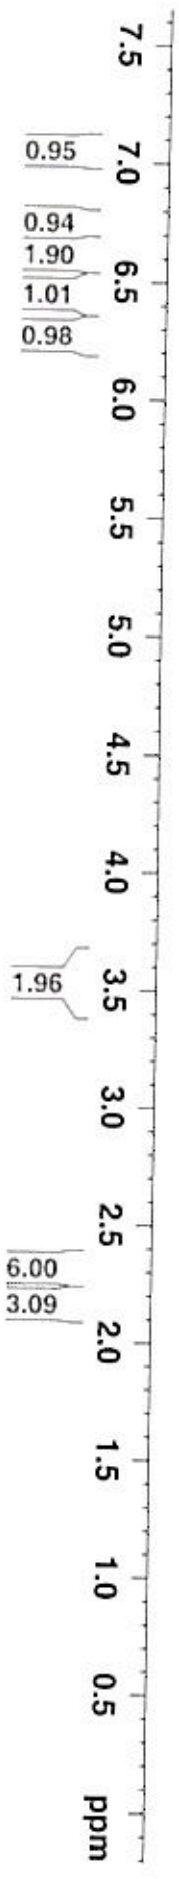

200  
180  
160  
140  
120  
100  
80  
60  
40  
20  
0  
ppm

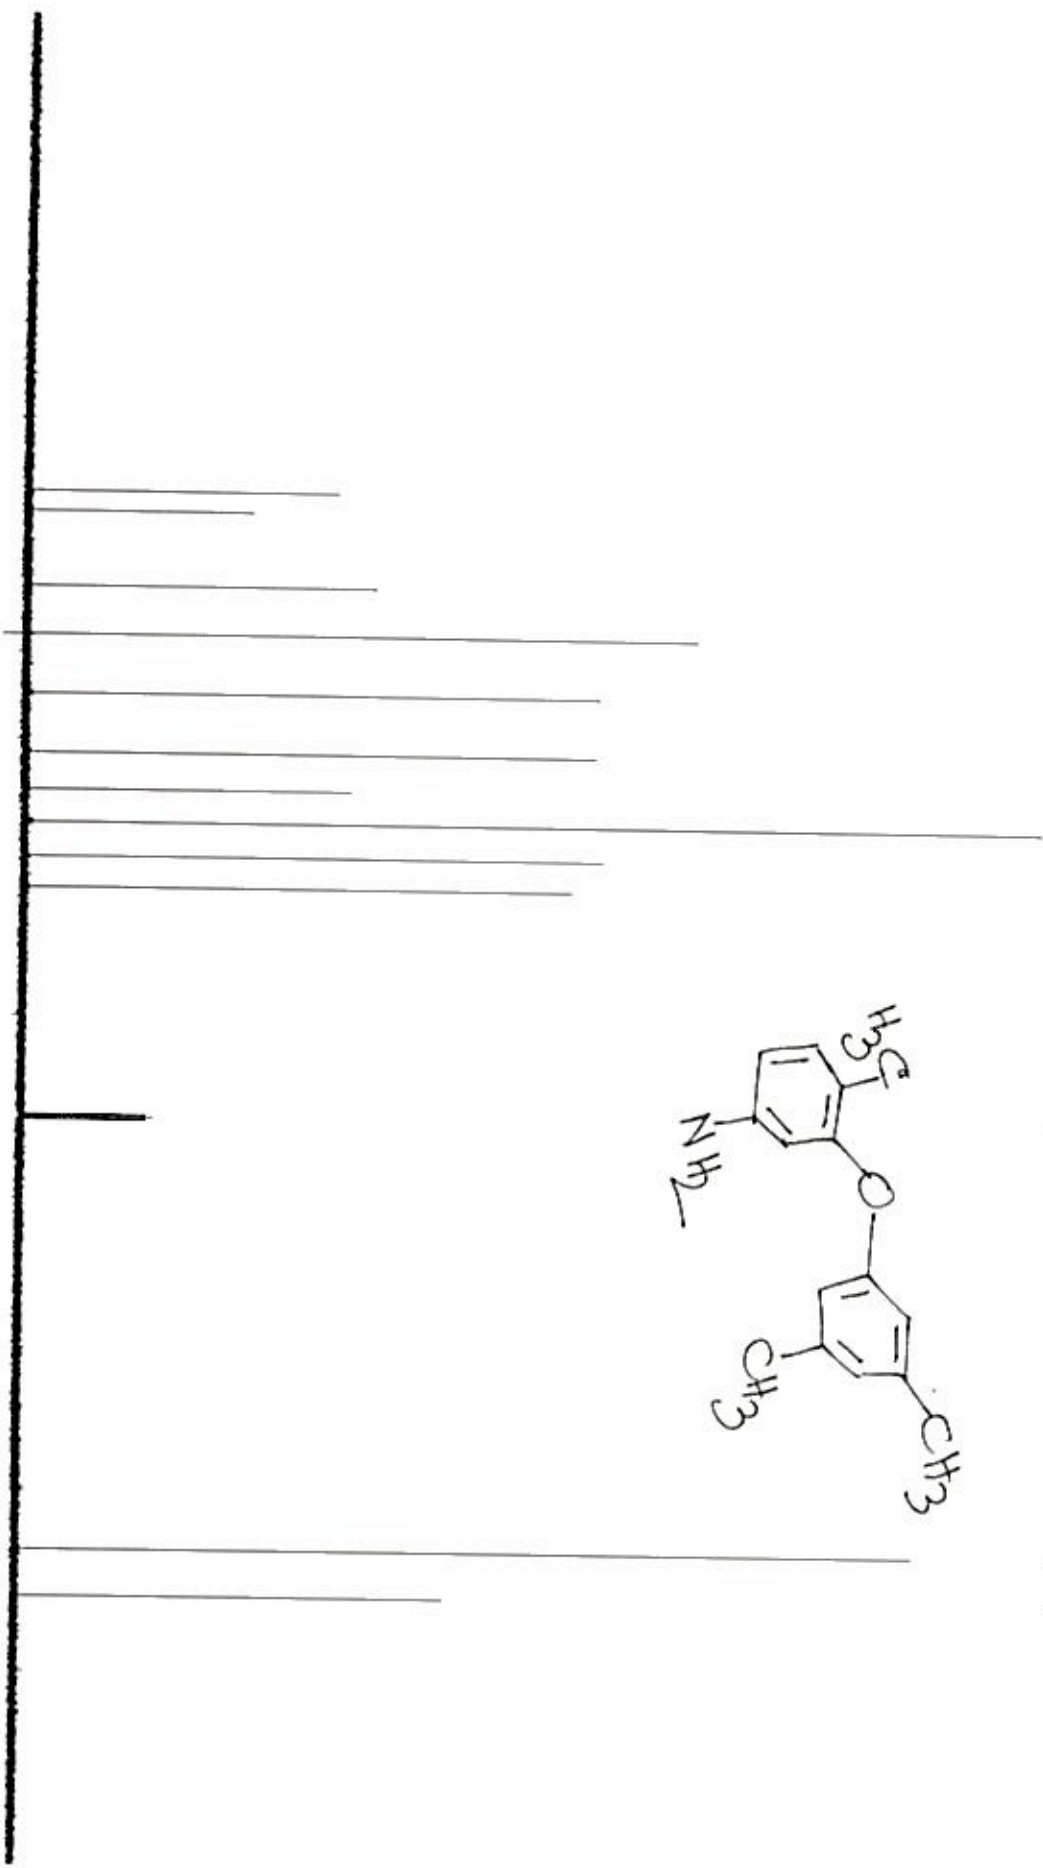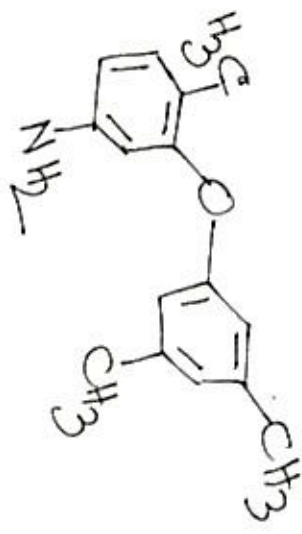

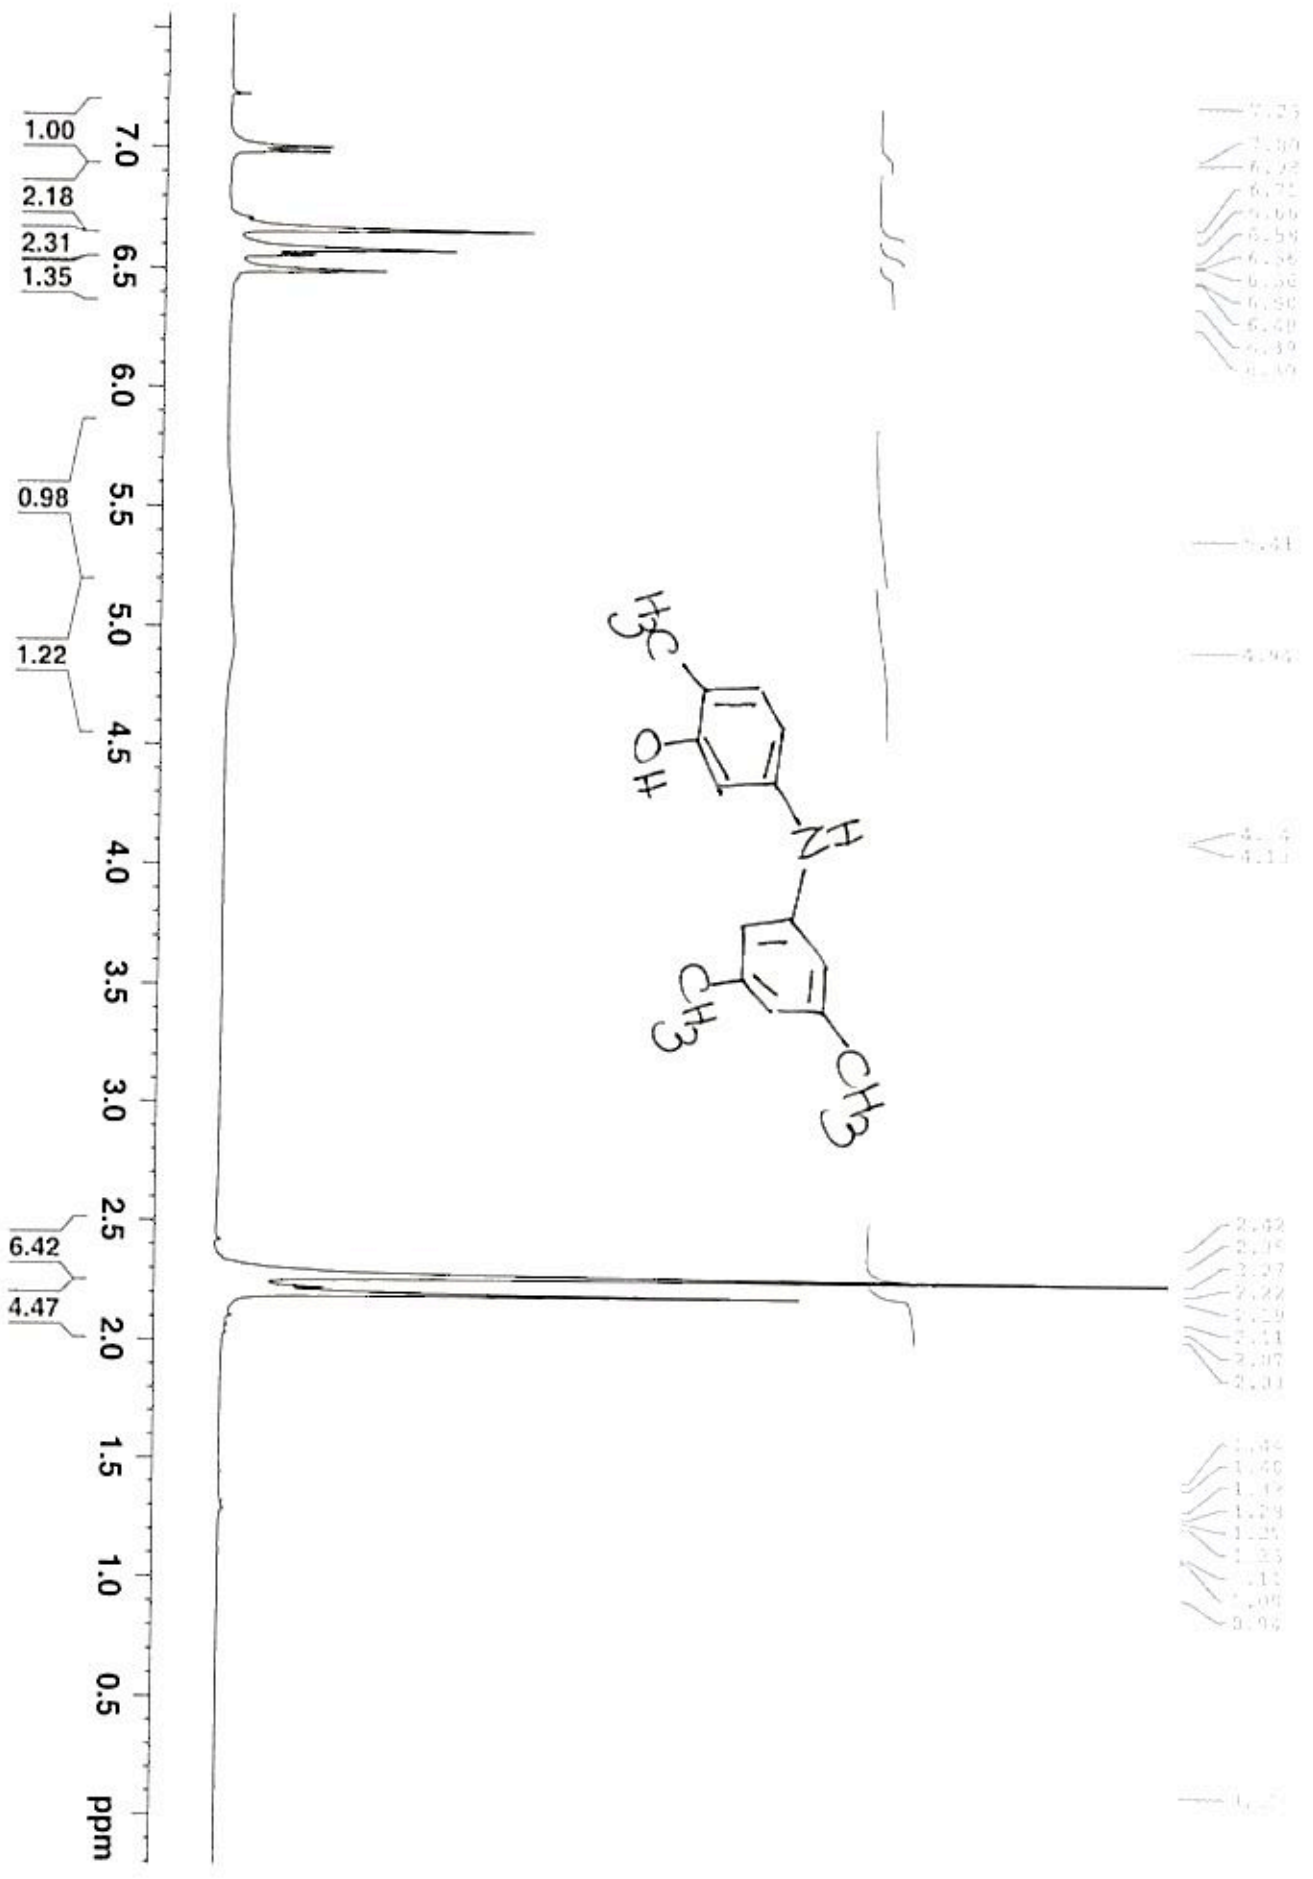



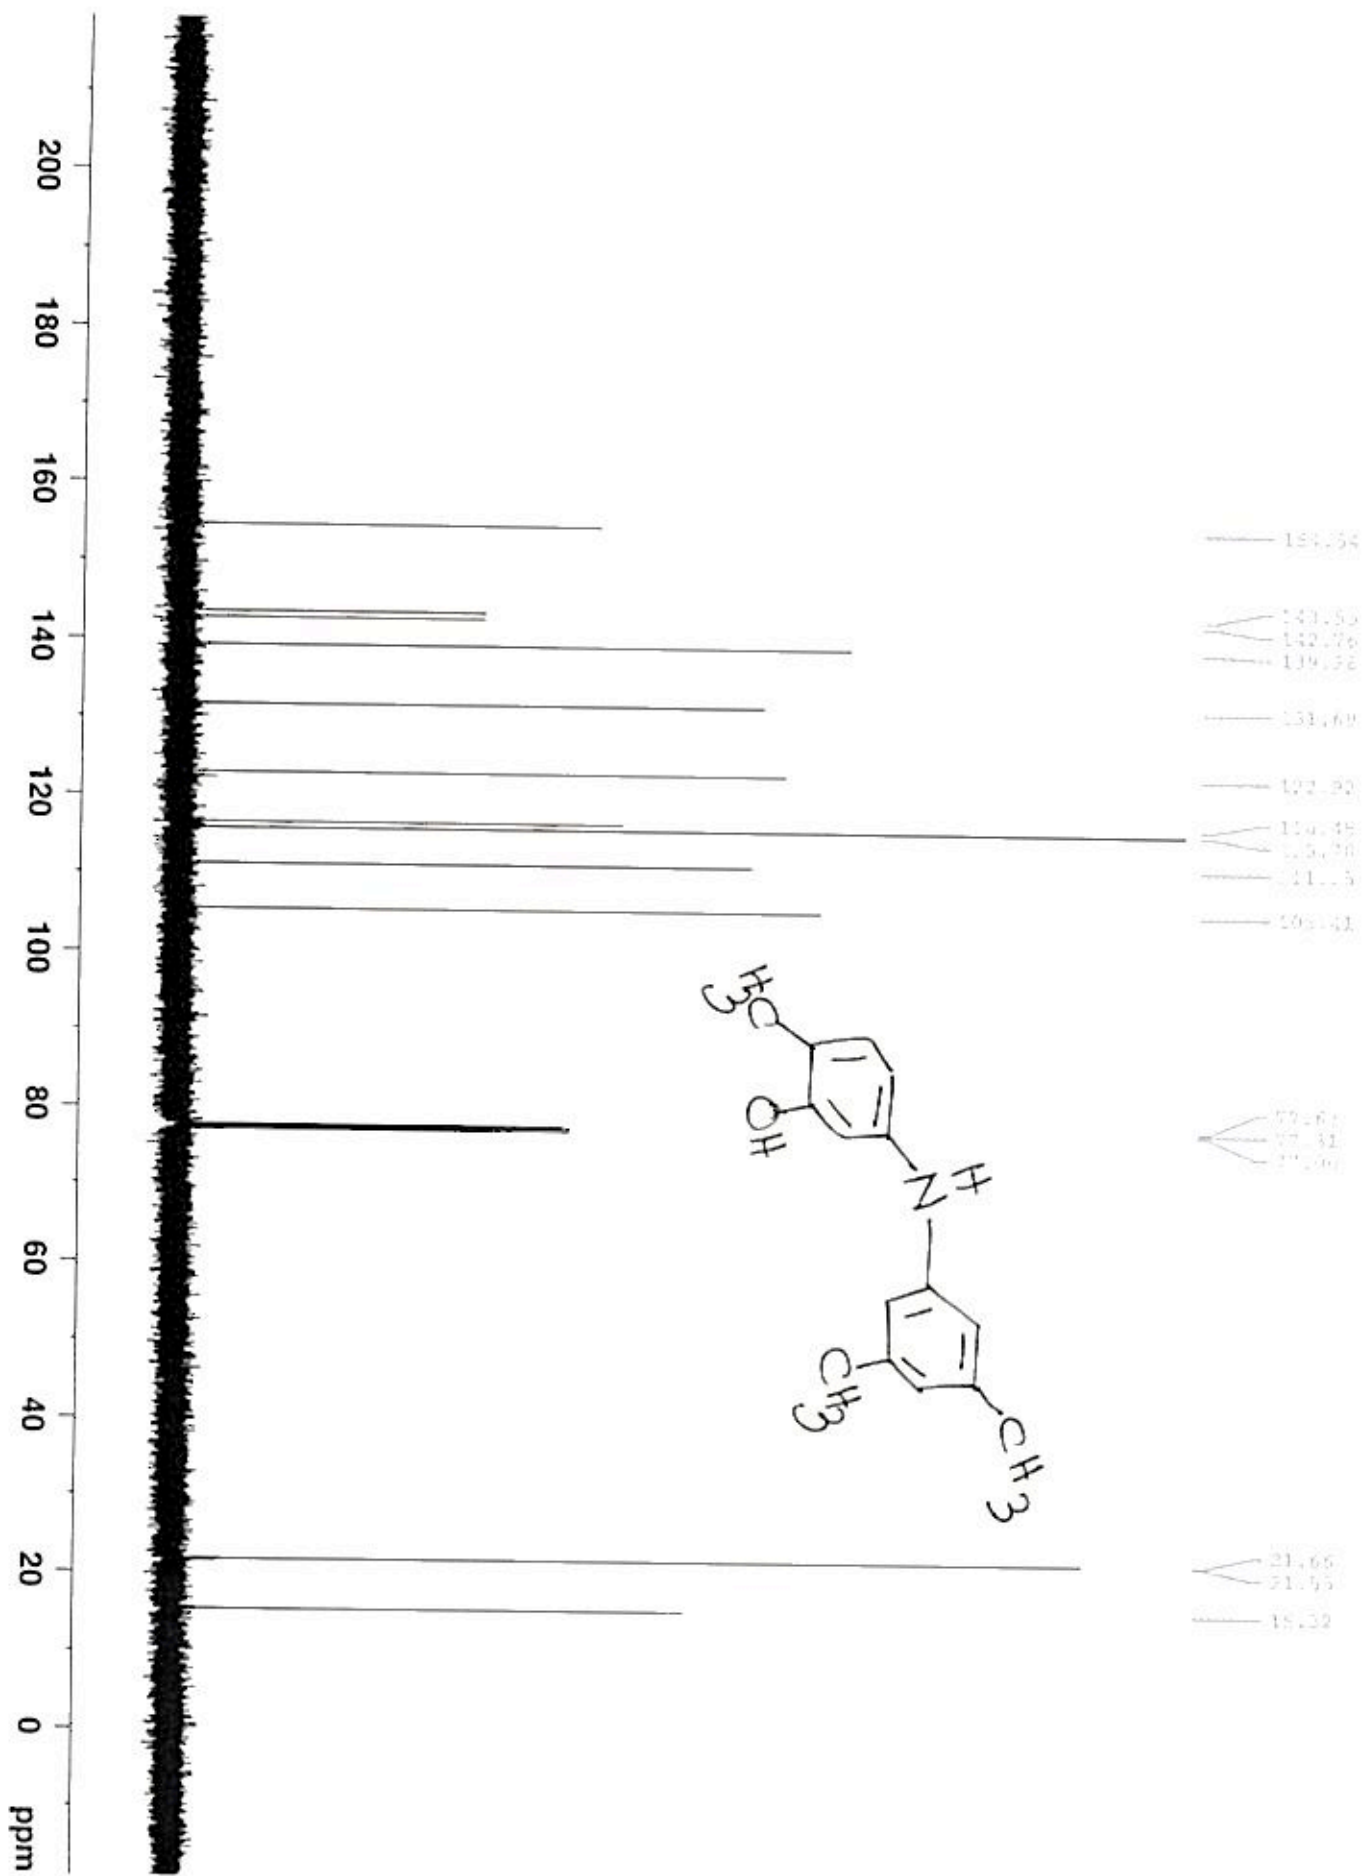

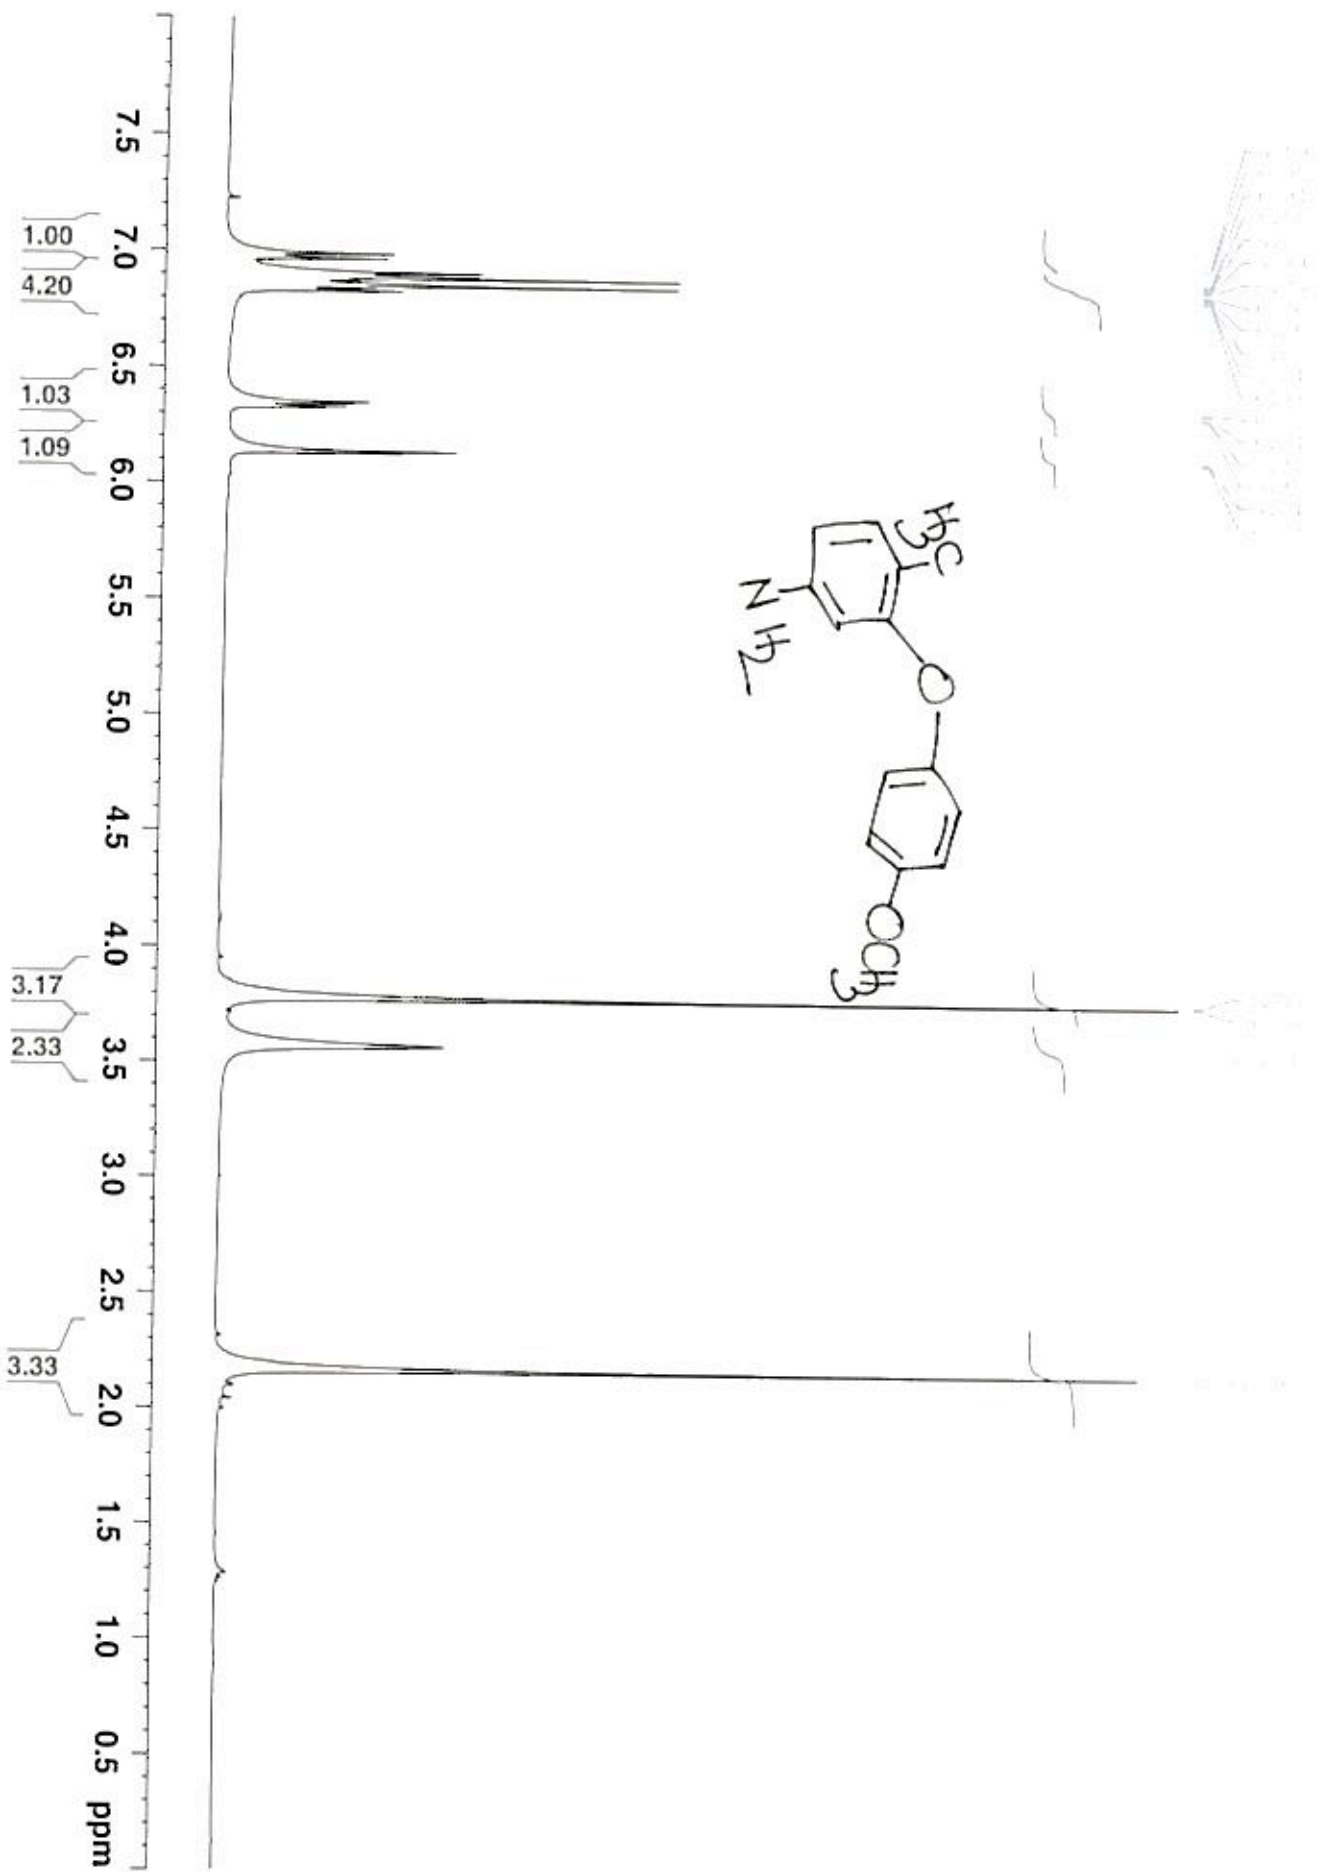

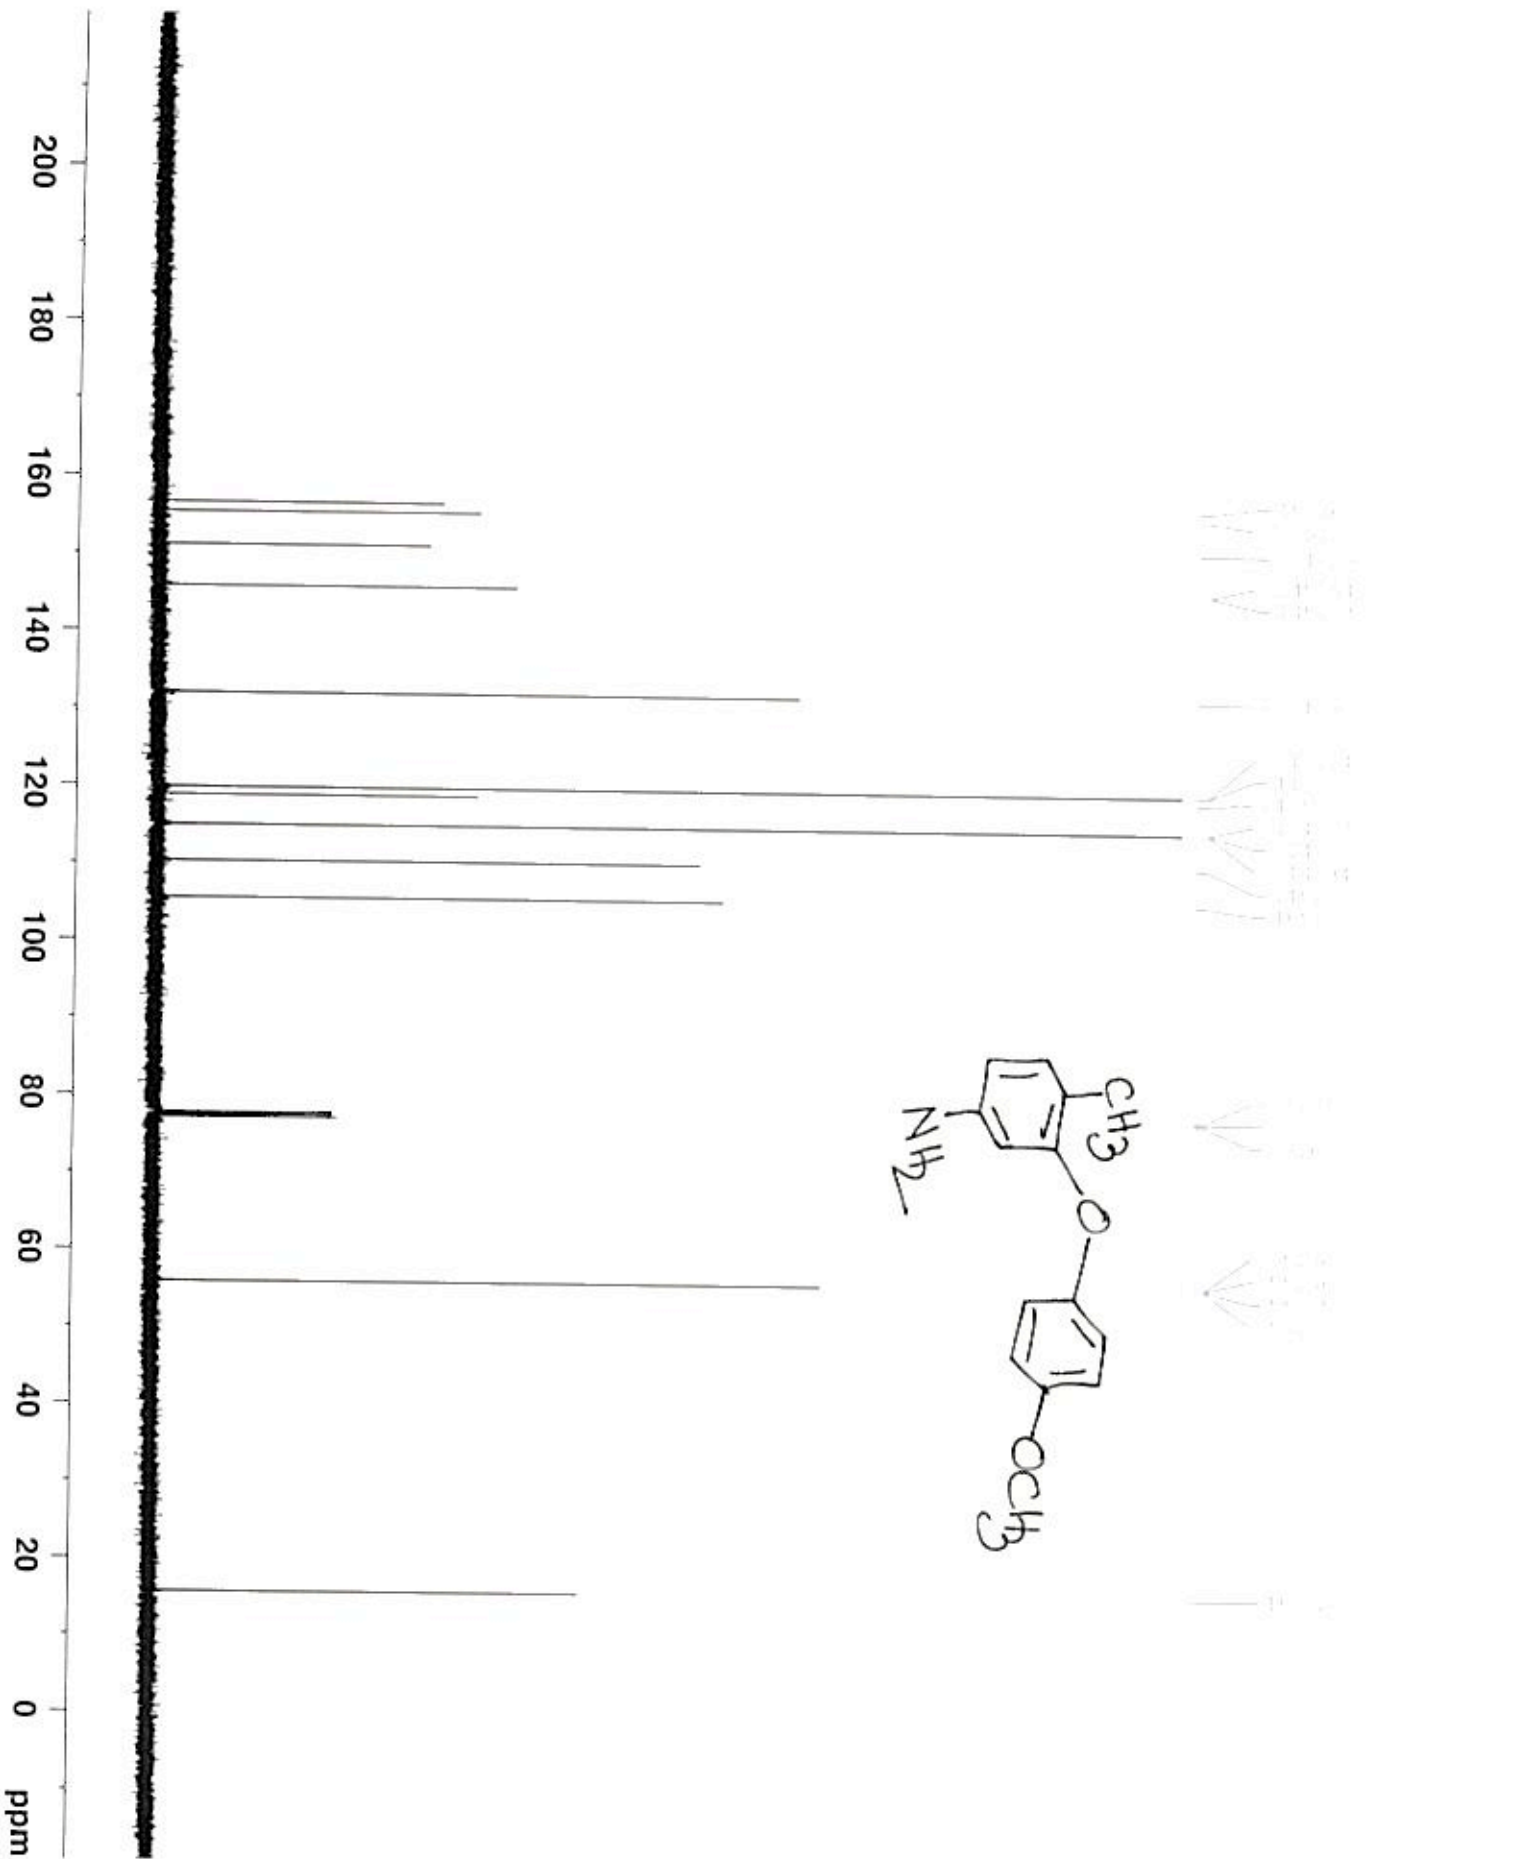

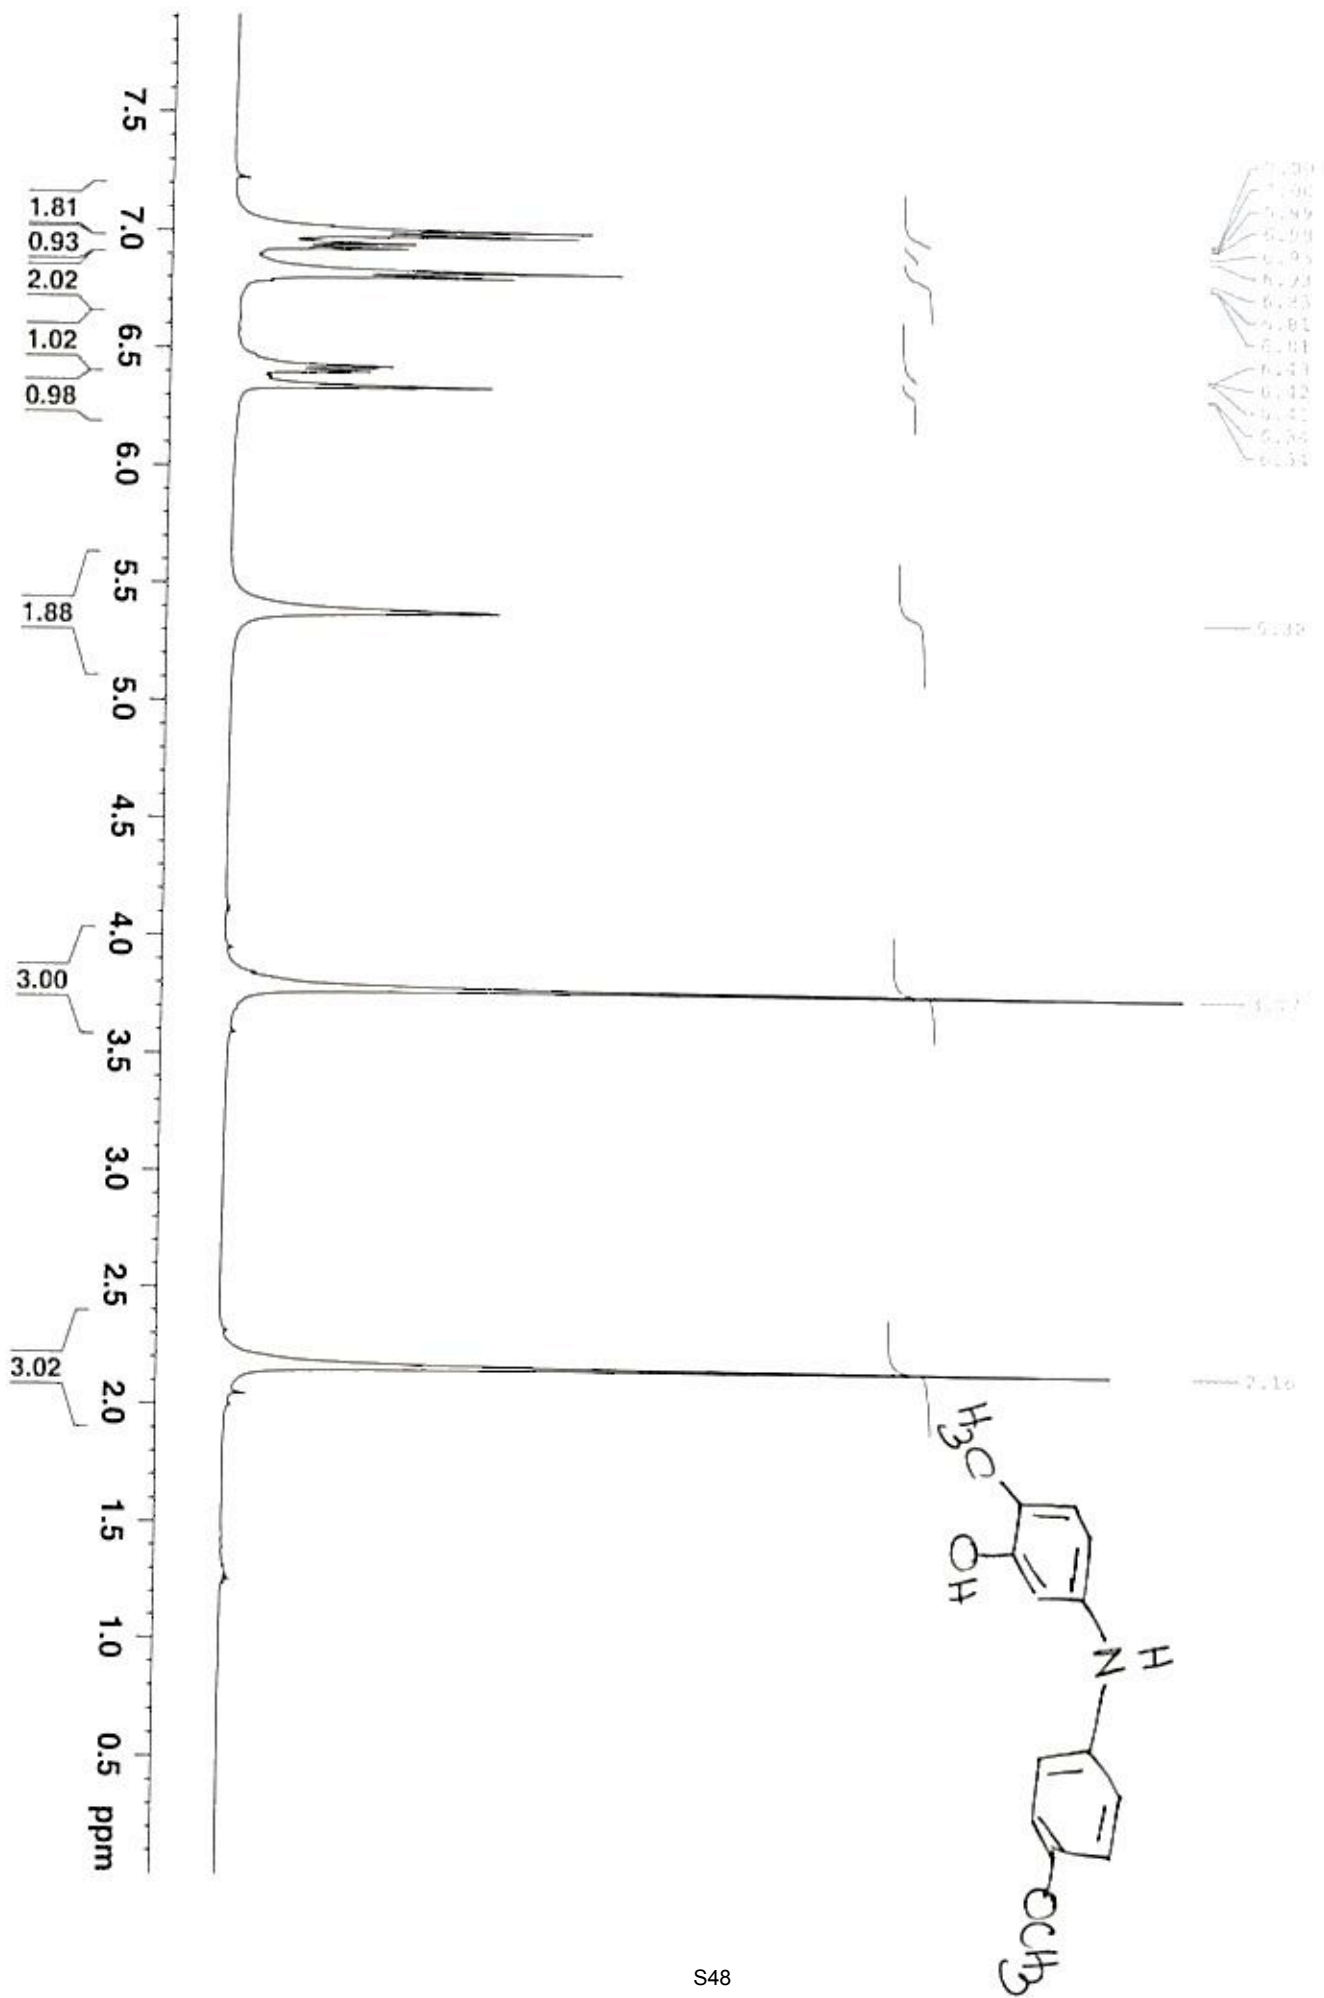

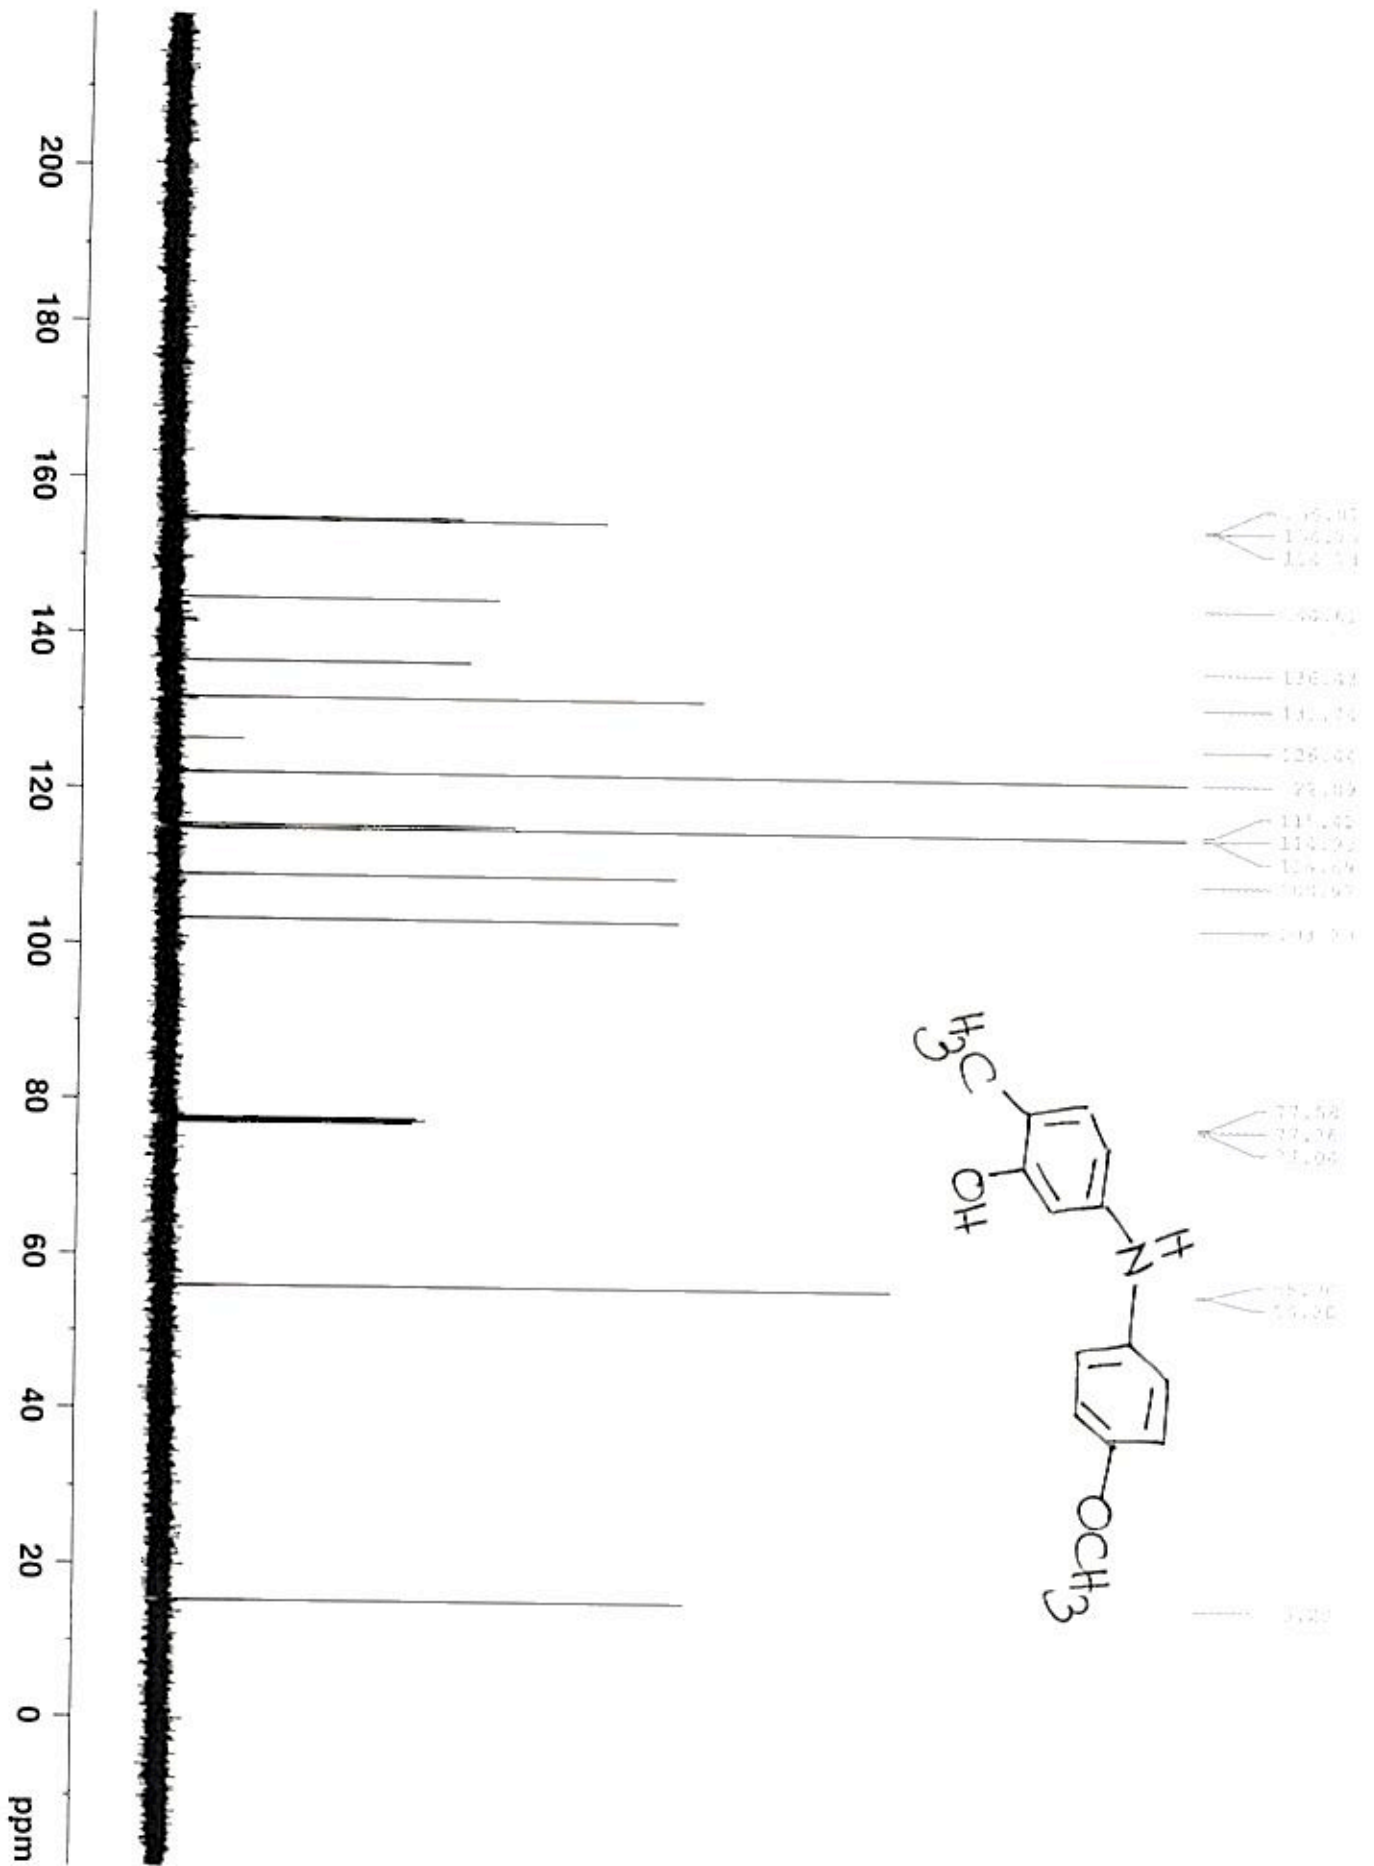

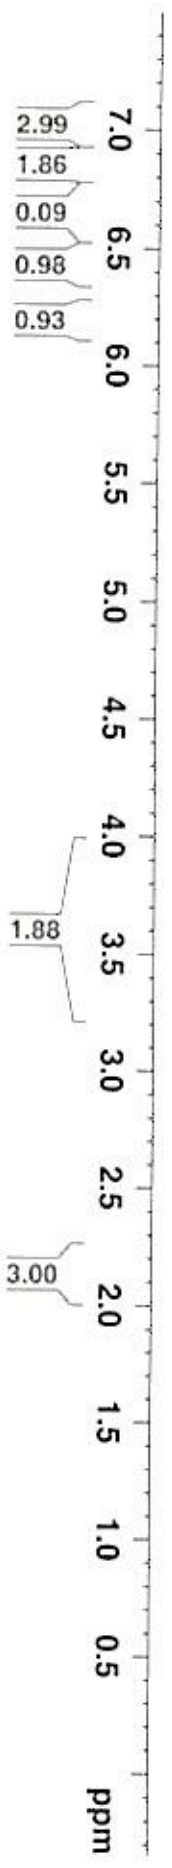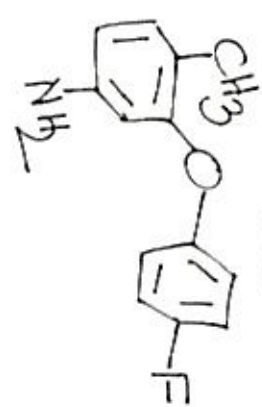

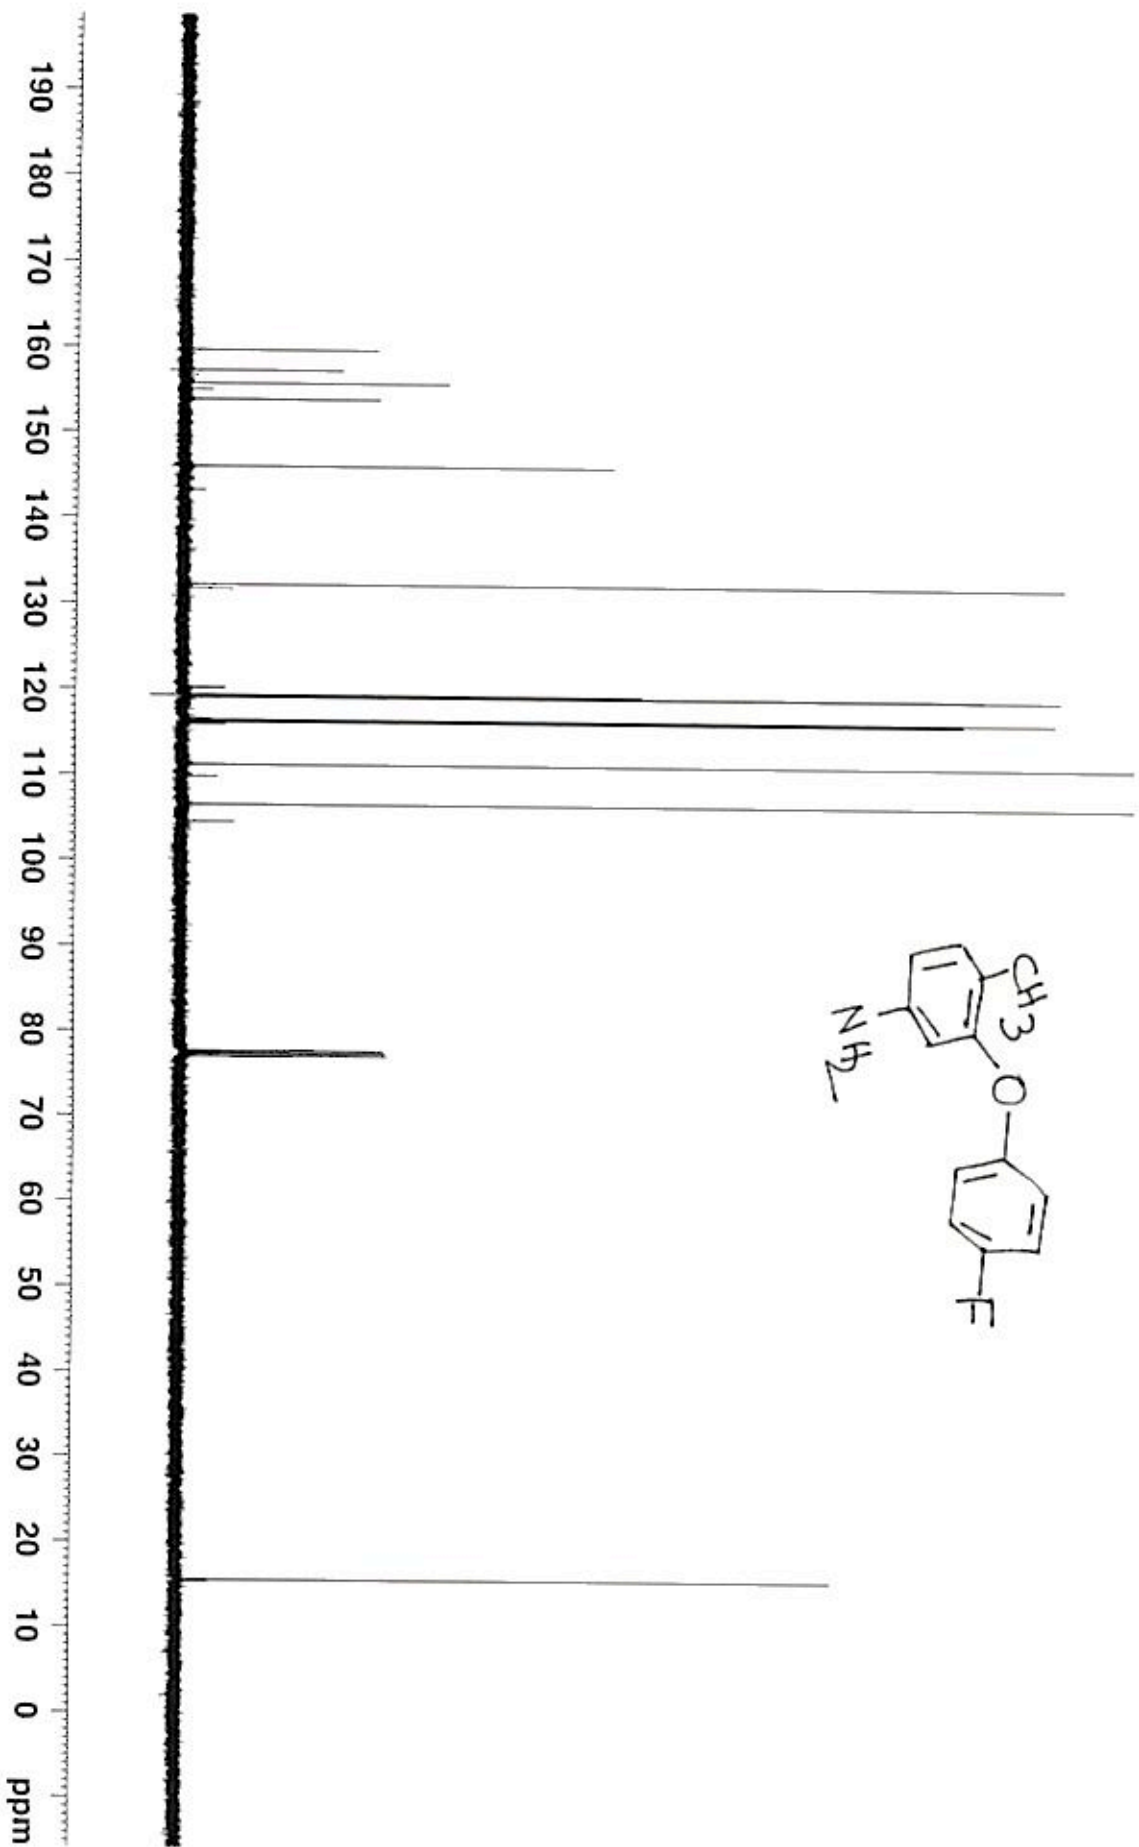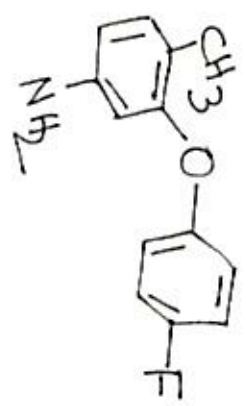





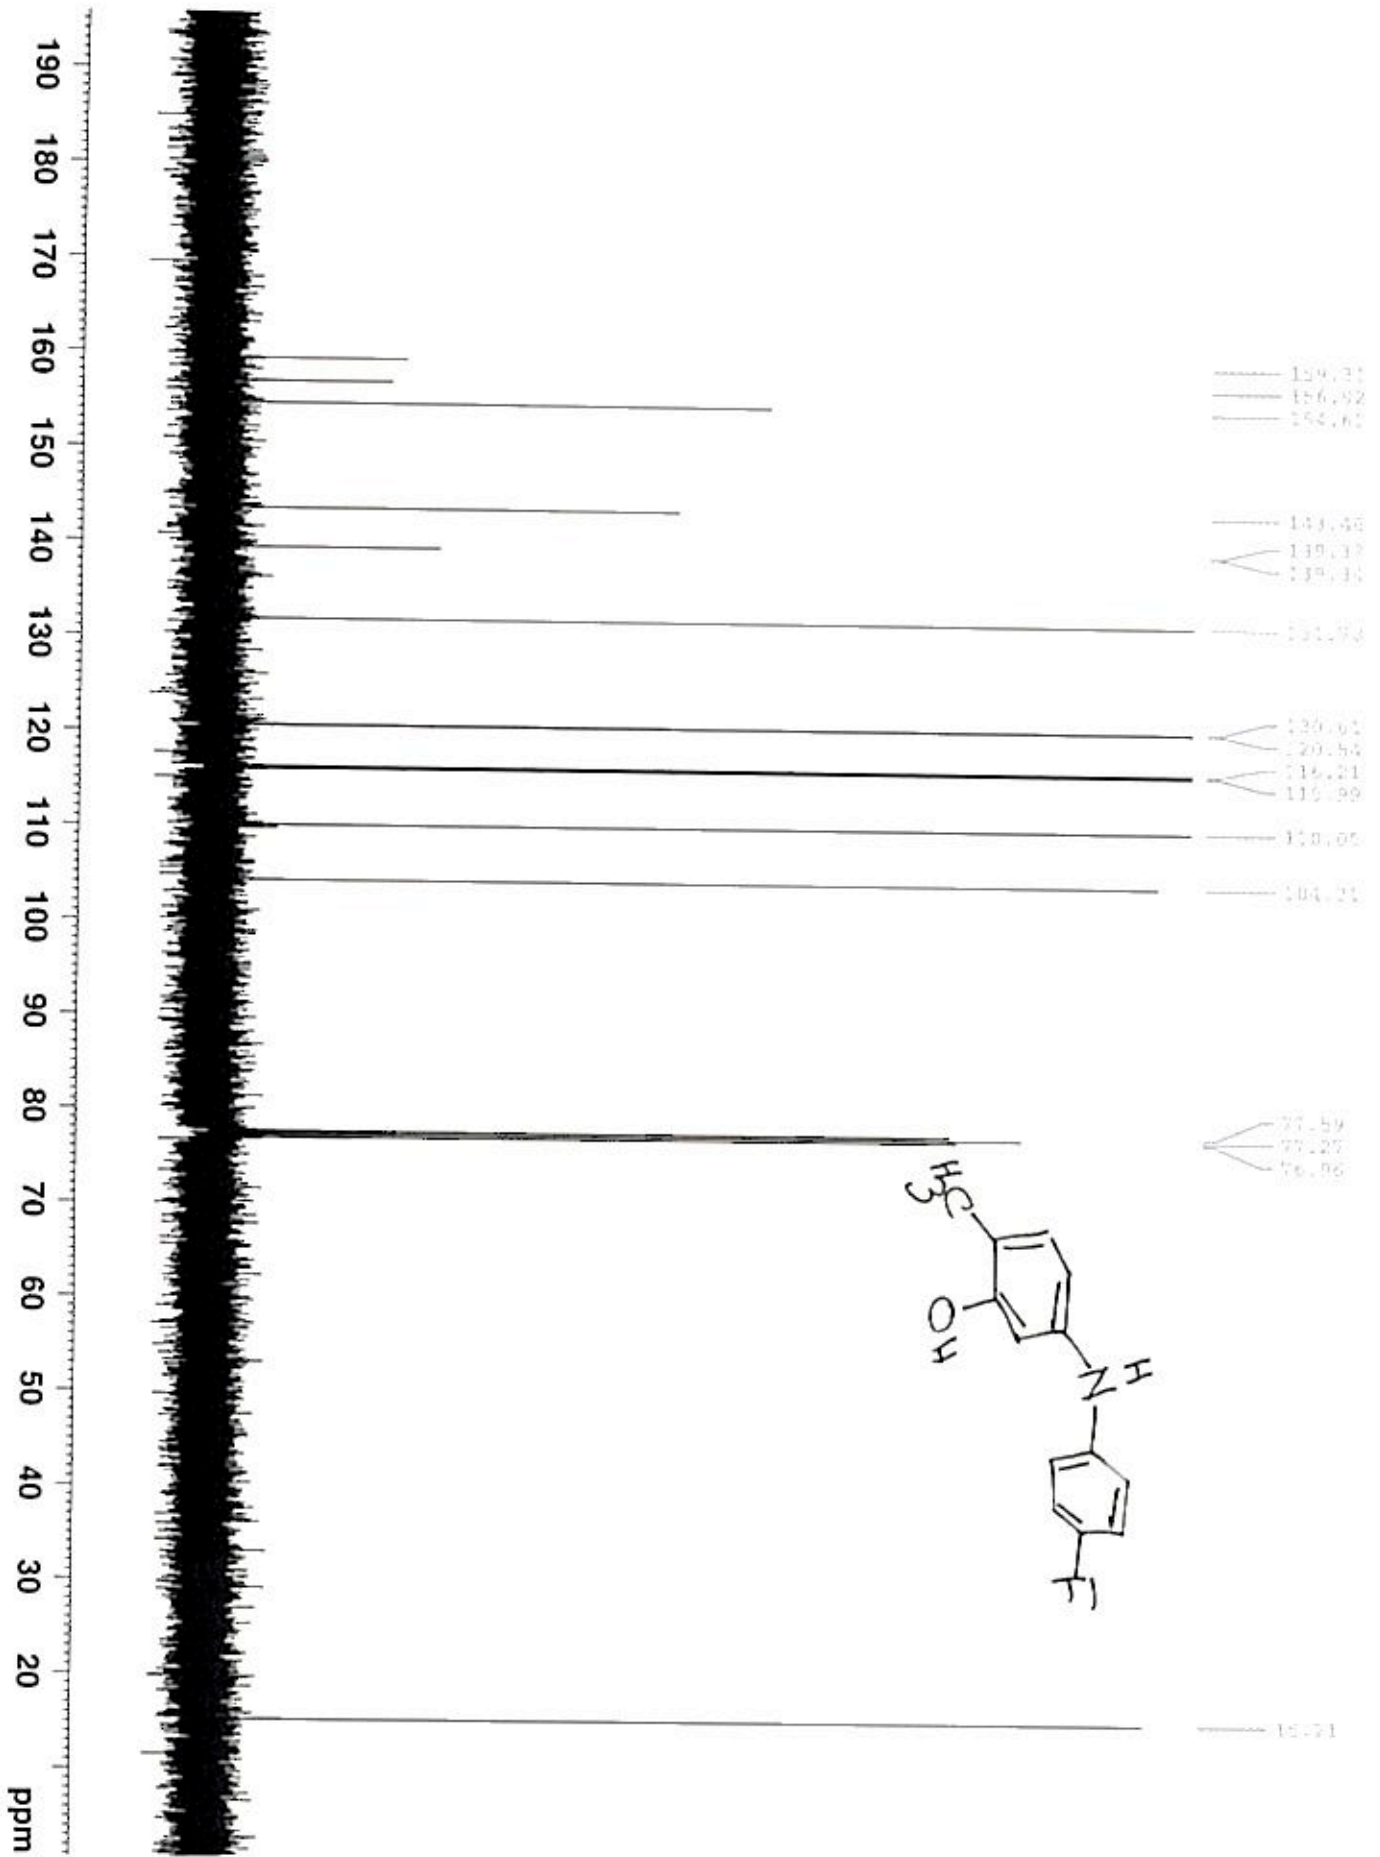

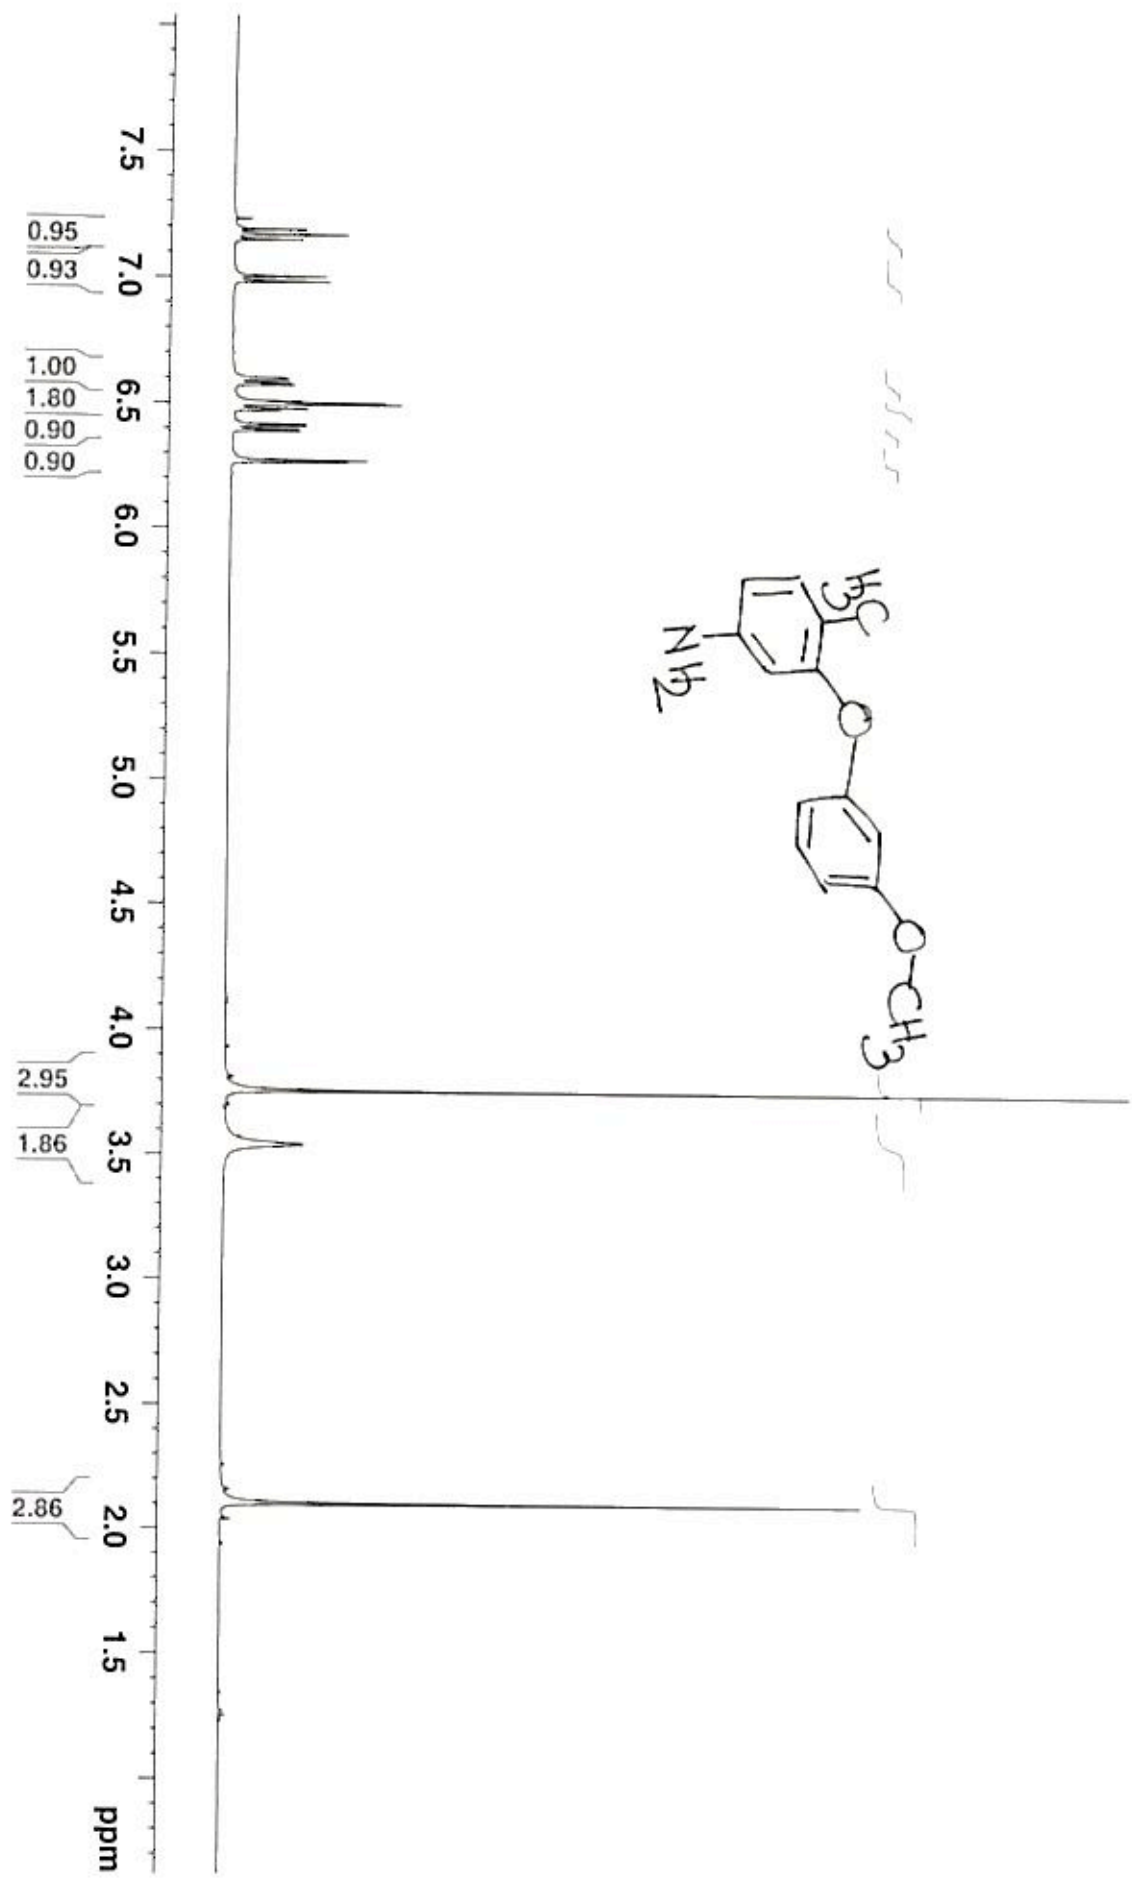

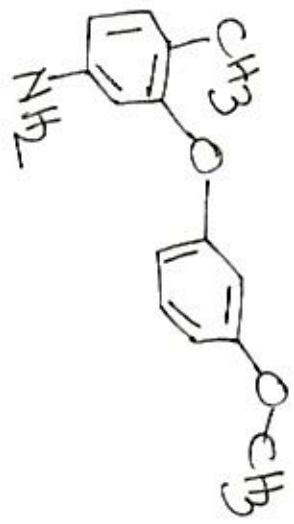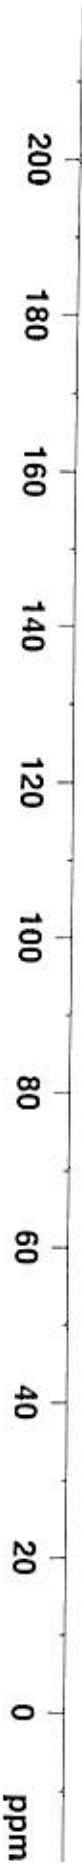

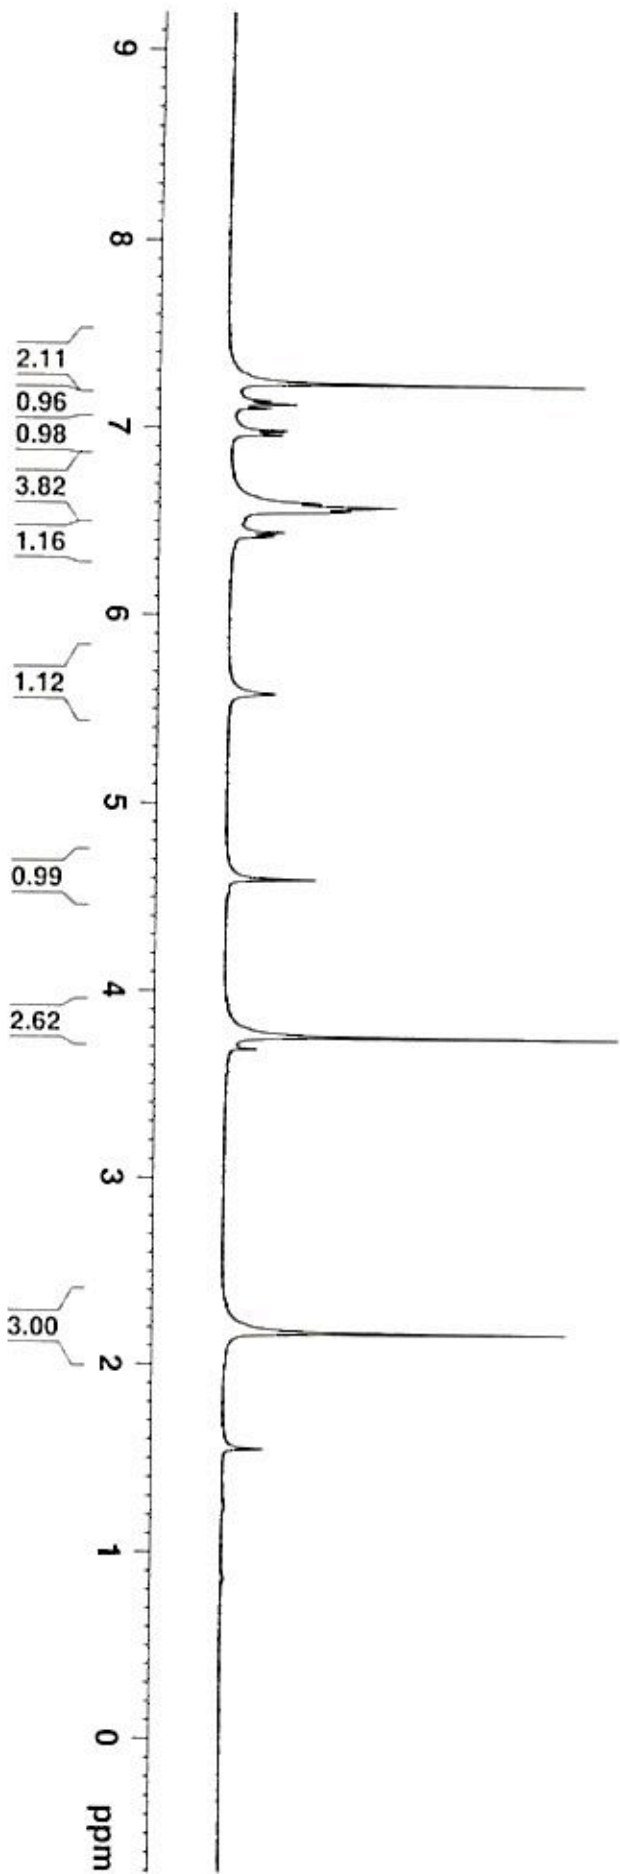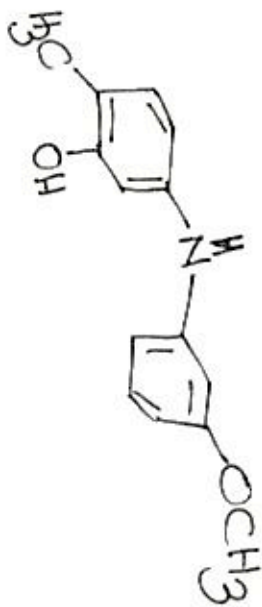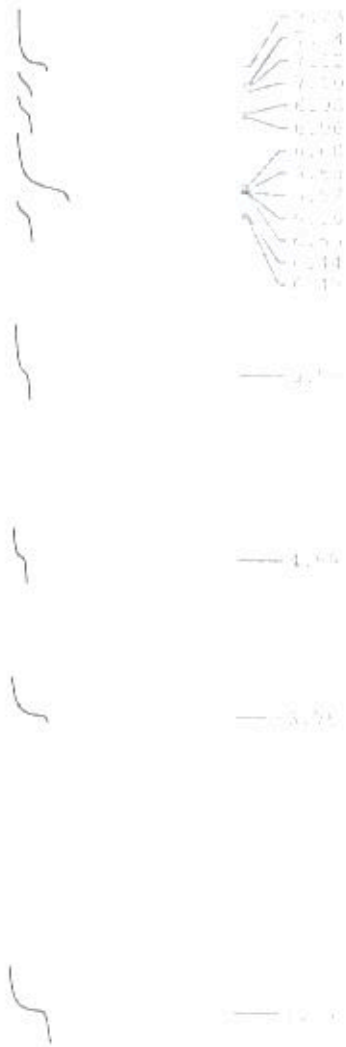

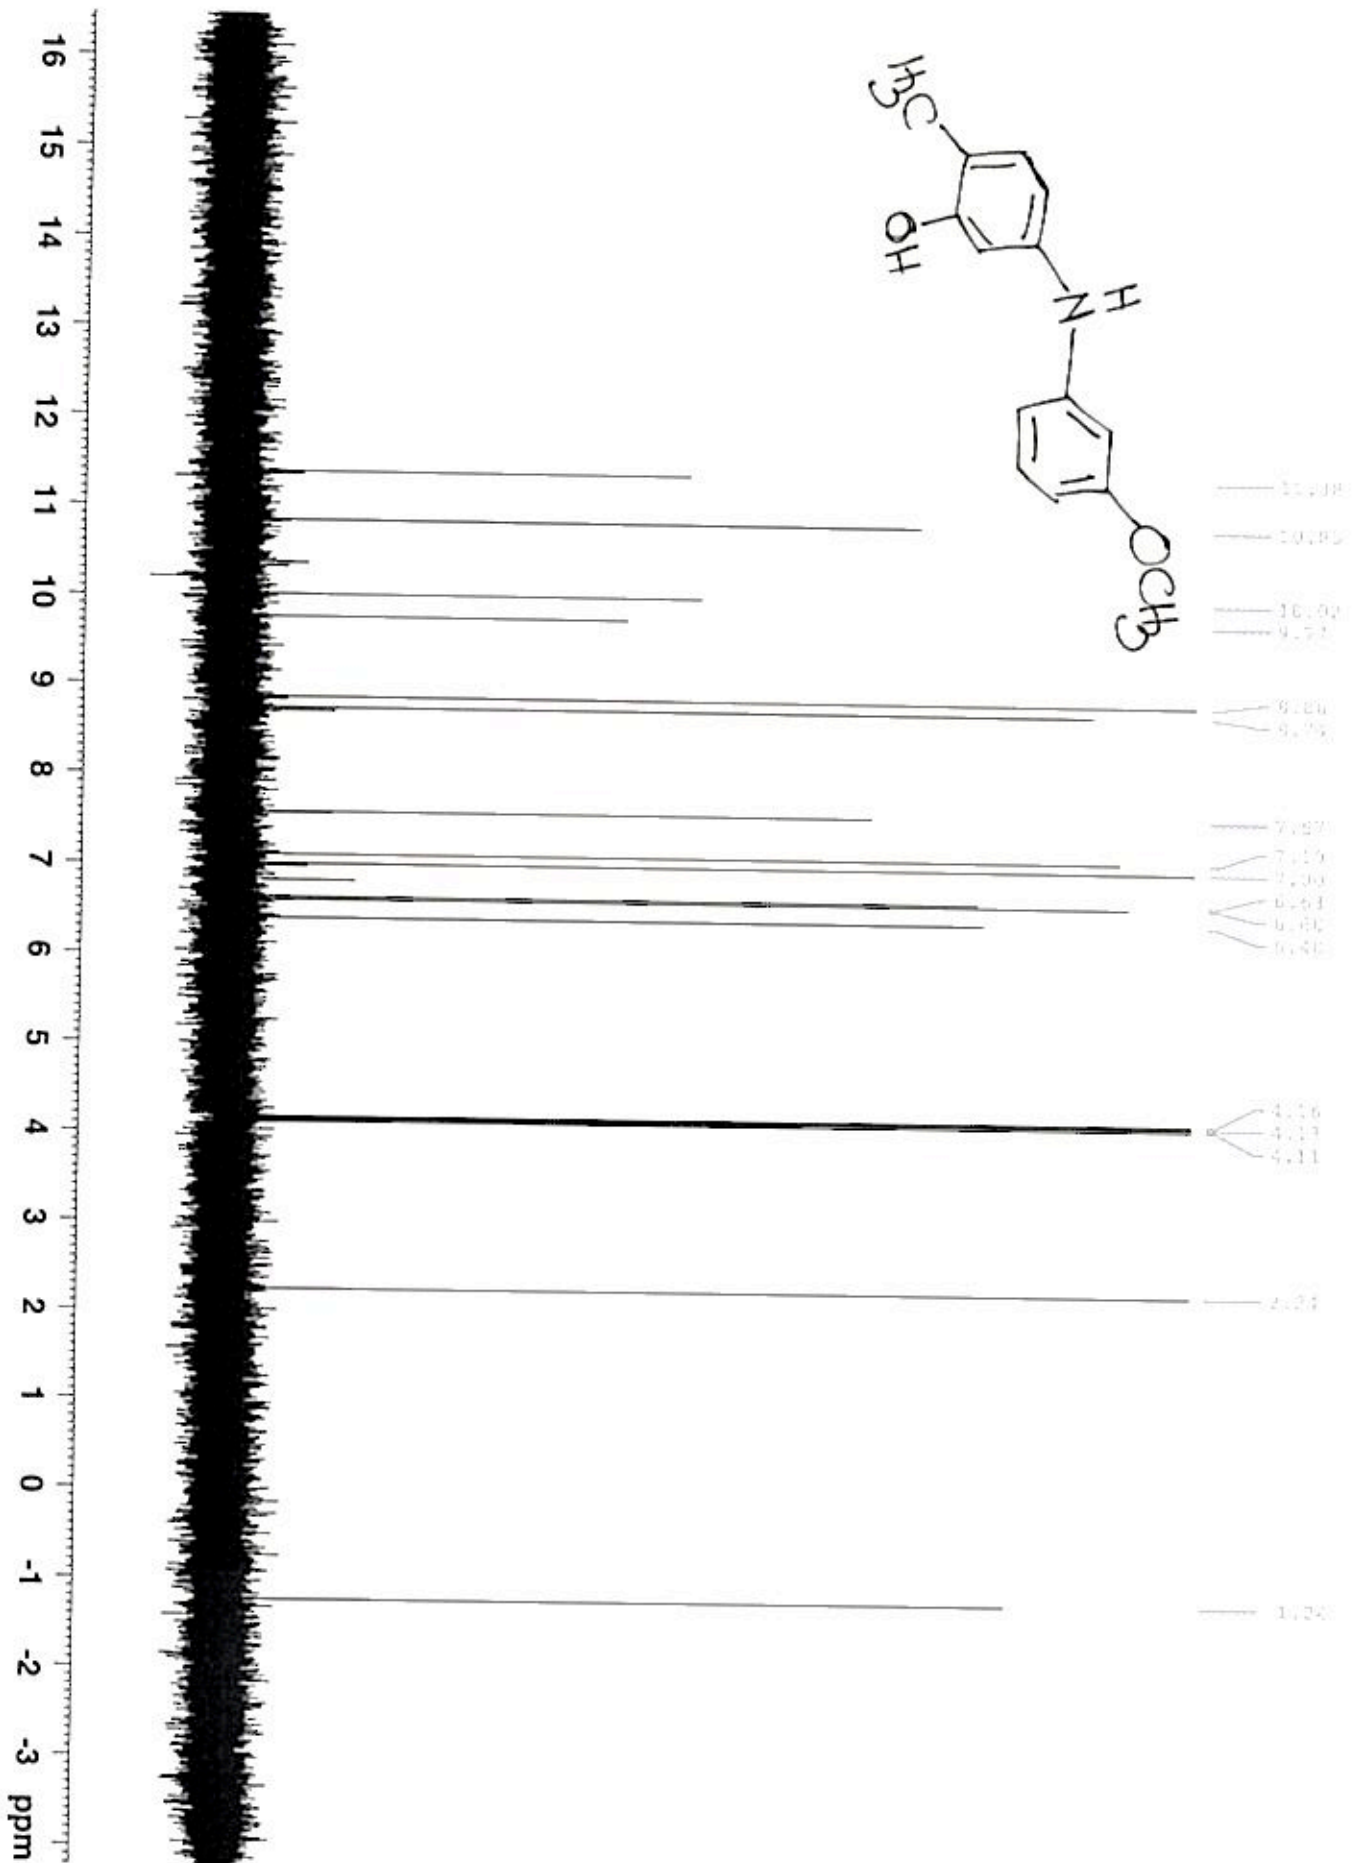

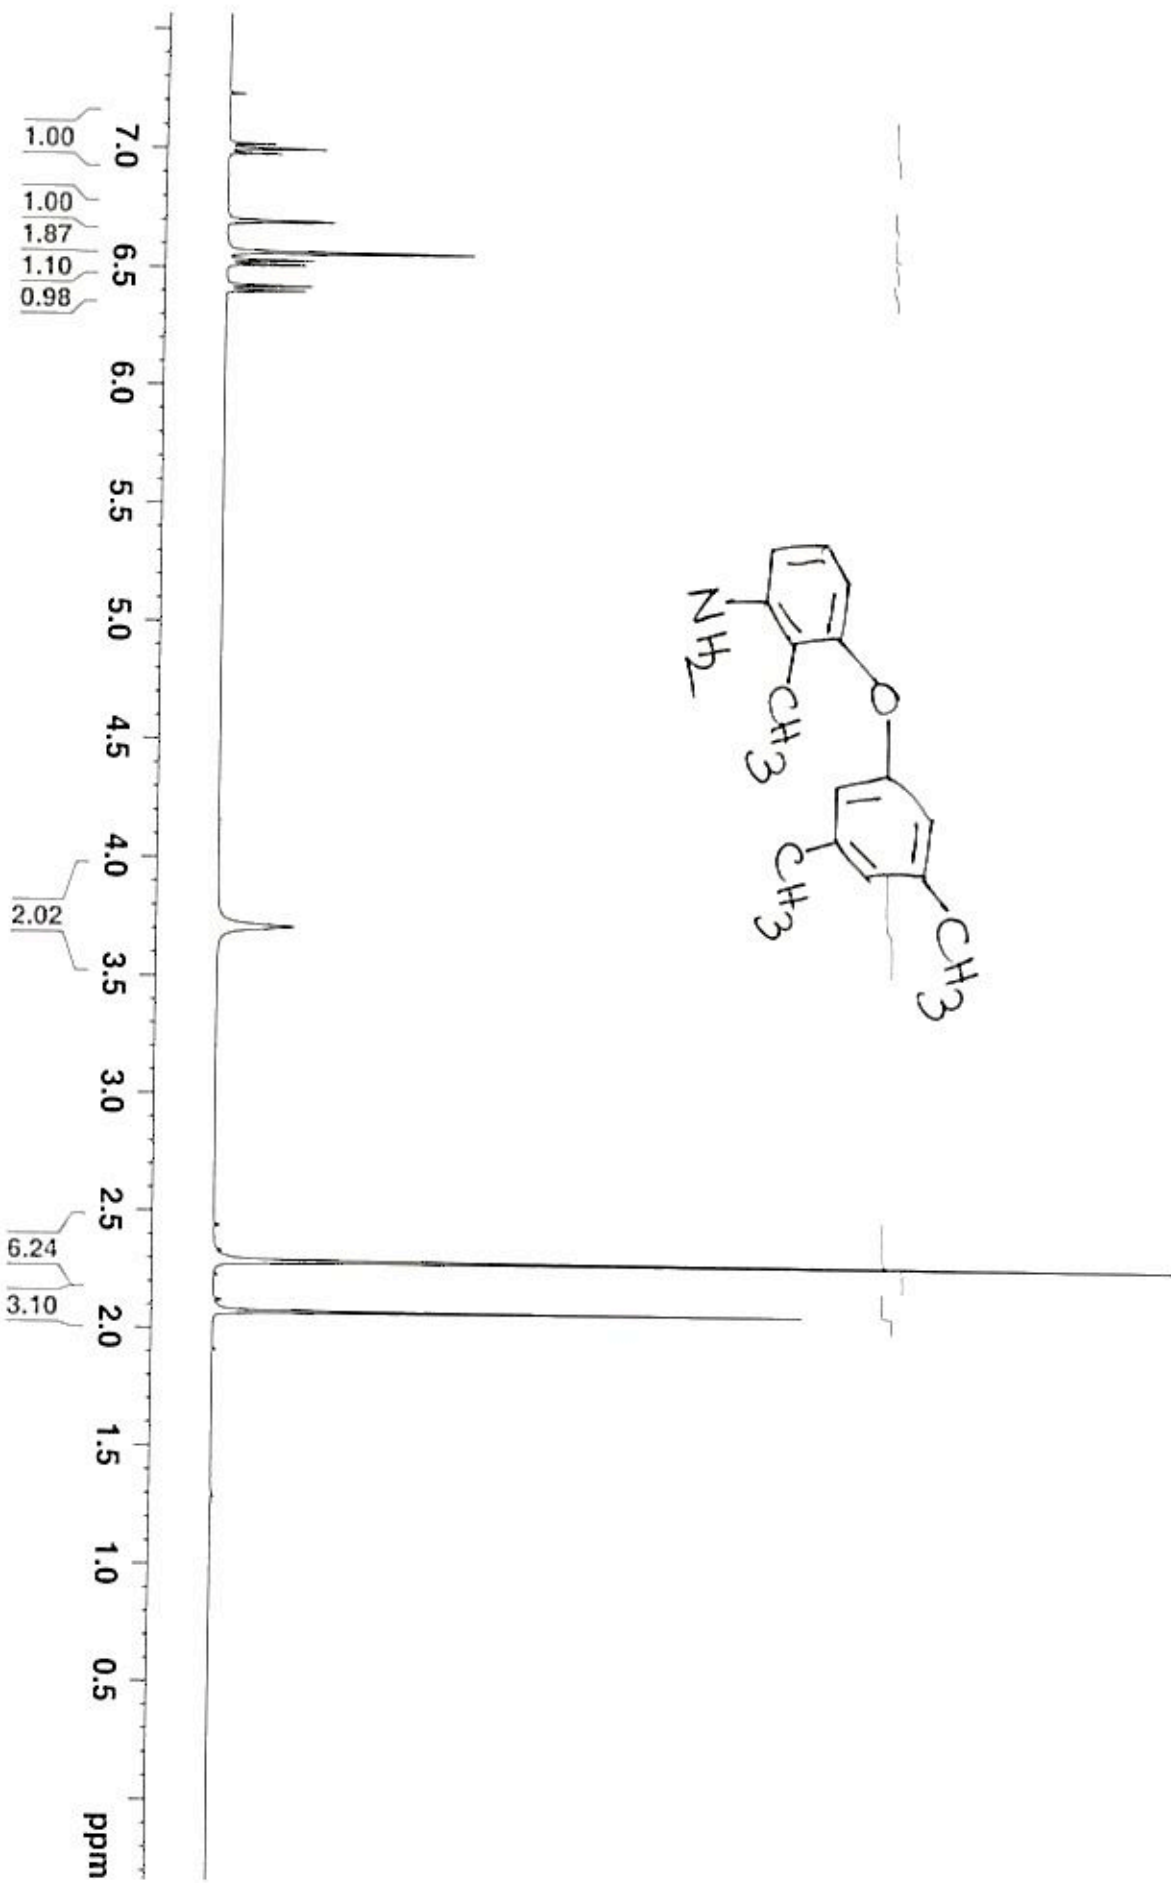

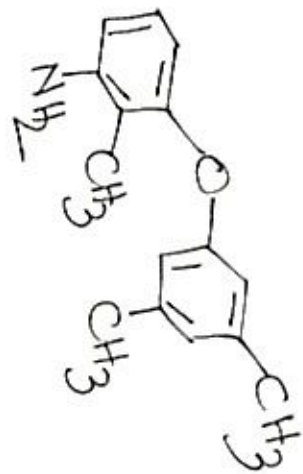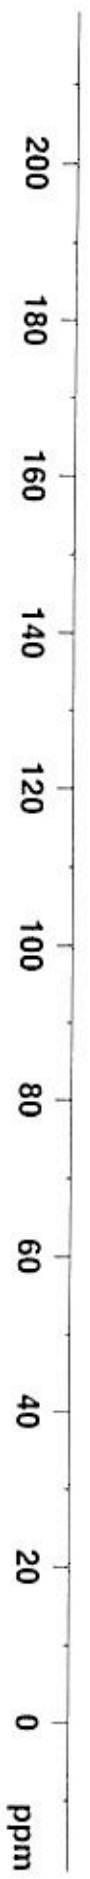

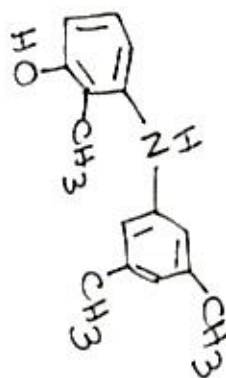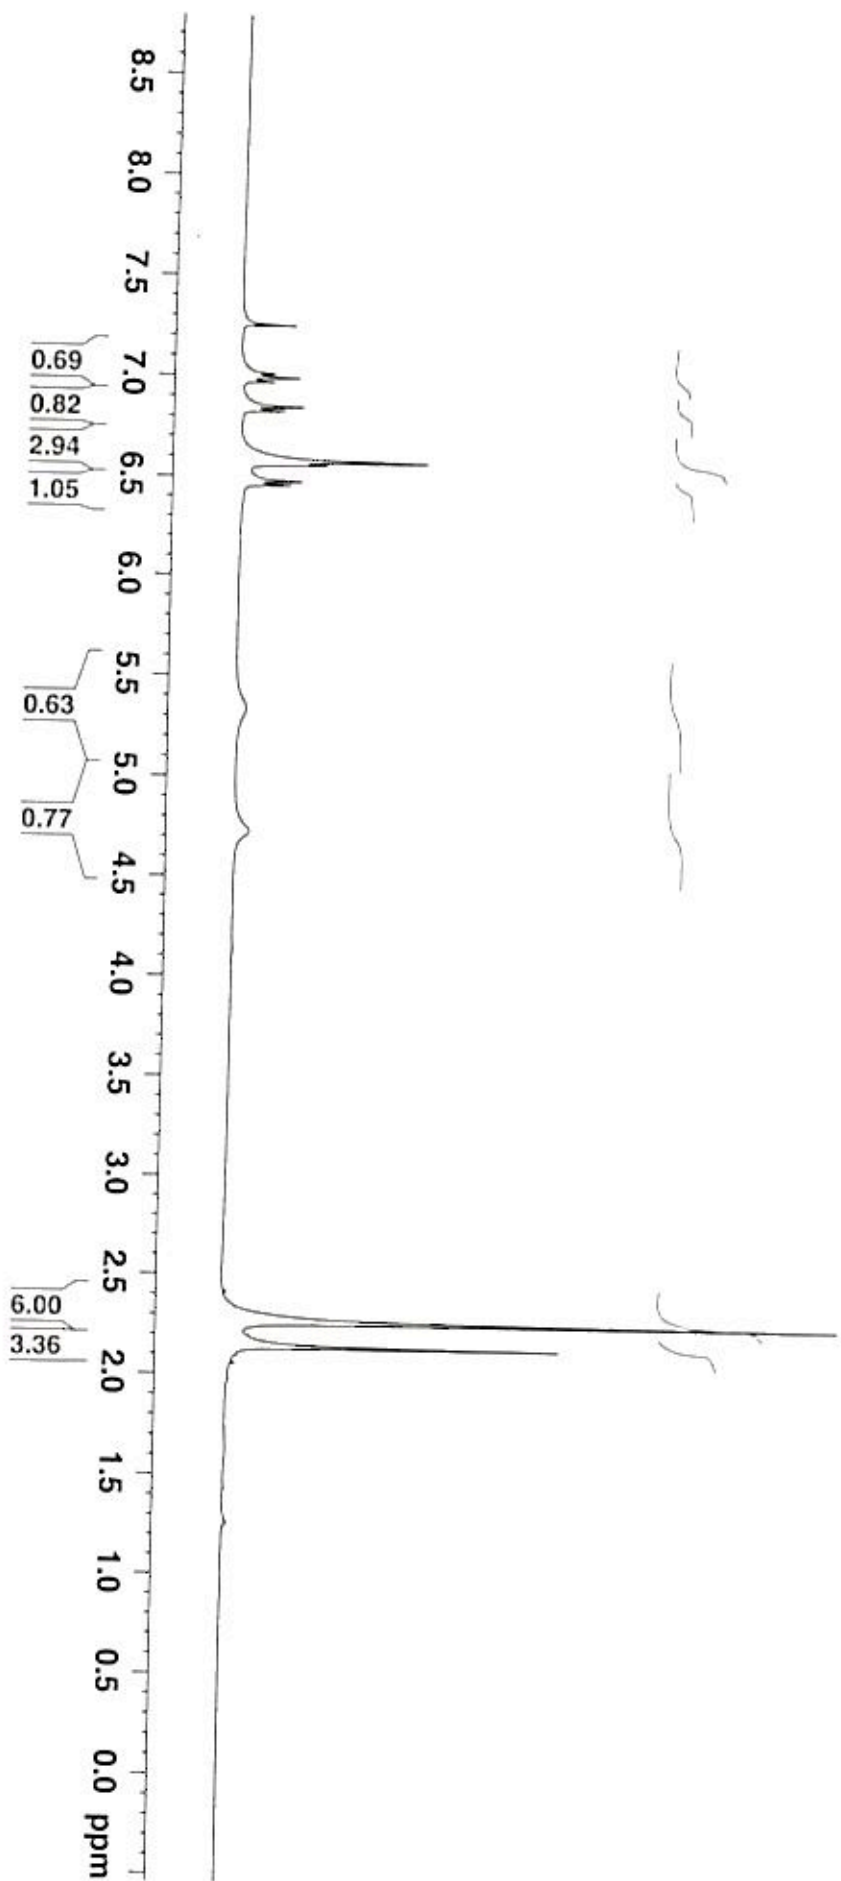



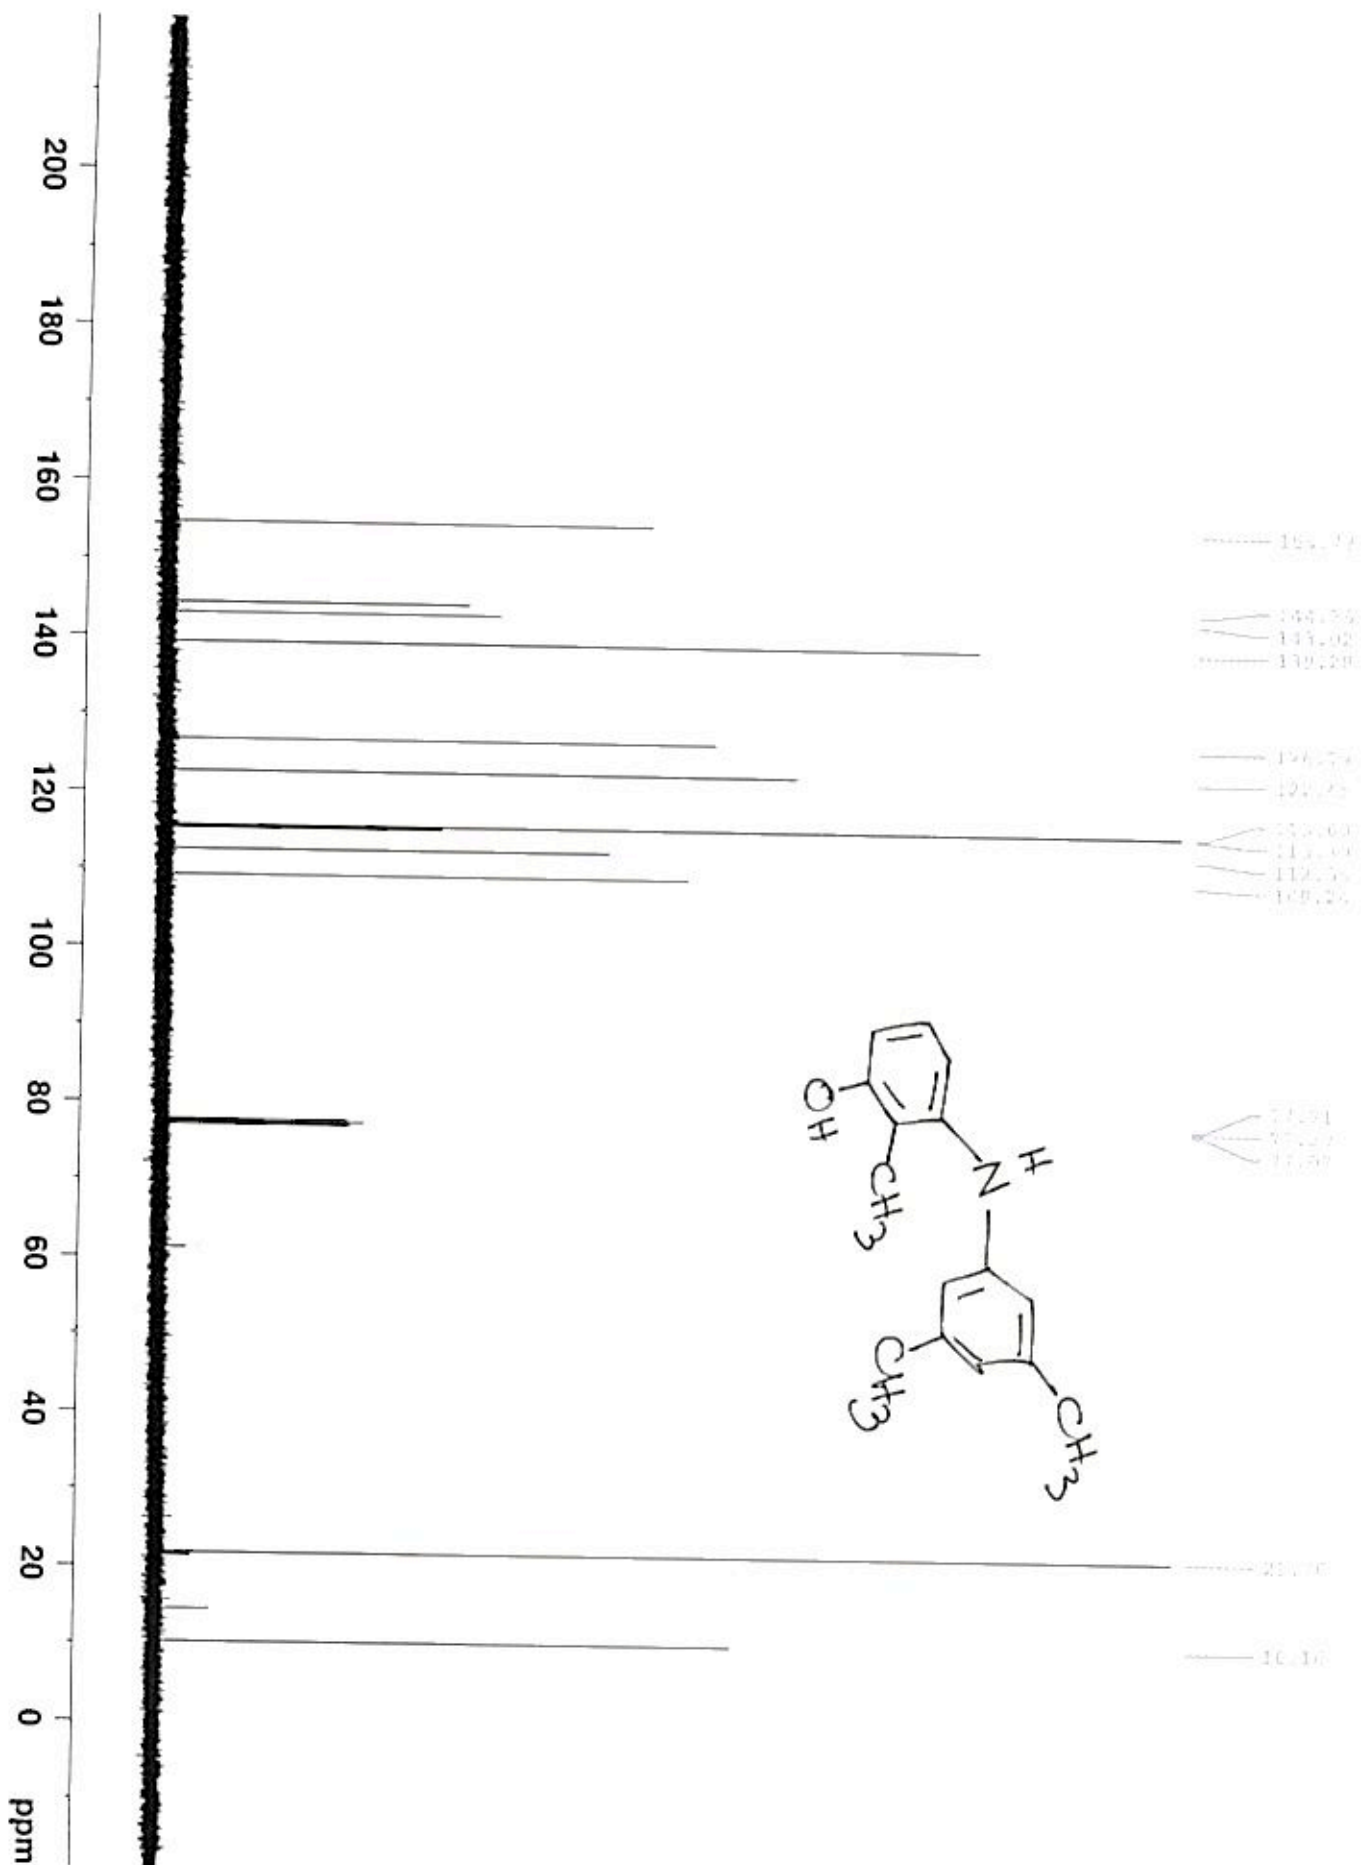

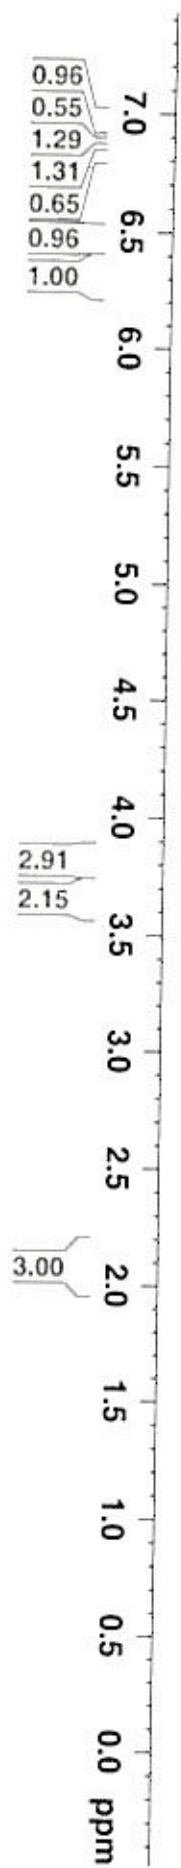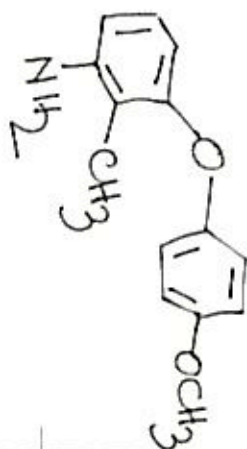

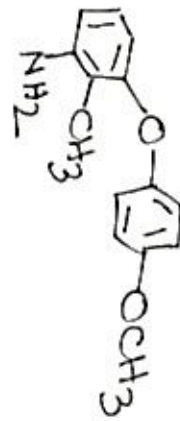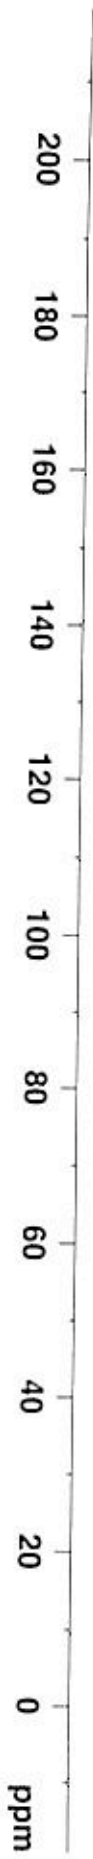

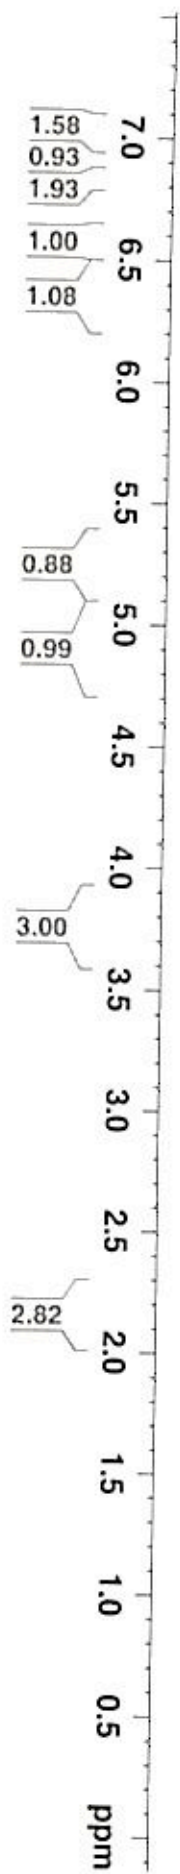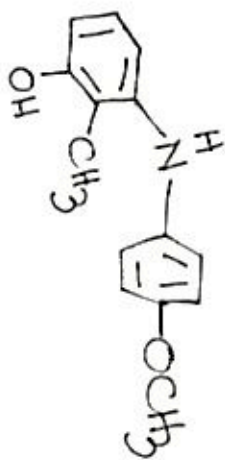

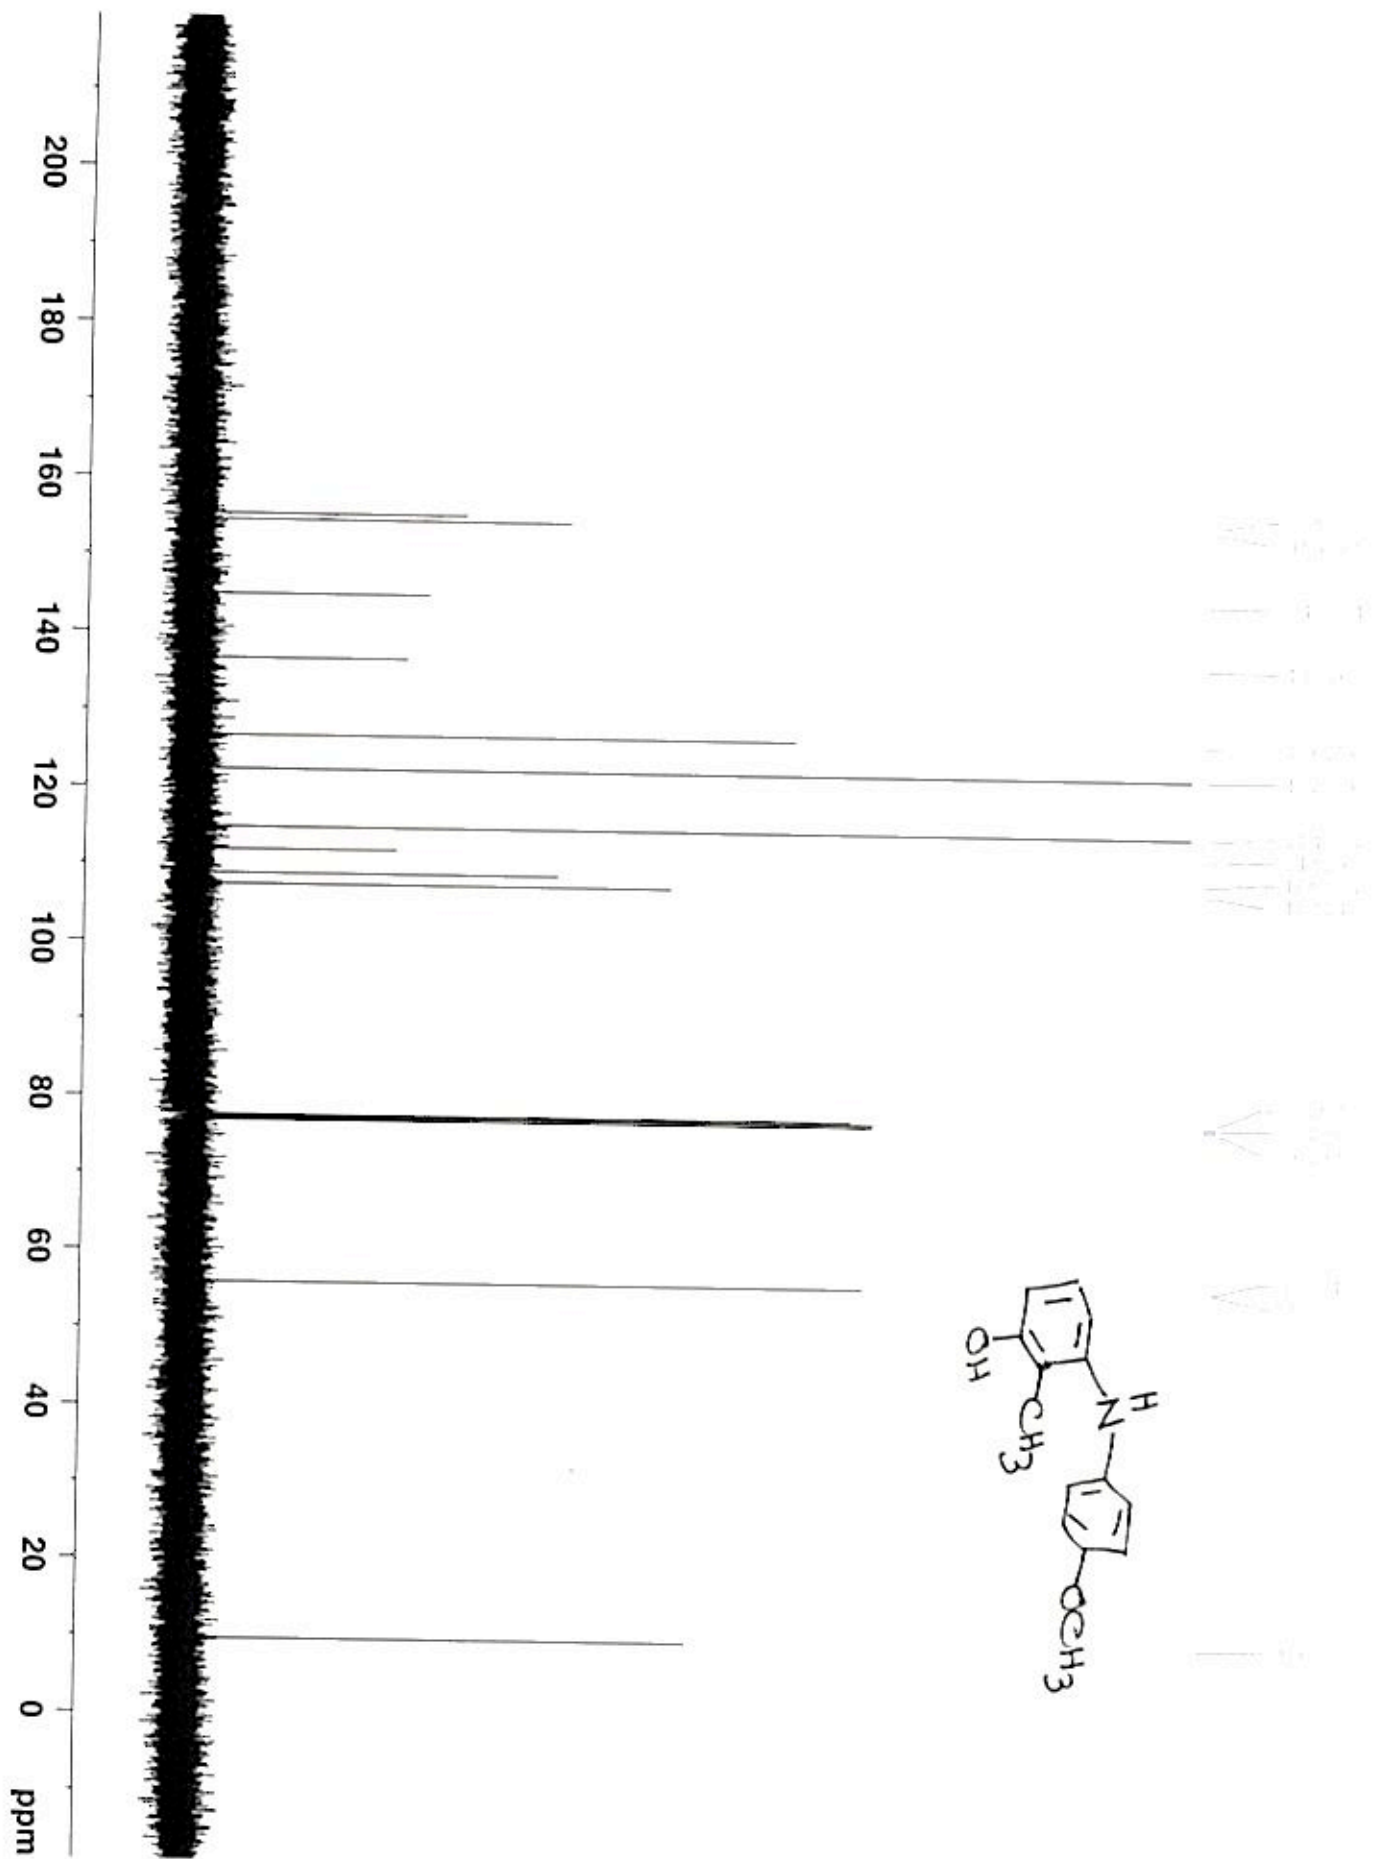

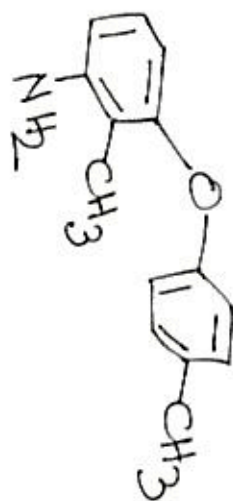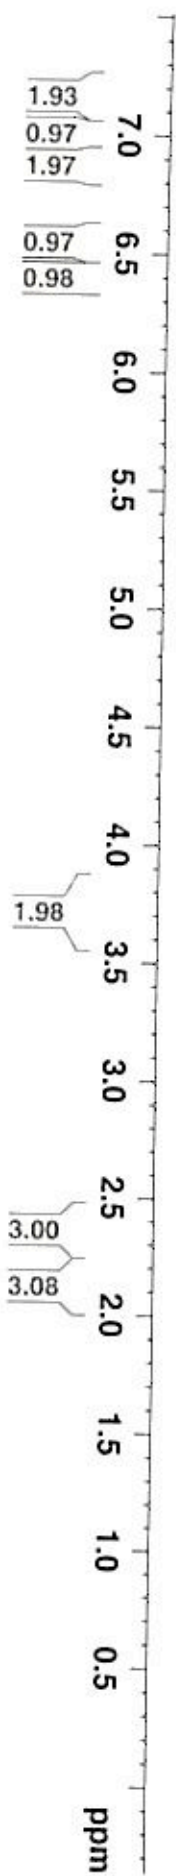

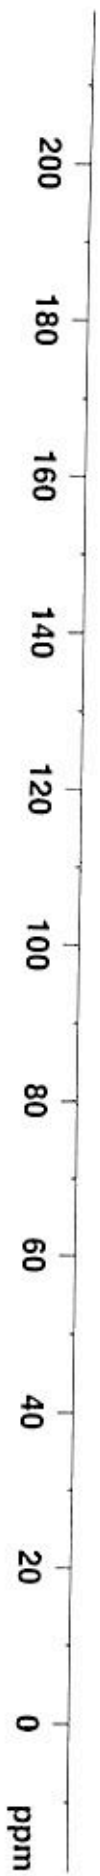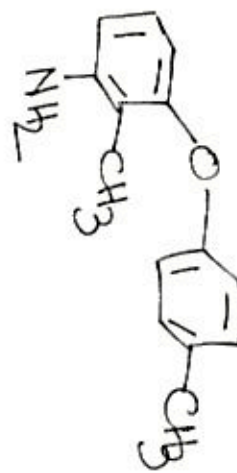

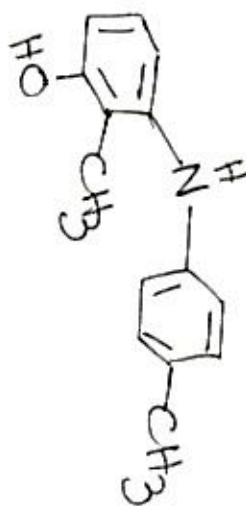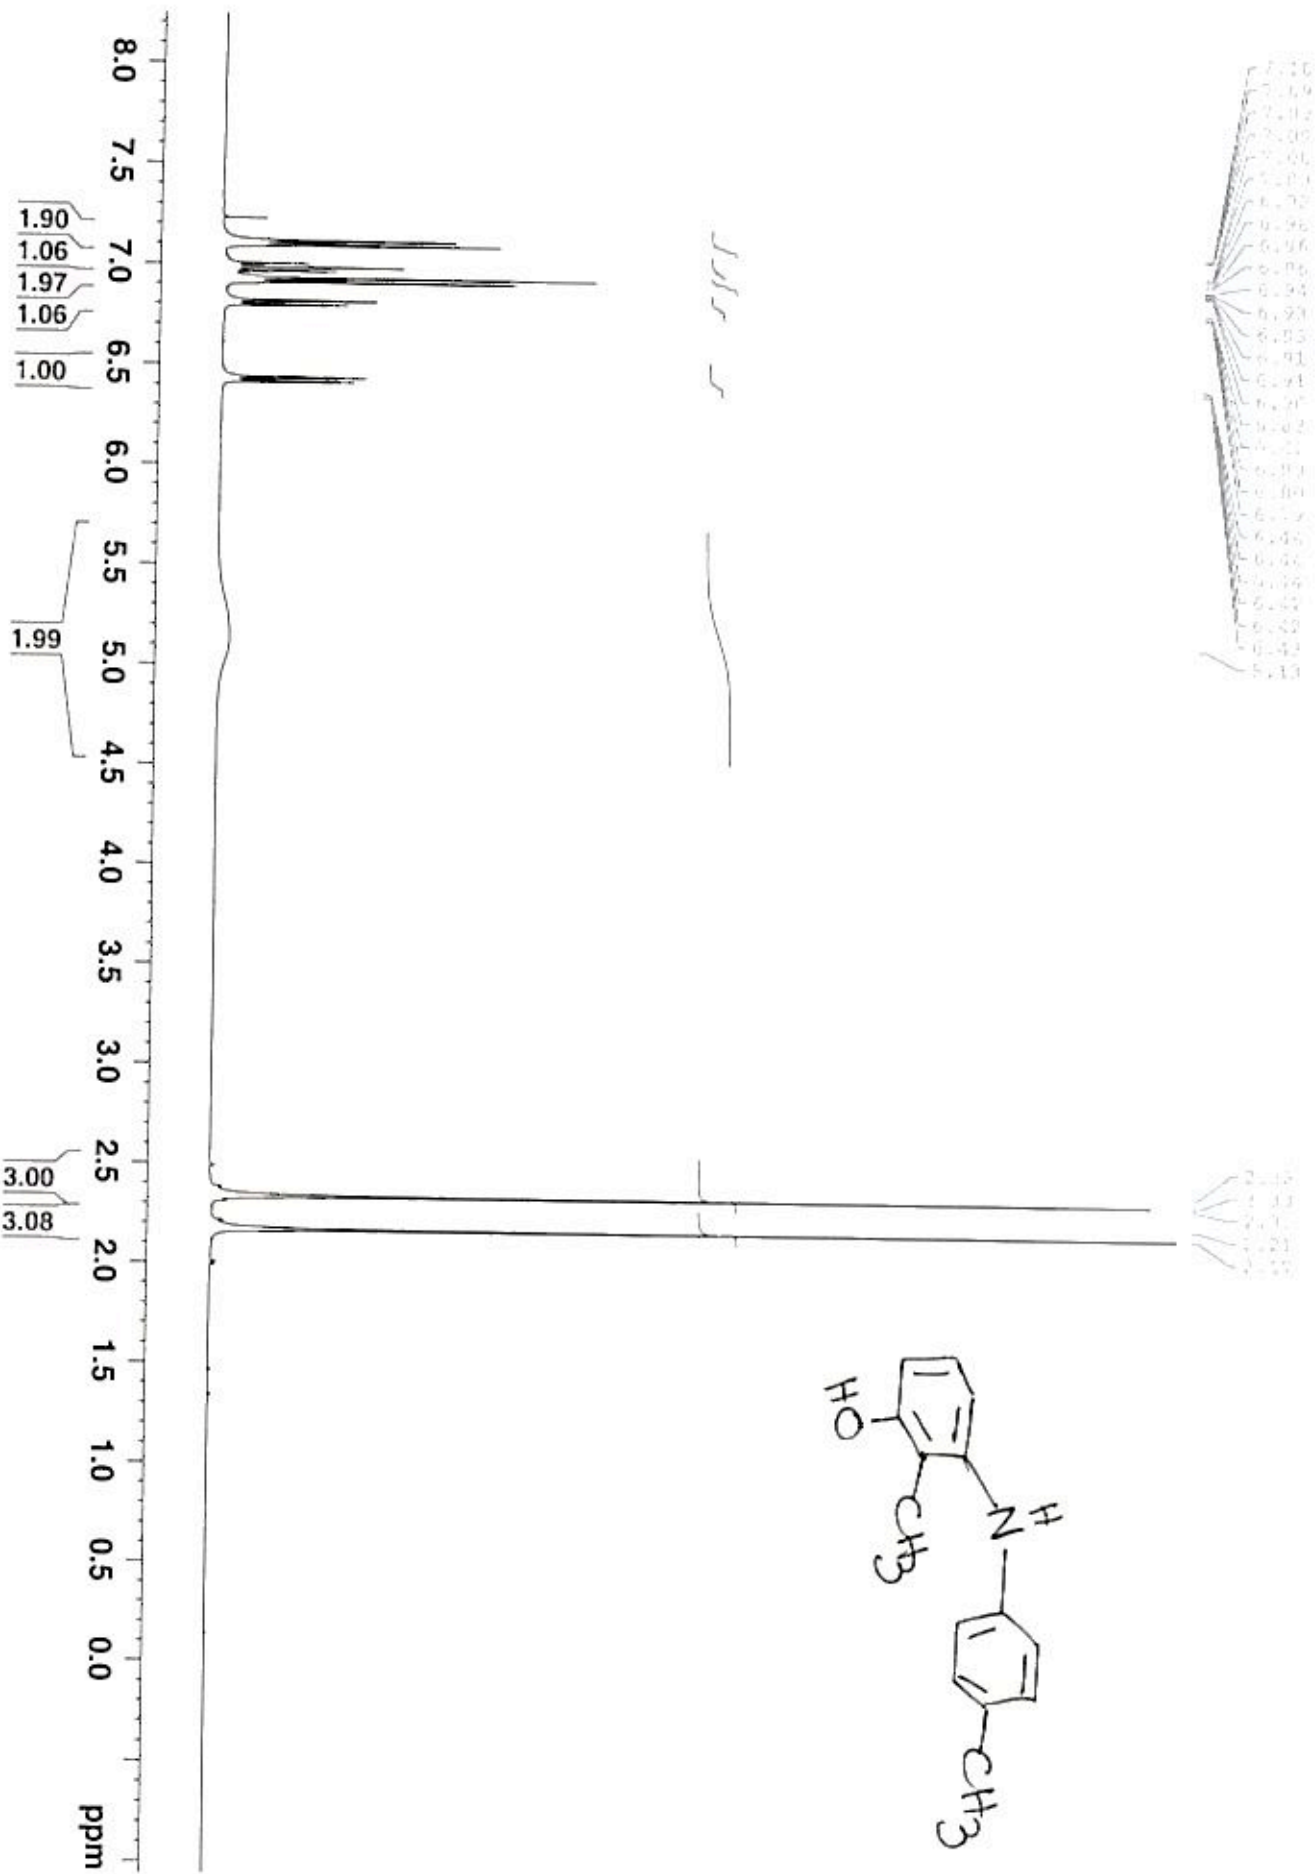



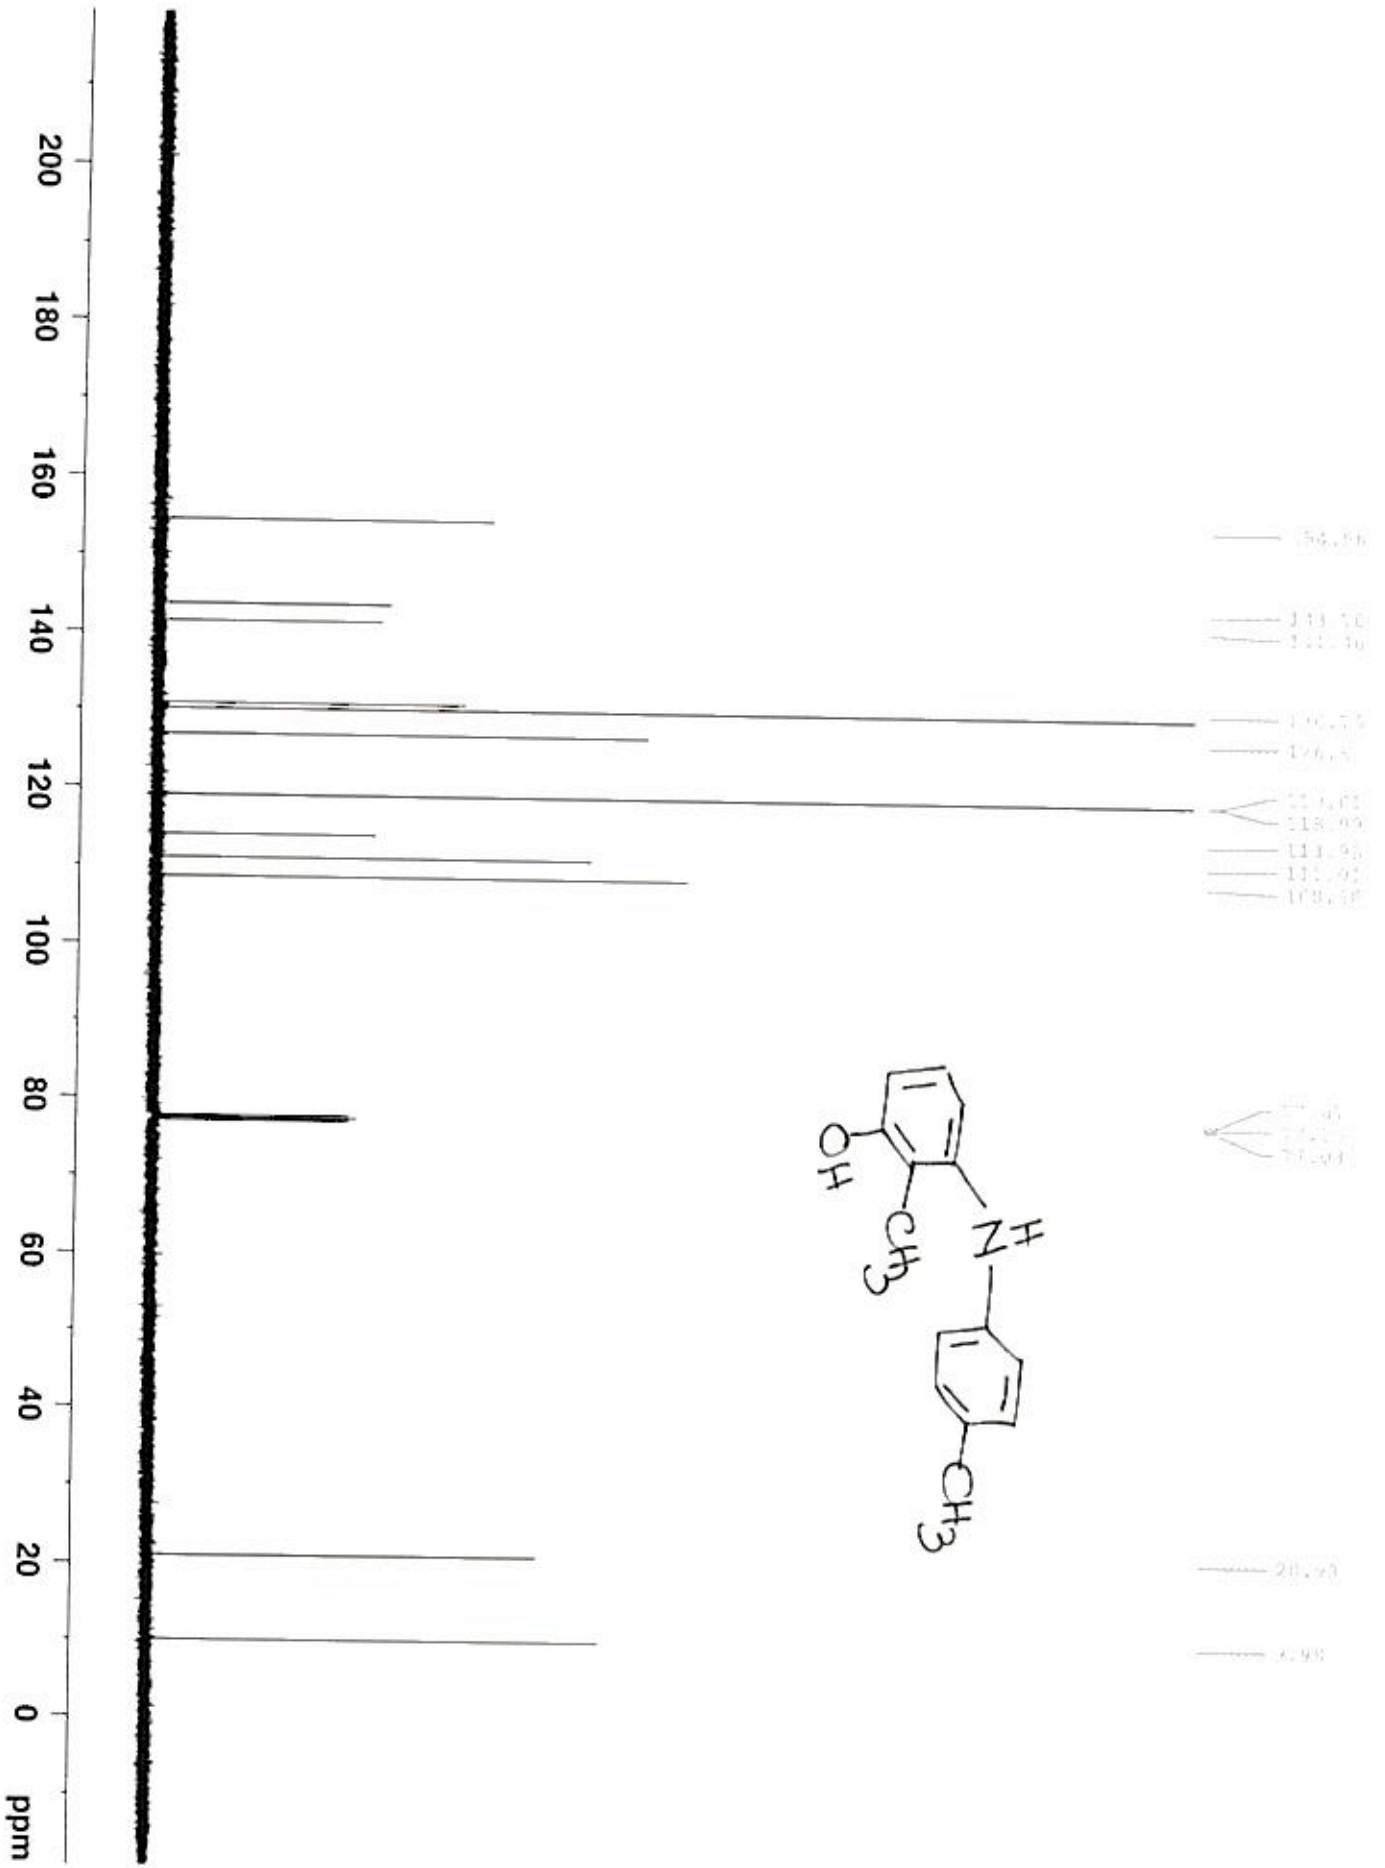

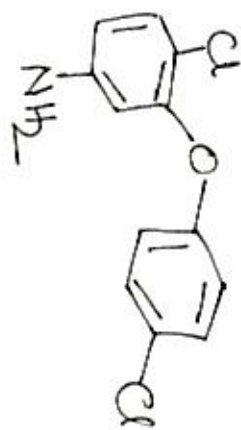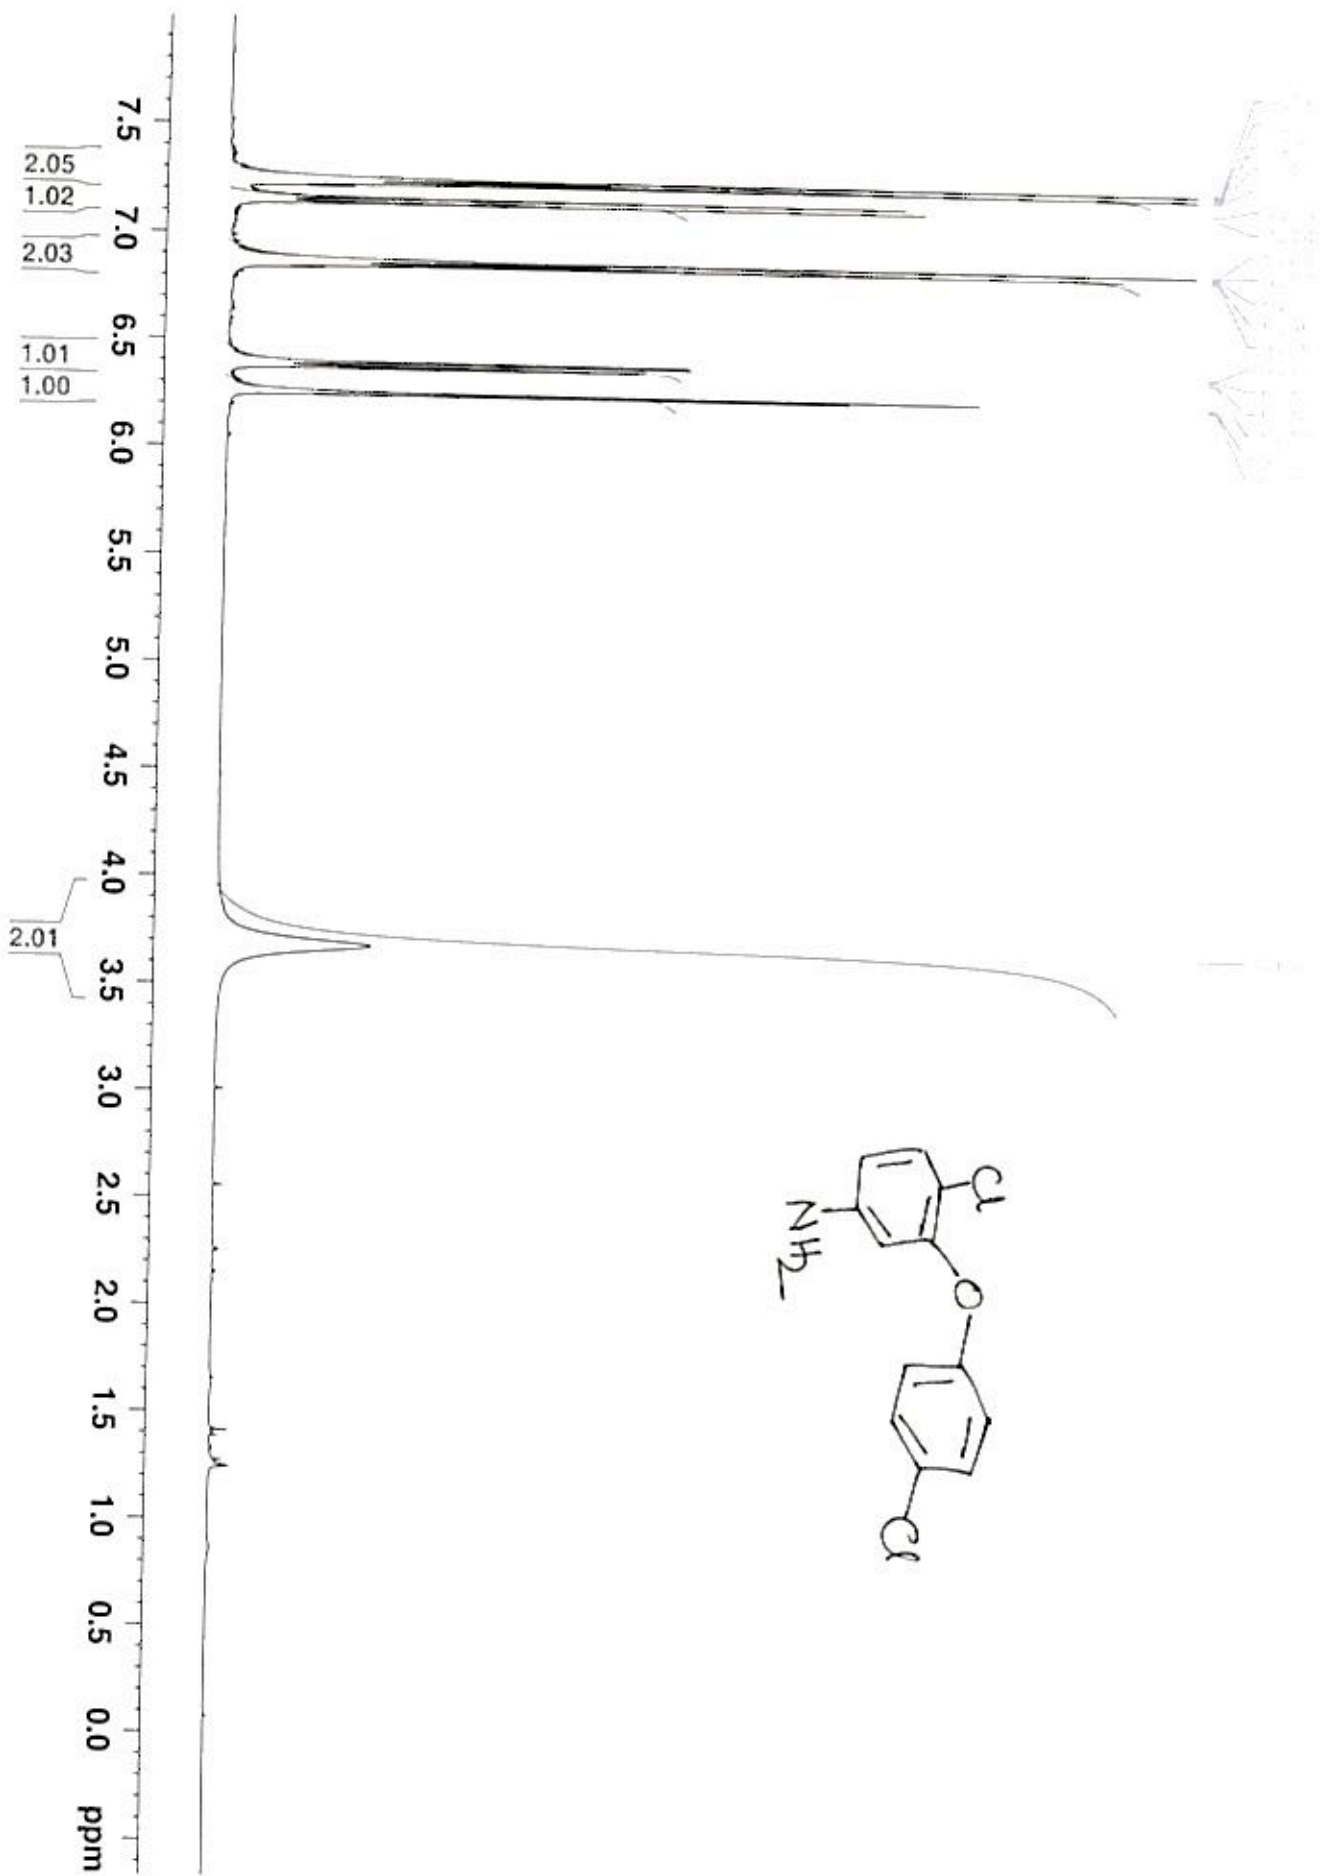

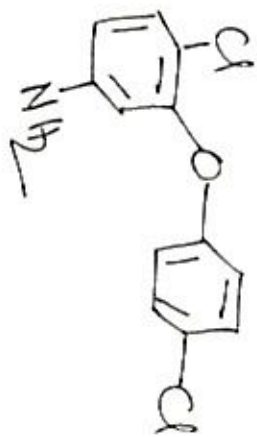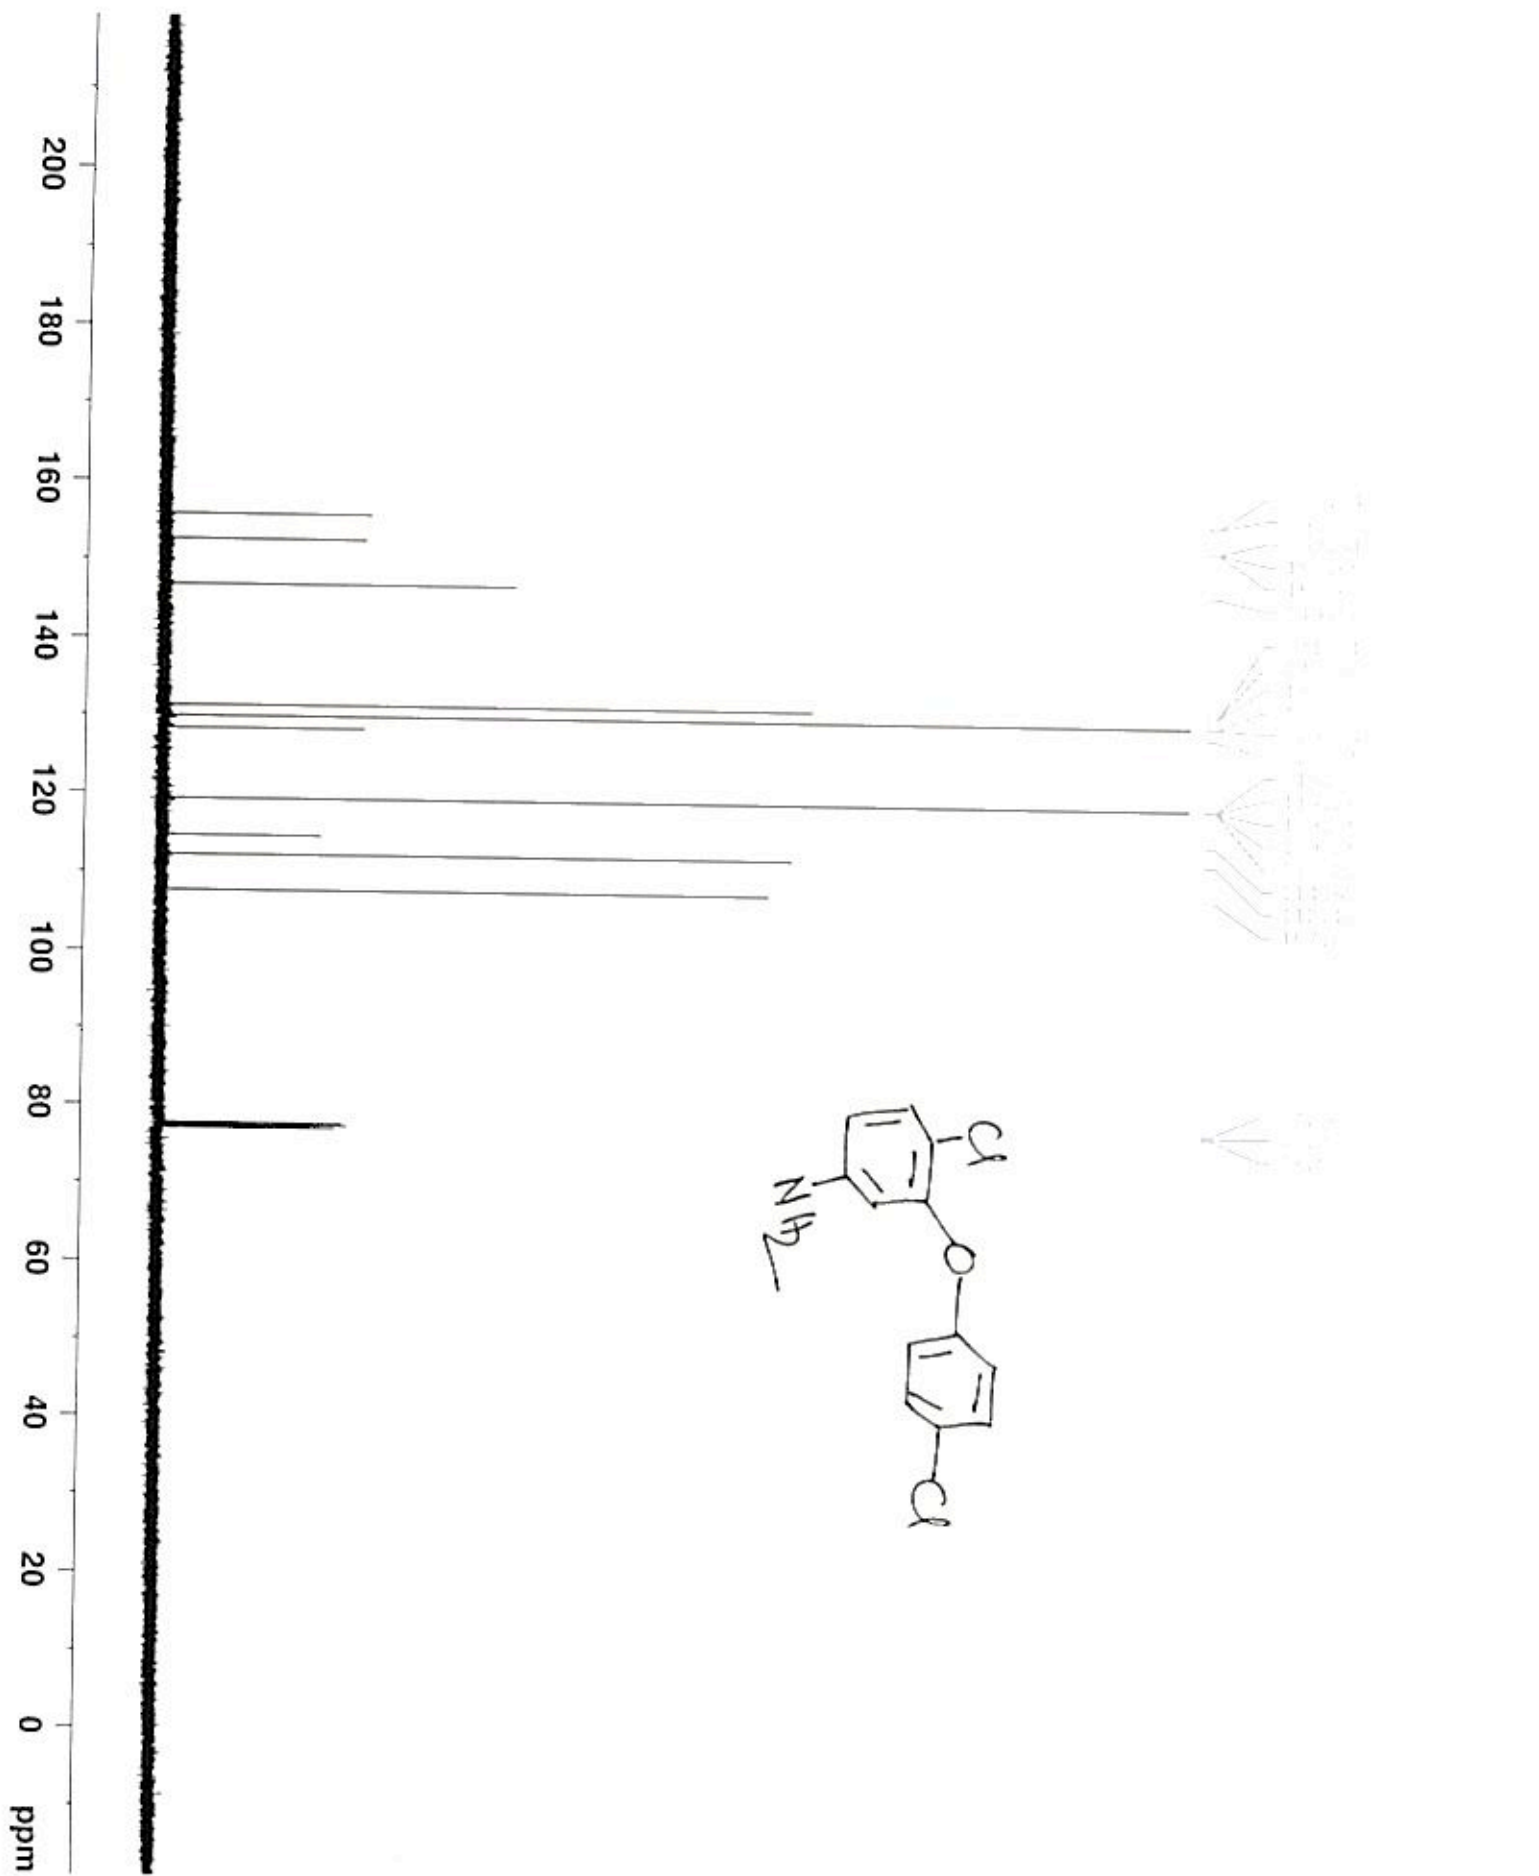

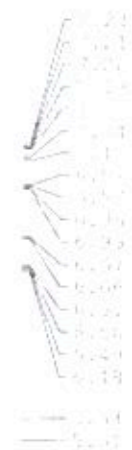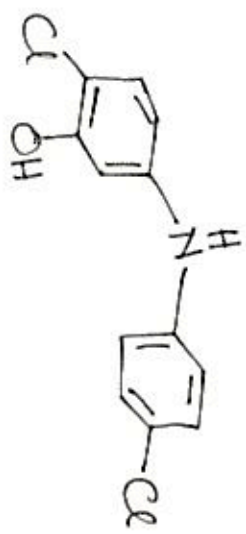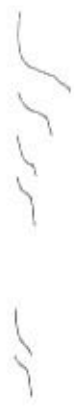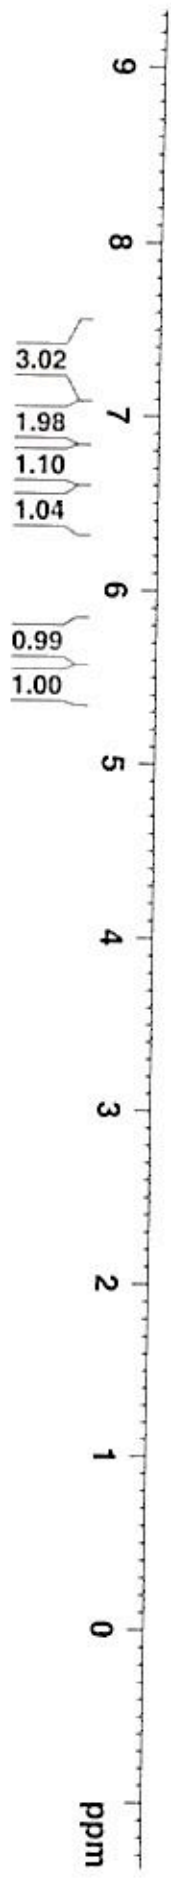

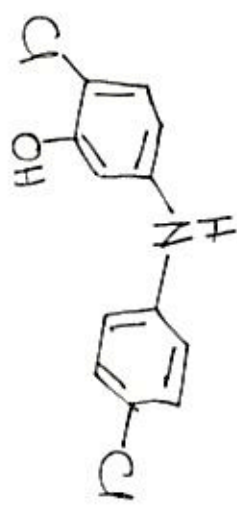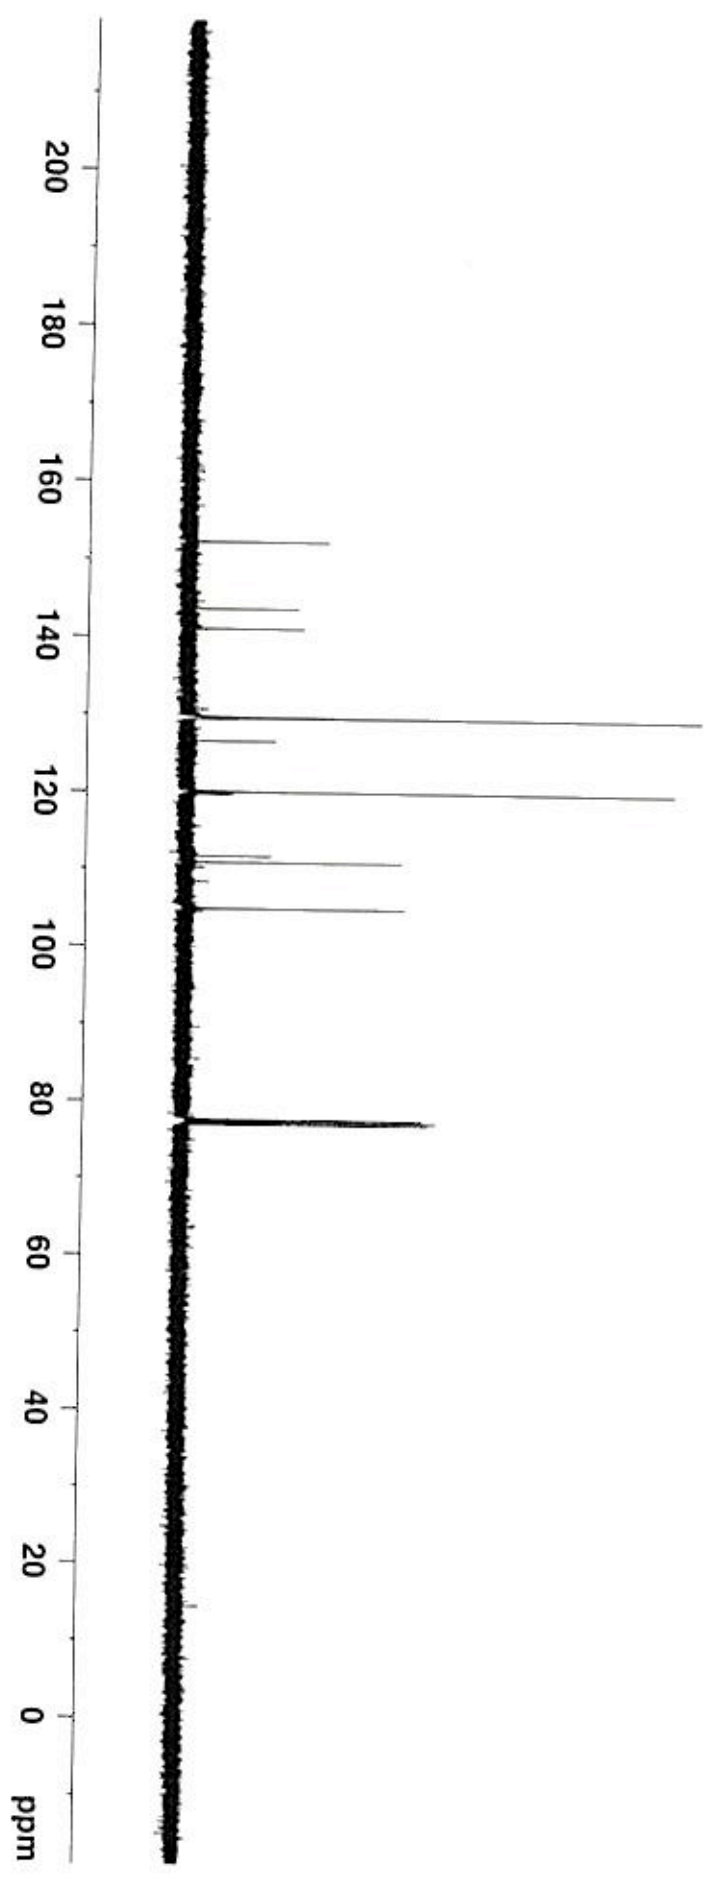

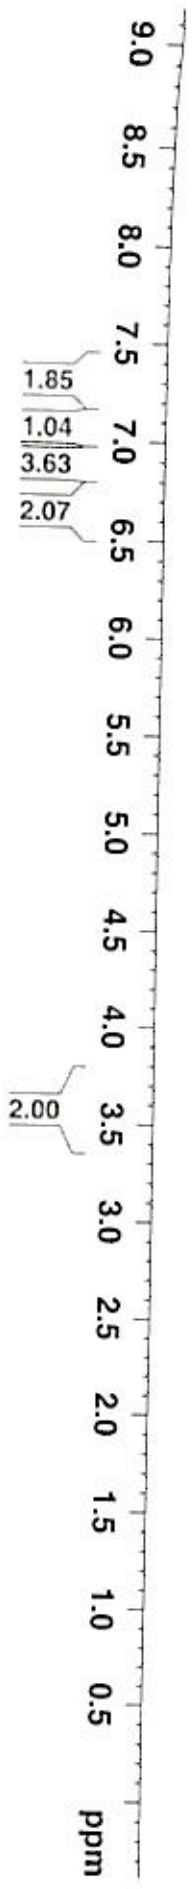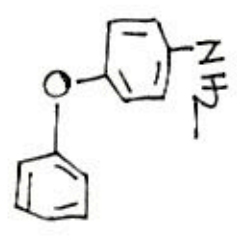

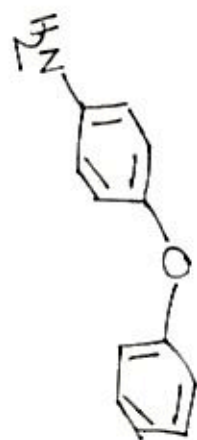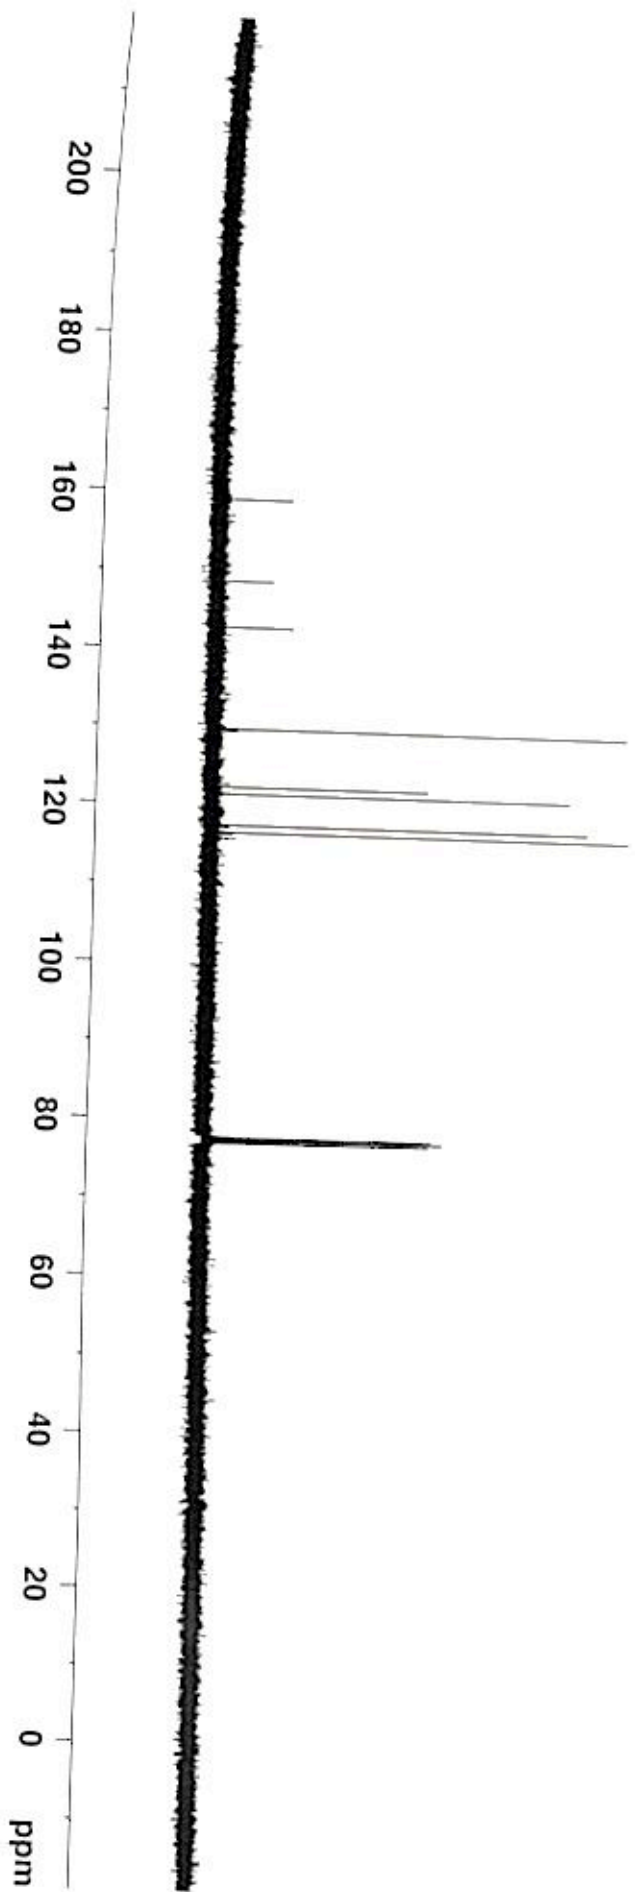

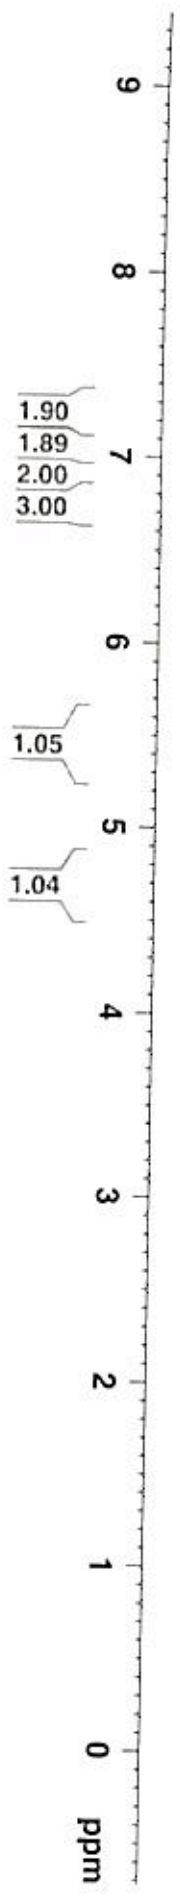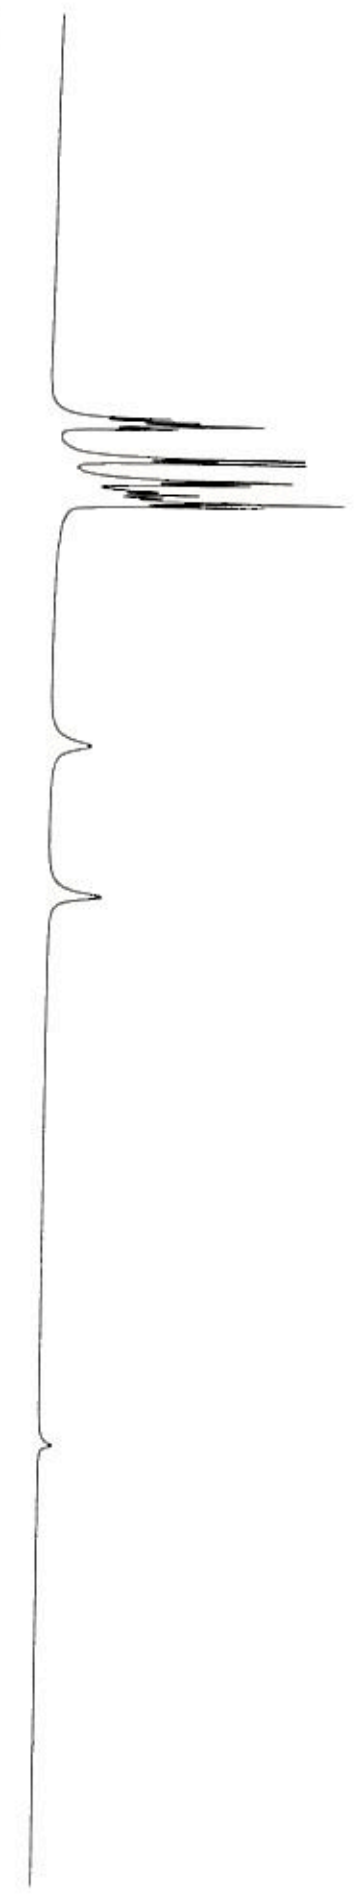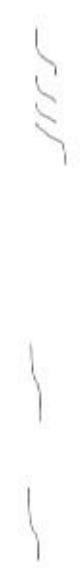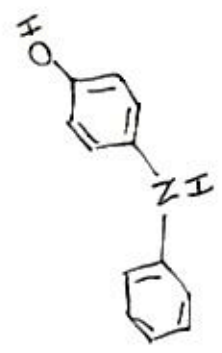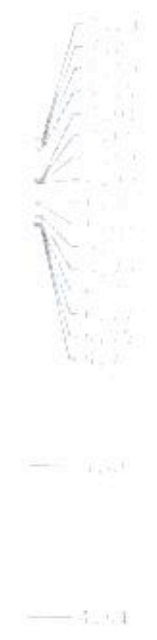



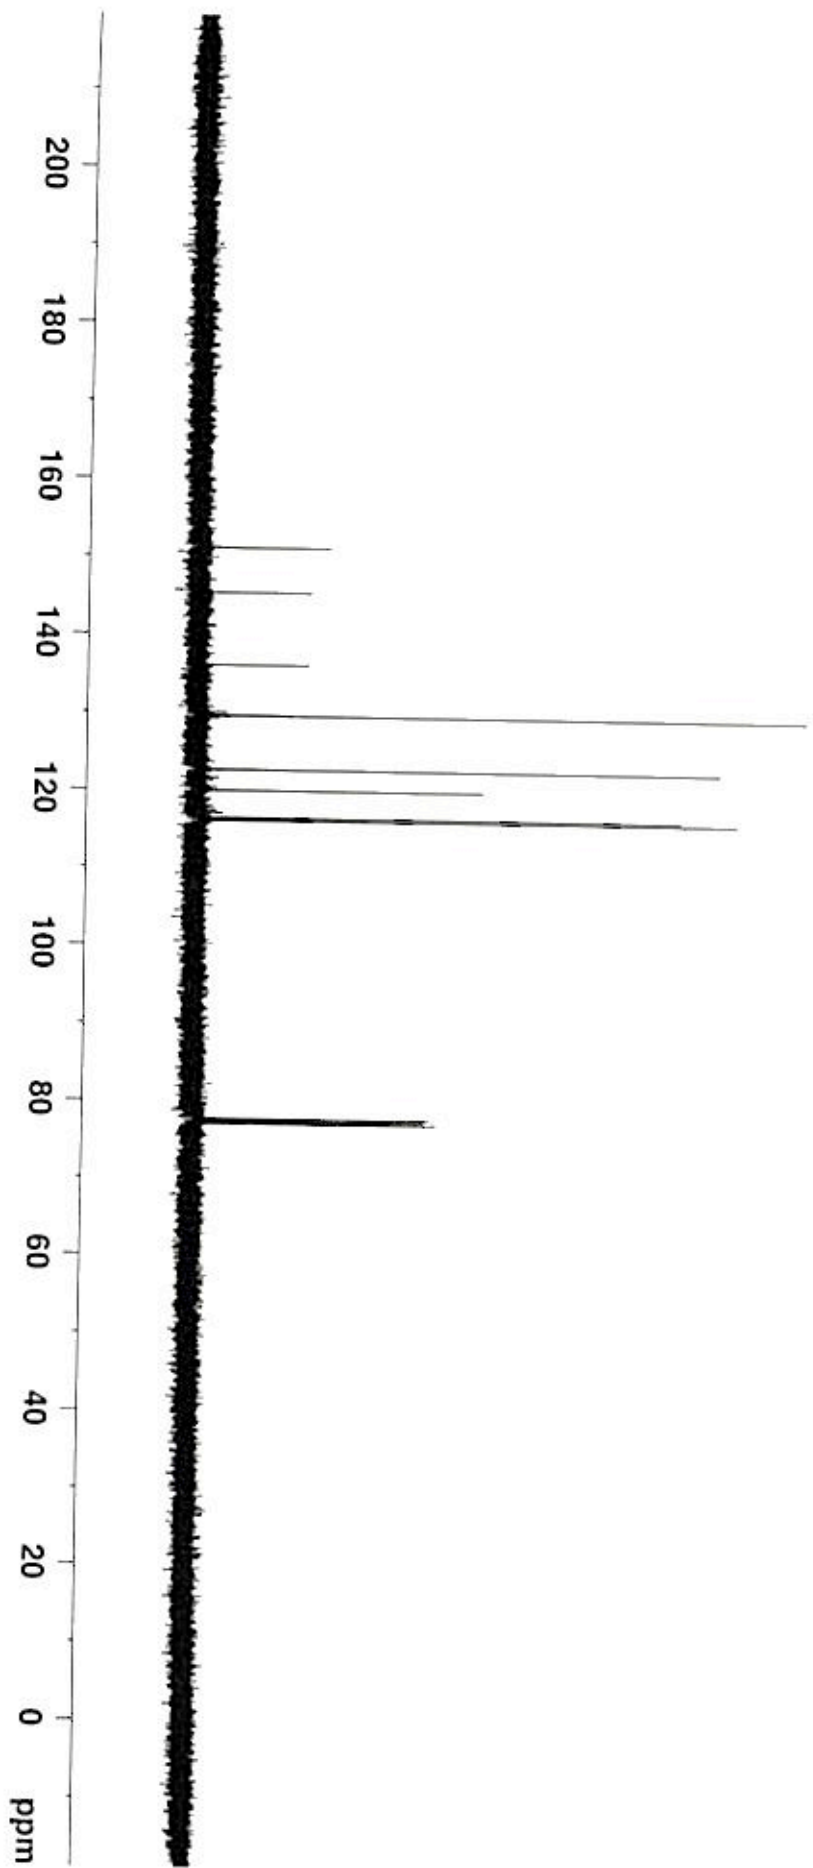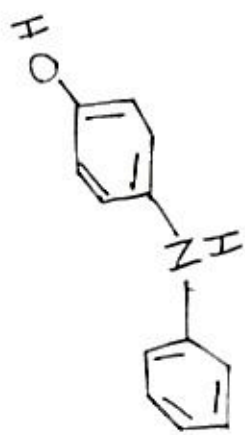

*[Faint, illegible handwritten text]*

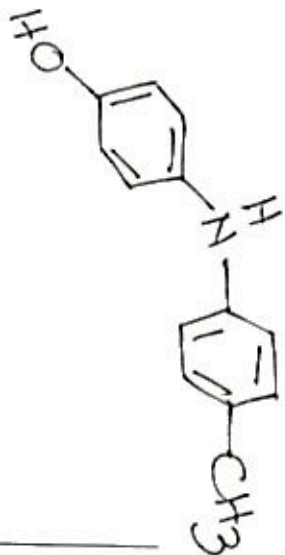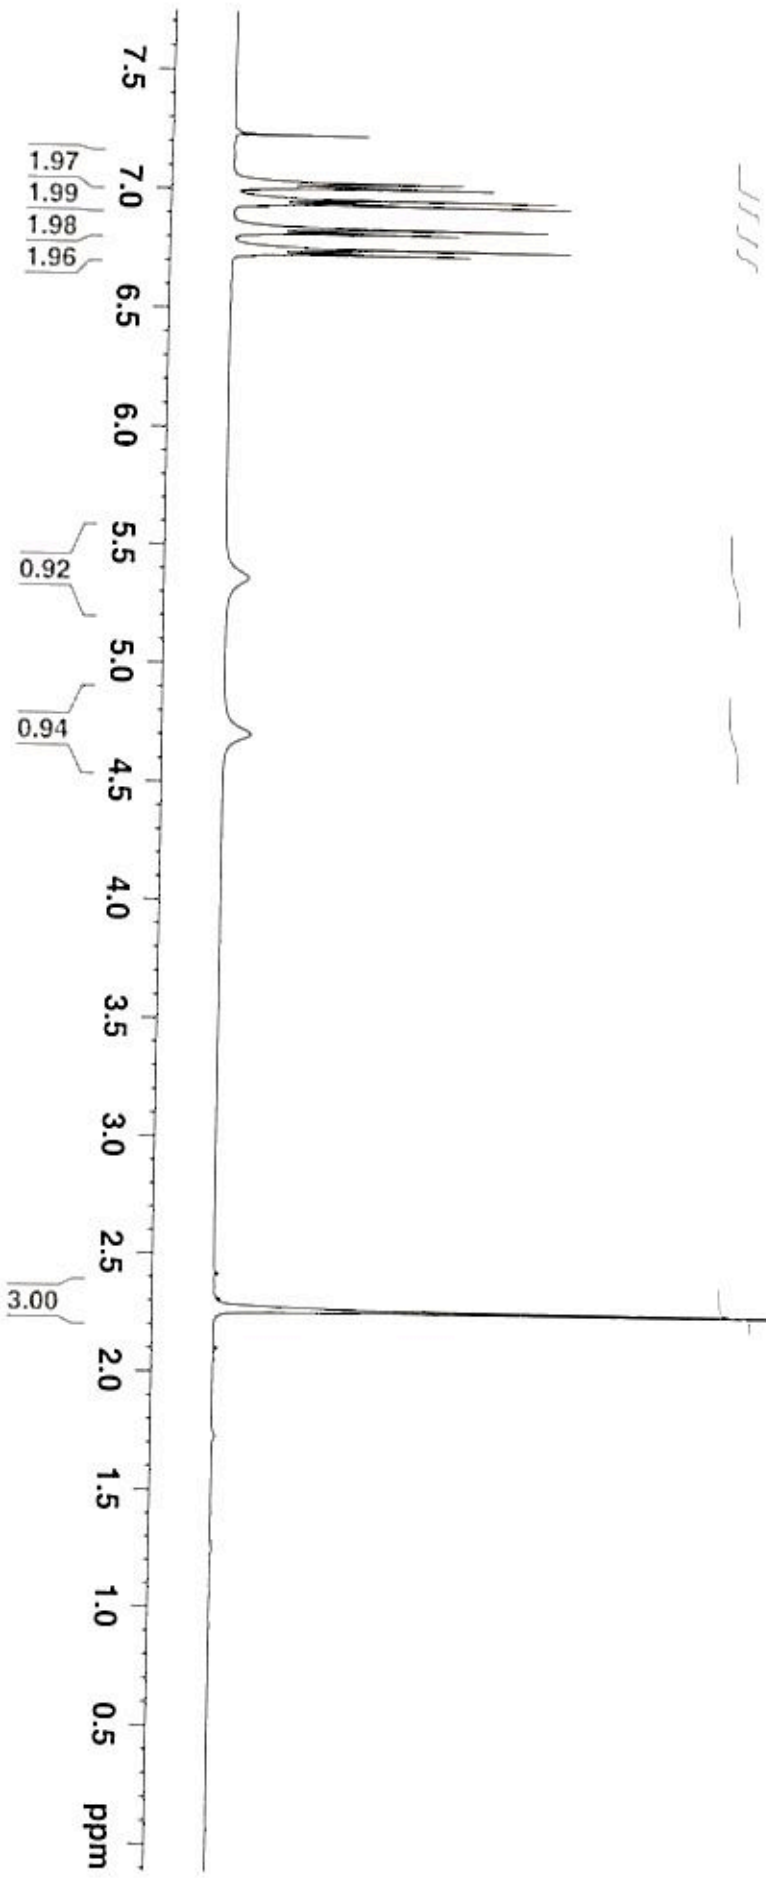

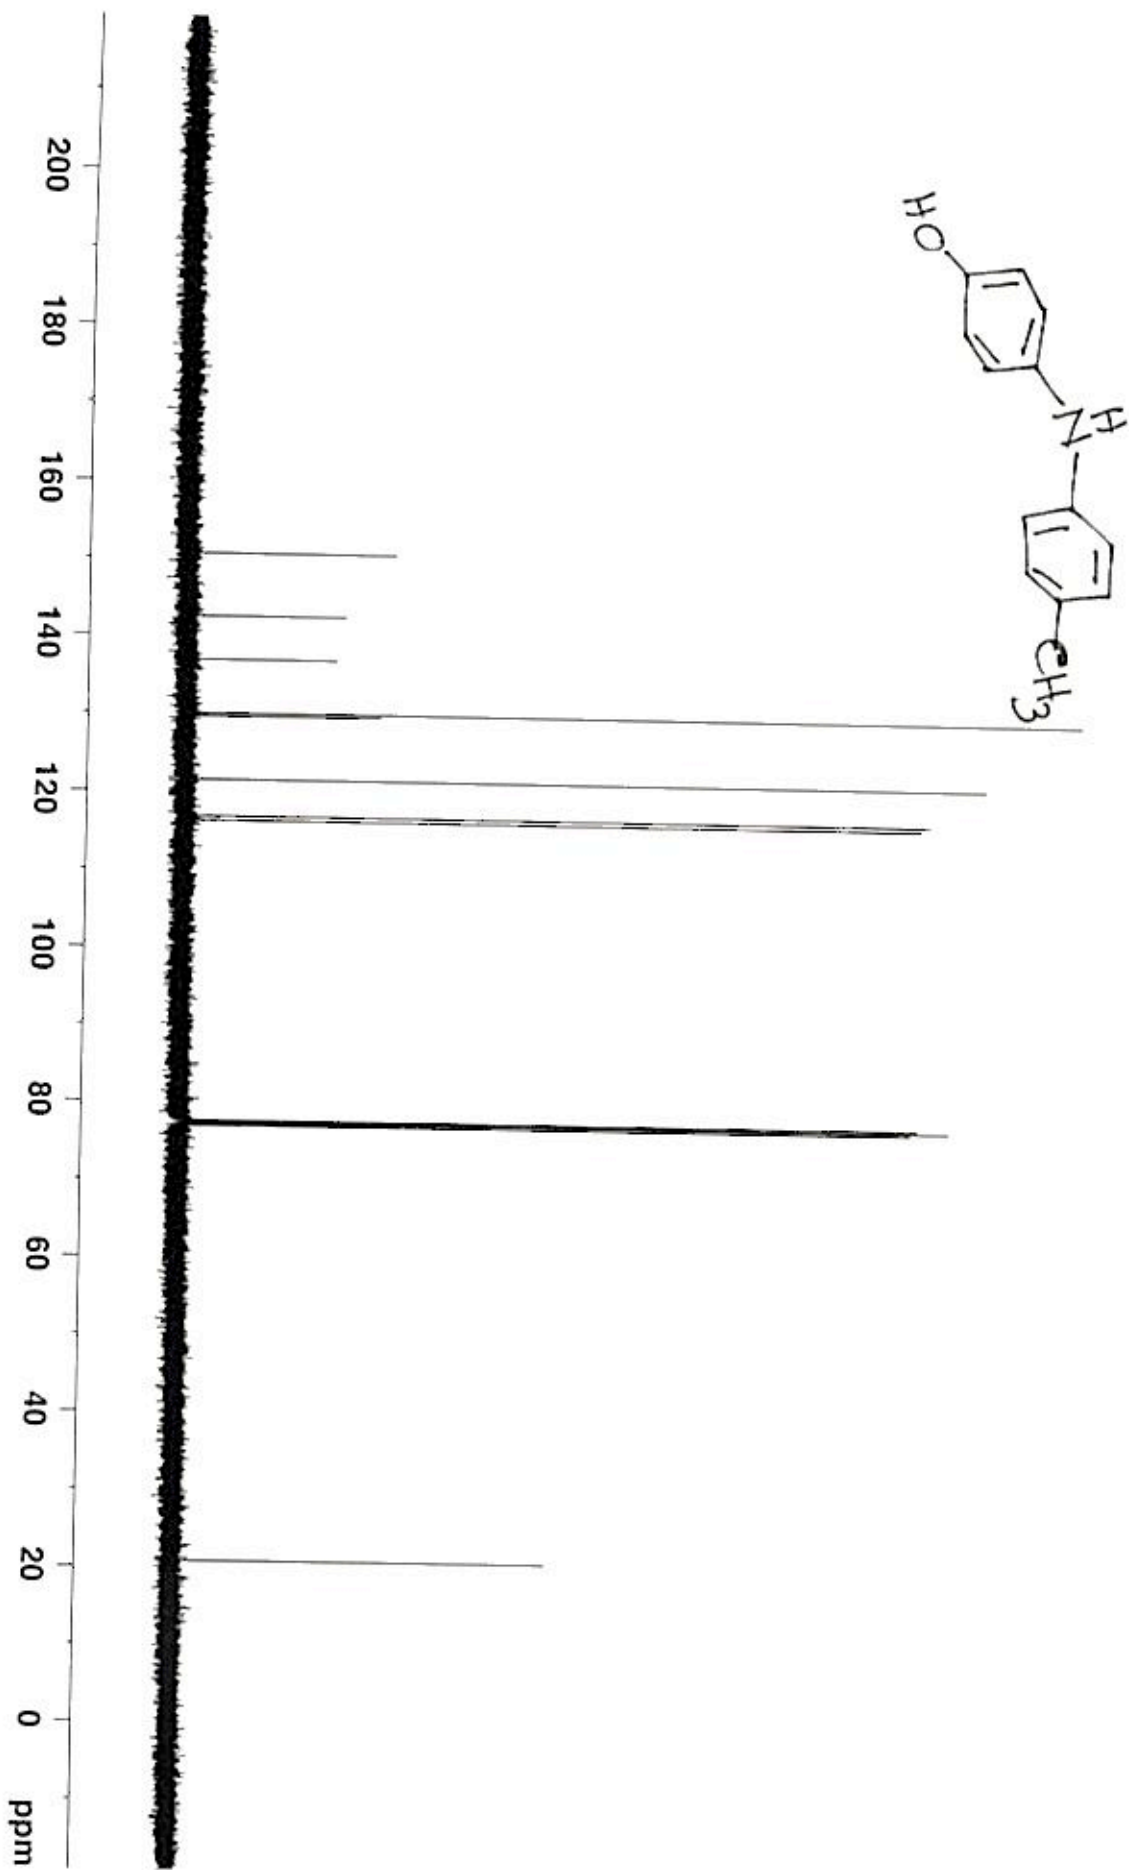

13C NMR

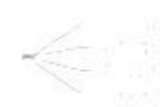

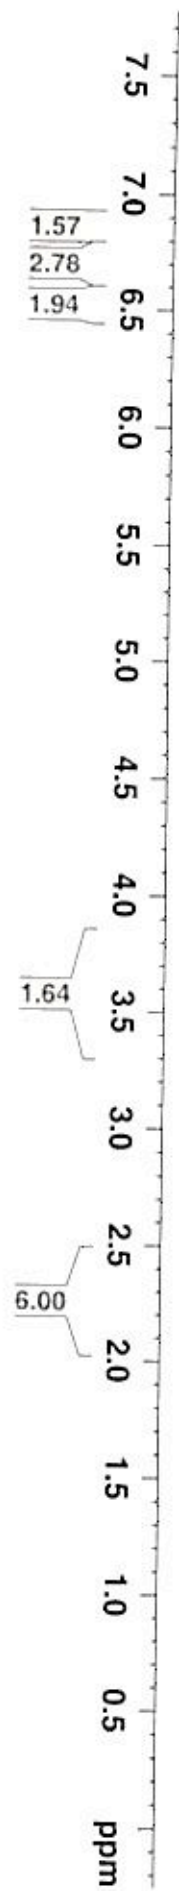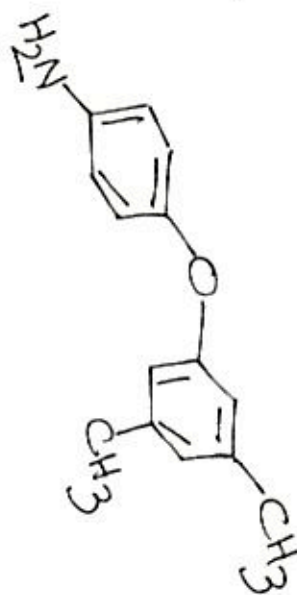

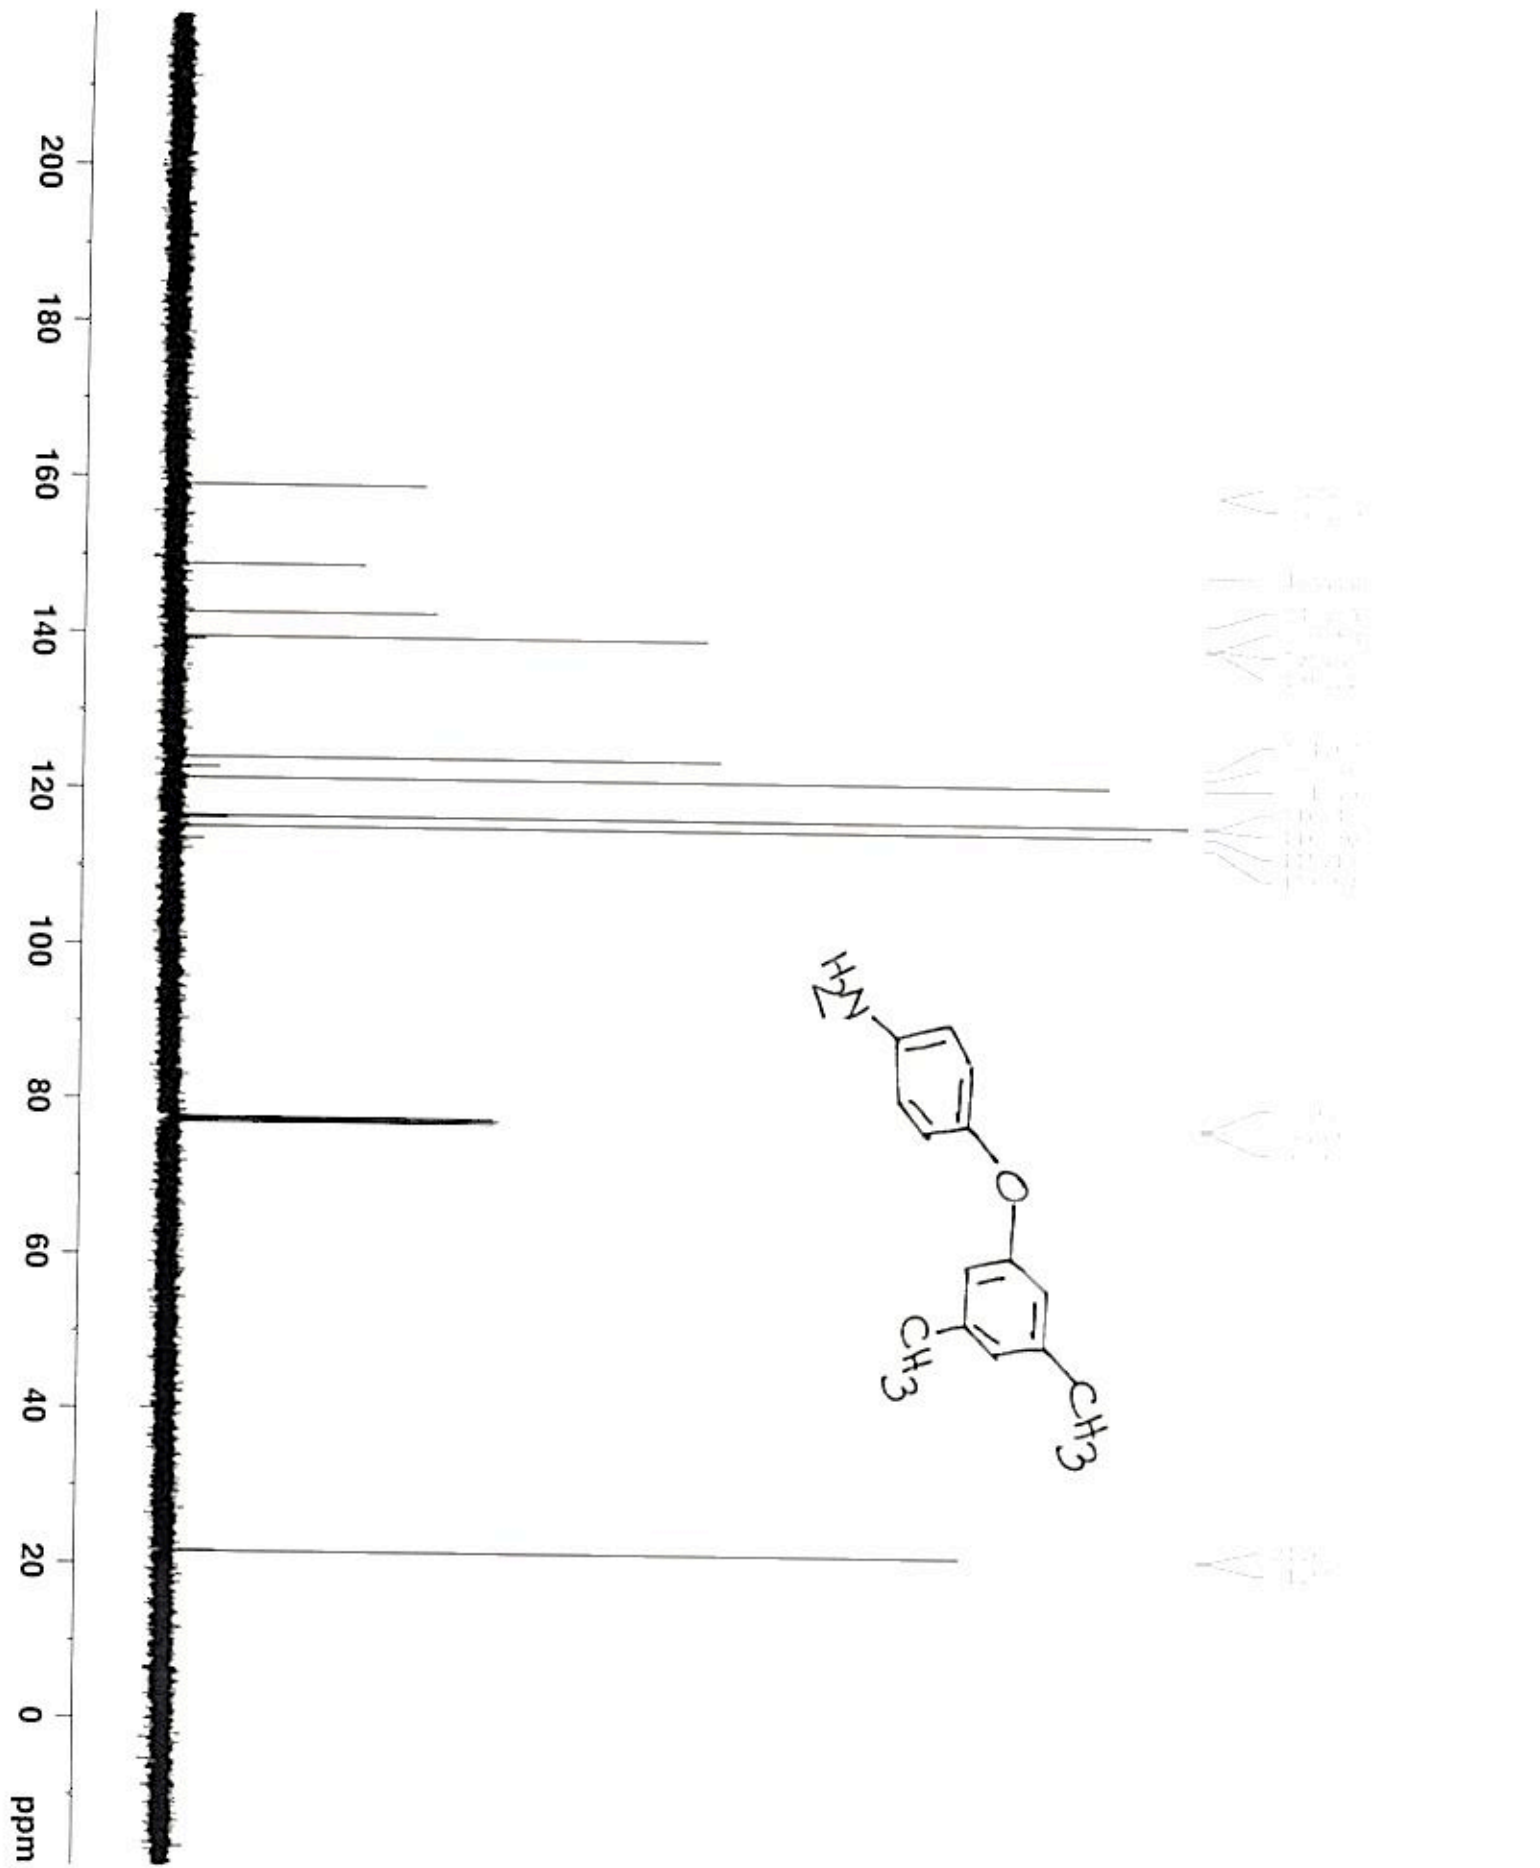

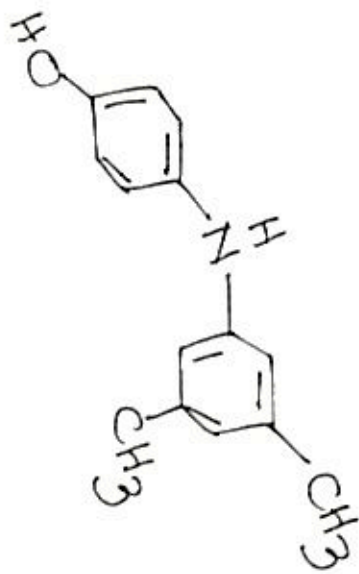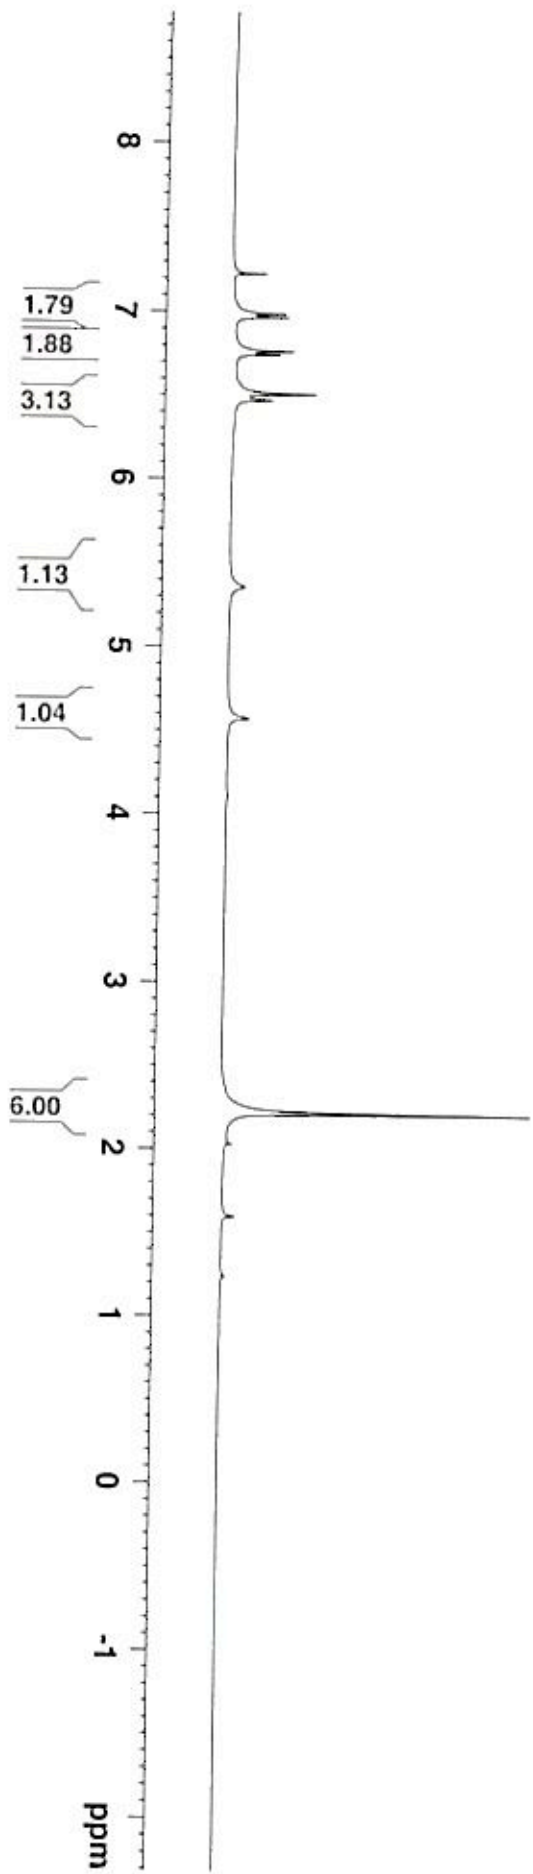

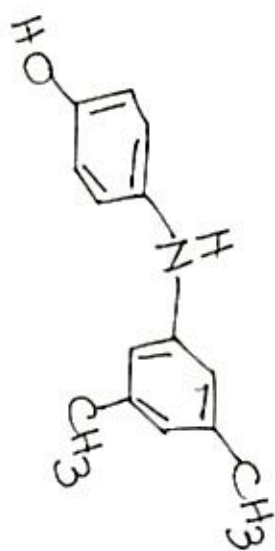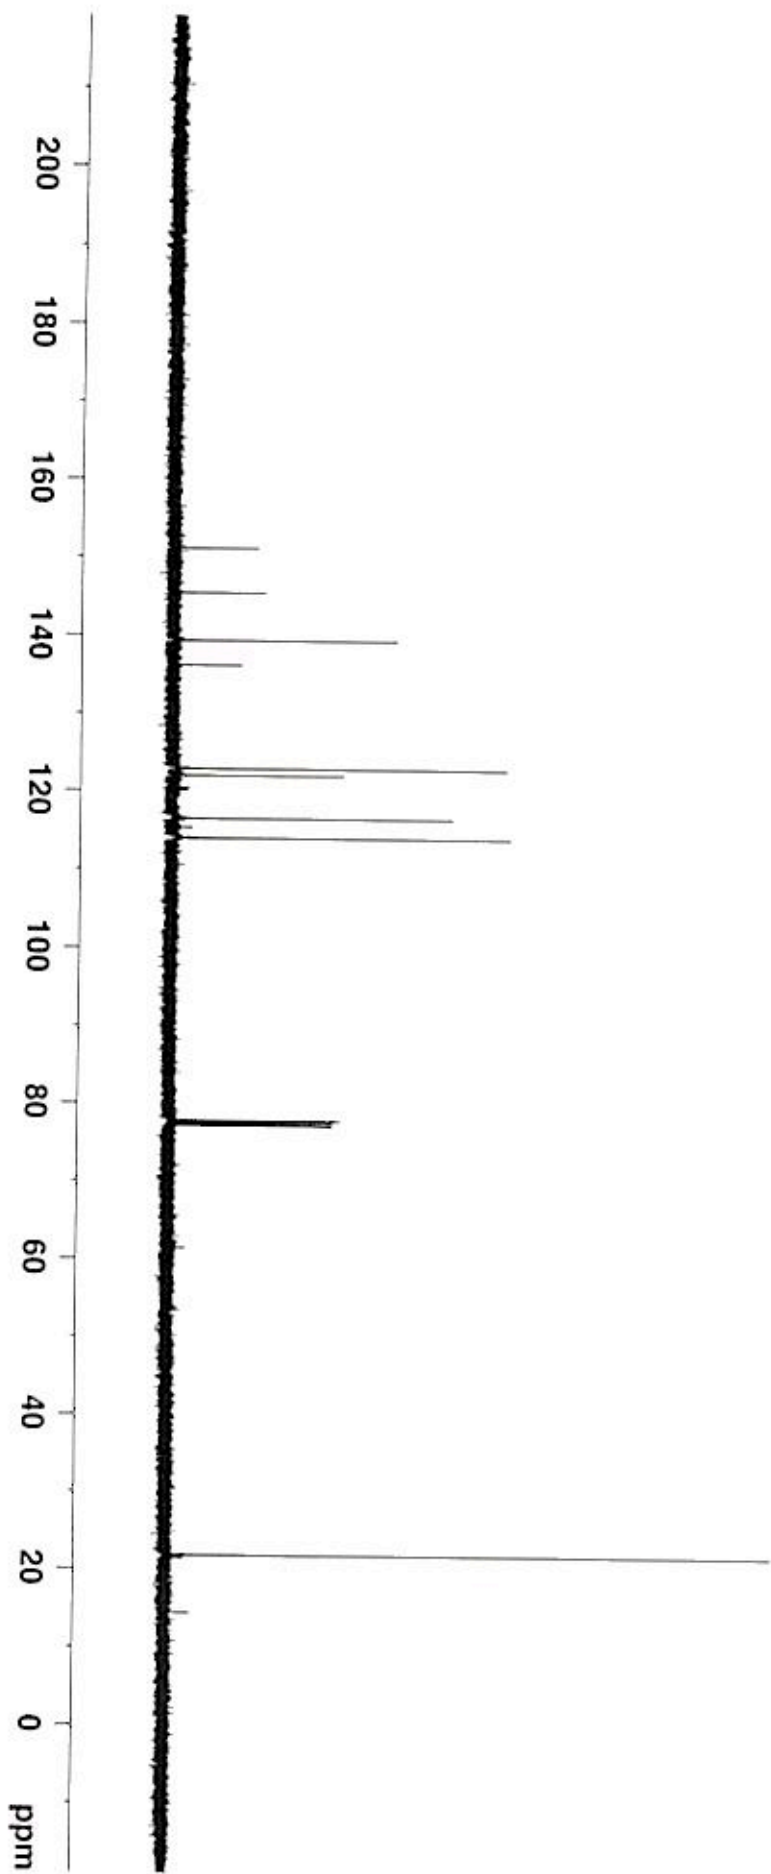

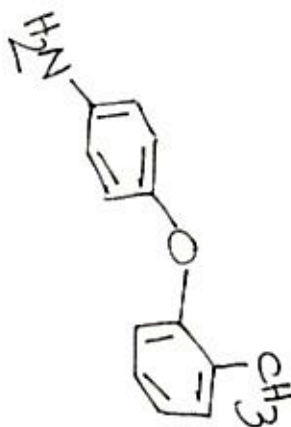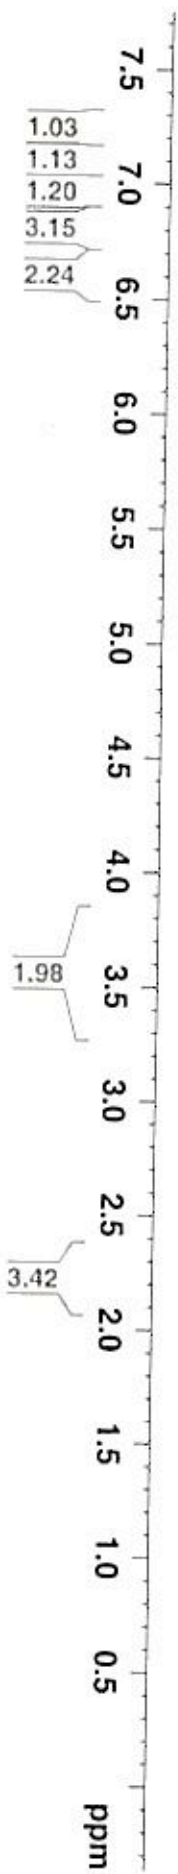



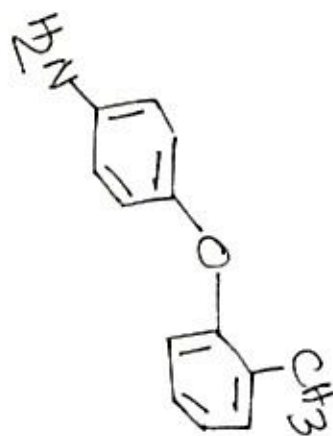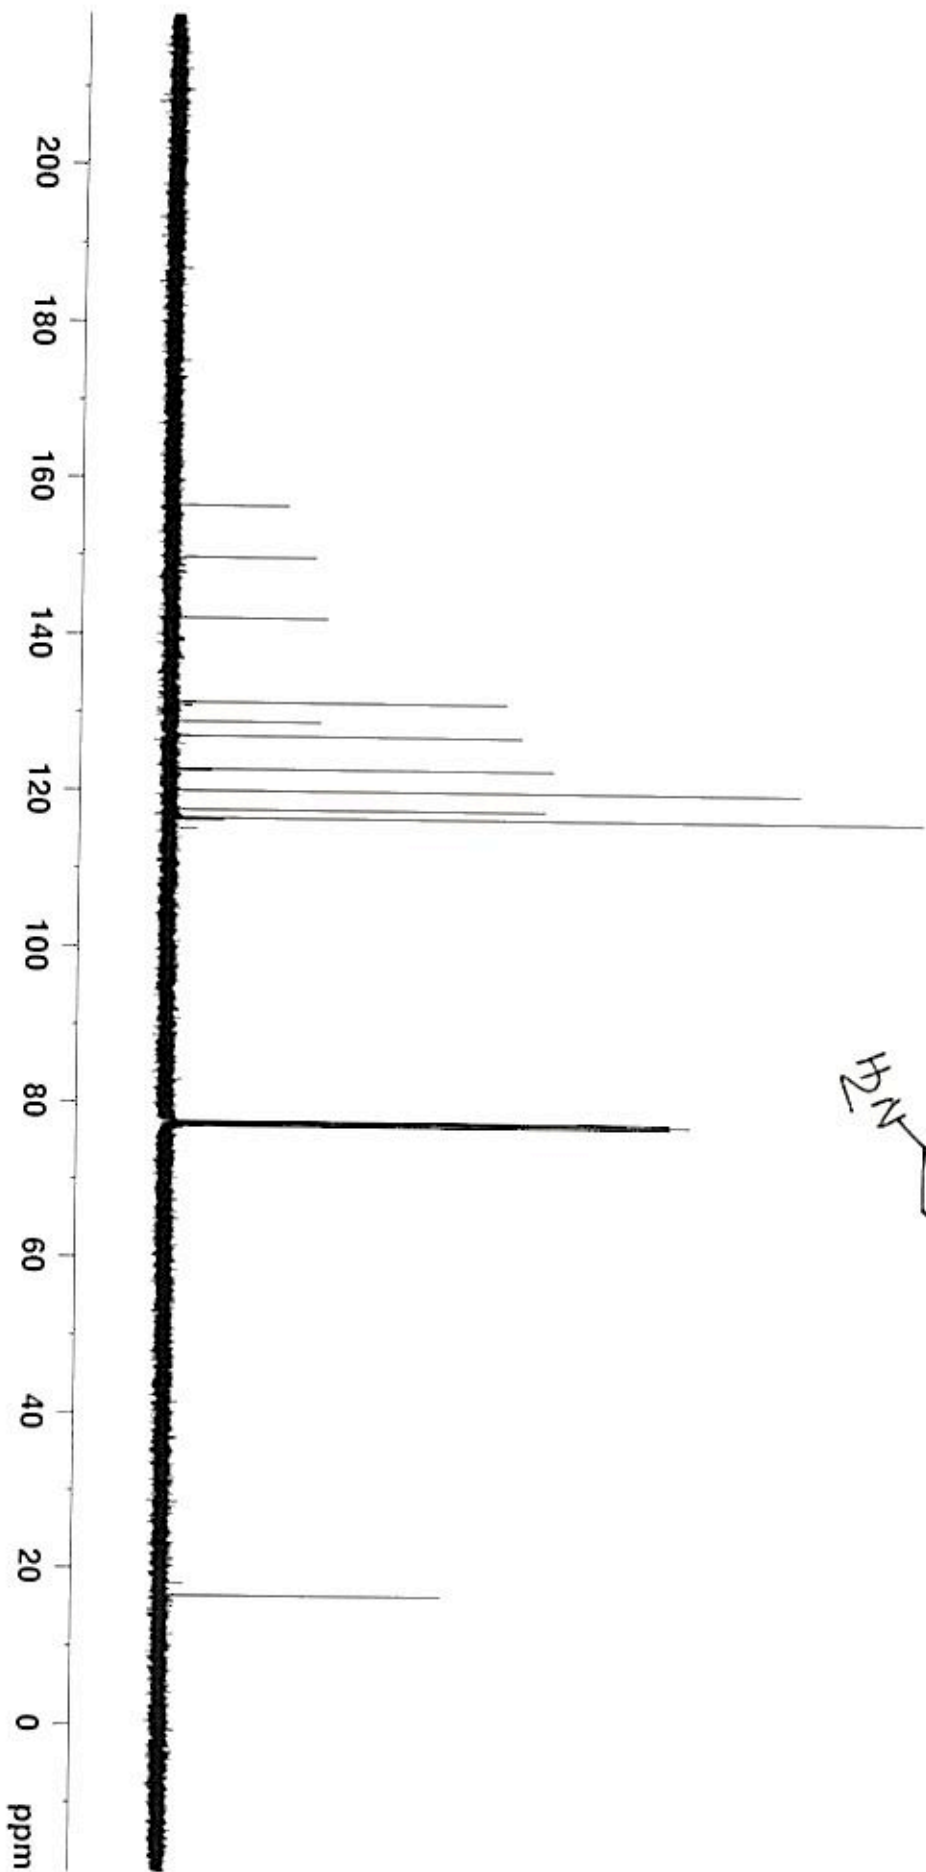

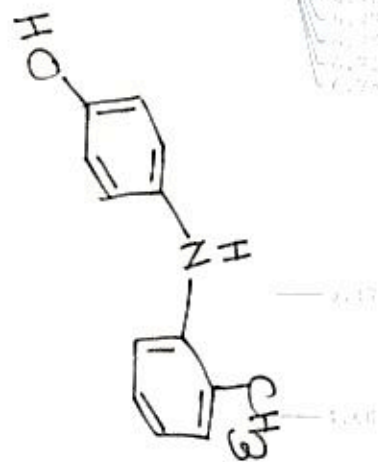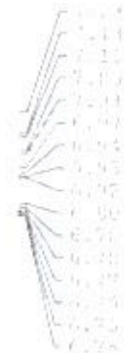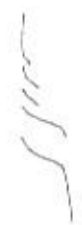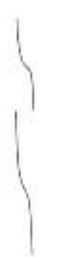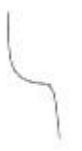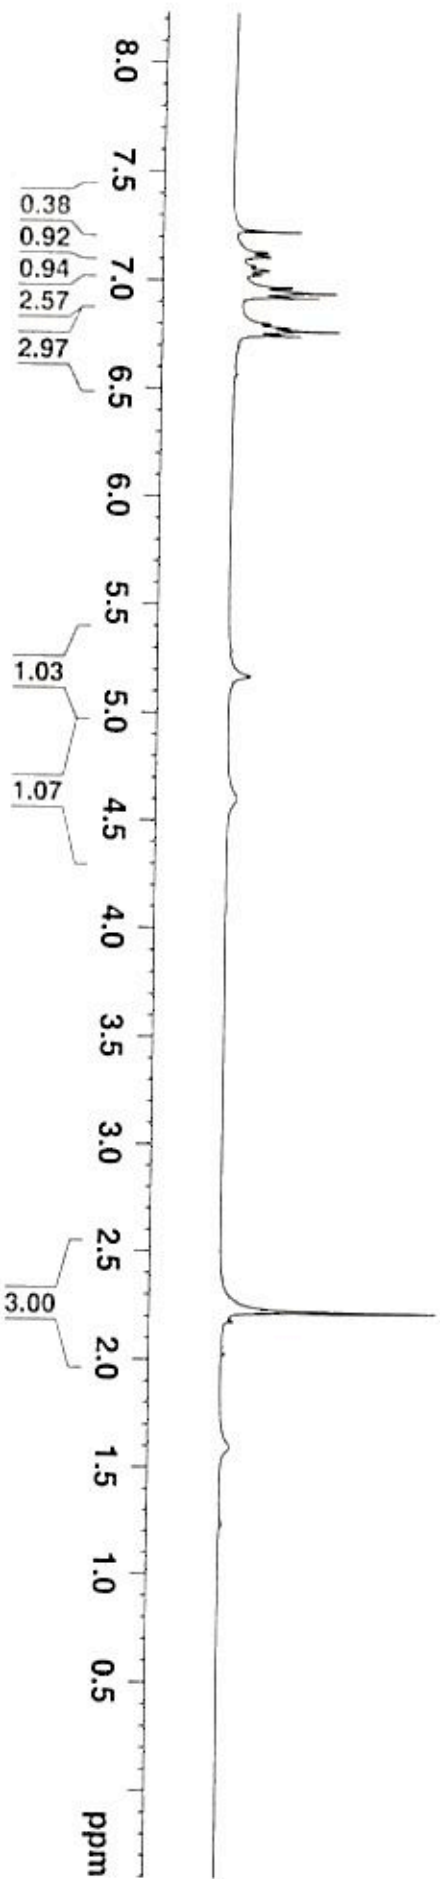

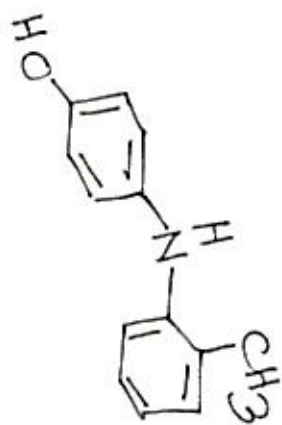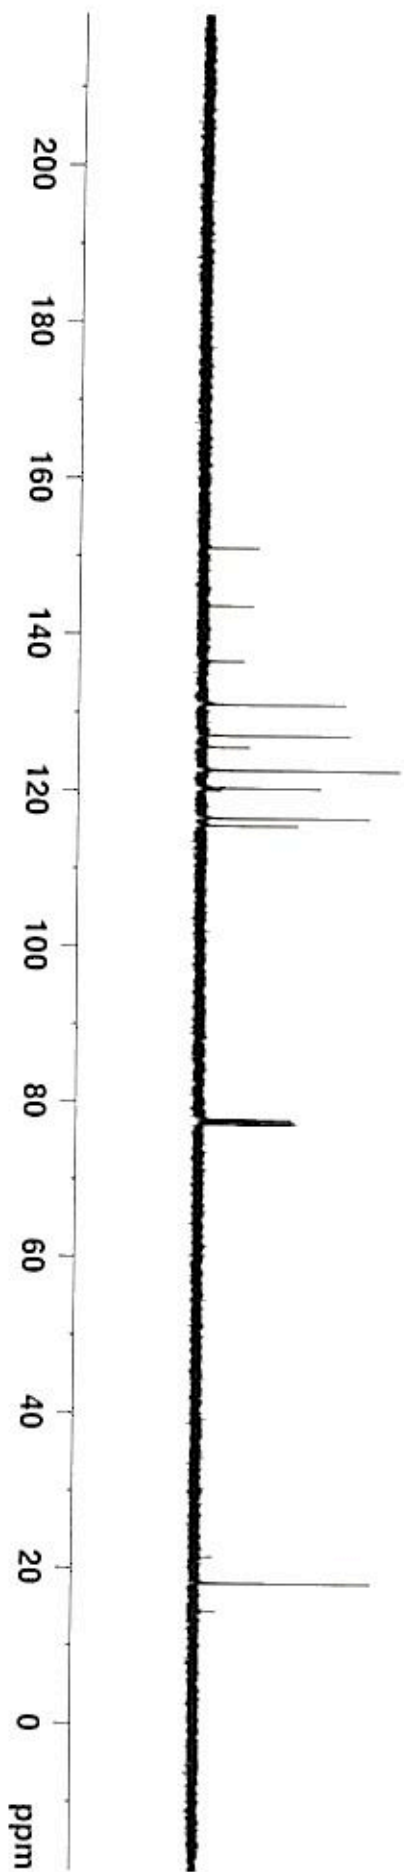

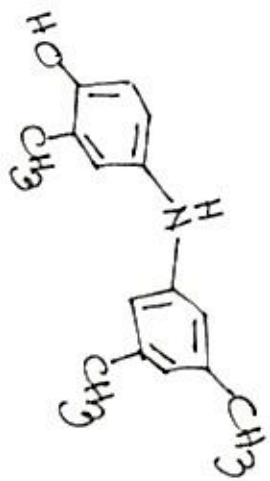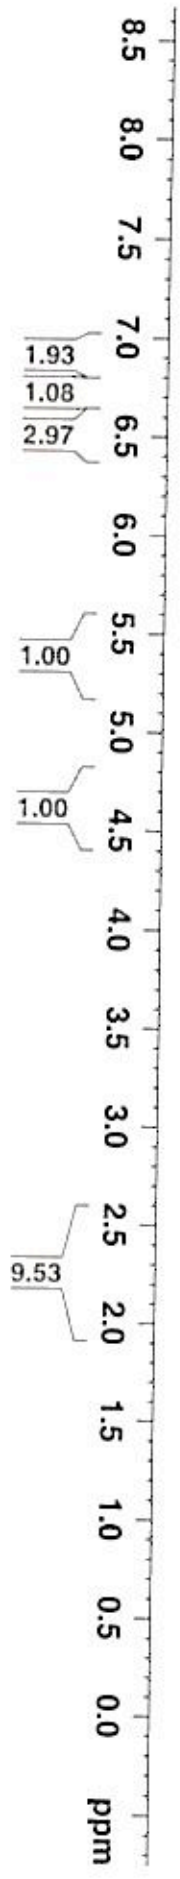



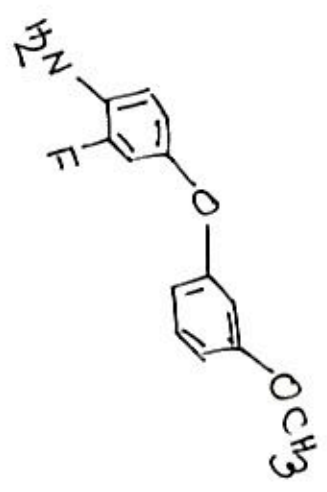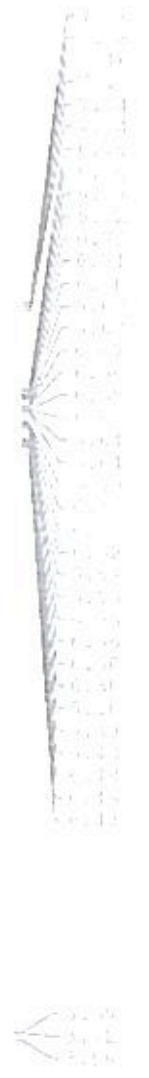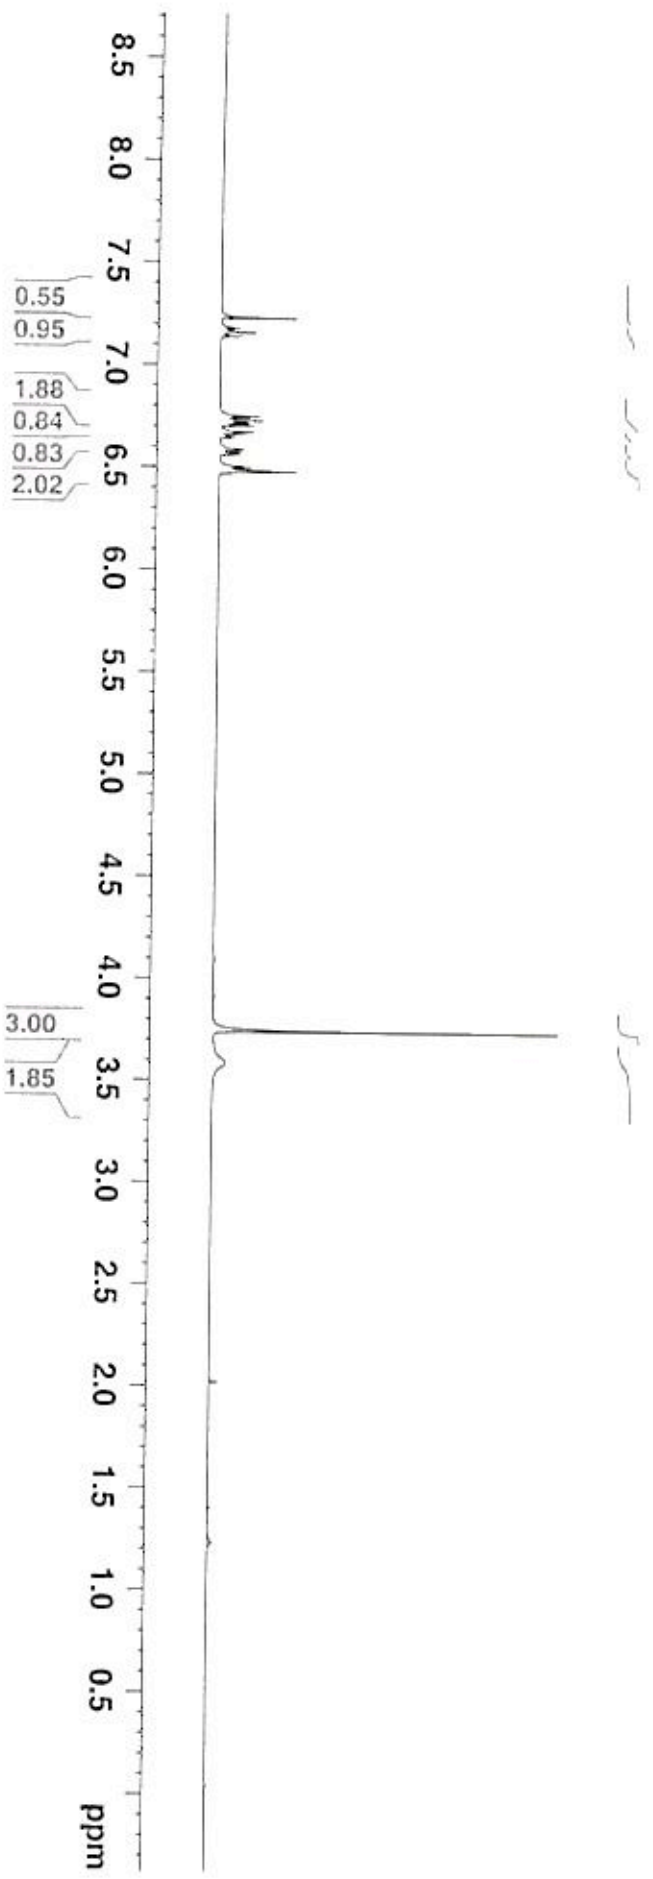

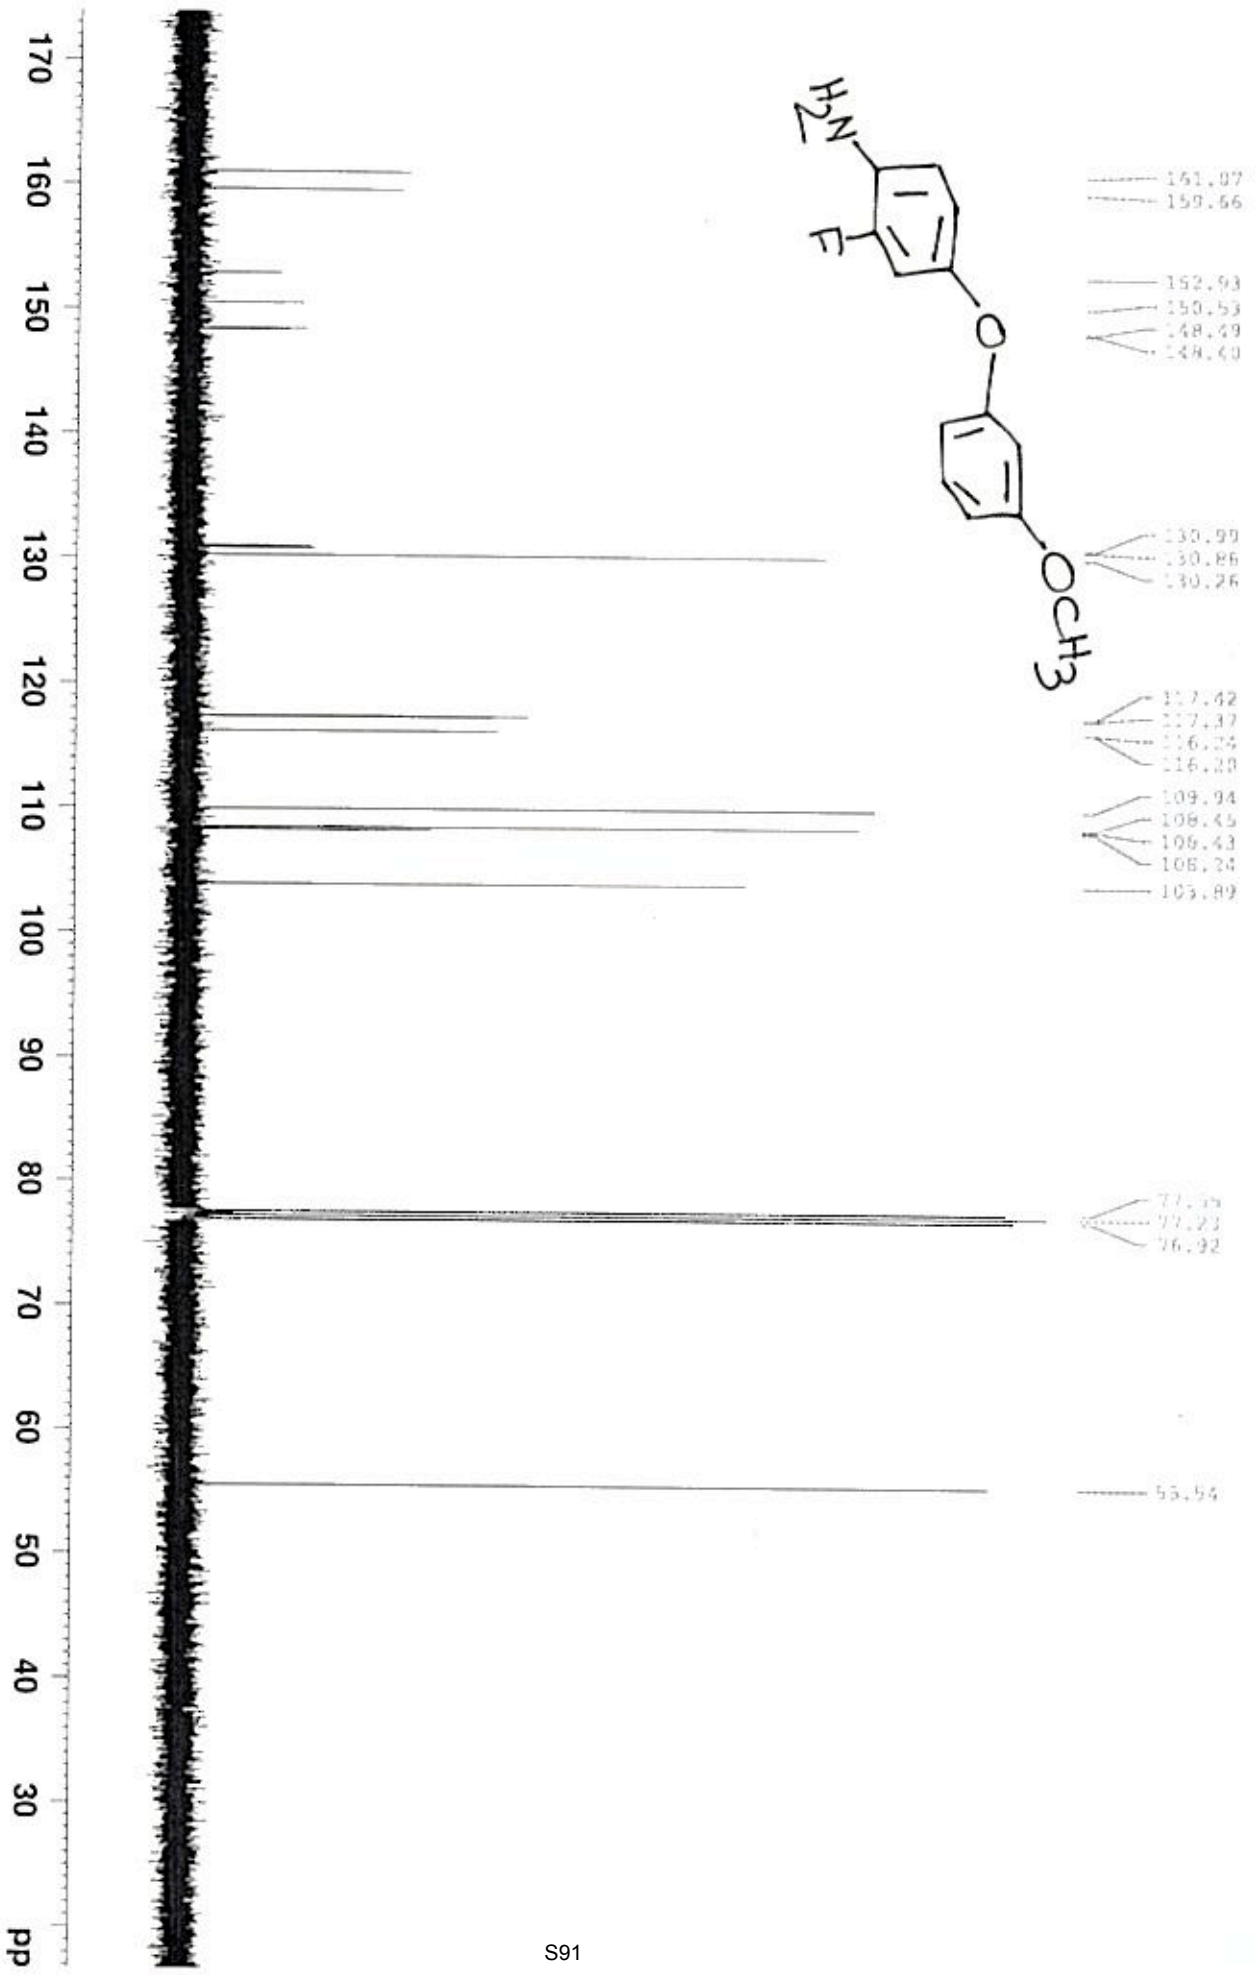

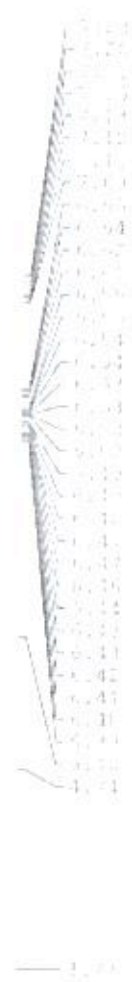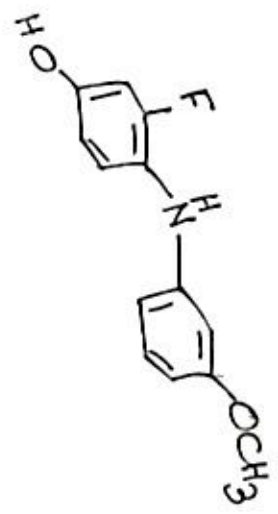

ms - 111

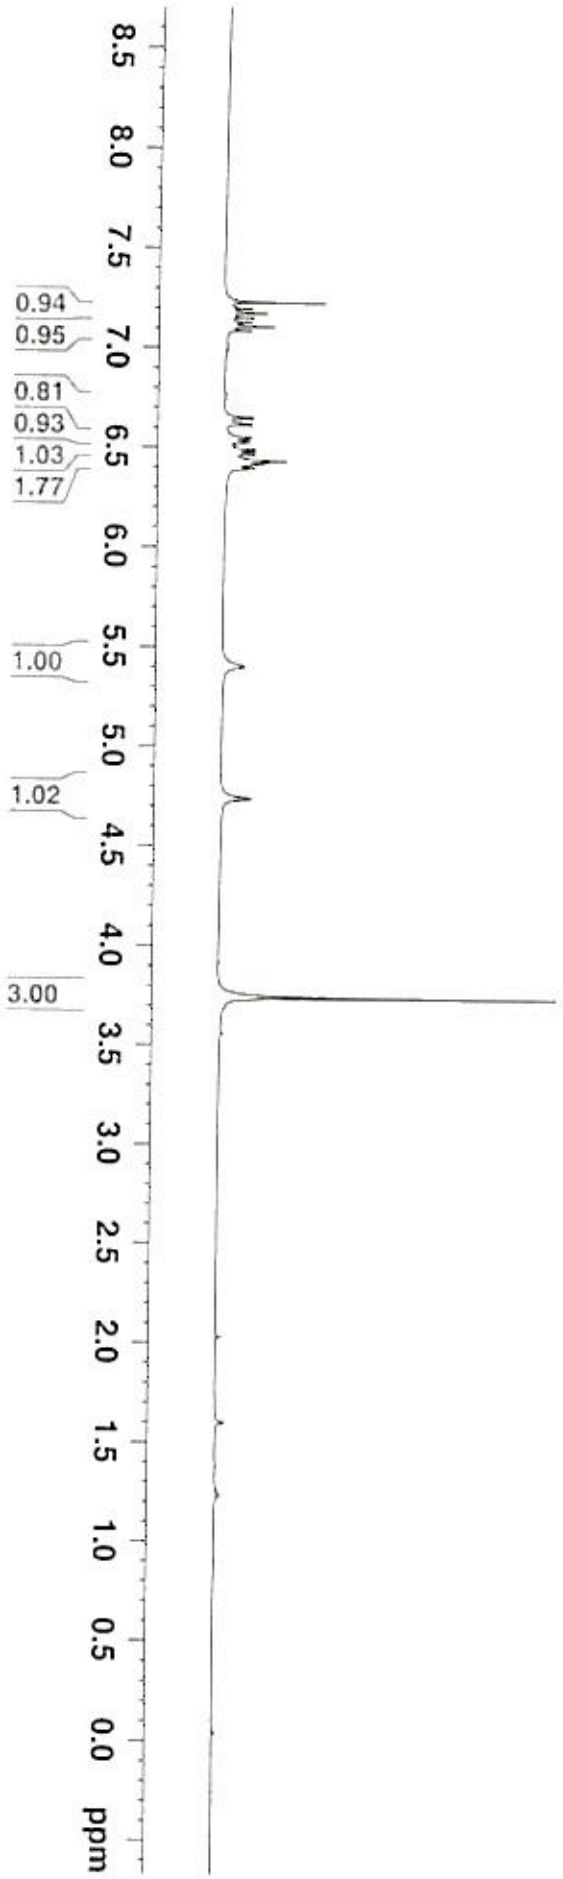





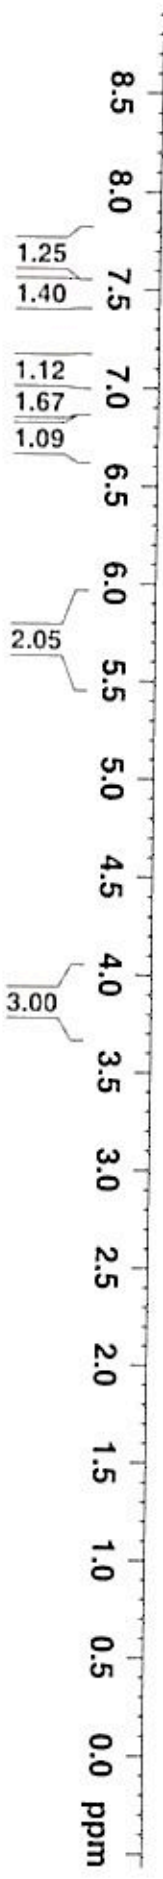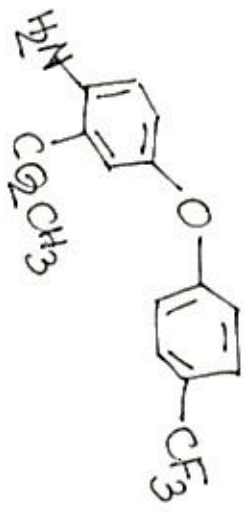

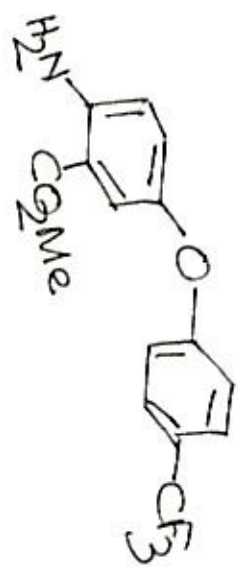

- 161.21
- 141.90
- 127.93
- 127.03
- 127.01
- 127.11
- 124.87
- 124.72
- 121.77
- 120.96
- 118.40
- 119.09
- 111.30

- 77.44
- 77.00
- 76.56

- 55.95

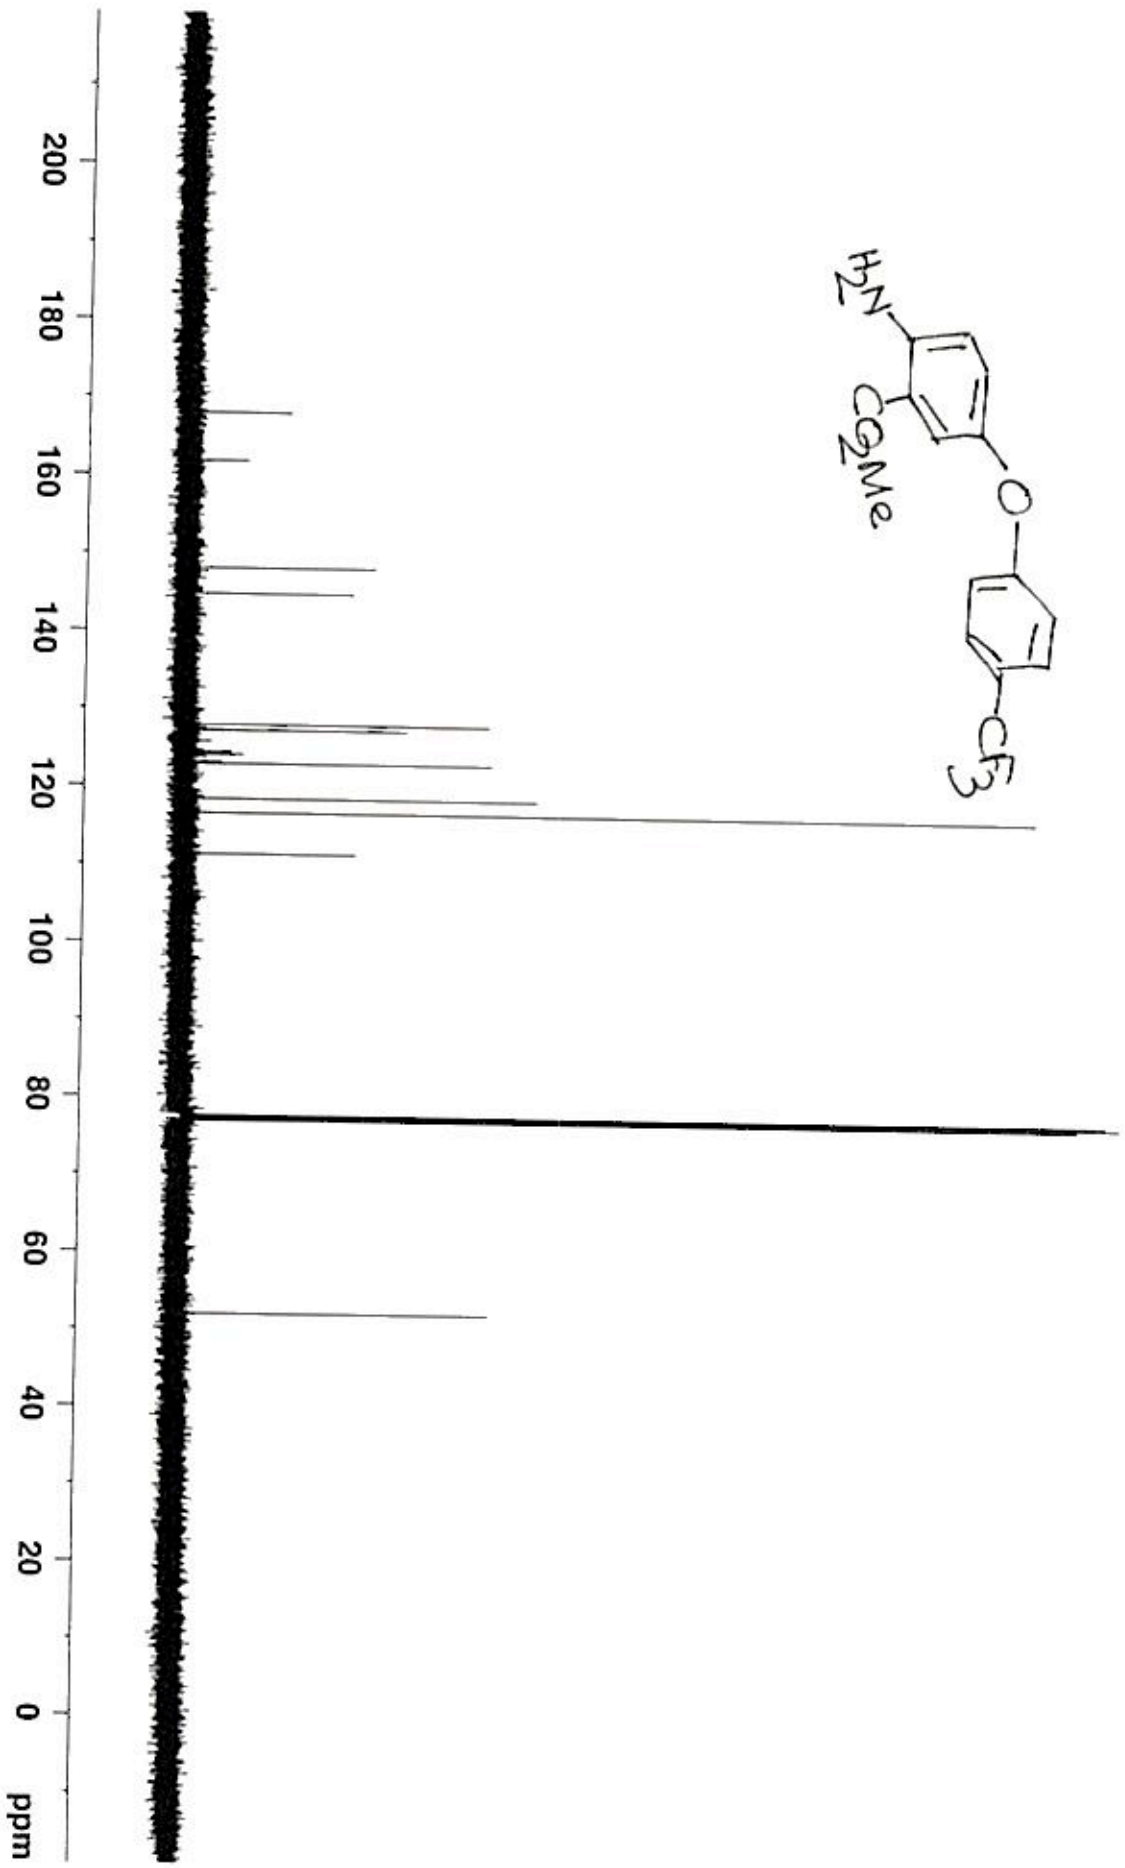

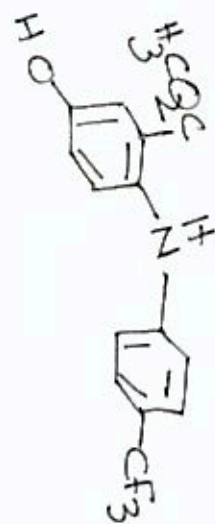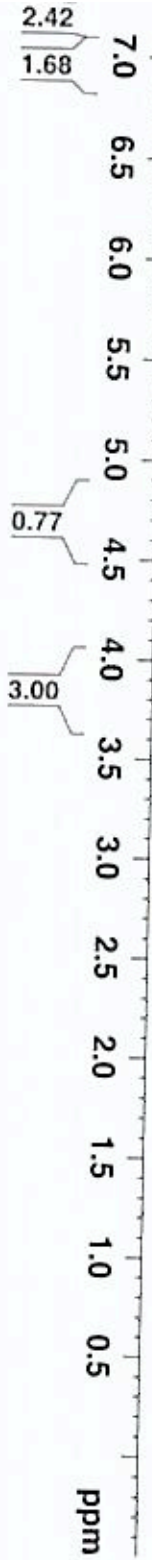

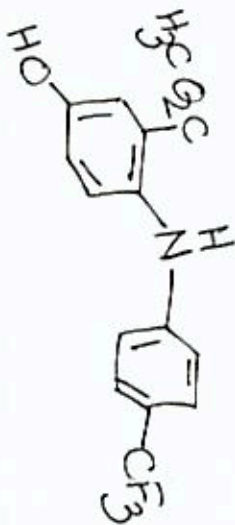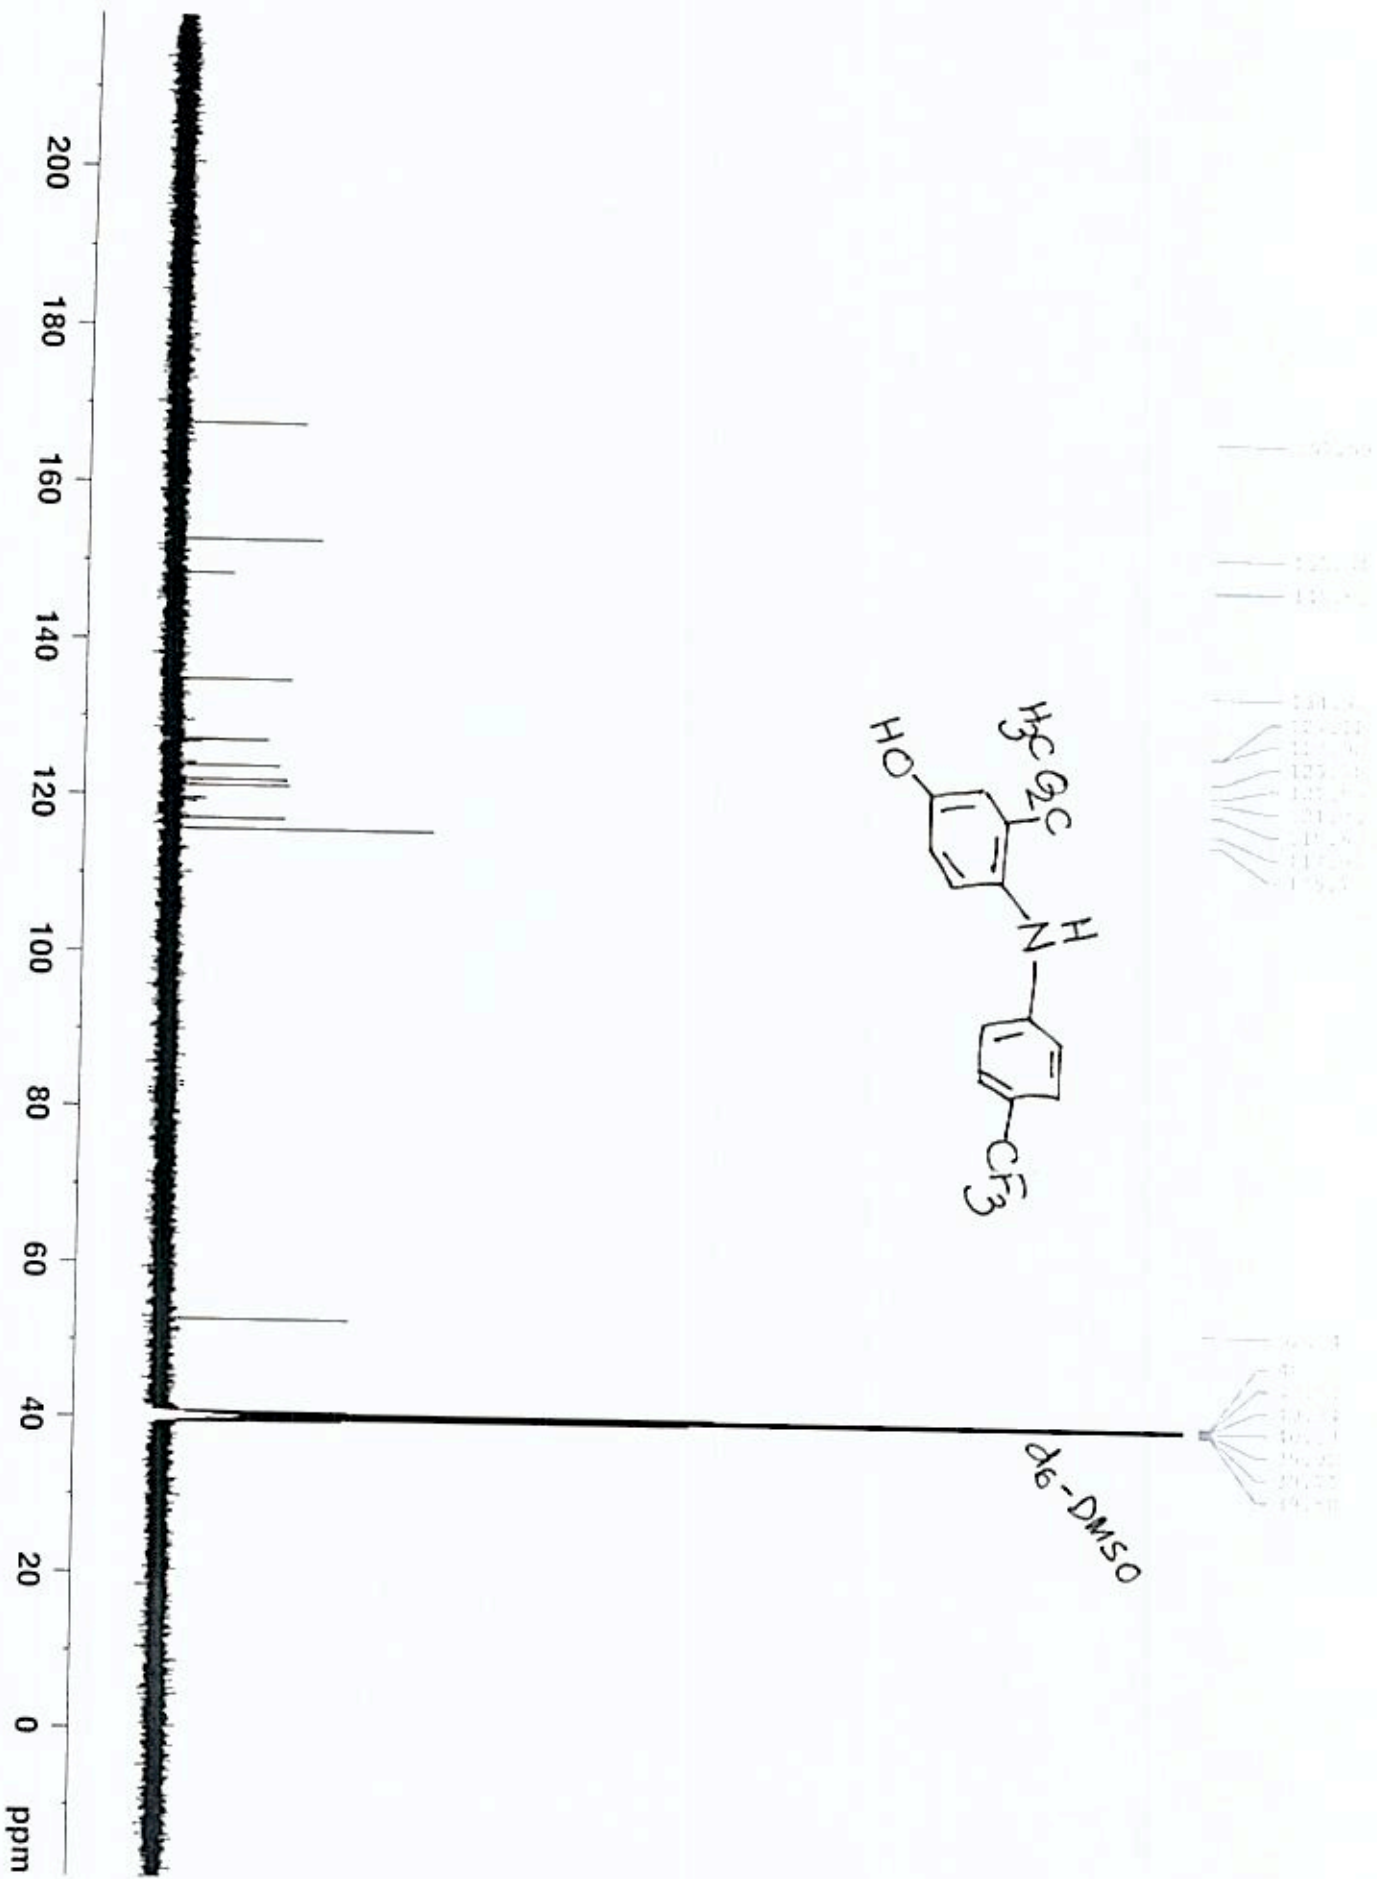

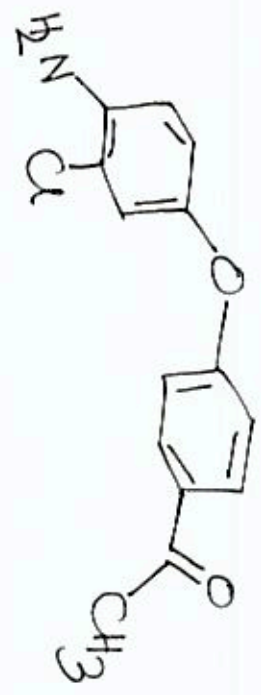

- 7.99
- 7.87
- 7.33
- 7.00
- 6.91
- 6.89
- 6.82
- 6.81
- 6.79
- 6.75
- 6.76
- 5.74
- 4.09
- 4.07
- 4.06
- 2.53
- 2.02

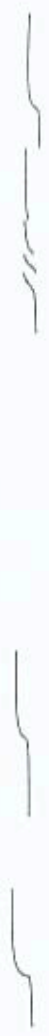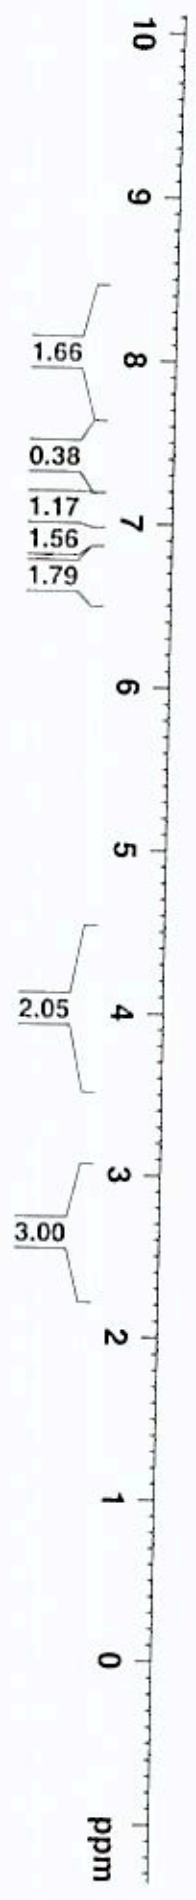

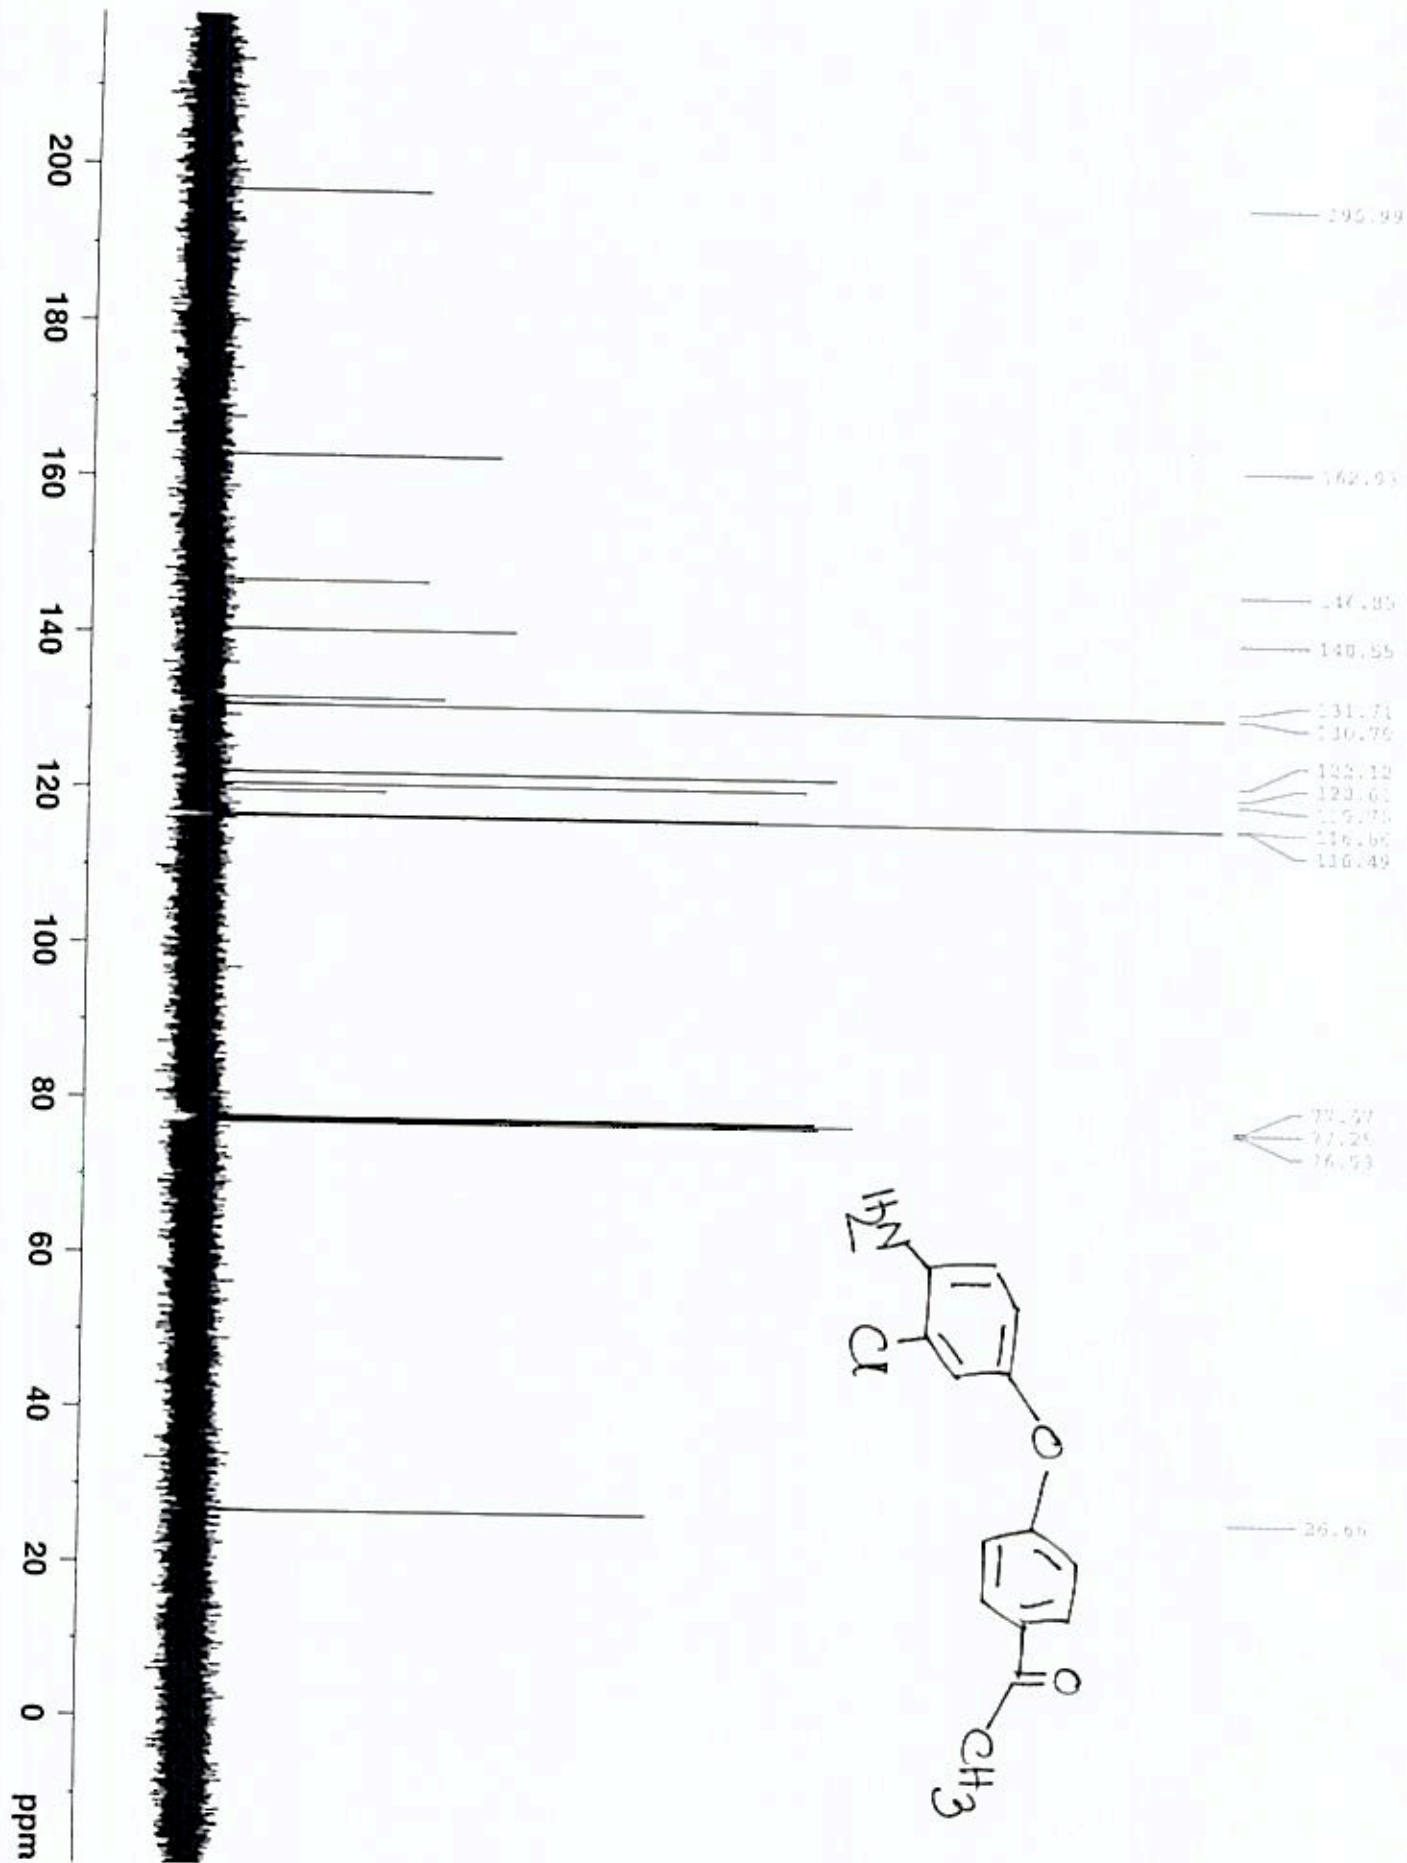

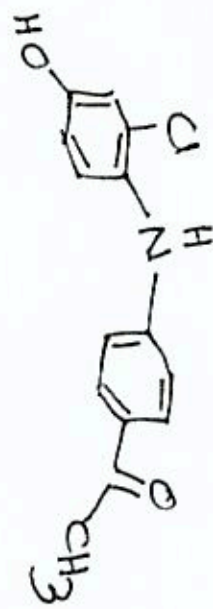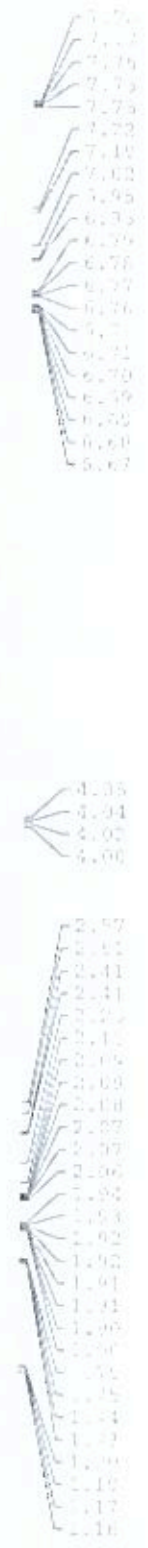

Handwritten integration values: 2.00, 2.03, 0.98, 1.20, 3.22.

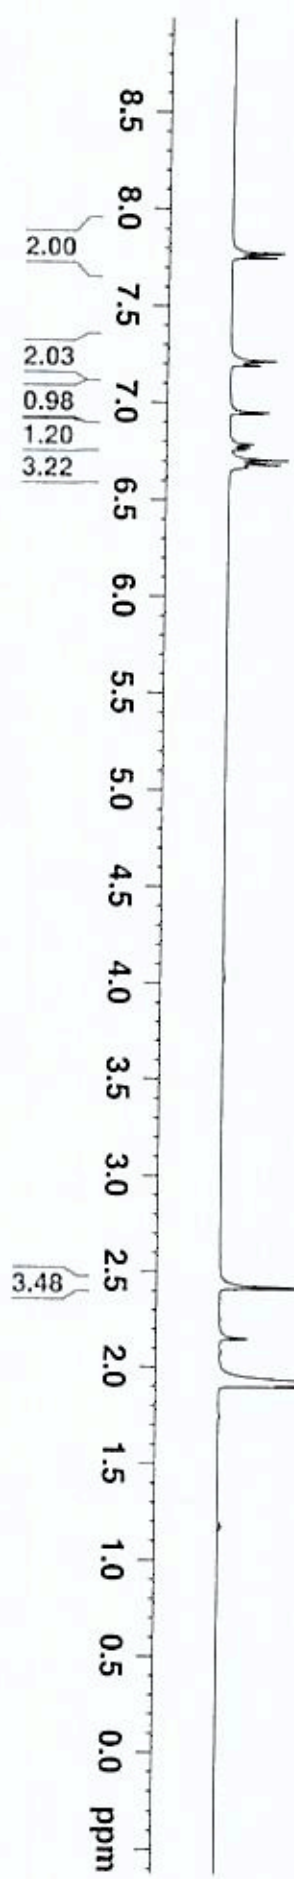

CD<sub>3</sub>CN





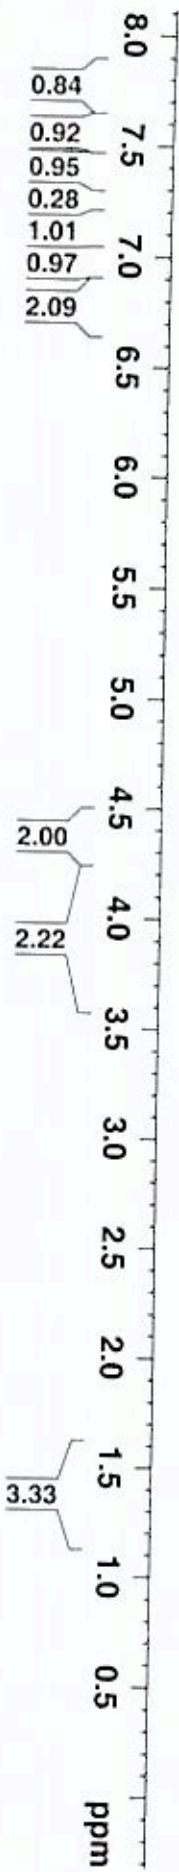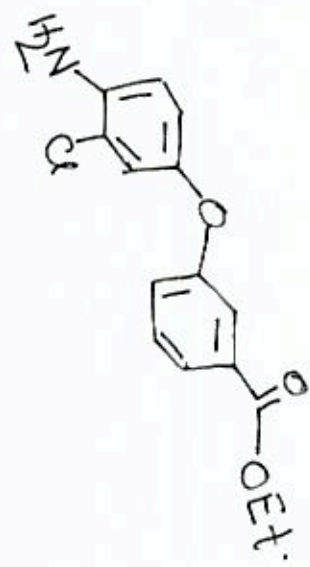

200 190 180 170 160 150 140 130 120 110 100 90 80 70 60 50 40 30 20 10 0 ppm

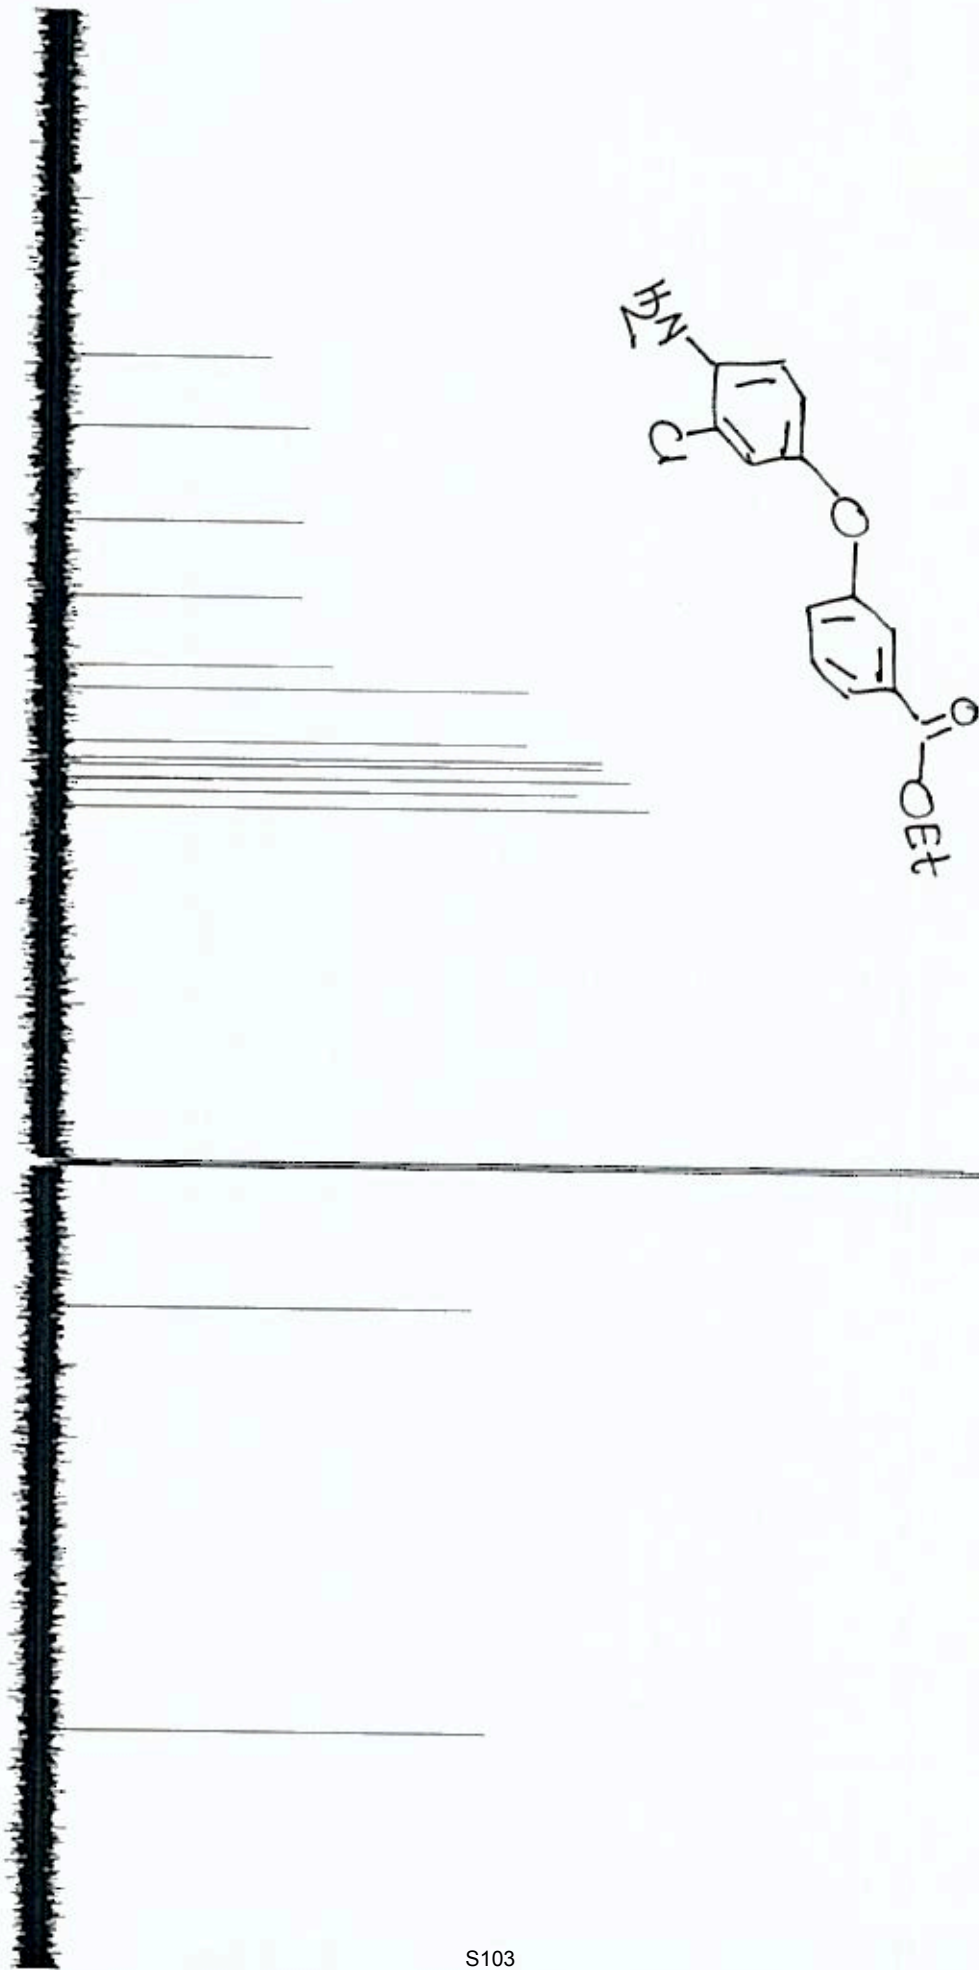

- 166.31
- 158.59
- 148.18
- 139.89
- 133.36
- 129.81
- 123.92
- 122.10
- 121.30
- 119.92
- 118.49
- 116.74
- 77.55
- 77.23
- 76.91
- 61.36
- 14.50

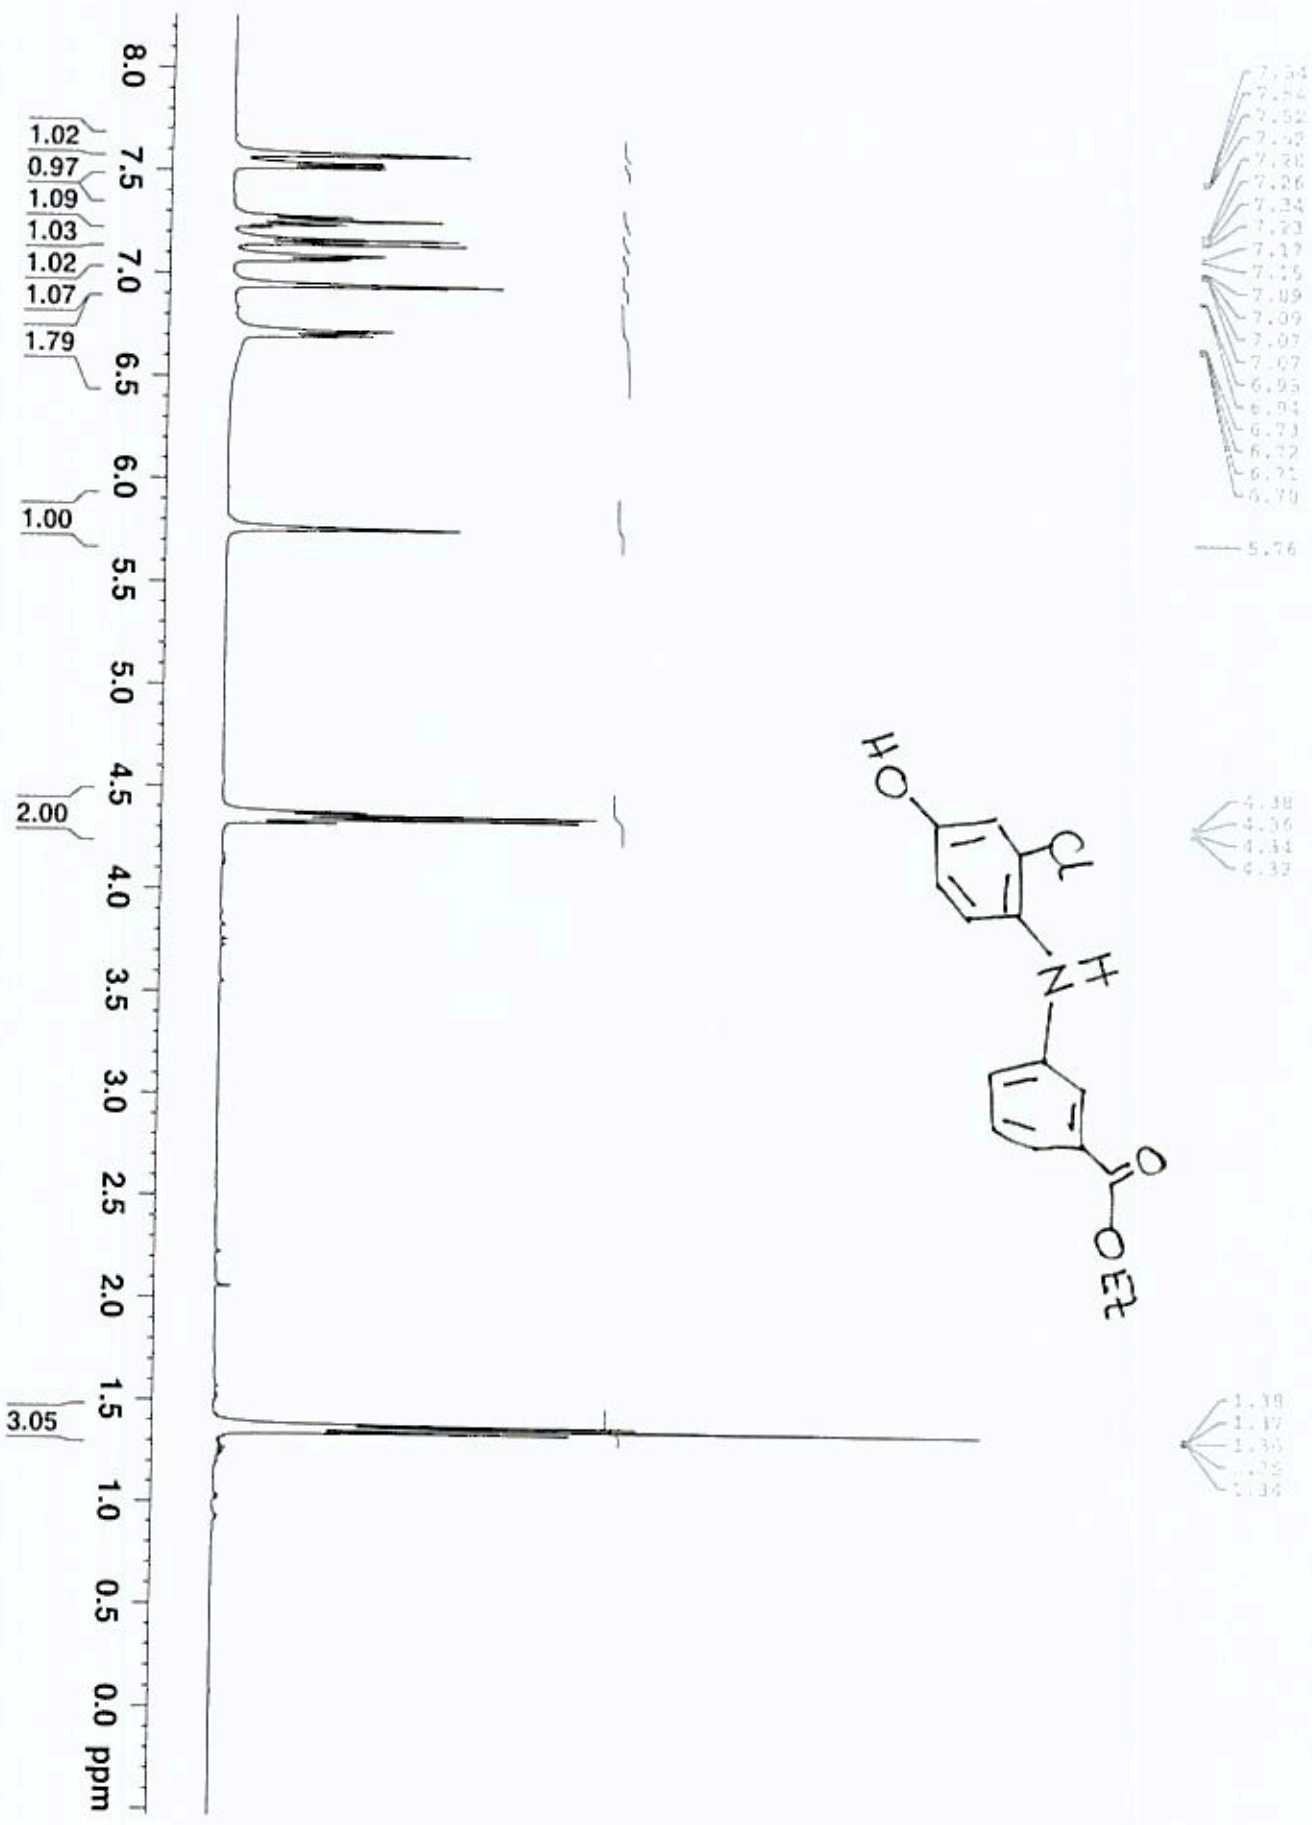

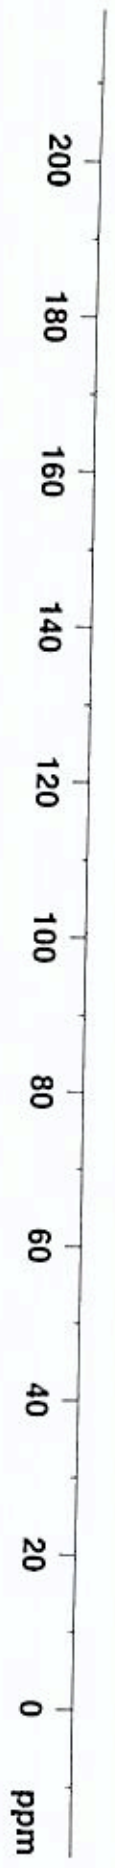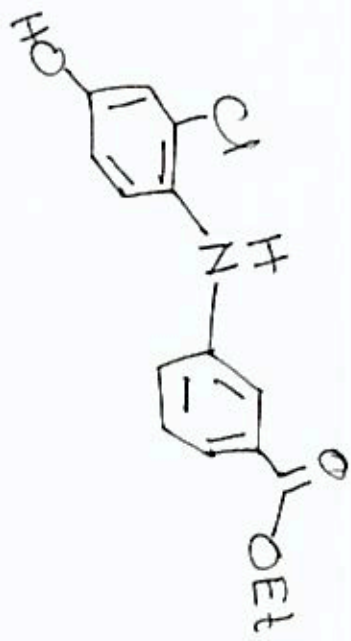

- 167.78
- 152.66
- 146.57
- 131.95
- 131.43
- 129.62
- 126.47
- 122.23
- 121.66
- 121.15
- 117.38
- 117.26
- 115.13
- 77.61
- 77.29
- 76.97
- 61.71
- 14.43

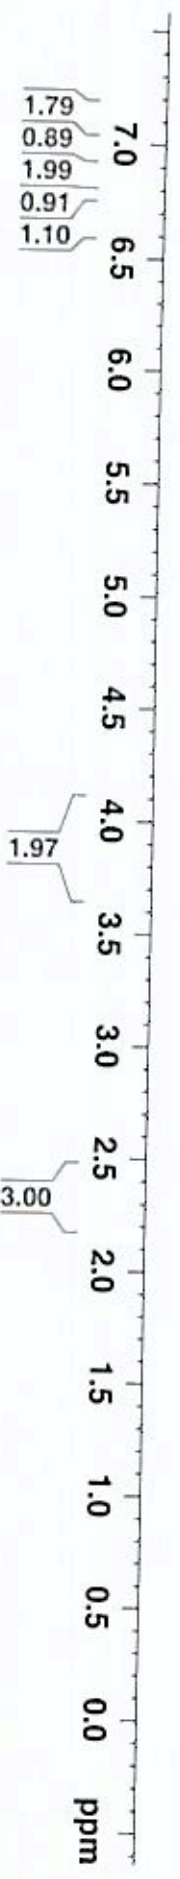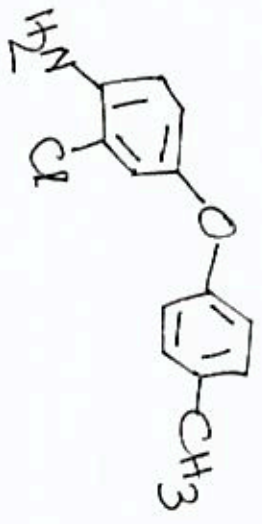

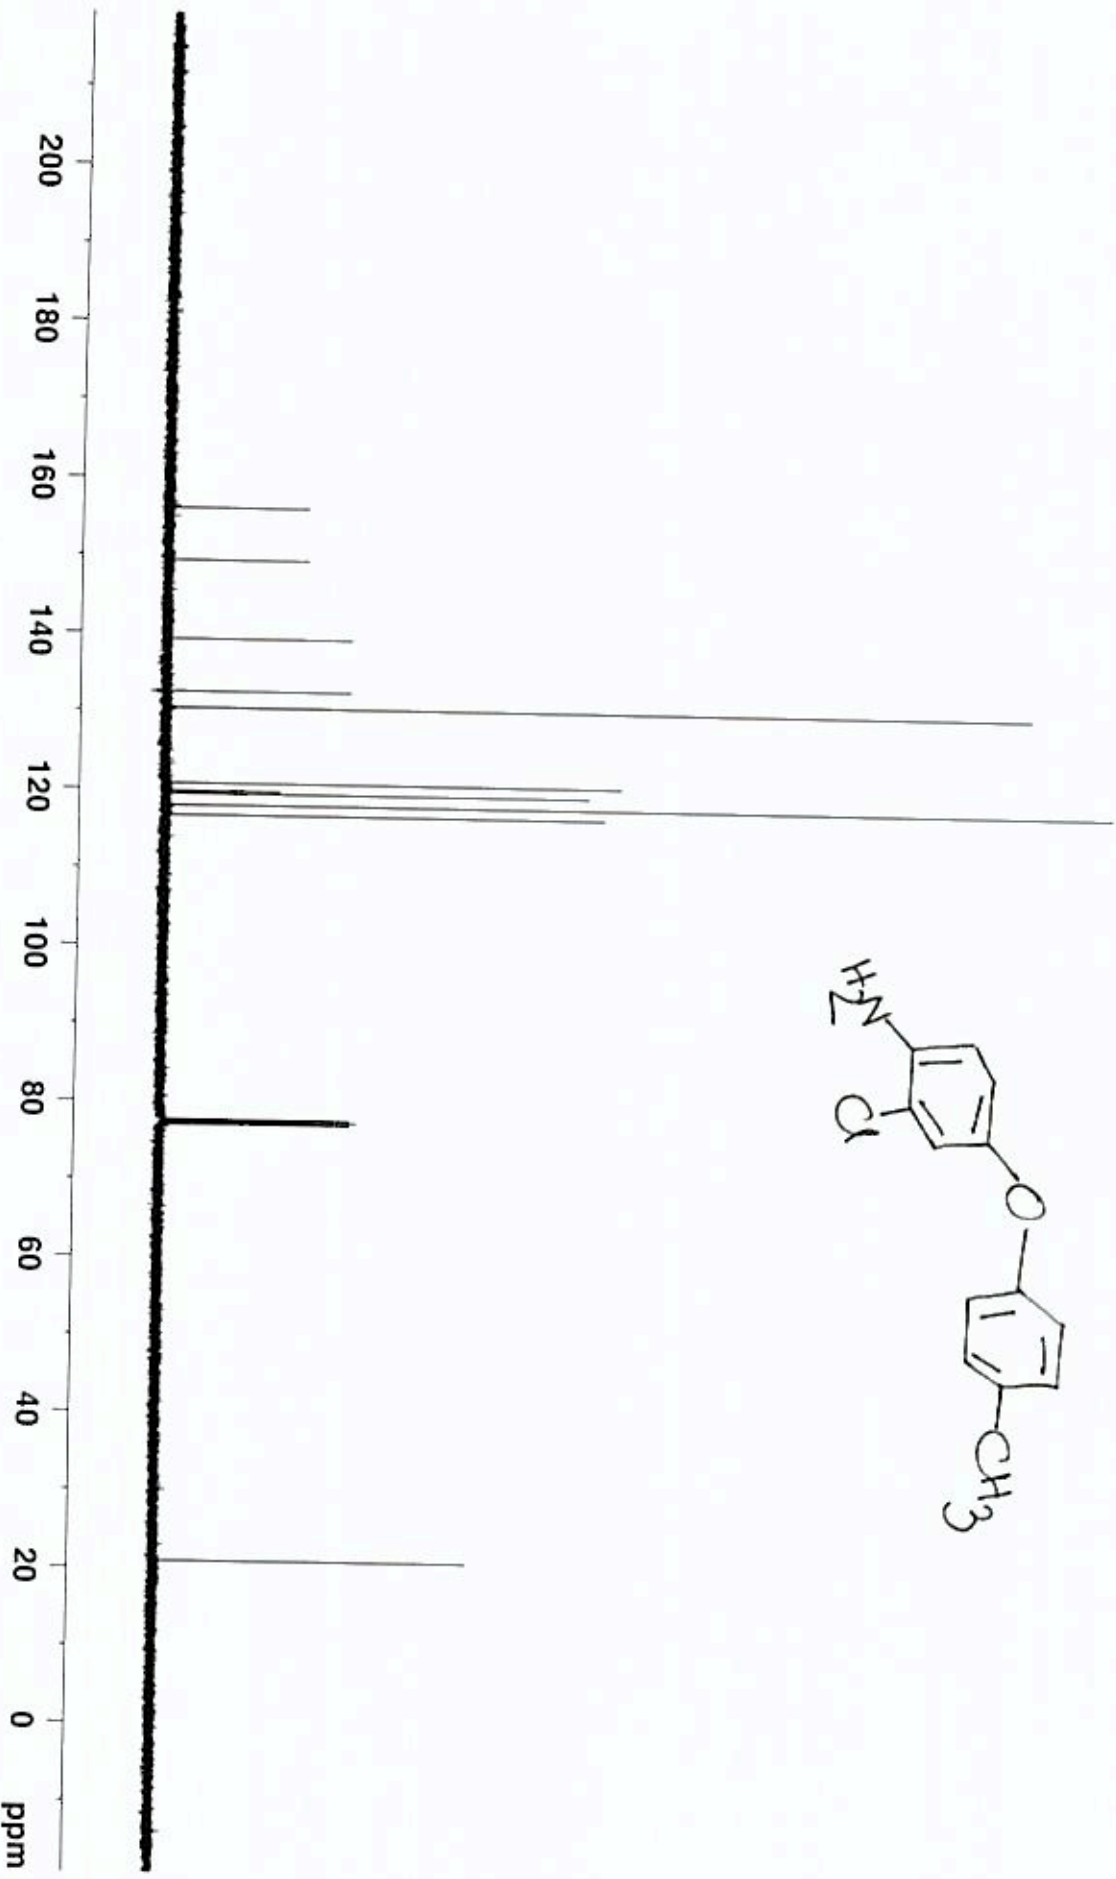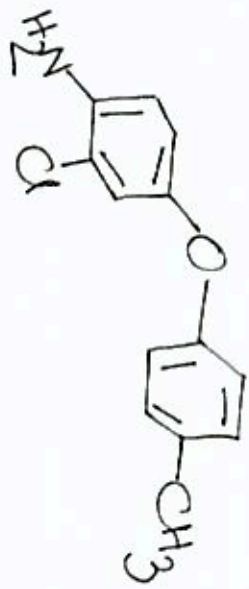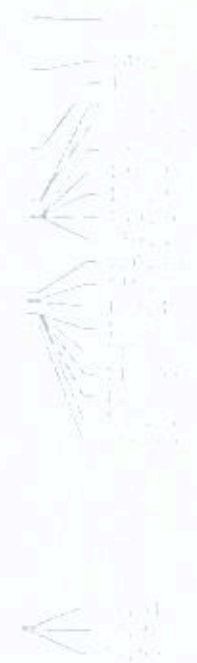



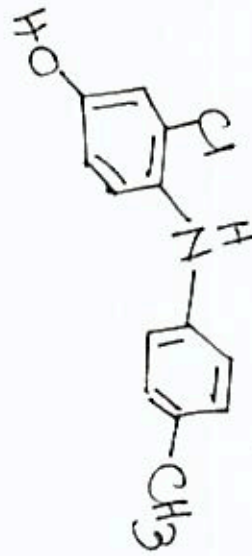

- 7.24
- 7.23
- 7.20
- 7.05
- 7.07
- 6.94
- 6.93
- 6.92
- 6.91
- 6.90
- 6.89
- 6.88
- 6.87
- 6.86
- 6.85
- 5.00
- 4.62
- 2.30

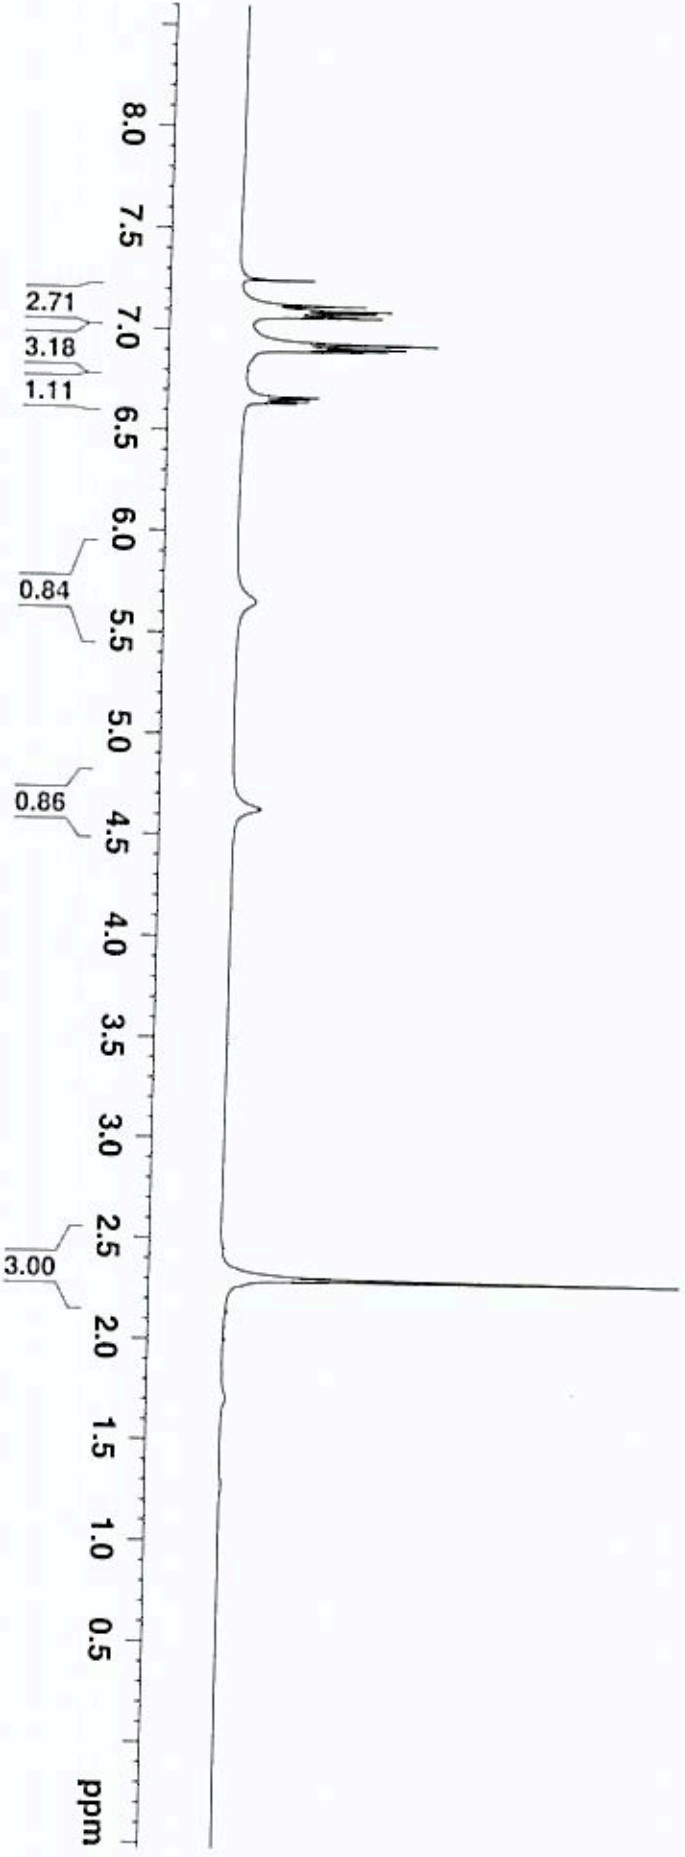



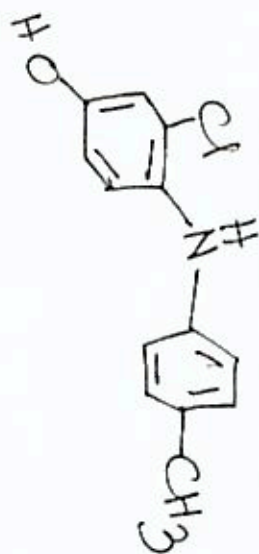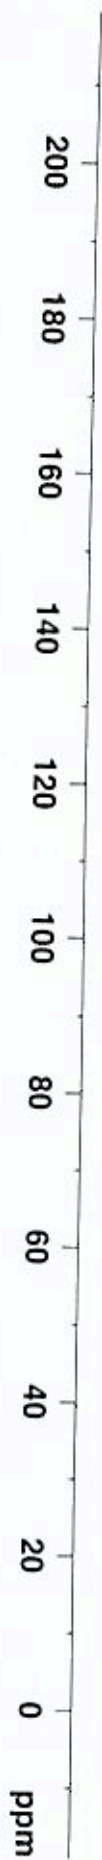

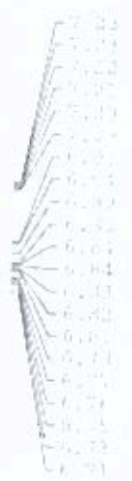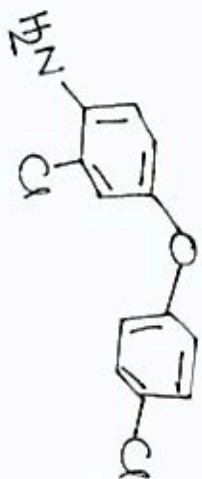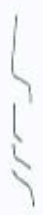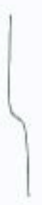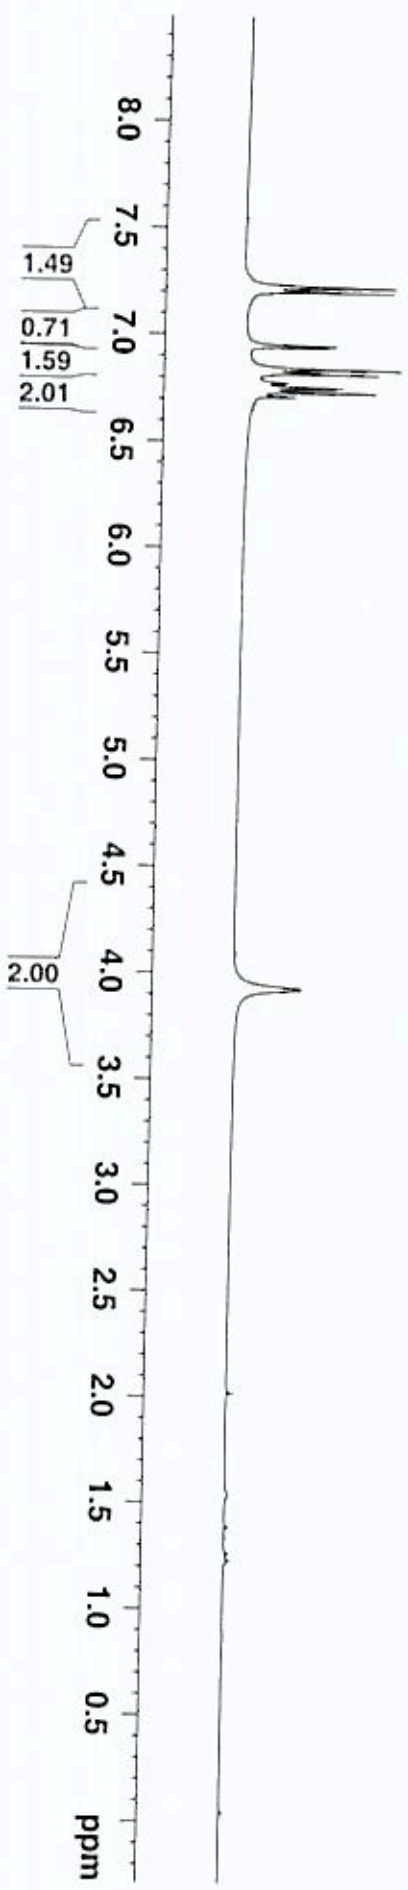

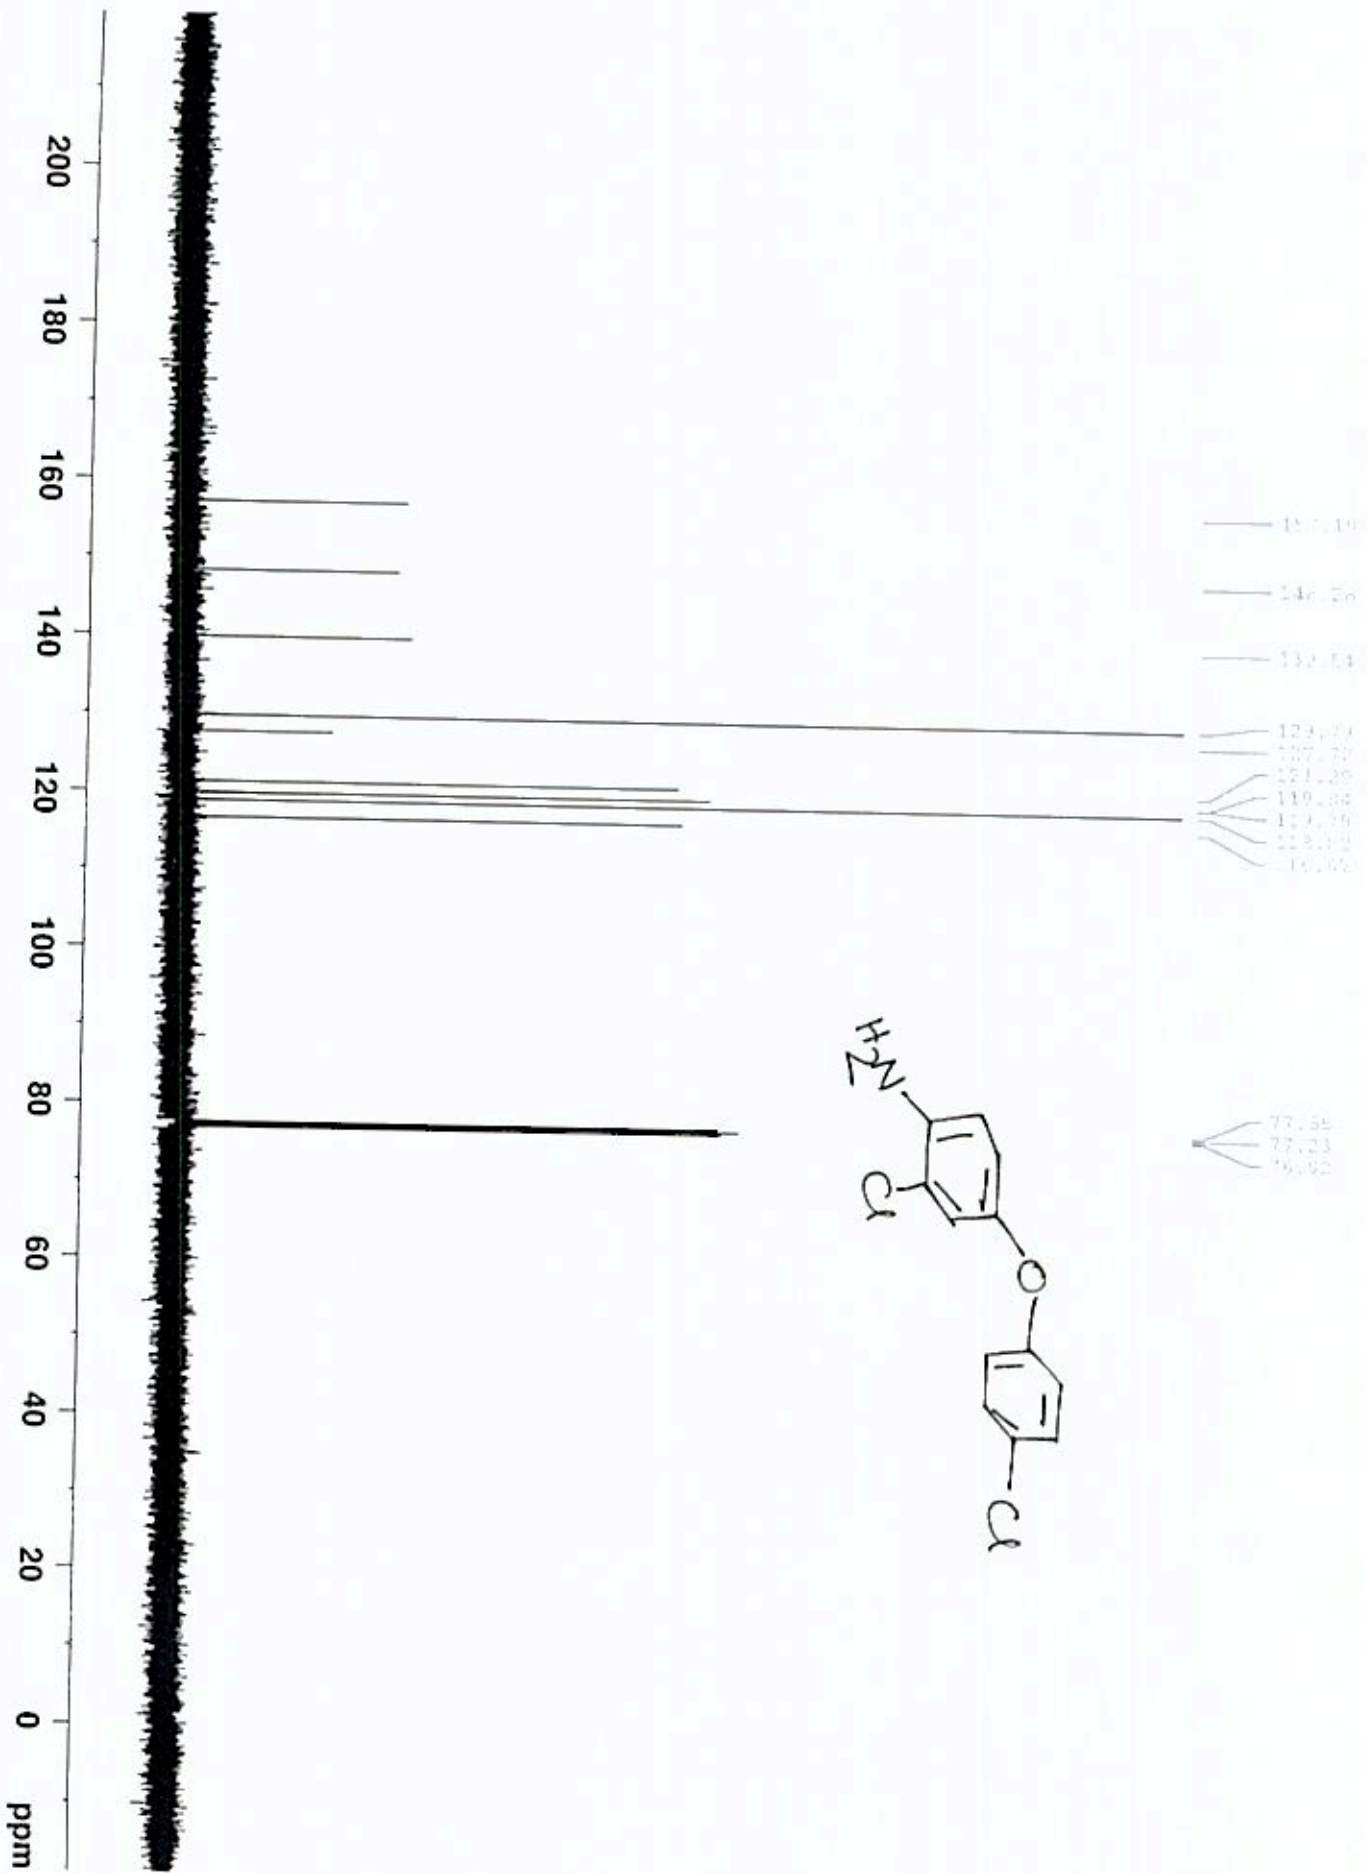

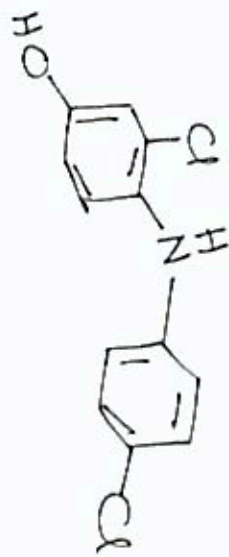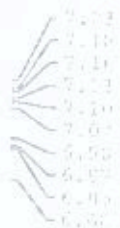

3.75  
3.13

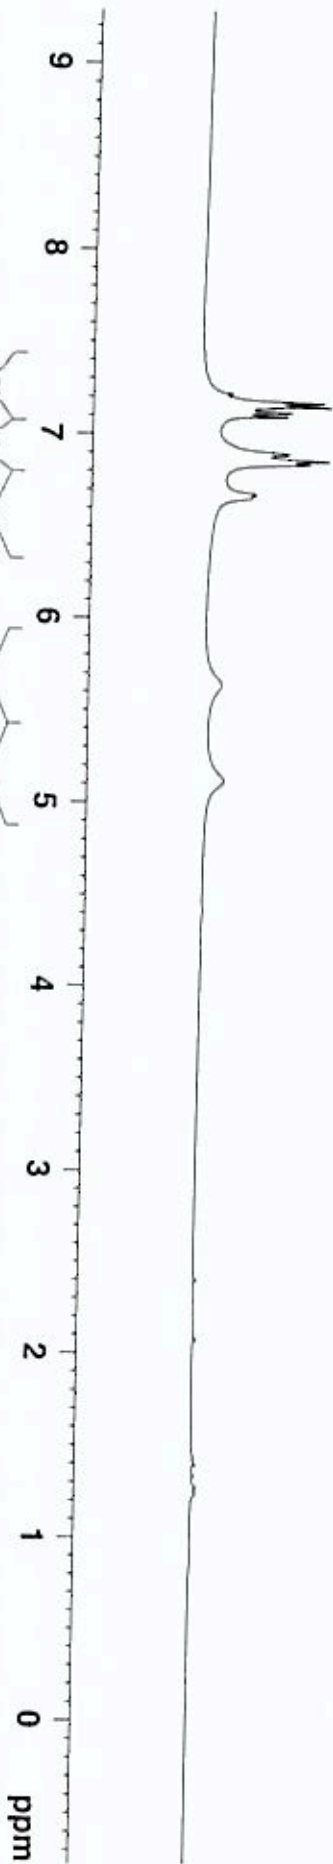

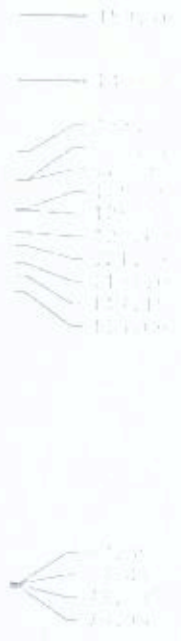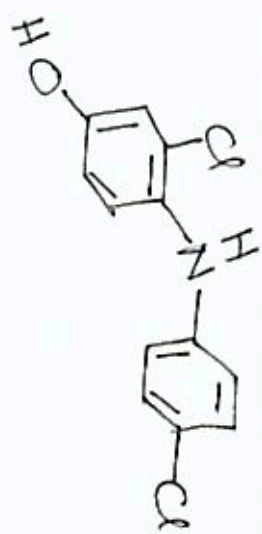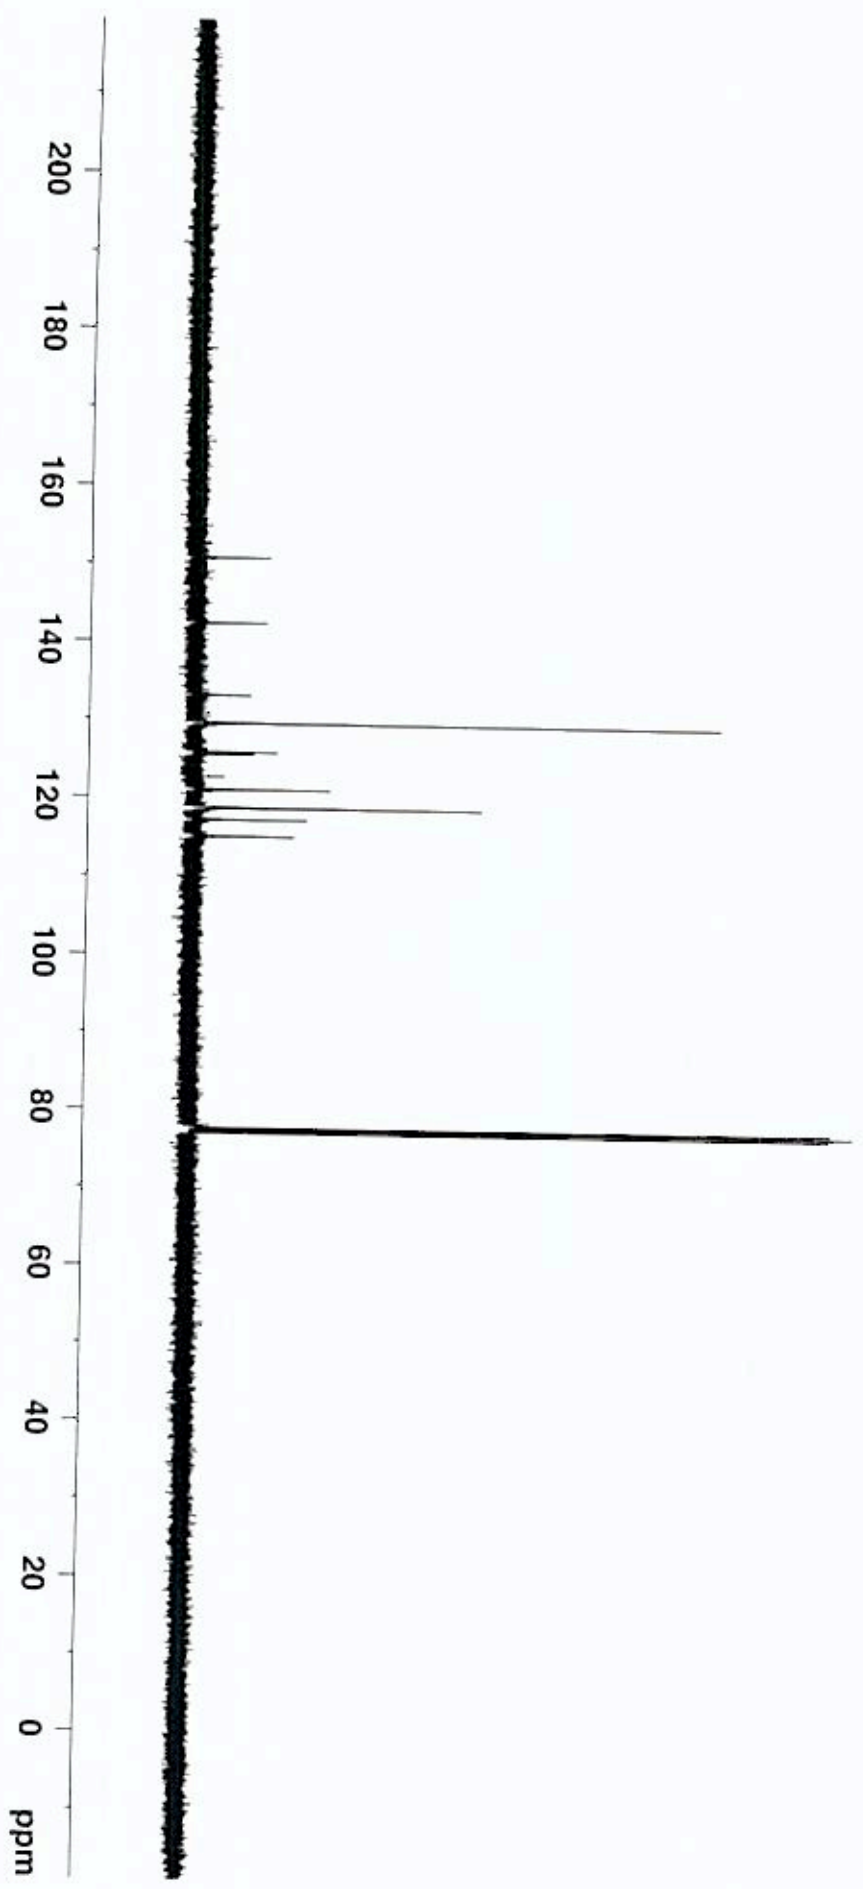

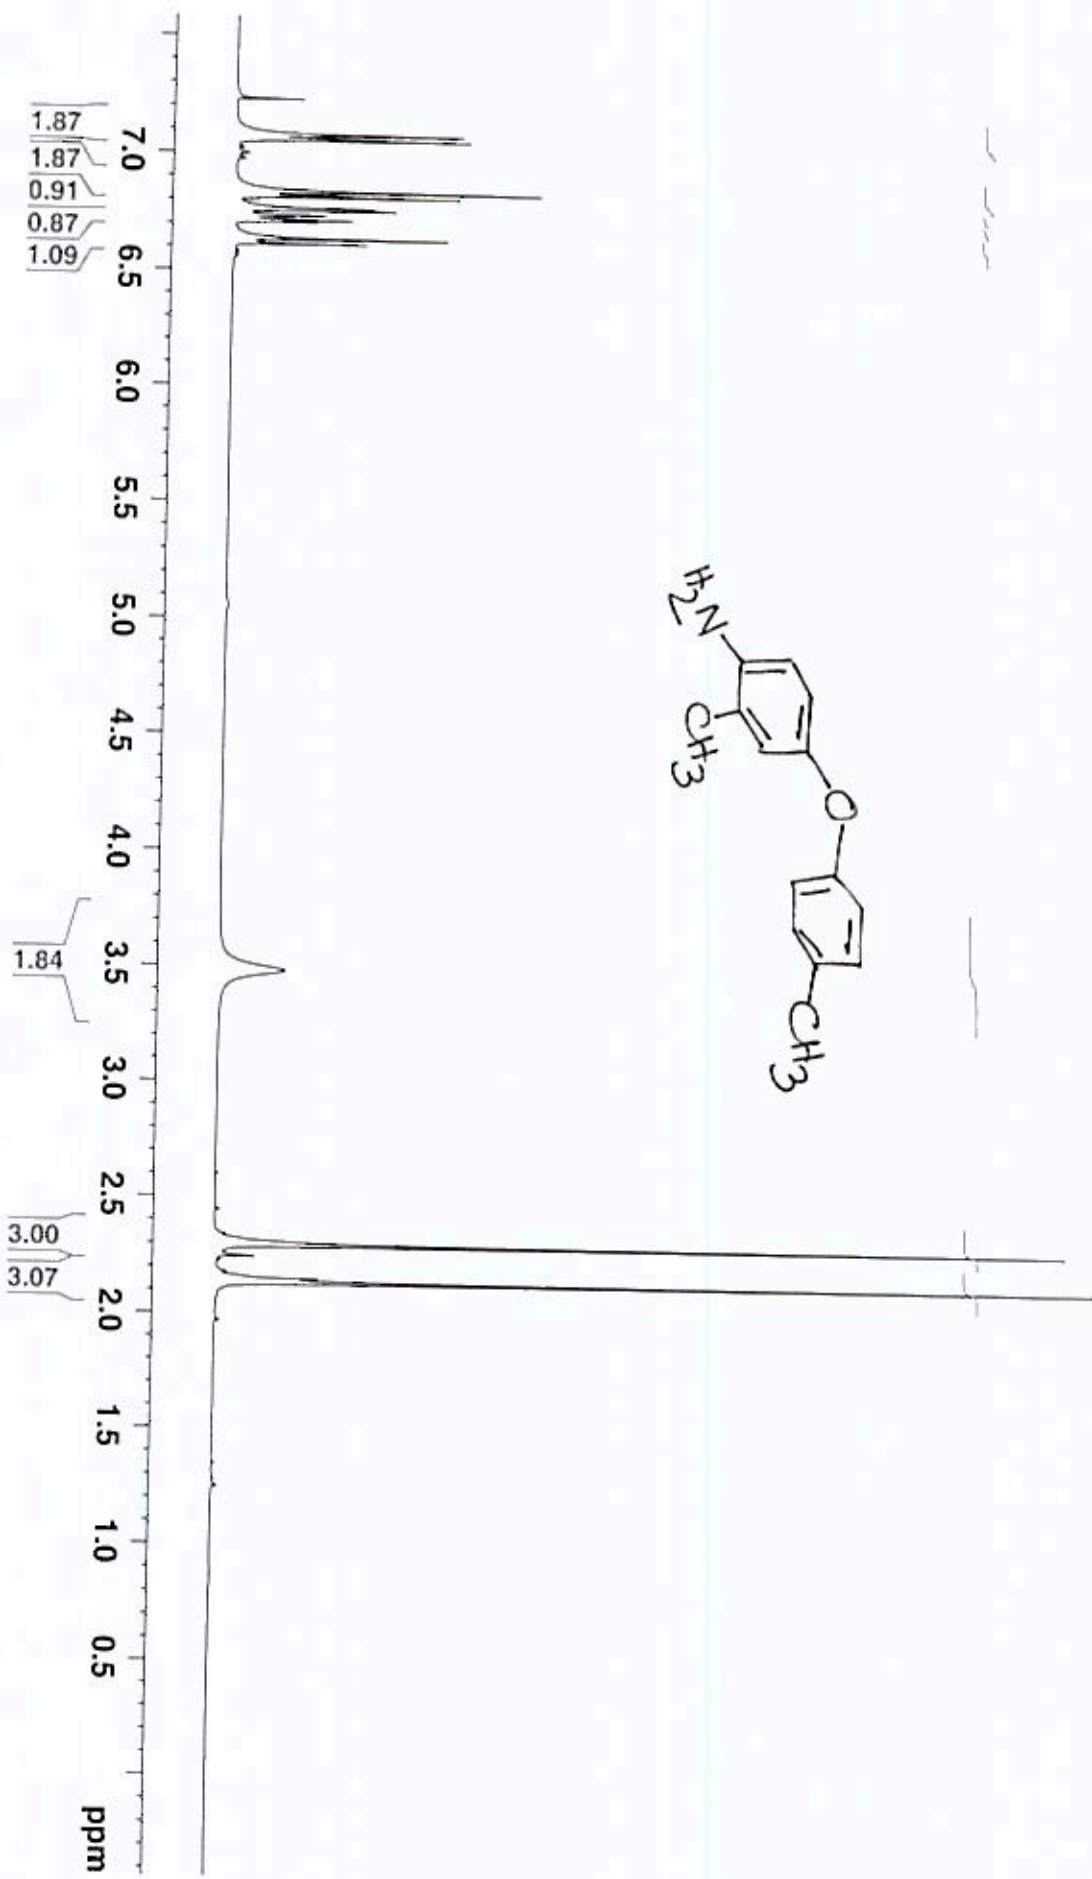

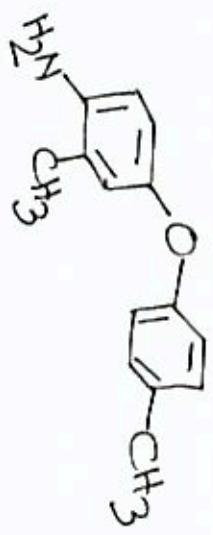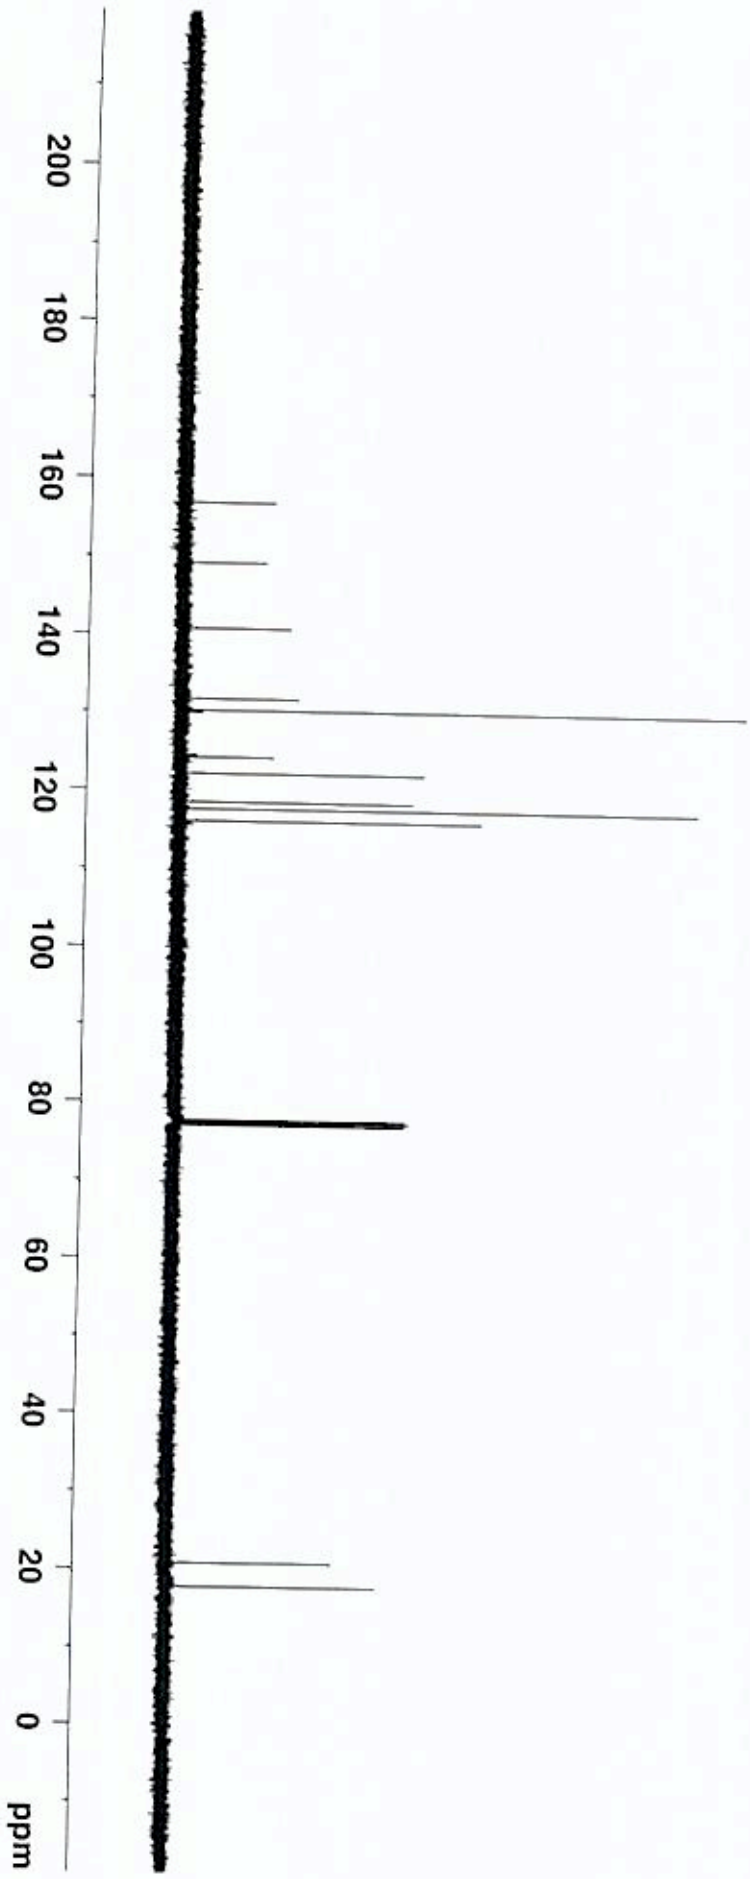

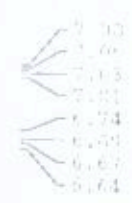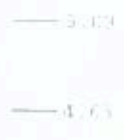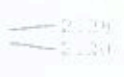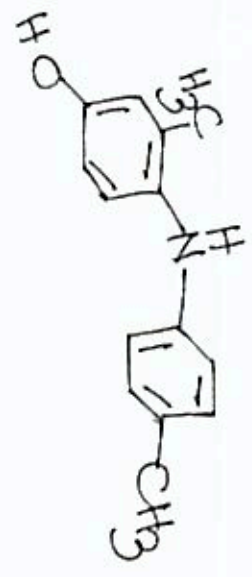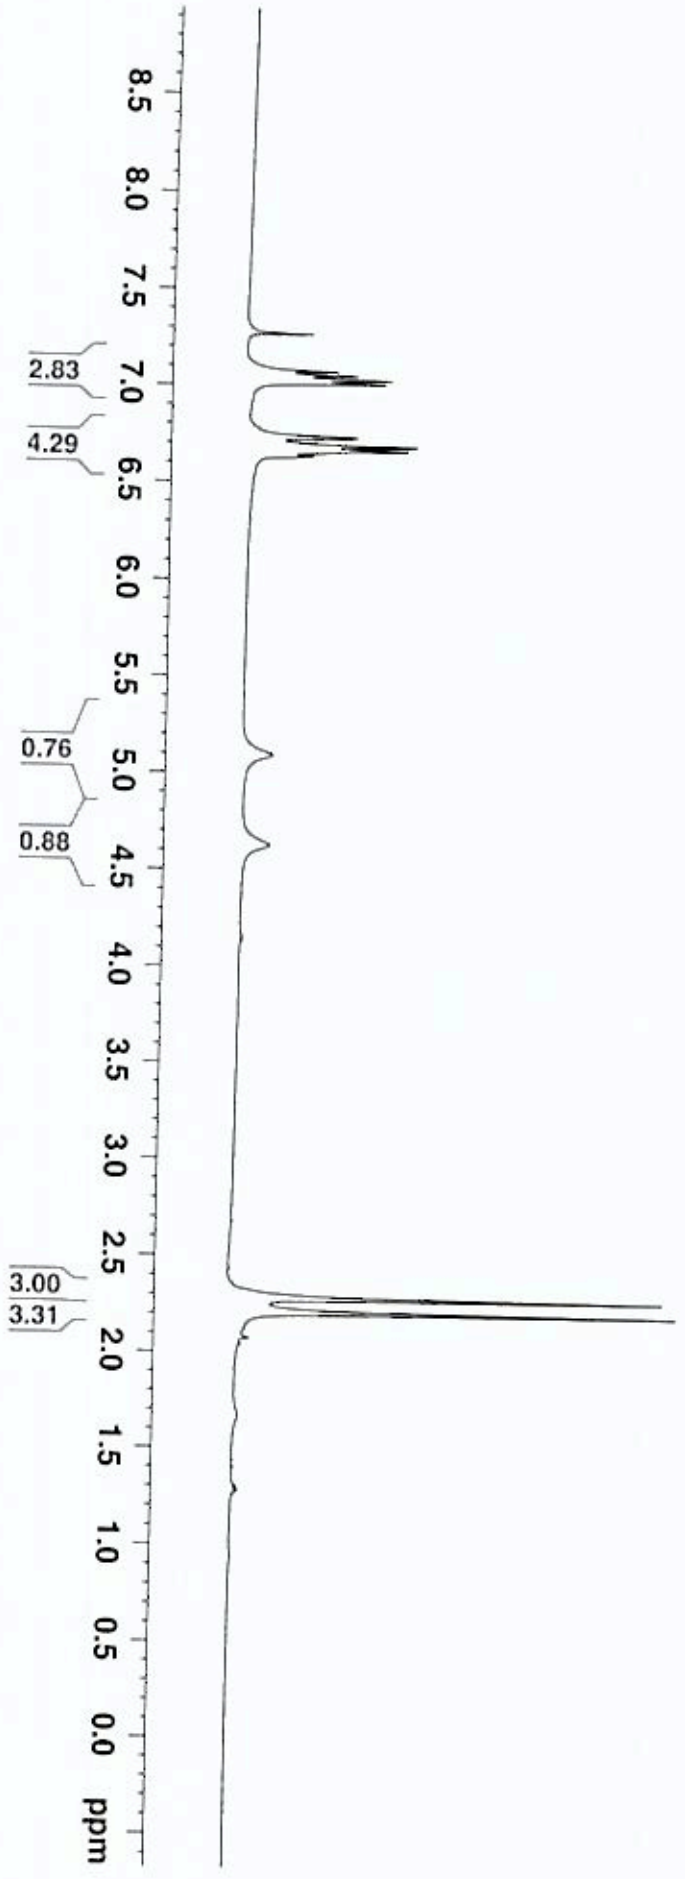



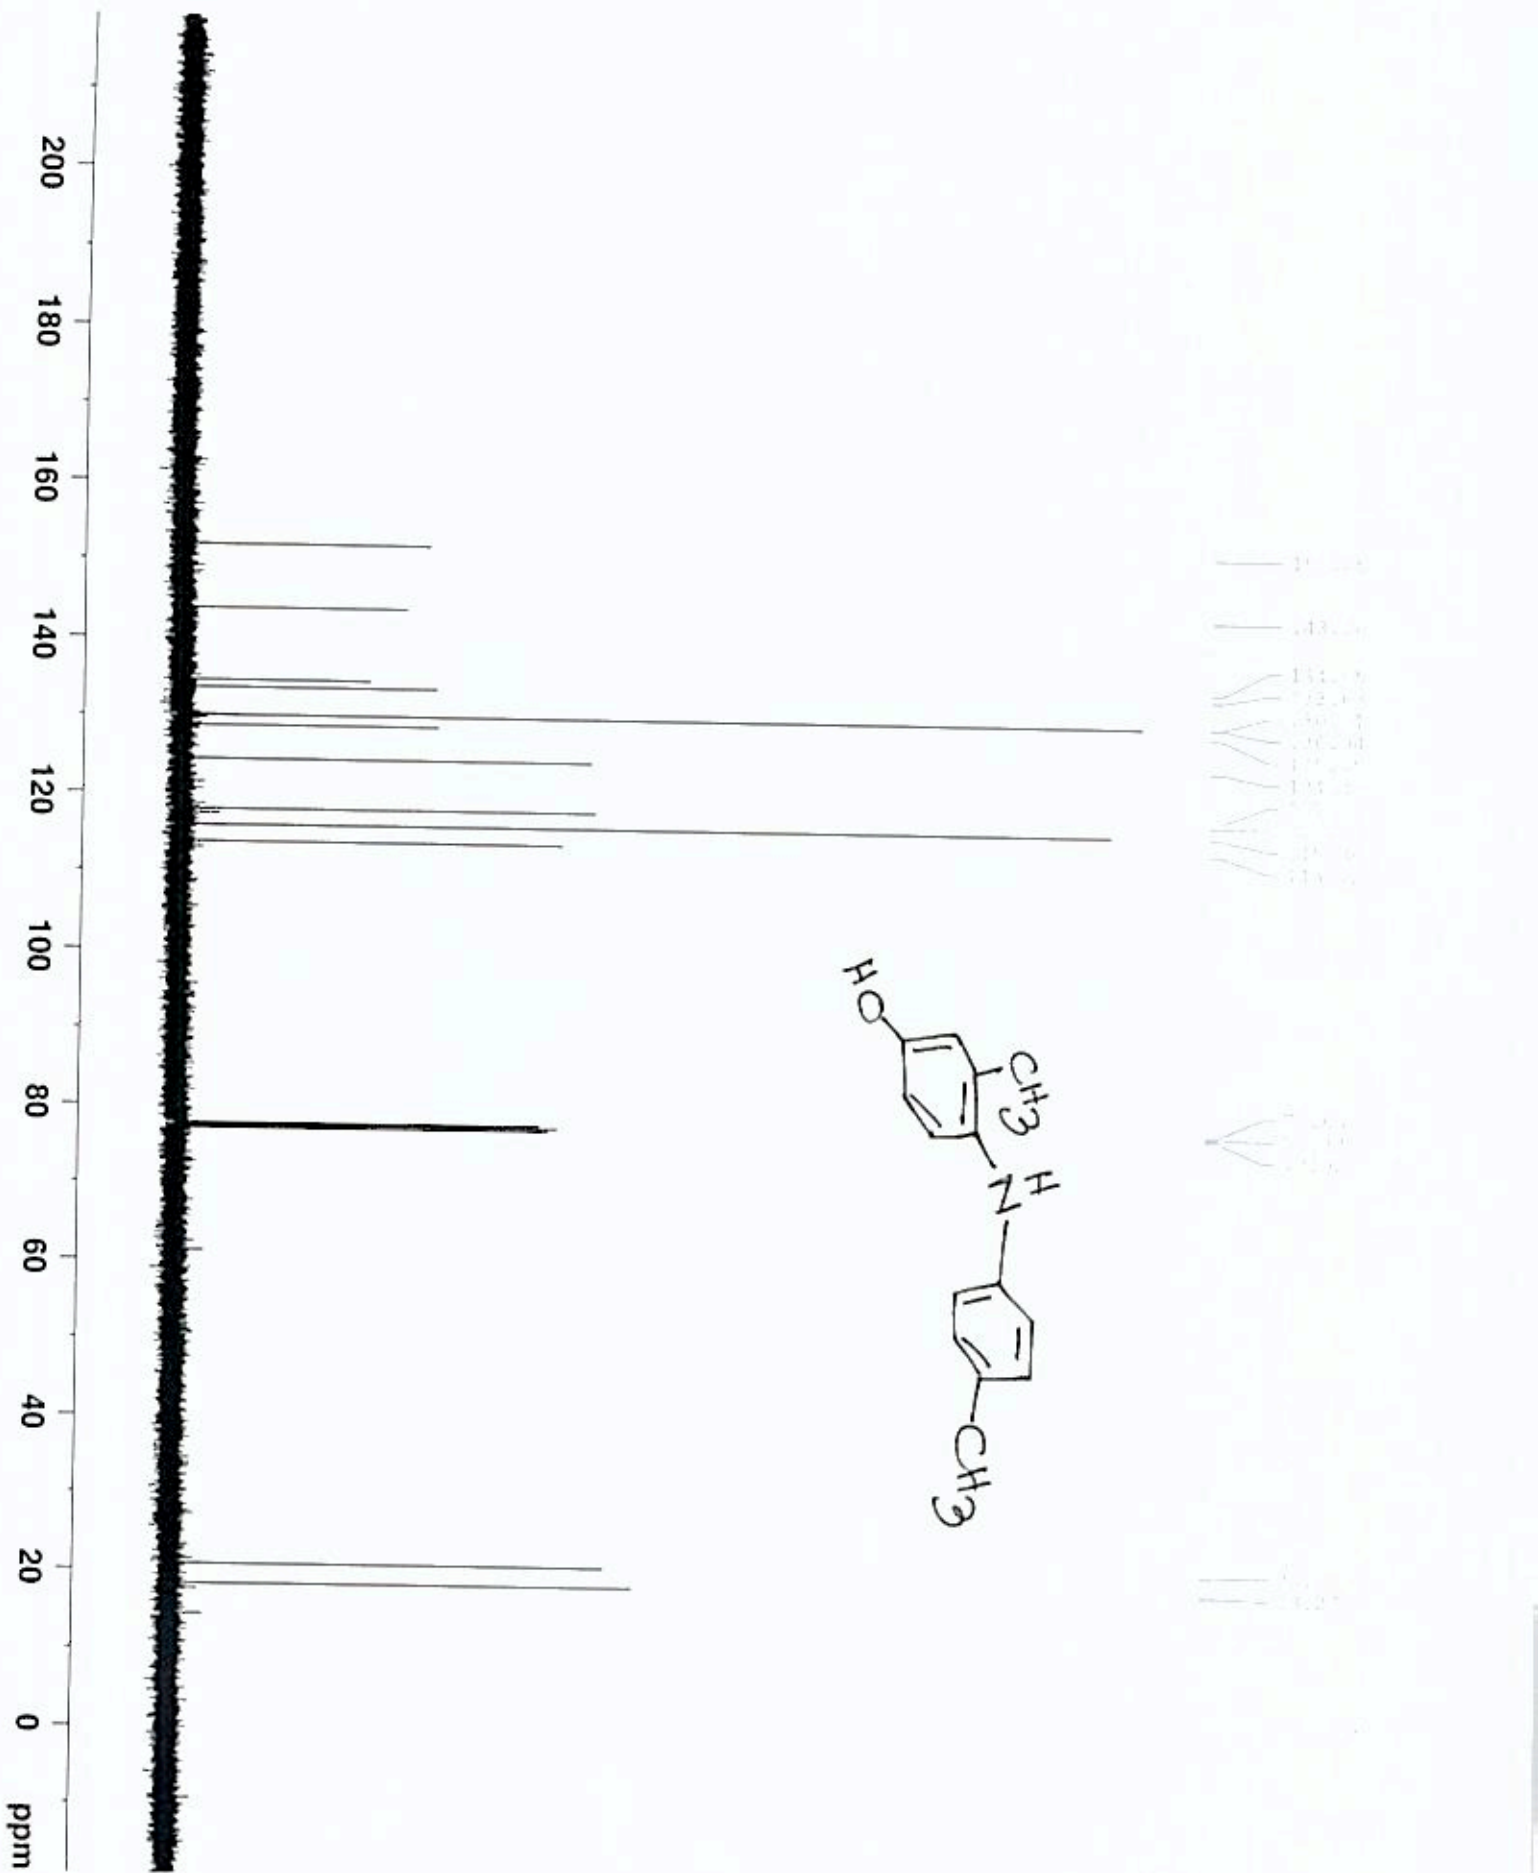

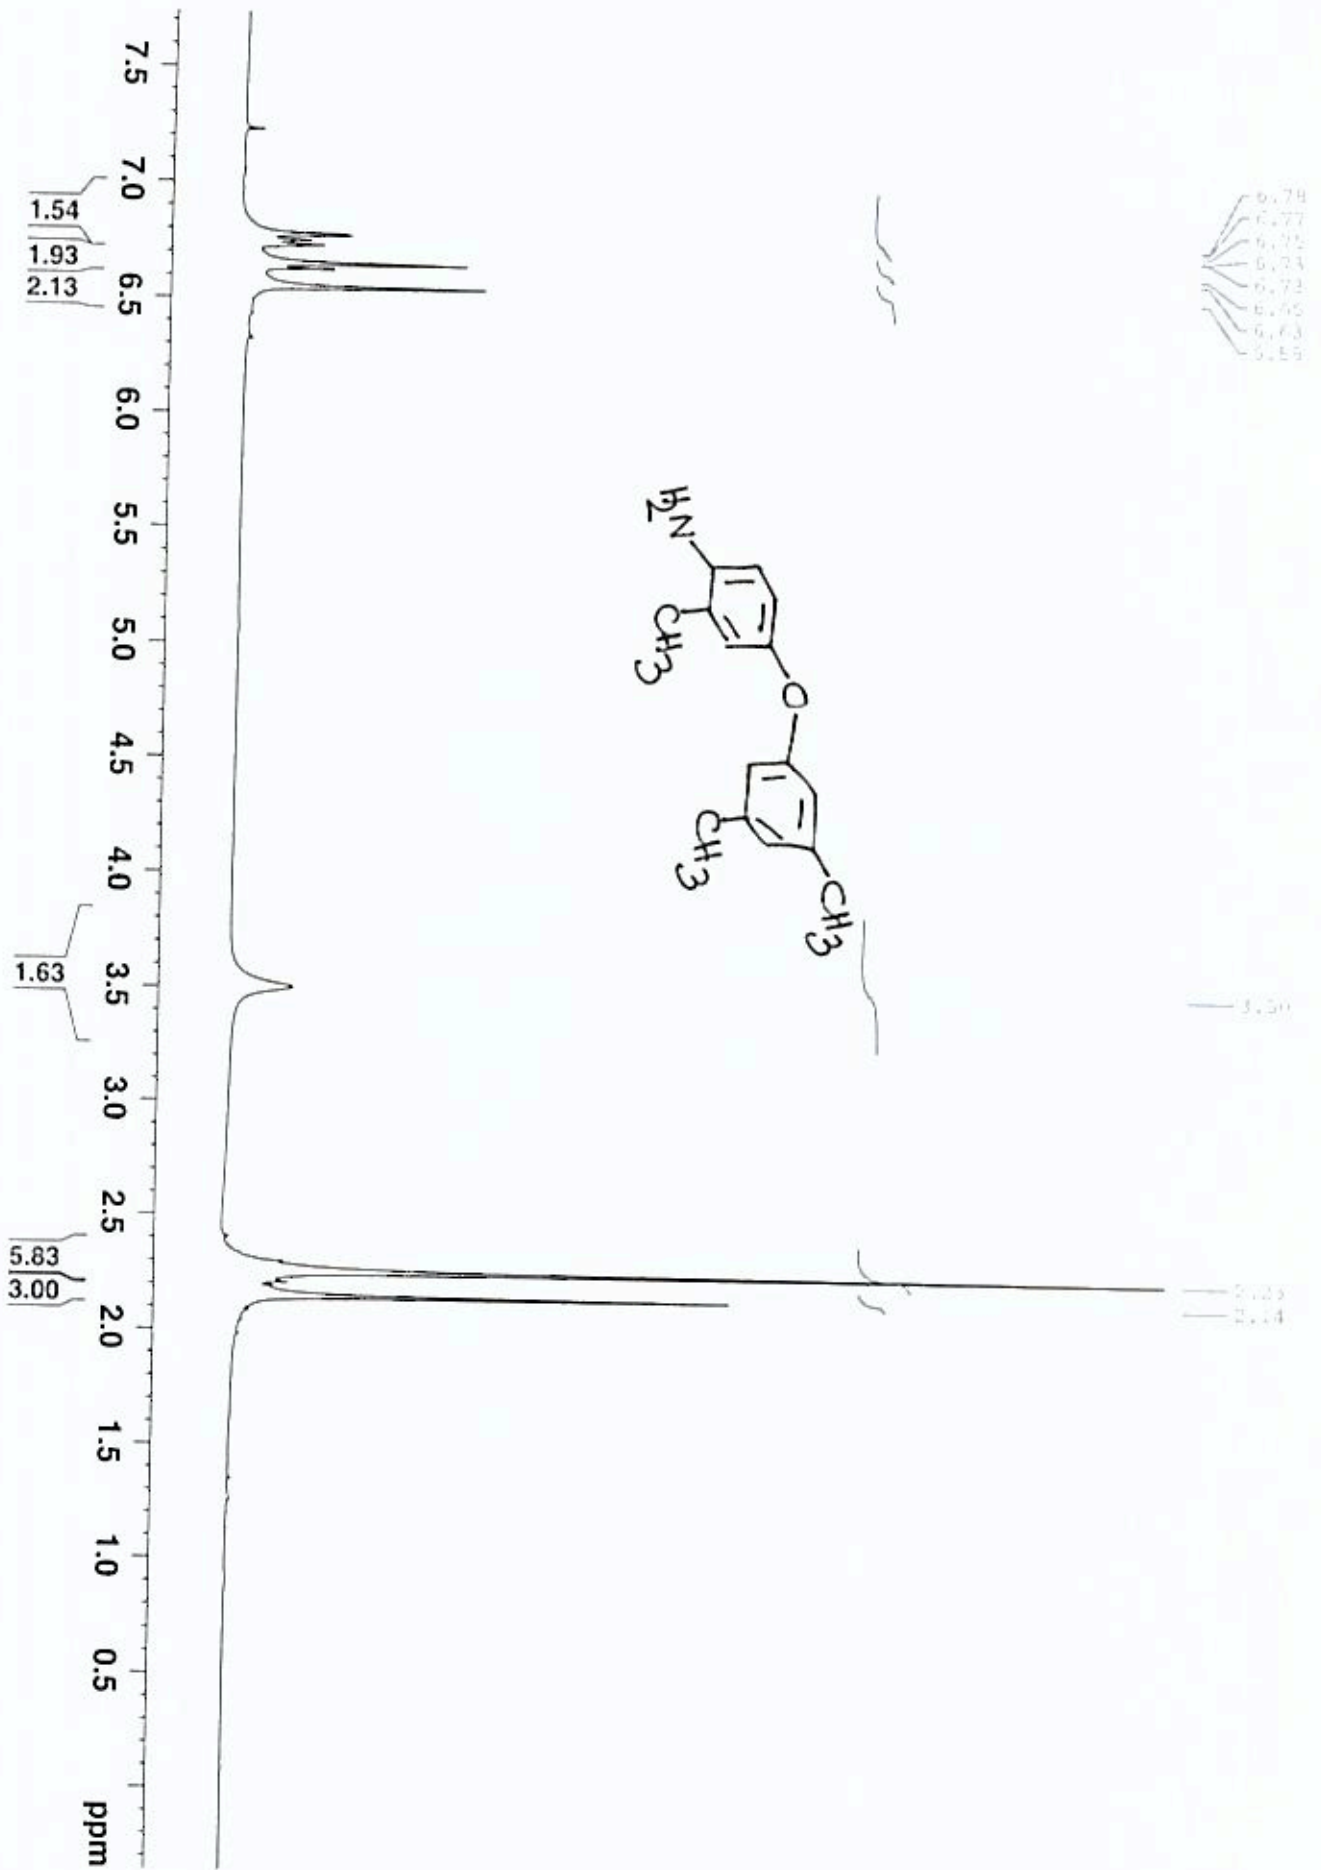

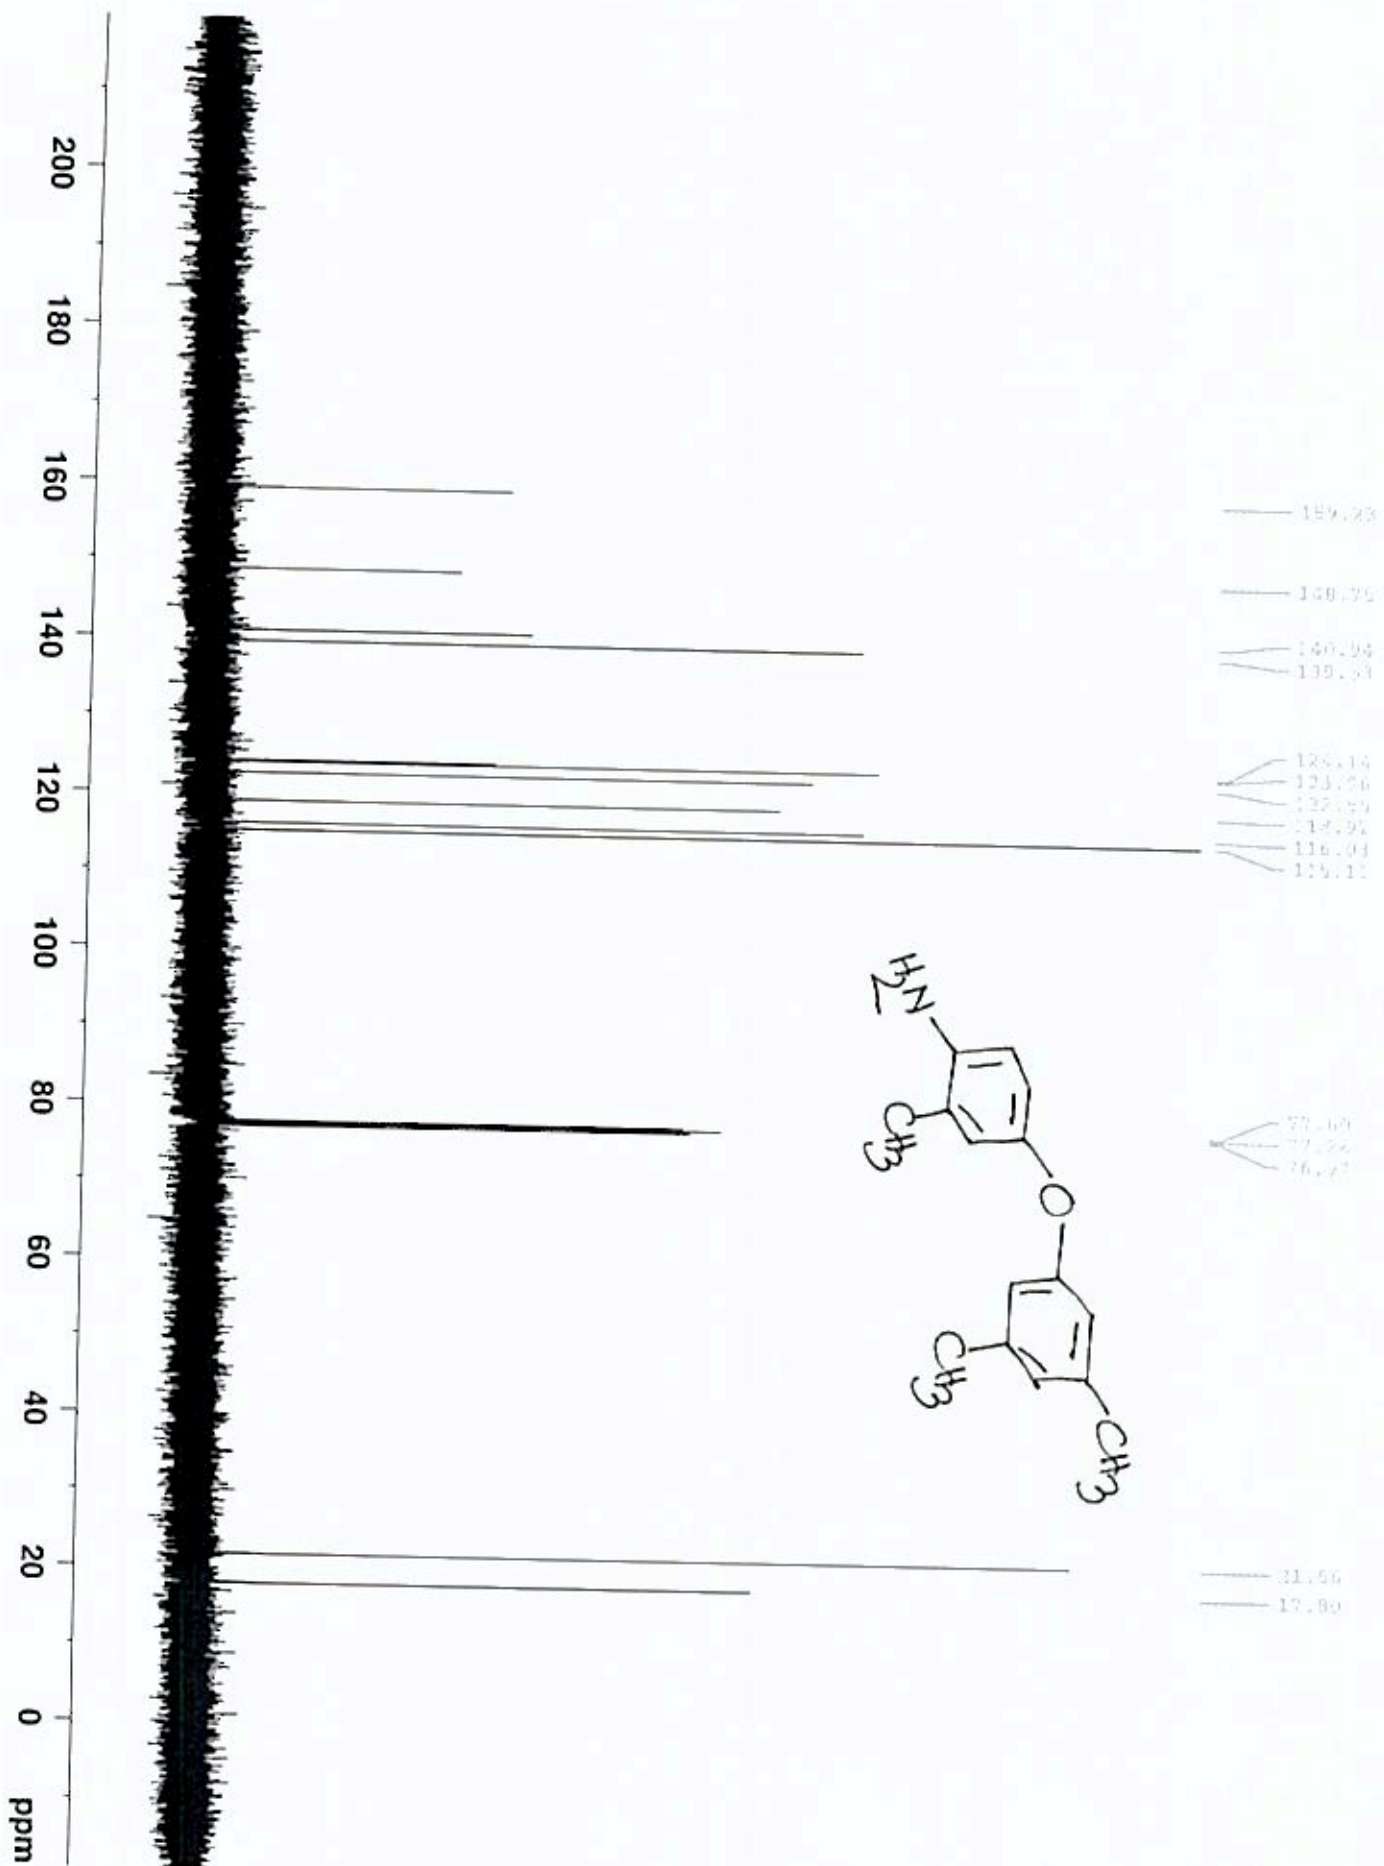

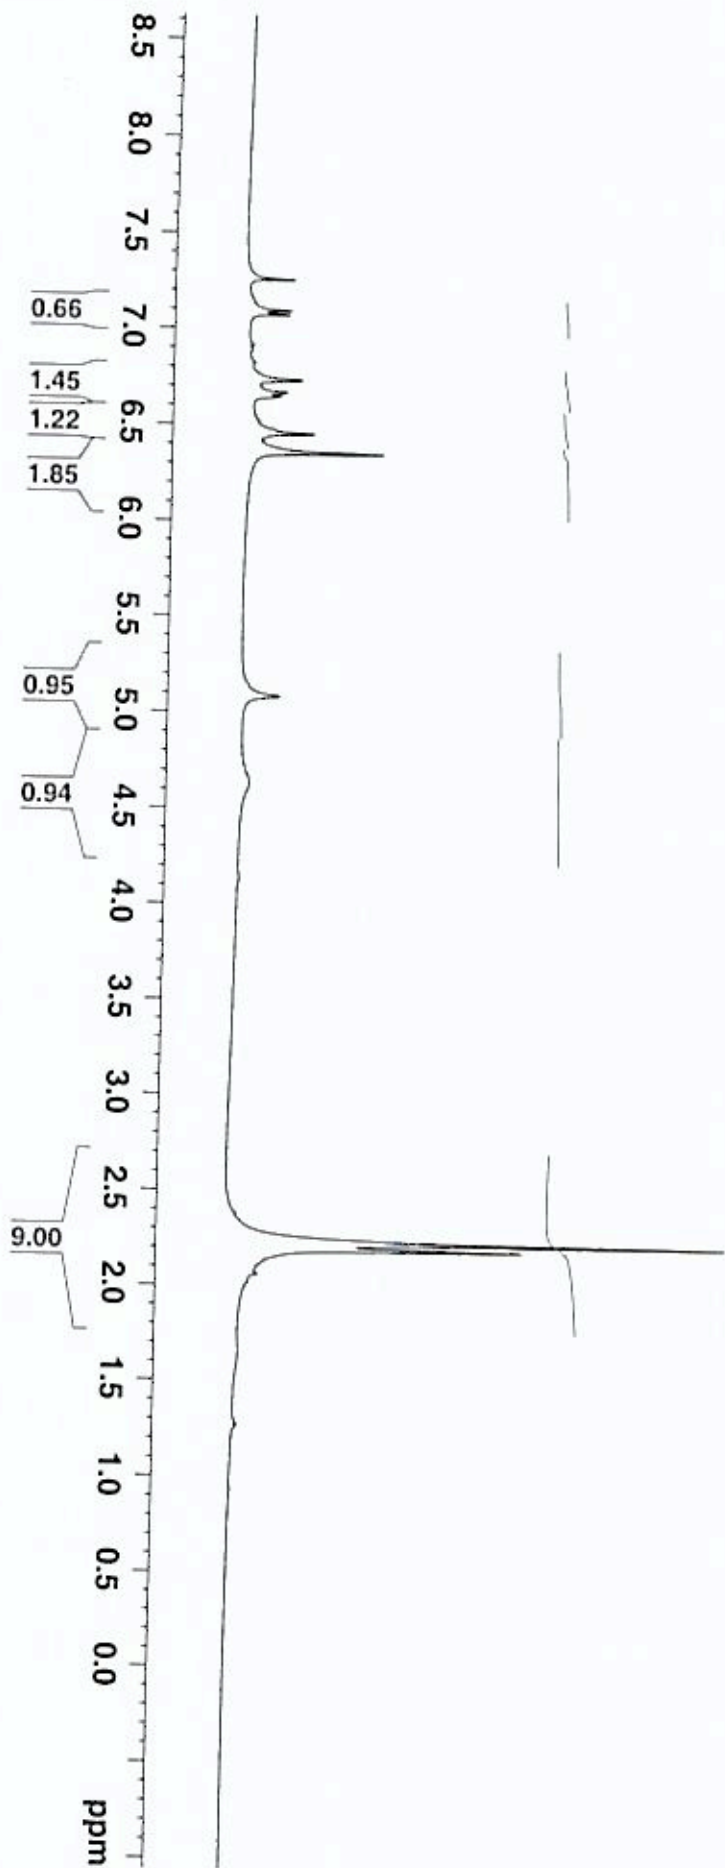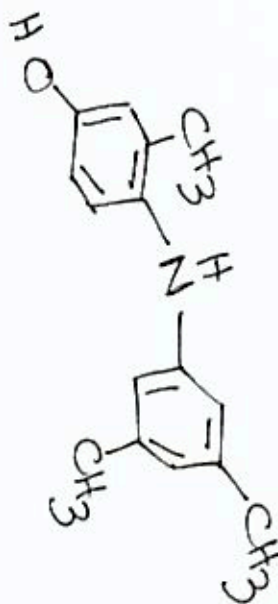

| Chemical Shift (ppm) | Integration |
|----------------------|-------------|
| 7.26                 | 0.66        |
| 7.17                 | 1.45        |
| 7.07                 | 1.22        |
| 6.23                 | 1.85        |
| 5.87                 | 0.94        |
| 6.03                 | 0.95        |
| 6.45                 |             |
| 6.36                 |             |
| 2.20                 | 9.00        |

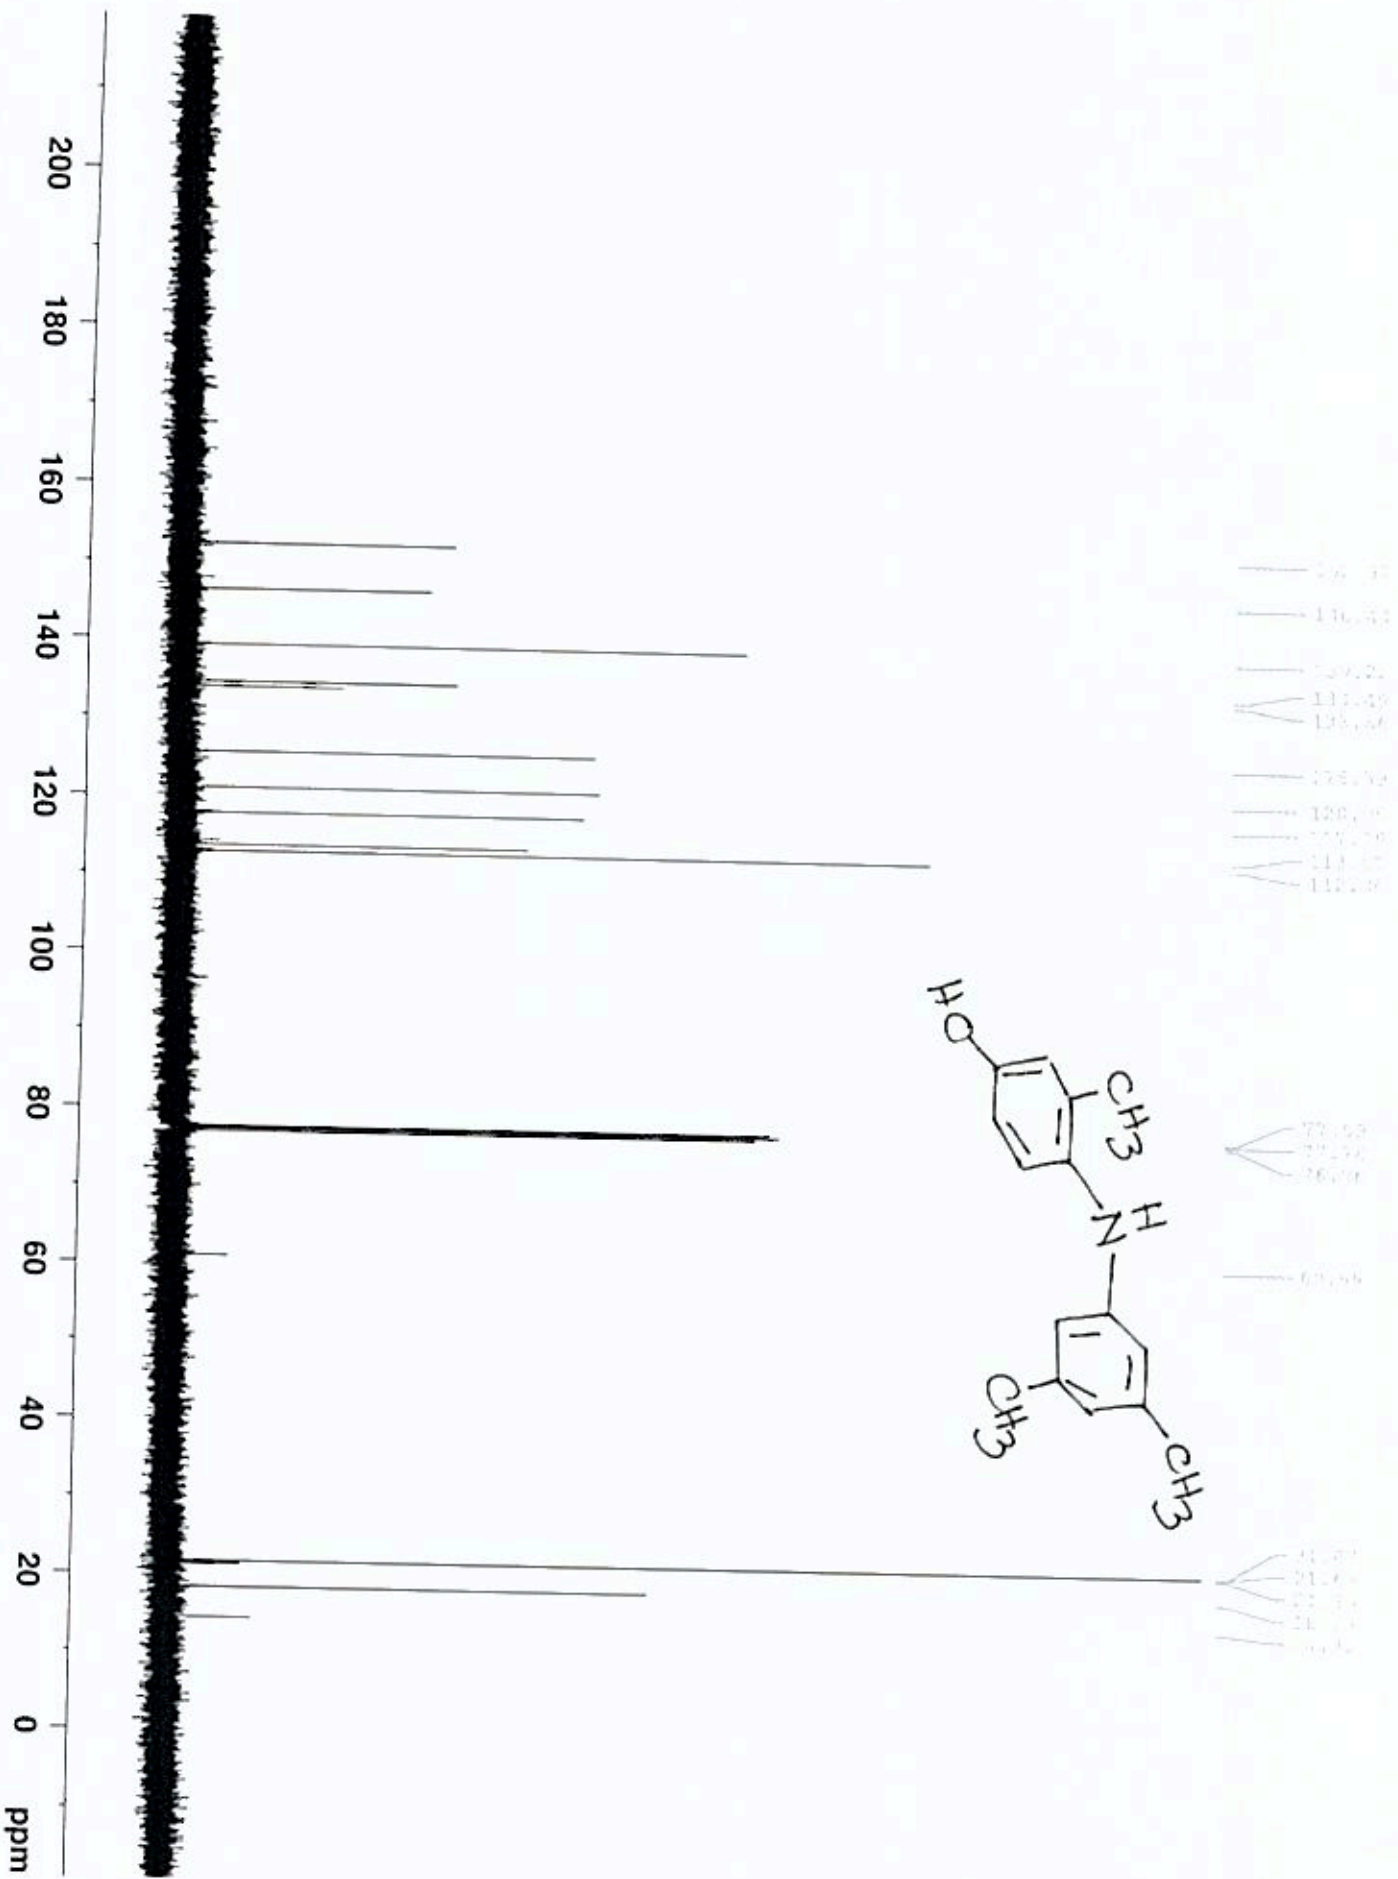

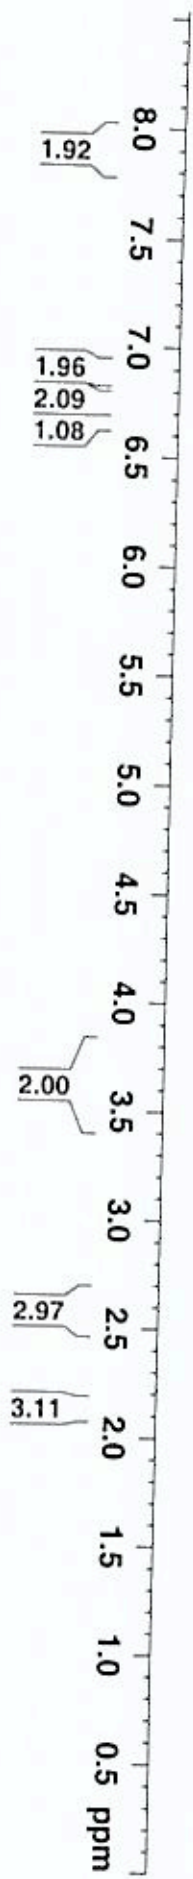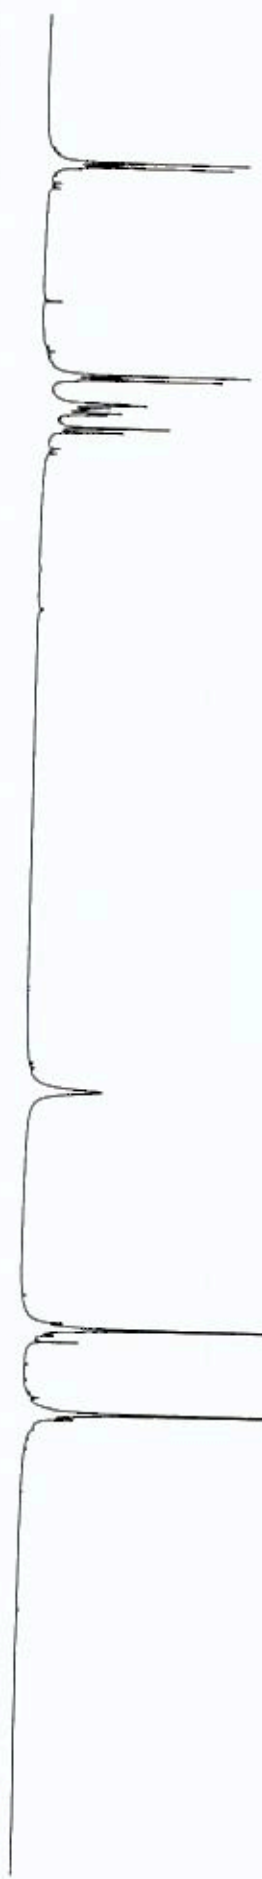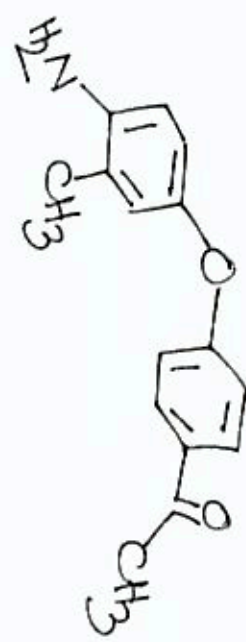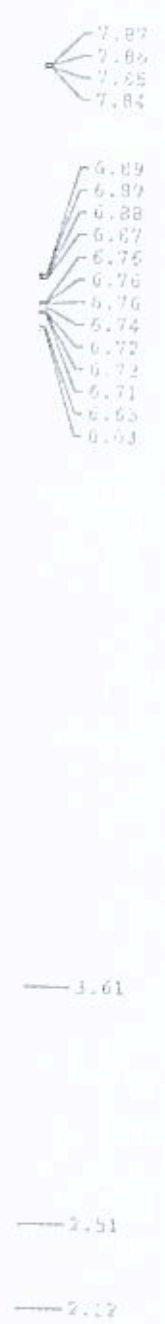

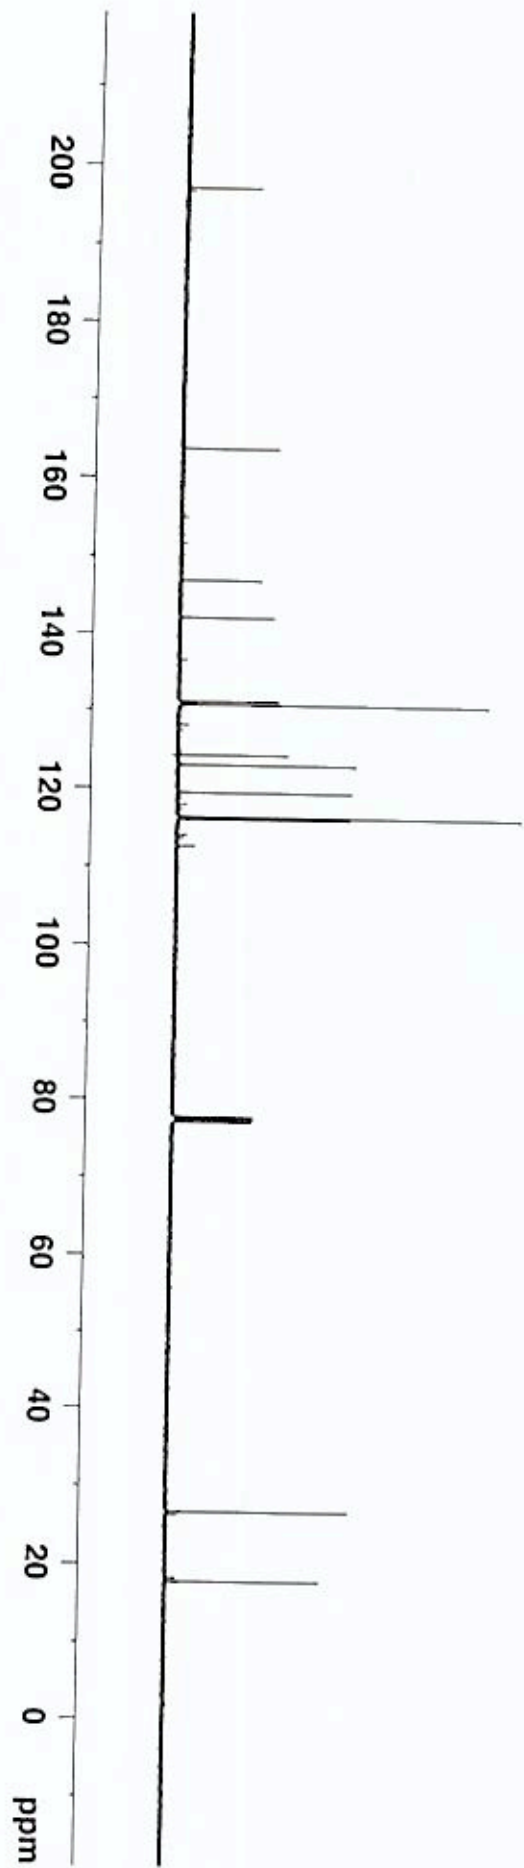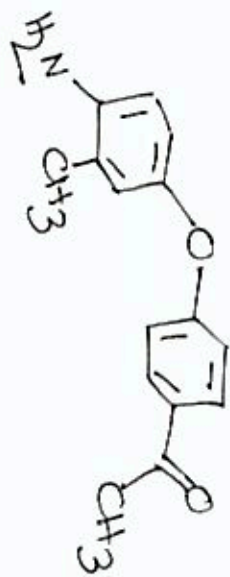

- 197.07
- 163.07
- 148.91
- 142.09
- 130.17
- 128.75
- 124.28
- 122.83
- 119.45
- 116.19
- 116.06
- 77.26
- 75.34
- 73.10
- 28.11
- 17.77



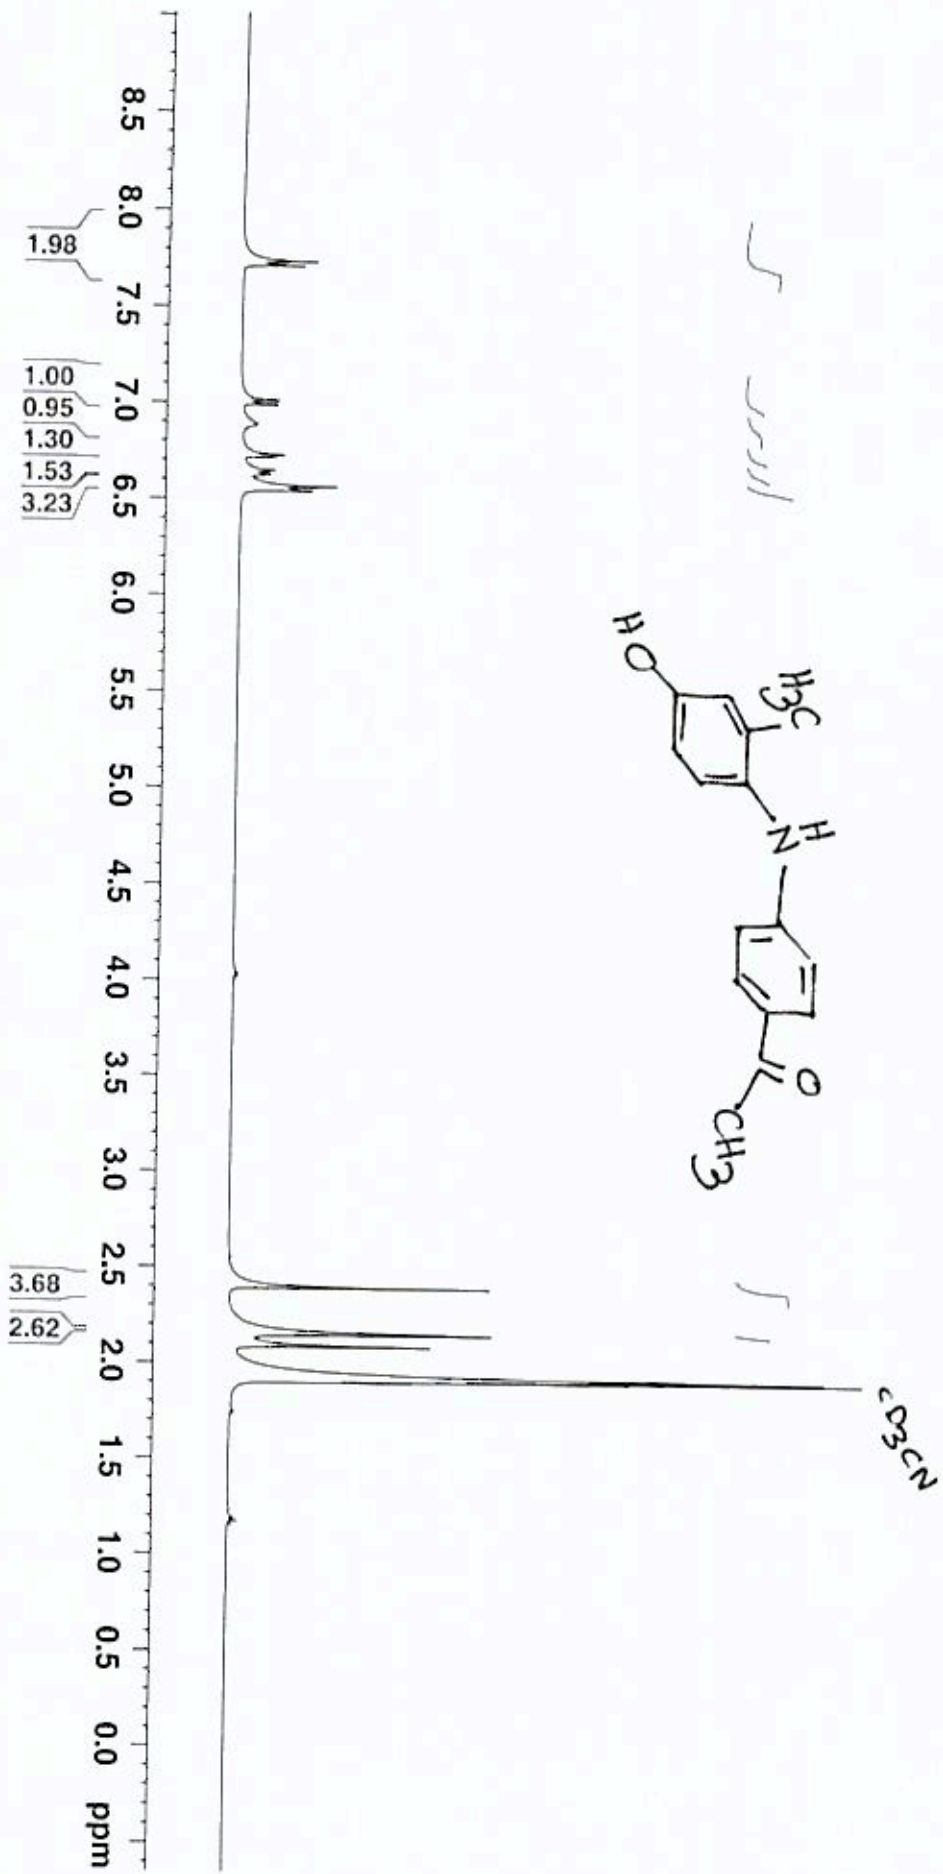



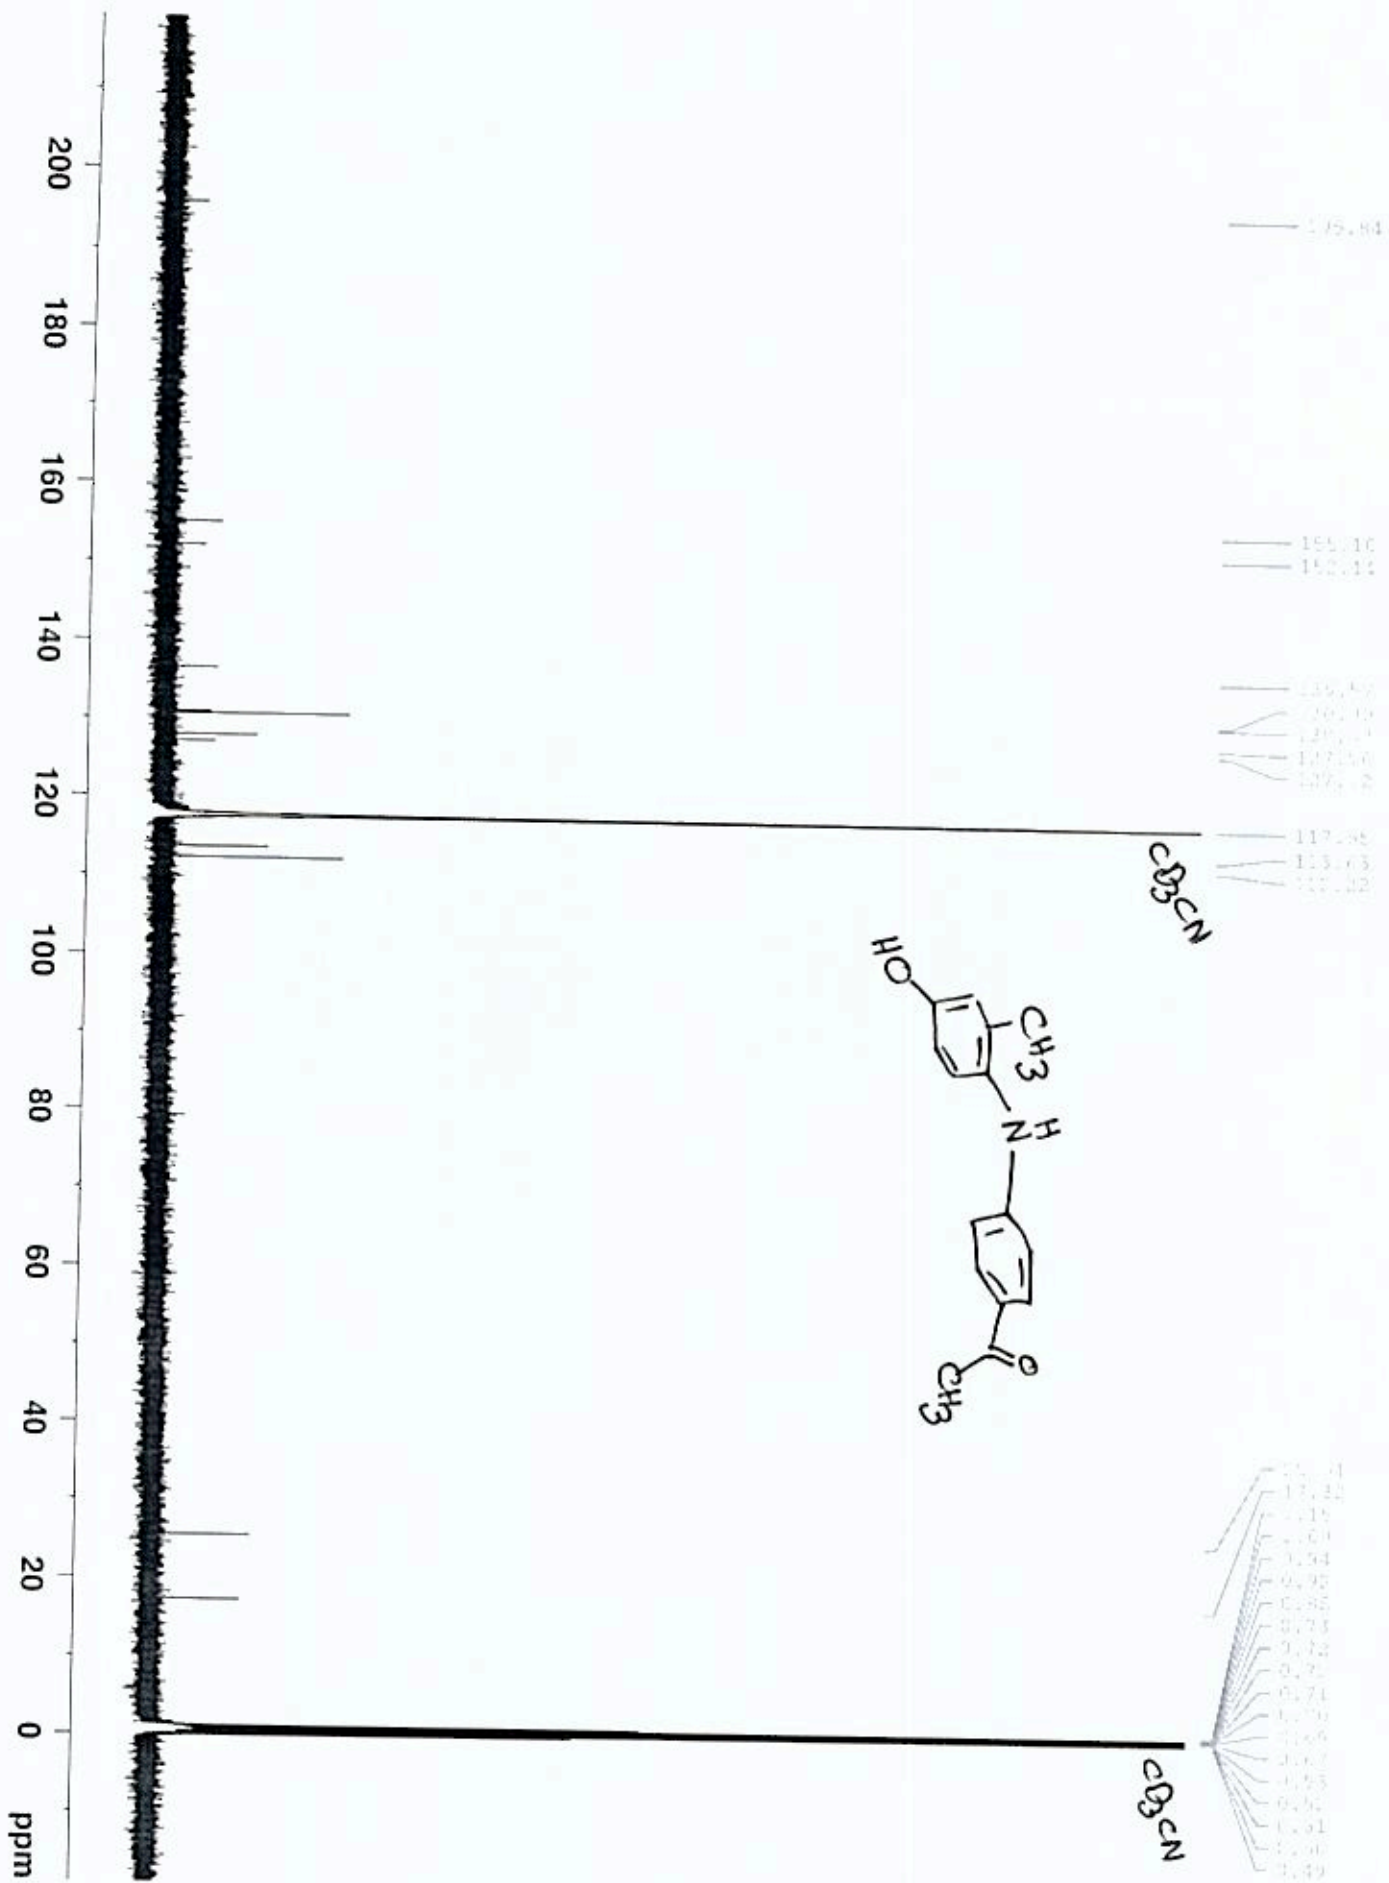

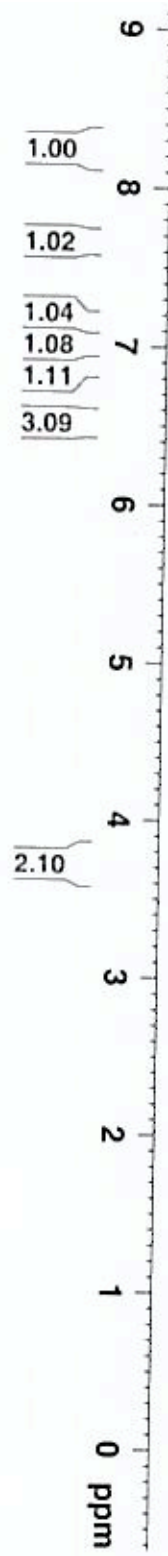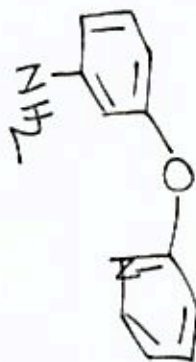

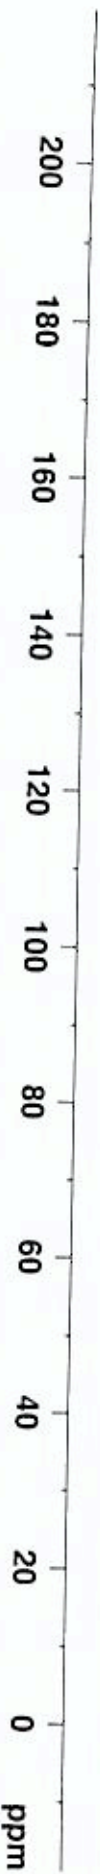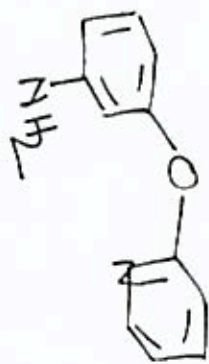

| Chemical Shift (ppm) | Assignment        |
|----------------------|-------------------|
| 148.1                | Aromatic C-O      |
| 147.2                | Aromatic C-O      |
| 146.3                | Aromatic C-O      |
| 145.4                | Aromatic C-O      |
| 144.5                | Aromatic C-O      |
| 143.6                | Aromatic C-O      |
| 142.7                | Aromatic C-O      |
| 141.8                | Aromatic C-O      |
| 140.9                | Aromatic C-O      |
| 140.0                | Aromatic C-O      |
| 139.1                | Aromatic C-O      |
| 138.2                | Aromatic C-O      |
| 137.3                | Aromatic C-O      |
| 136.4                | Aromatic C-O      |
| 135.5                | Aromatic C-O      |
| 134.6                | Aromatic C-O      |
| 133.7                | Aromatic C-O      |
| 132.8                | Aromatic C-O      |
| 131.9                | Aromatic C-O      |
| 131.0                | Aromatic C-O      |
| 130.1                | Aromatic C-O      |
| 129.2                | Aromatic C-O      |
| 128.3                | Aromatic C-O      |
| 127.4                | Aromatic C-O      |
| 126.5                | Aromatic C-O      |
| 125.6                | Aromatic C-O      |
| 124.7                | Aromatic C-O      |
| 123.8                | Aromatic C-O      |
| 122.9                | Aromatic C-O      |
| 122.0                | Aromatic C-O      |
| 121.1                | Aromatic C-O      |
| 120.2                | Aromatic C-O      |
| 119.3                | Aromatic C-O      |
| 118.4                | Aromatic C-O      |
| 117.5                | Aromatic C-O      |
| 116.6                | Aromatic C-O      |
| 115.7                | Aromatic C-O      |
| 114.8                | Aromatic C-O      |
| 113.9                | Aromatic C-O      |
| 113.0                | Aromatic C-O      |
| 112.1                | Aromatic C-O      |
| 111.2                | Aromatic C-O      |
| 110.3                | Aromatic C-O      |
| 109.4                | Aromatic C-O      |
| 108.5                | Aromatic C-O      |
| 107.6                | Aromatic C-O      |
| 106.7                | Aromatic C-O      |
| 105.8                | Aromatic C-O      |
| 104.9                | Aromatic C-O      |
| 104.0                | Aromatic C-O      |
| 103.1                | Aromatic C-O      |
| 102.2                | Aromatic C-O      |
| 101.3                | Aromatic C-O      |
| 100.4                | Aromatic C-O      |
| 99.5                 | Aromatic C-O      |
| 98.6                 | Aromatic C-O      |
| 97.7                 | Aromatic C-O      |
| 96.8                 | Aromatic C-O      |
| 95.9                 | Aromatic C-O      |
| 95.0                 | Aromatic C-O      |
| 94.1                 | Aromatic C-O      |
| 93.2                 | Aromatic C-O      |
| 92.3                 | Aromatic C-O      |
| 91.4                 | Aromatic C-O      |
| 90.5                 | Aromatic C-O      |
| 89.6                 | Aromatic C-O      |
| 88.7                 | Aromatic C-O      |
| 87.8                 | Aromatic C-O      |
| 86.9                 | Aromatic C-O      |
| 86.0                 | Aromatic C-O      |
| 85.1                 | Aromatic C-O      |
| 84.2                 | Aromatic C-O      |
| 83.3                 | Aromatic C-O      |
| 82.4                 | Aromatic C-O      |
| 81.5                 | Aromatic C-O      |
| 80.6                 | Aromatic C-O      |
| 79.7                 | Aromatic C-O      |
| 78.8                 | Aromatic C-O      |
| 77.9                 | Aromatic C-O      |
| 77.0                 | CDCl <sub>3</sub> |
| 76.1                 | Aromatic C-O      |
| 75.2                 | Aromatic C-O      |
| 74.3                 | Aromatic C-O      |
| 73.4                 | Aromatic C-O      |
| 72.5                 | Aromatic C-O      |
| 71.6                 | Aromatic C-O      |
| 70.7                 | Aromatic C-O      |
| 69.8                 | Aromatic C-O      |
| 68.9                 | Aromatic C-O      |
| 68.0                 | Aromatic C-O      |
| 67.1                 | Aromatic C-O      |
| 66.2                 | Aromatic C-O      |
| 65.3                 | Aromatic C-O      |
| 64.4                 | Aromatic C-O      |
| 63.5                 | Aromatic C-O      |
| 62.6                 | Aromatic C-O      |
| 61.7                 | Aromatic C-O      |
| 60.8                 | Aromatic C-O      |
| 59.9                 | Aromatic C-O      |
| 59.0                 | Aromatic C-O      |
| 58.1                 | Aromatic C-O      |
| 57.2                 | Aromatic C-O      |
| 56.3                 | Aromatic C-O      |
| 55.4                 | Aromatic C-O      |
| 54.5                 | Aromatic C-O      |
| 53.6                 | Aromatic C-O      |
| 52.7                 | Aromatic C-O      |
| 51.8                 | Aromatic C-O      |
| 50.9                 | Aromatic C-O      |
| 50.0                 | Aromatic C-O      |
| 49.1                 | Aromatic C-O      |
| 48.2                 | Aromatic C-O      |
| 47.3                 | Aromatic C-O      |
| 46.4                 | Aromatic C-O      |
| 45.5                 | Aromatic C-O      |
| 44.6                 | Aromatic C-O      |
| 43.7                 | Aromatic C-O      |
| 42.8                 | Aromatic C-O      |
| 41.9                 | Aromatic C-O      |
| 41.0                 | Aromatic C-O      |
| 40.1                 | Aromatic C-O      |
| 39.2                 | Aromatic C-O      |
| 38.3                 | Aromatic C-O      |
| 37.4                 | Aromatic C-O      |
| 36.5                 | Aromatic C-O      |
| 35.6                 | Aromatic C-O      |
| 34.7                 | Aromatic C-O      |
| 33.8                 | Aromatic C-O      |
| 32.9                 | Aromatic C-O      |
| 32.0                 | Aromatic C-O      |
| 31.1                 | Aromatic C-O      |
| 30.2                 | Aromatic C-O      |
| 29.3                 | Aromatic C-O      |
| 28.4                 | Aromatic C-O      |
| 27.5                 | Aromatic C-O      |
| 26.6                 | Aromatic C-O      |
| 25.7                 | Aromatic C-O      |
| 24.8                 | Aromatic C-O      |
| 23.9                 | Aromatic C-O      |
| 23.0                 | Aromatic C-O      |
| 22.1                 | Aromatic C-O      |
| 21.2                 | Aromatic C-O      |
| 20.3                 | Aromatic C-O      |
| 19.4                 | Aromatic C-O      |
| 18.5                 | Aromatic C-O      |
| 17.6                 | Aromatic C-O      |
| 16.7                 | Aromatic C-O      |
| 15.8                 | Aromatic C-O      |
| 14.9                 | Aromatic C-O      |
| 14.0                 | Aromatic C-O      |
| 13.1                 | Aromatic C-O      |
| 12.2                 | Aromatic C-O      |
| 11.3                 | Aromatic C-O      |
| 10.4                 | Aromatic C-O      |
| 9.5                  | Aromatic C-O      |
| 8.6                  | Aromatic C-O      |
| 7.7                  | Aromatic C-O      |
| 6.8                  | Aromatic C-O      |
| 5.9                  | Aromatic C-O      |
| 5.0                  | Aromatic C-O      |
| 4.1                  | Aromatic C-O      |
| 3.2                  | Aromatic C-O      |
| 2.3                  | Aromatic C-O      |
| 1.4                  | Aromatic C-O      |
| 0.5                  | Aromatic C-O      |



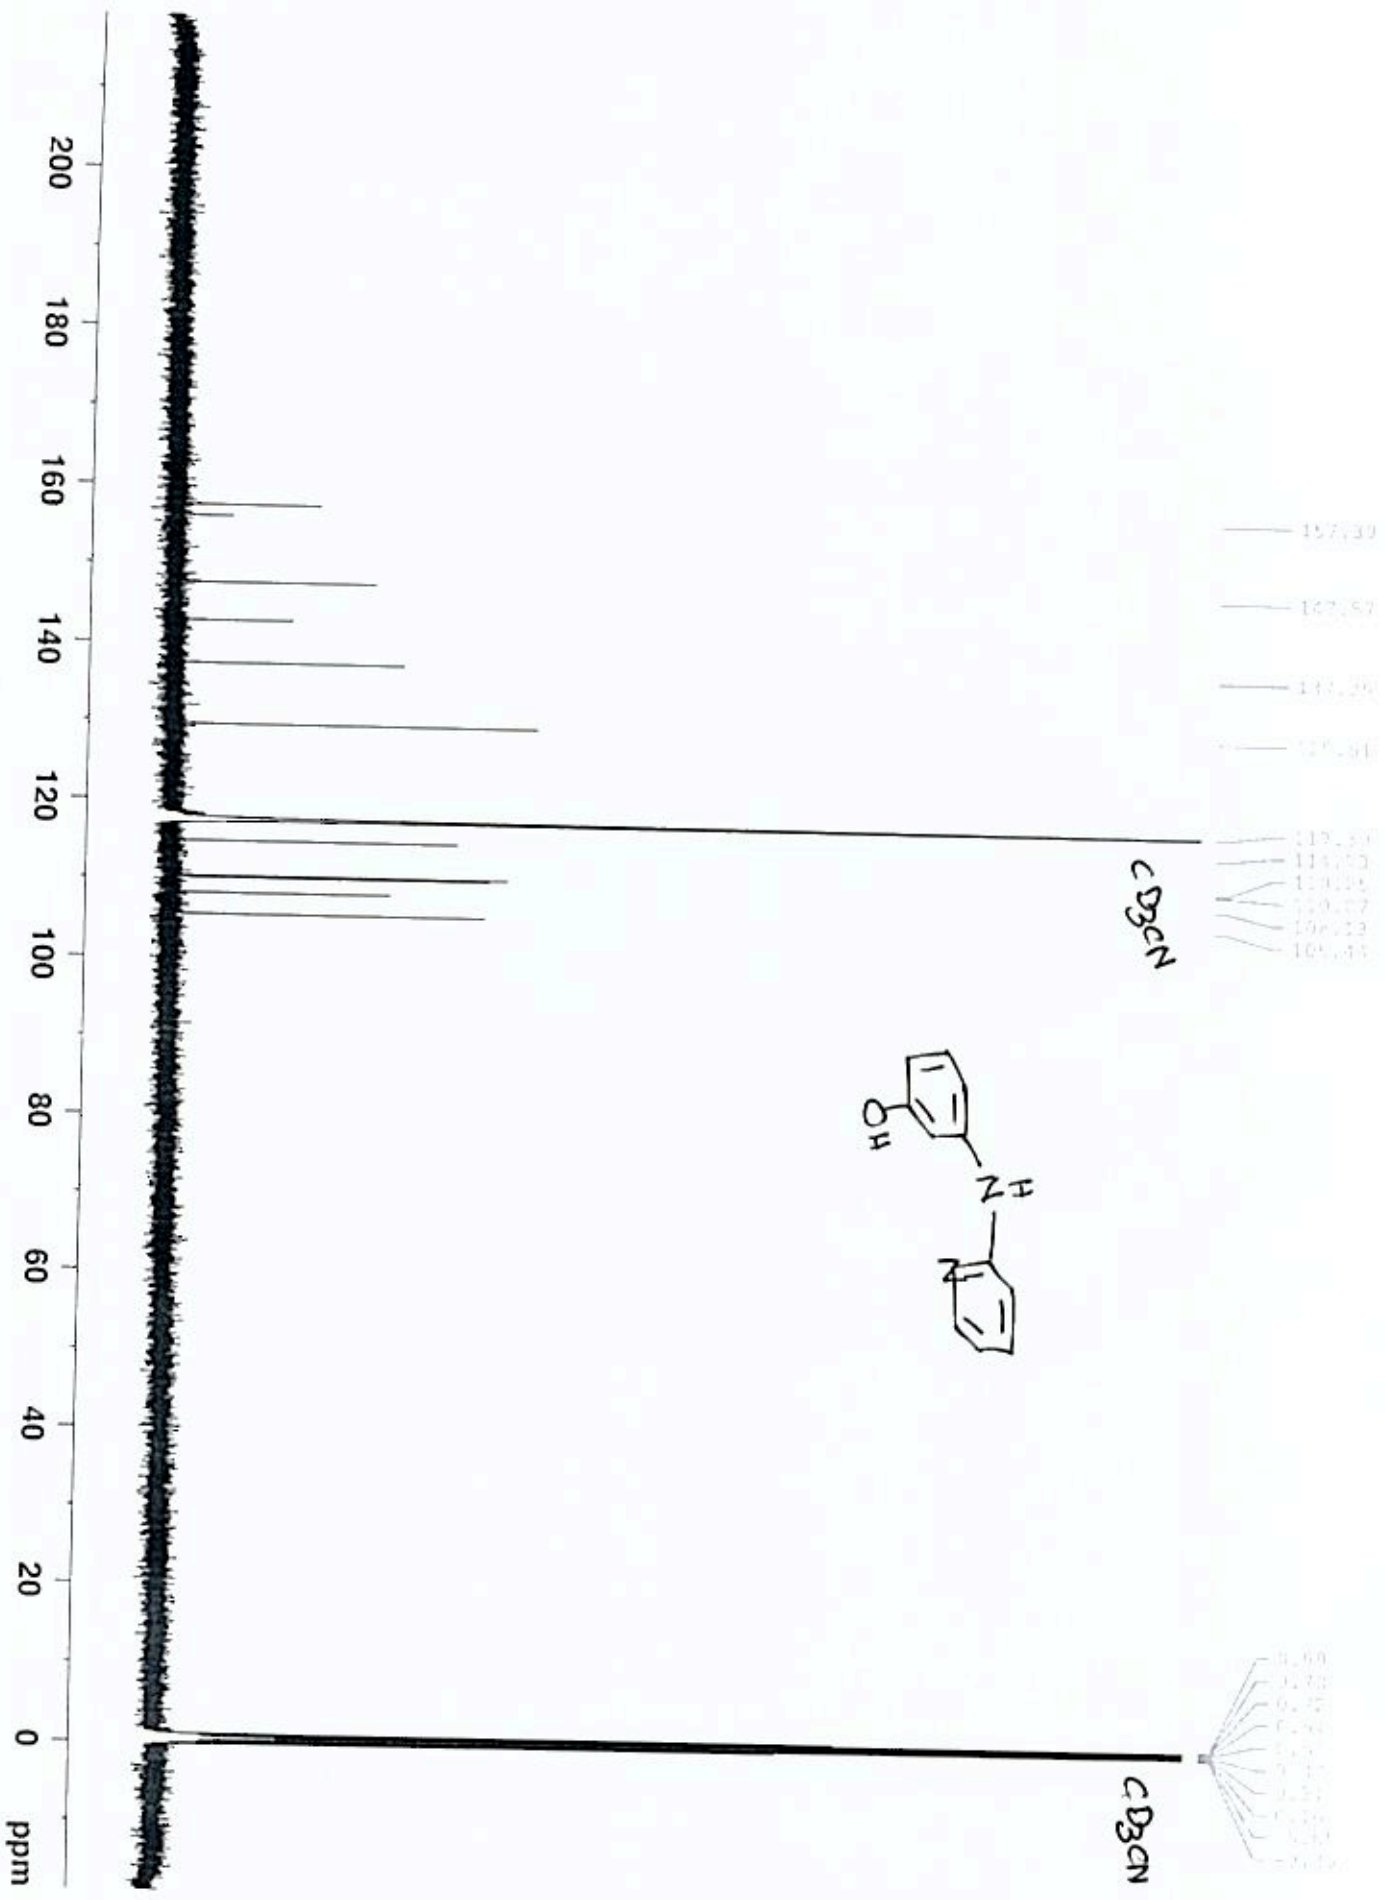

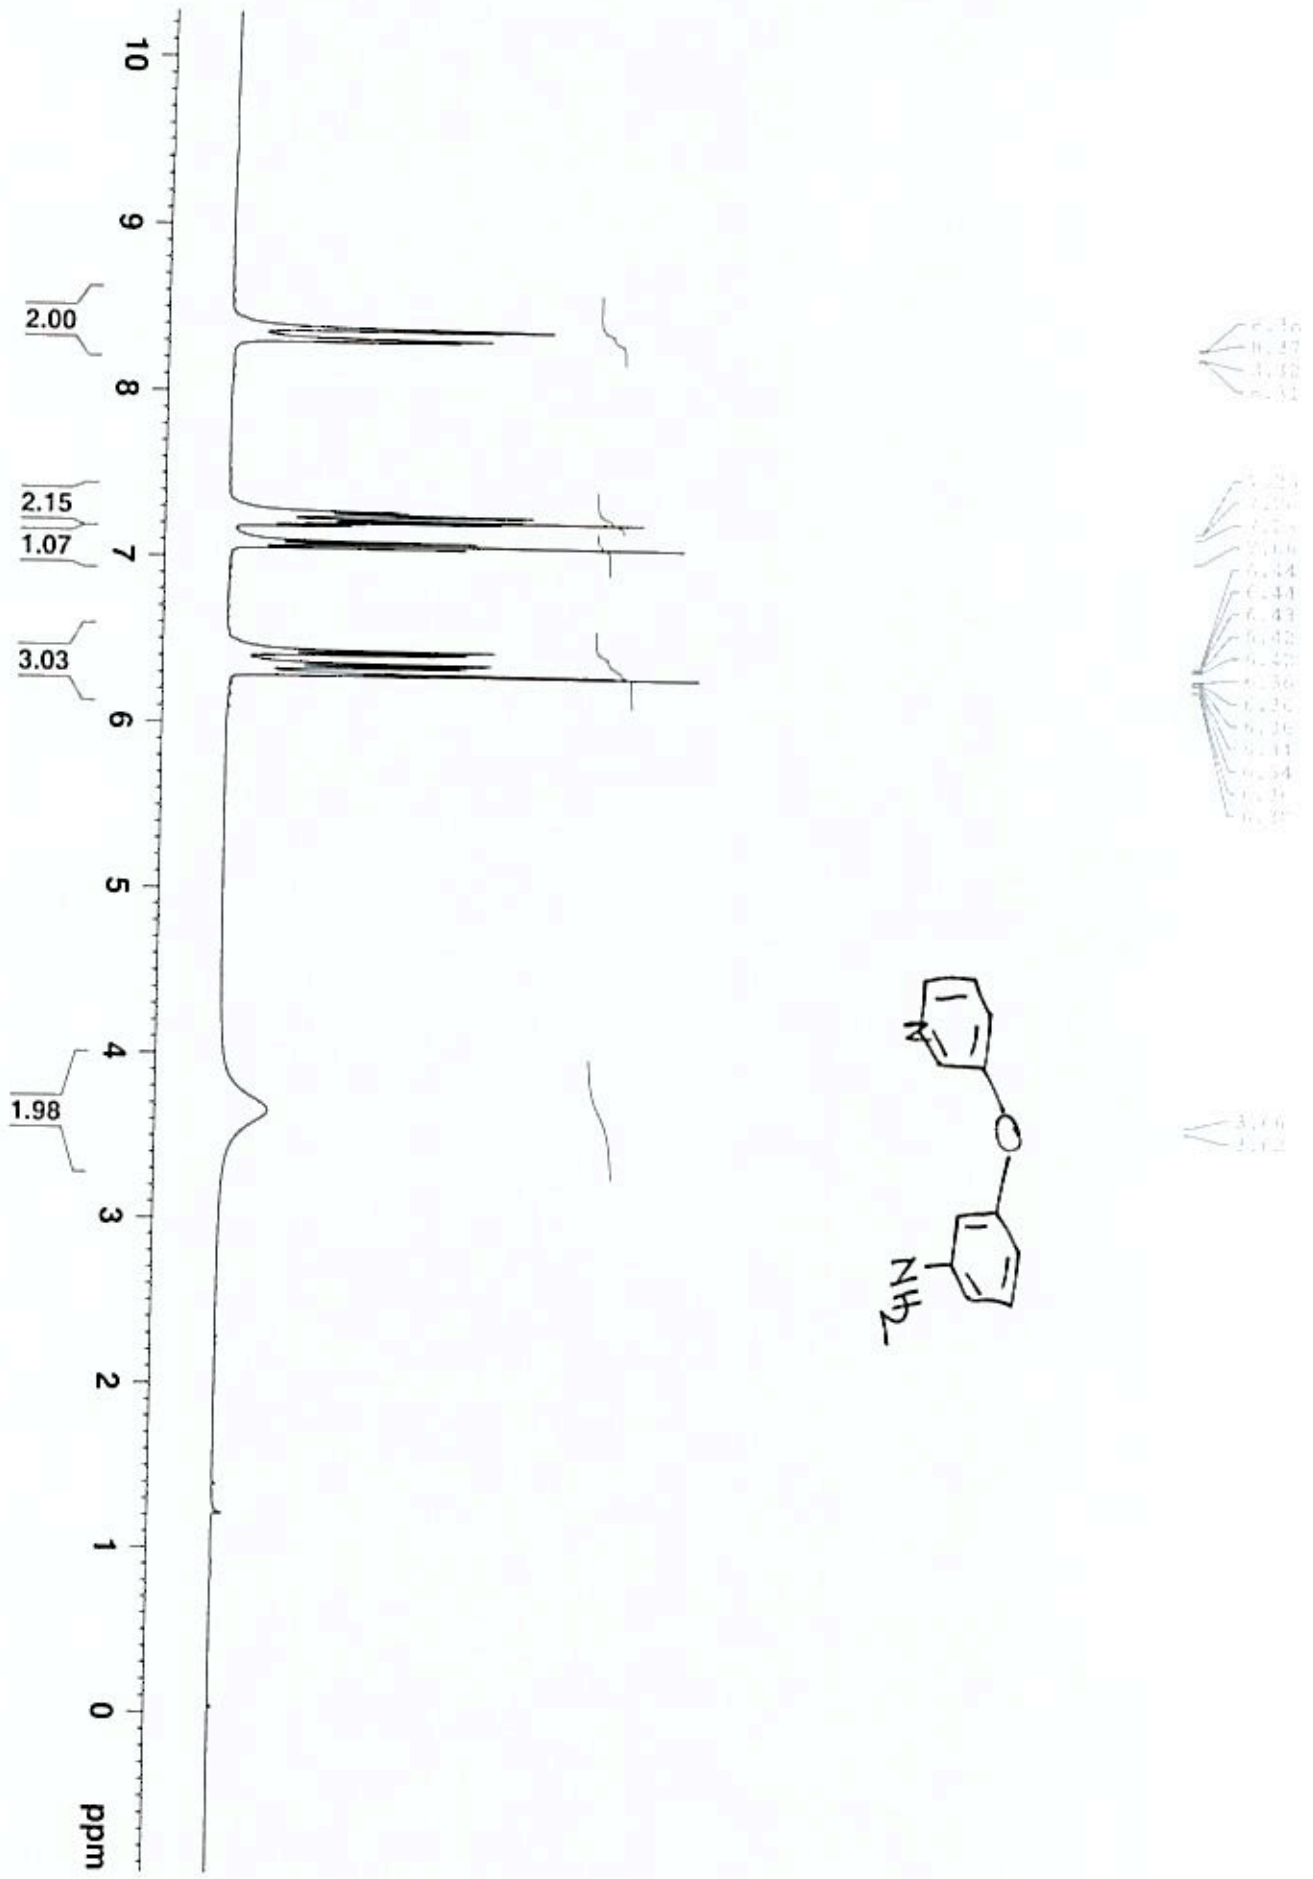

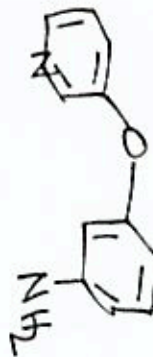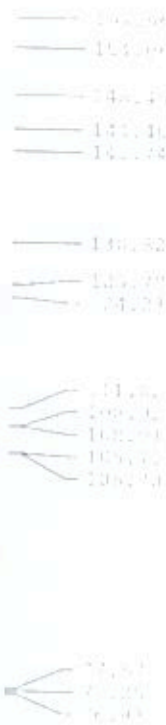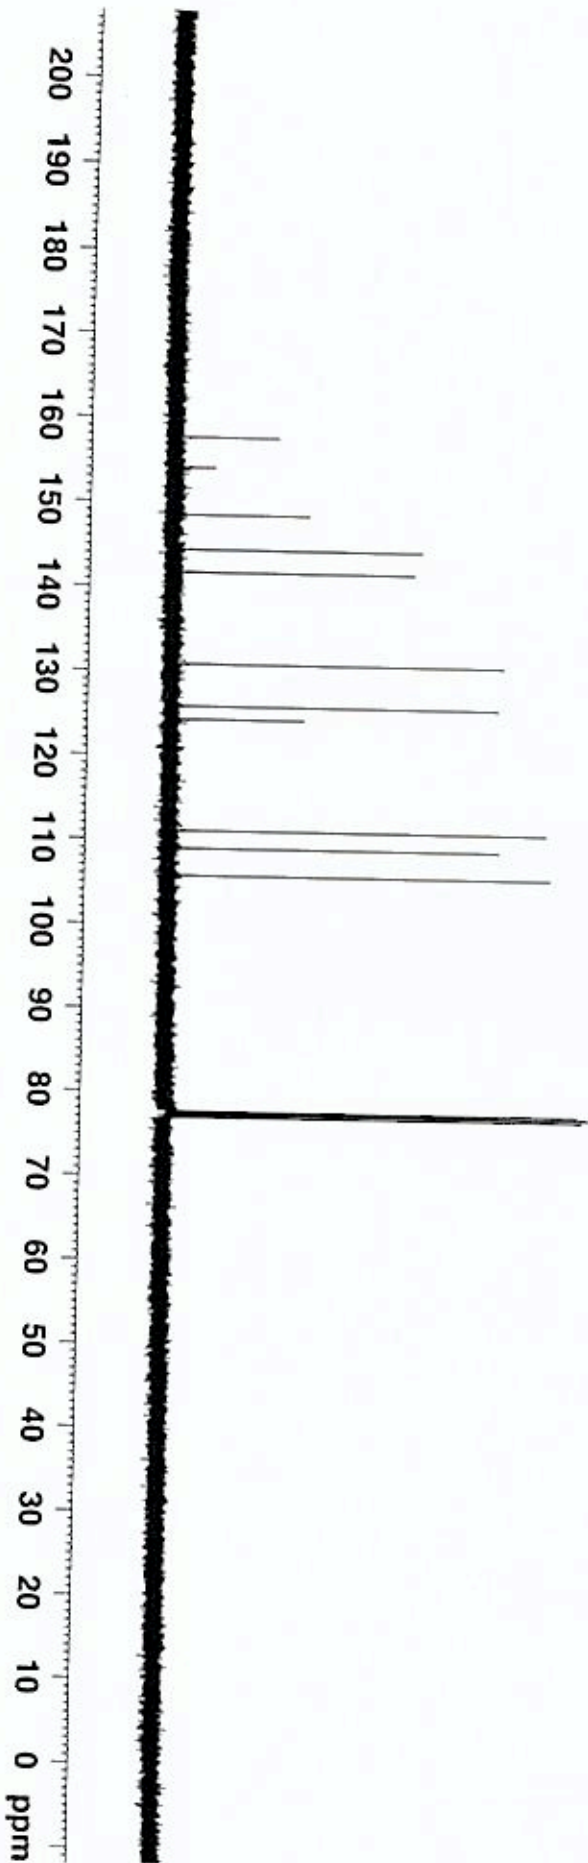



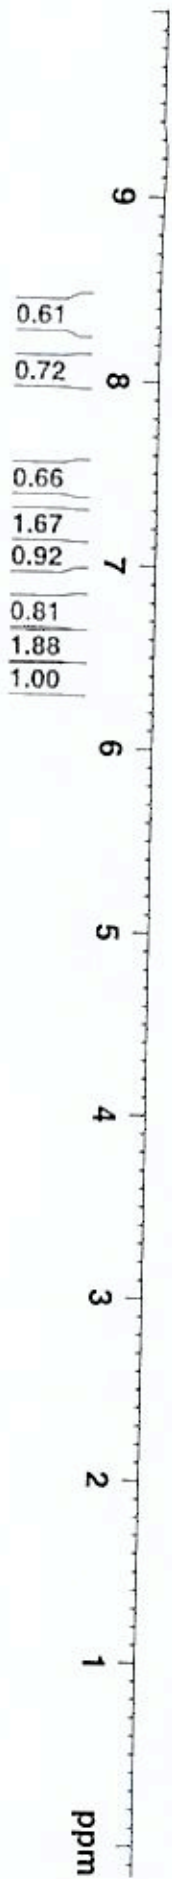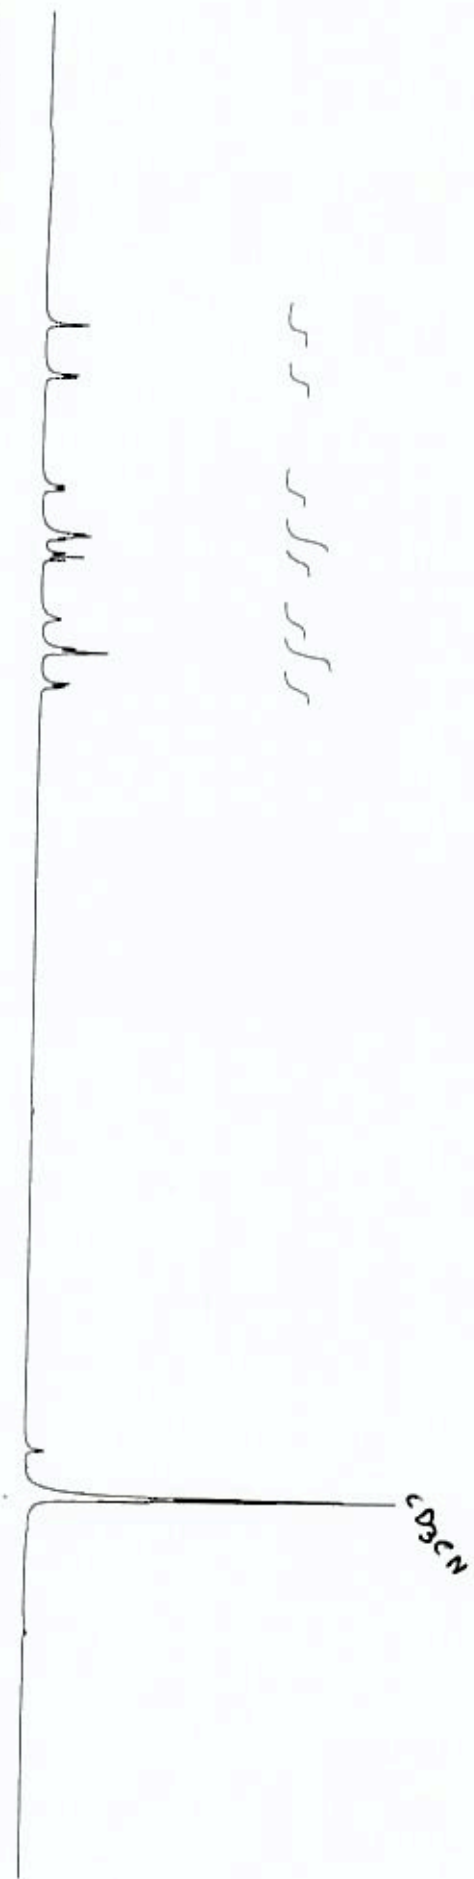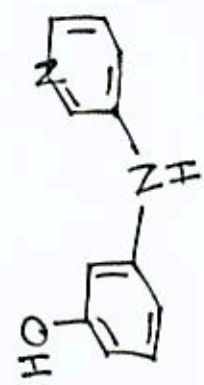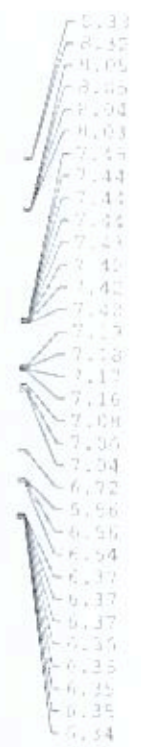



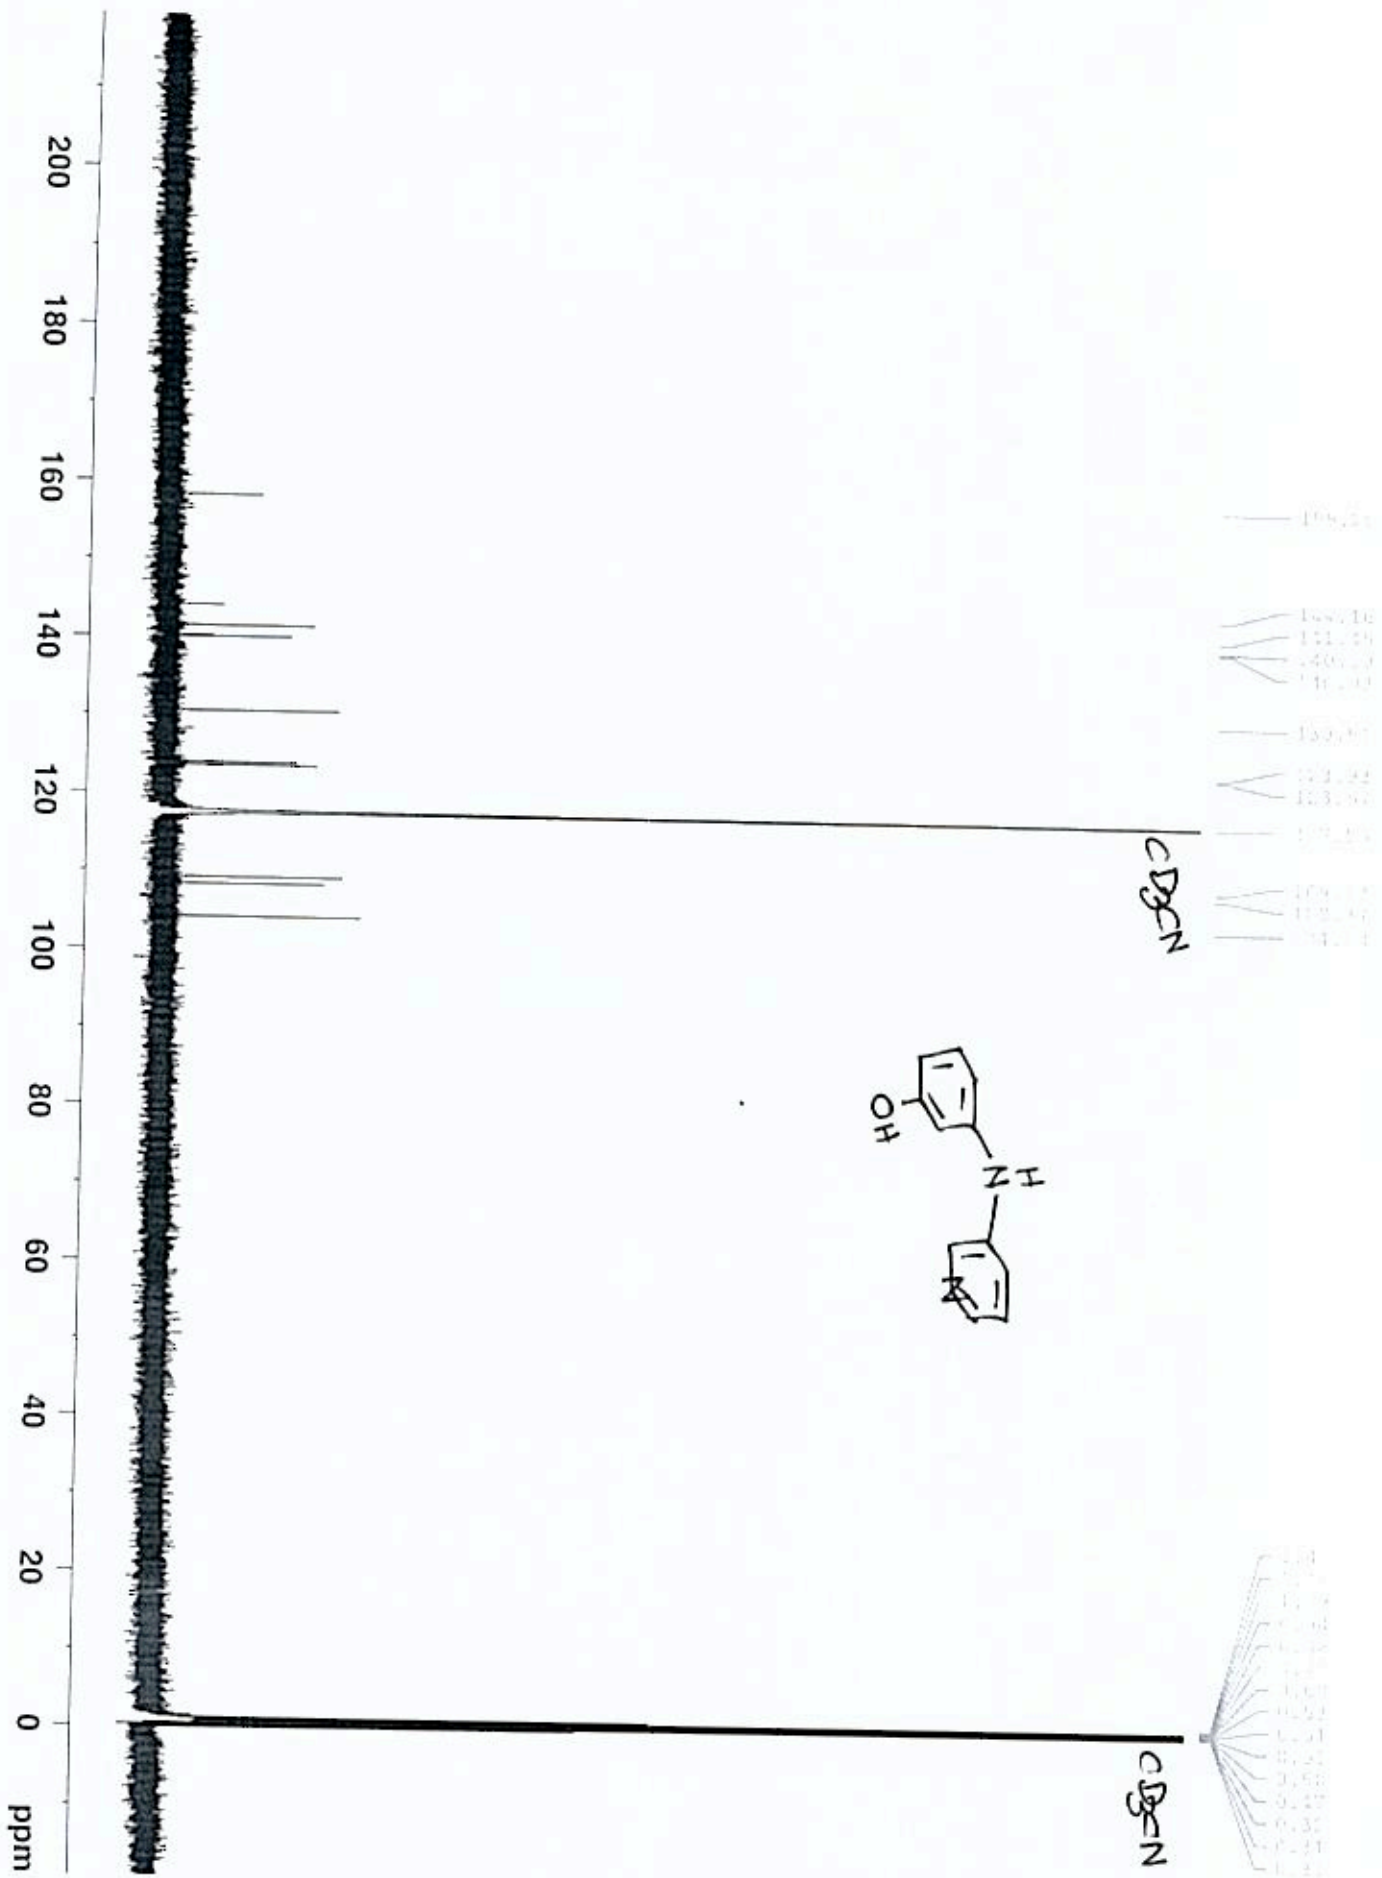

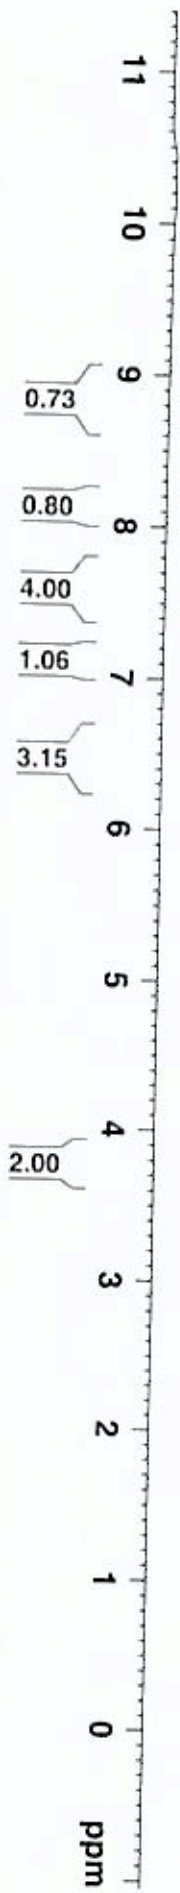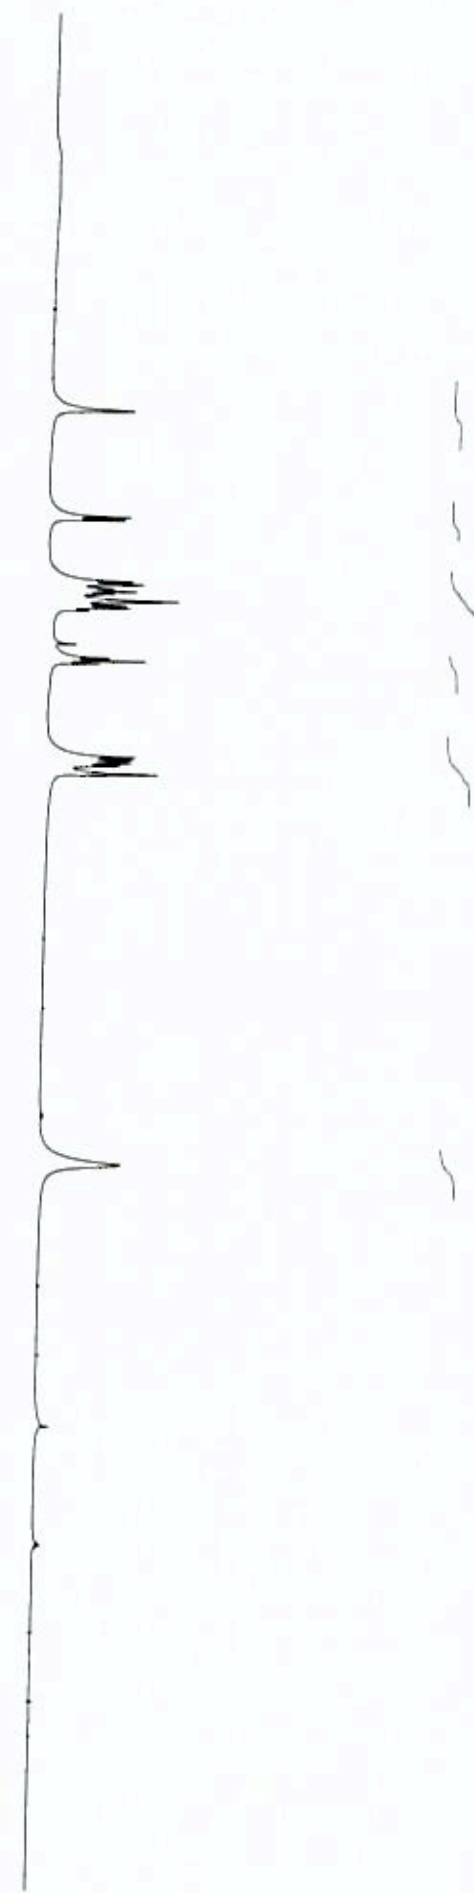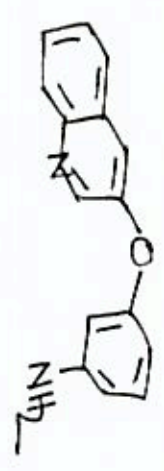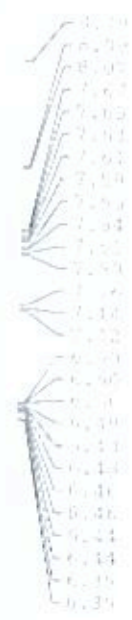

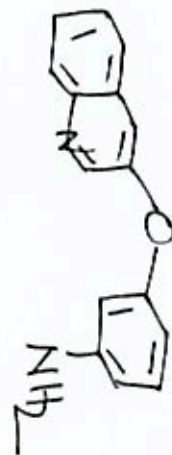

| Chemical Shift (ppm) | Integration |
|----------------------|-------------|
| 7.81                 | 1.00        |
| 7.71                 | 1.00        |
| 7.61                 | 1.00        |
| 7.51                 | 1.00        |
| 7.41                 | 1.00        |
| 7.31                 | 1.00        |
| 7.21                 | 1.00        |
| 7.11                 | 1.00        |
| 7.01                 | 1.00        |
| 6.91                 | 1.00        |
| 6.81                 | 1.00        |
| 6.71                 | 1.00        |
| 6.61                 | 1.00        |
| 6.51                 | 1.00        |
| 6.41                 | 1.00        |
| 6.31                 | 1.00        |
| 6.21                 | 1.00        |
| 6.11                 | 1.00        |
| 6.01                 | 1.00        |
| 5.91                 | 1.00        |
| 5.81                 | 1.00        |
| 5.71                 | 1.00        |
| 5.61                 | 1.00        |
| 5.51                 | 1.00        |
| 5.41                 | 1.00        |
| 5.31                 | 1.00        |
| 5.21                 | 1.00        |
| 5.11                 | 1.00        |
| 5.01                 | 1.00        |
| 4.91                 | 1.00        |
| 4.81                 | 1.00        |
| 4.71                 | 1.00        |
| 4.61                 | 1.00        |
| 4.51                 | 1.00        |
| 4.41                 | 1.00        |
| 4.31                 | 1.00        |
| 4.21                 | 1.00        |
| 4.11                 | 1.00        |
| 4.01                 | 1.00        |
| 3.91                 | 1.00        |
| 3.81                 | 1.00        |
| 3.71                 | 1.00        |
| 3.61                 | 1.00        |
| 3.51                 | 1.00        |
| 3.41                 | 1.00        |
| 3.31                 | 1.00        |
| 3.21                 | 1.00        |
| 3.11                 | 1.00        |
| 3.01                 | 1.00        |
| 2.91                 | 1.00        |
| 2.81                 | 1.00        |
| 2.71                 | 1.00        |
| 2.61                 | 1.00        |
| 2.51                 | 1.00        |
| 2.41                 | 1.00        |
| 2.31                 | 1.00        |
| 2.21                 | 1.00        |
| 2.11                 | 1.00        |
| 2.01                 | 1.00        |
| 1.91                 | 1.00        |
| 1.81                 | 1.00        |
| 1.71                 | 1.00        |
| 1.61                 | 1.00        |
| 1.51                 | 1.00        |
| 1.41                 | 1.00        |
| 1.31                 | 1.00        |
| 1.21                 | 1.00        |
| 1.11                 | 1.00        |
| 1.01                 | 1.00        |
| 0.91                 | 1.00        |
| 0.81                 | 1.00        |
| 0.71                 | 1.00        |
| 0.61                 | 1.00        |
| 0.51                 | 1.00        |
| 0.41                 | 1.00        |
| 0.31                 | 1.00        |
| 0.21                 | 1.00        |
| 0.11                 | 1.00        |
| 0.01                 | 1.00        |

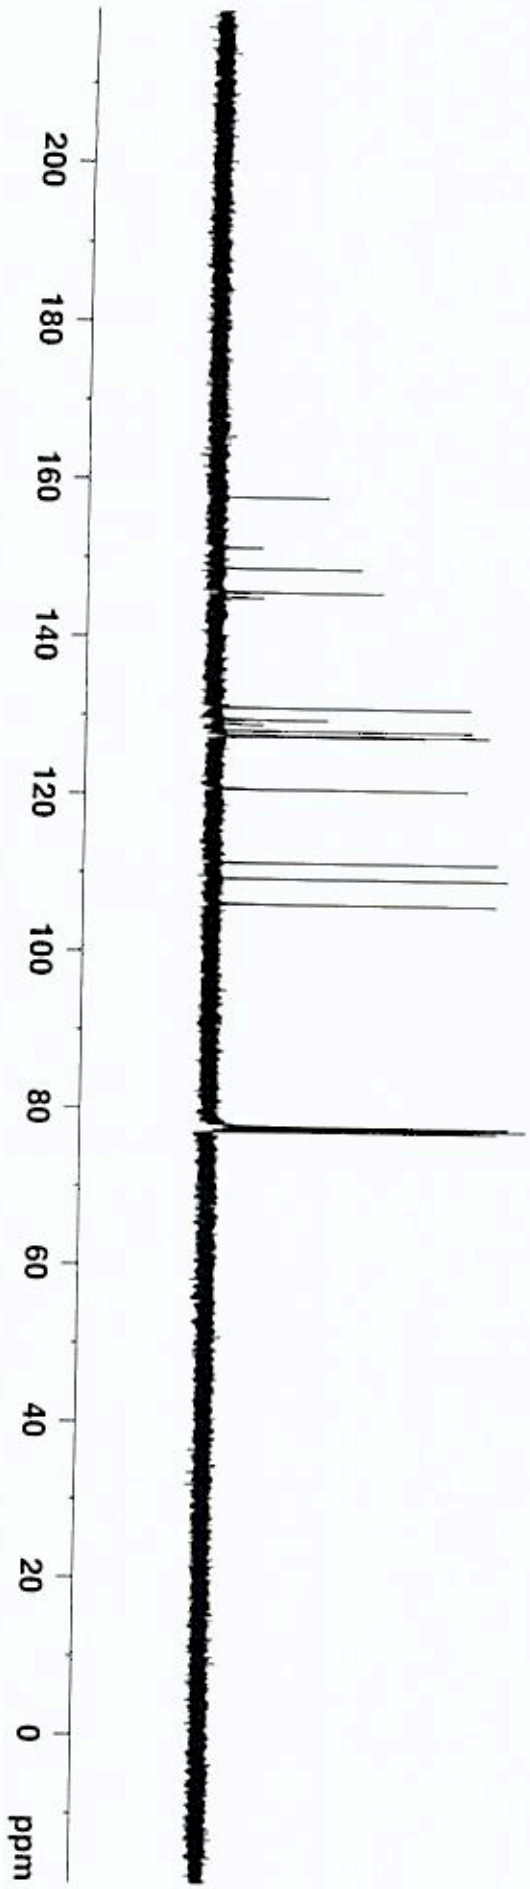

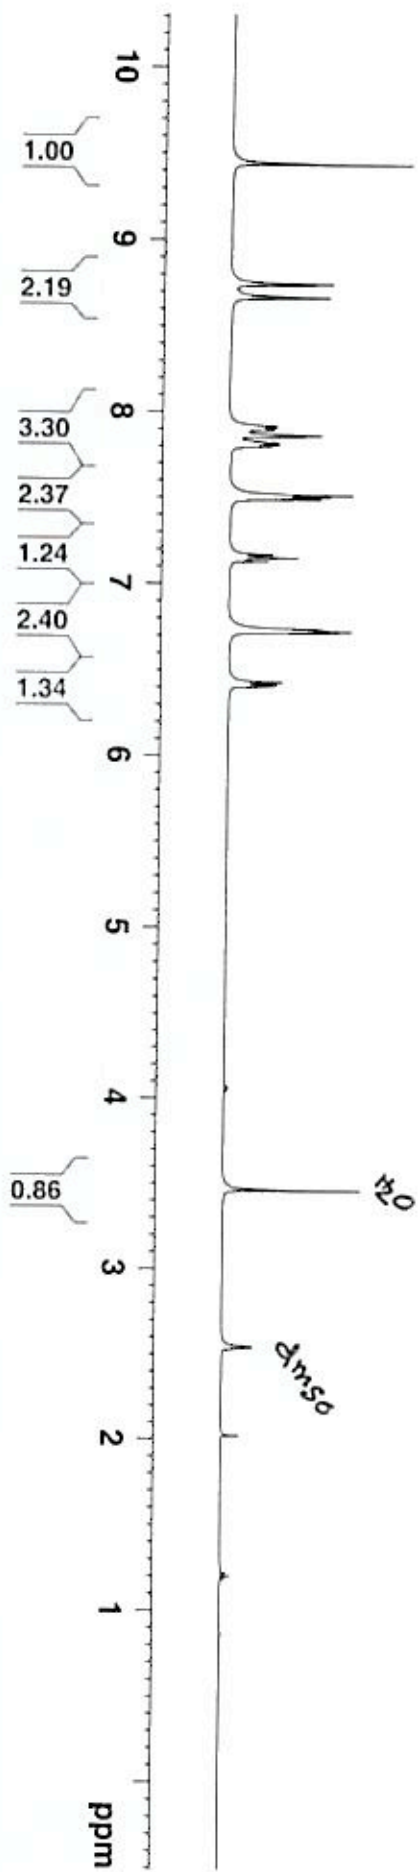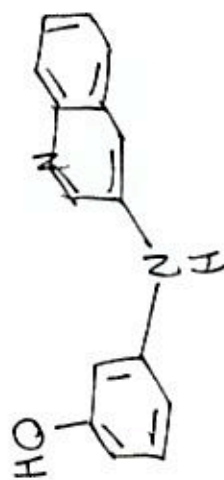

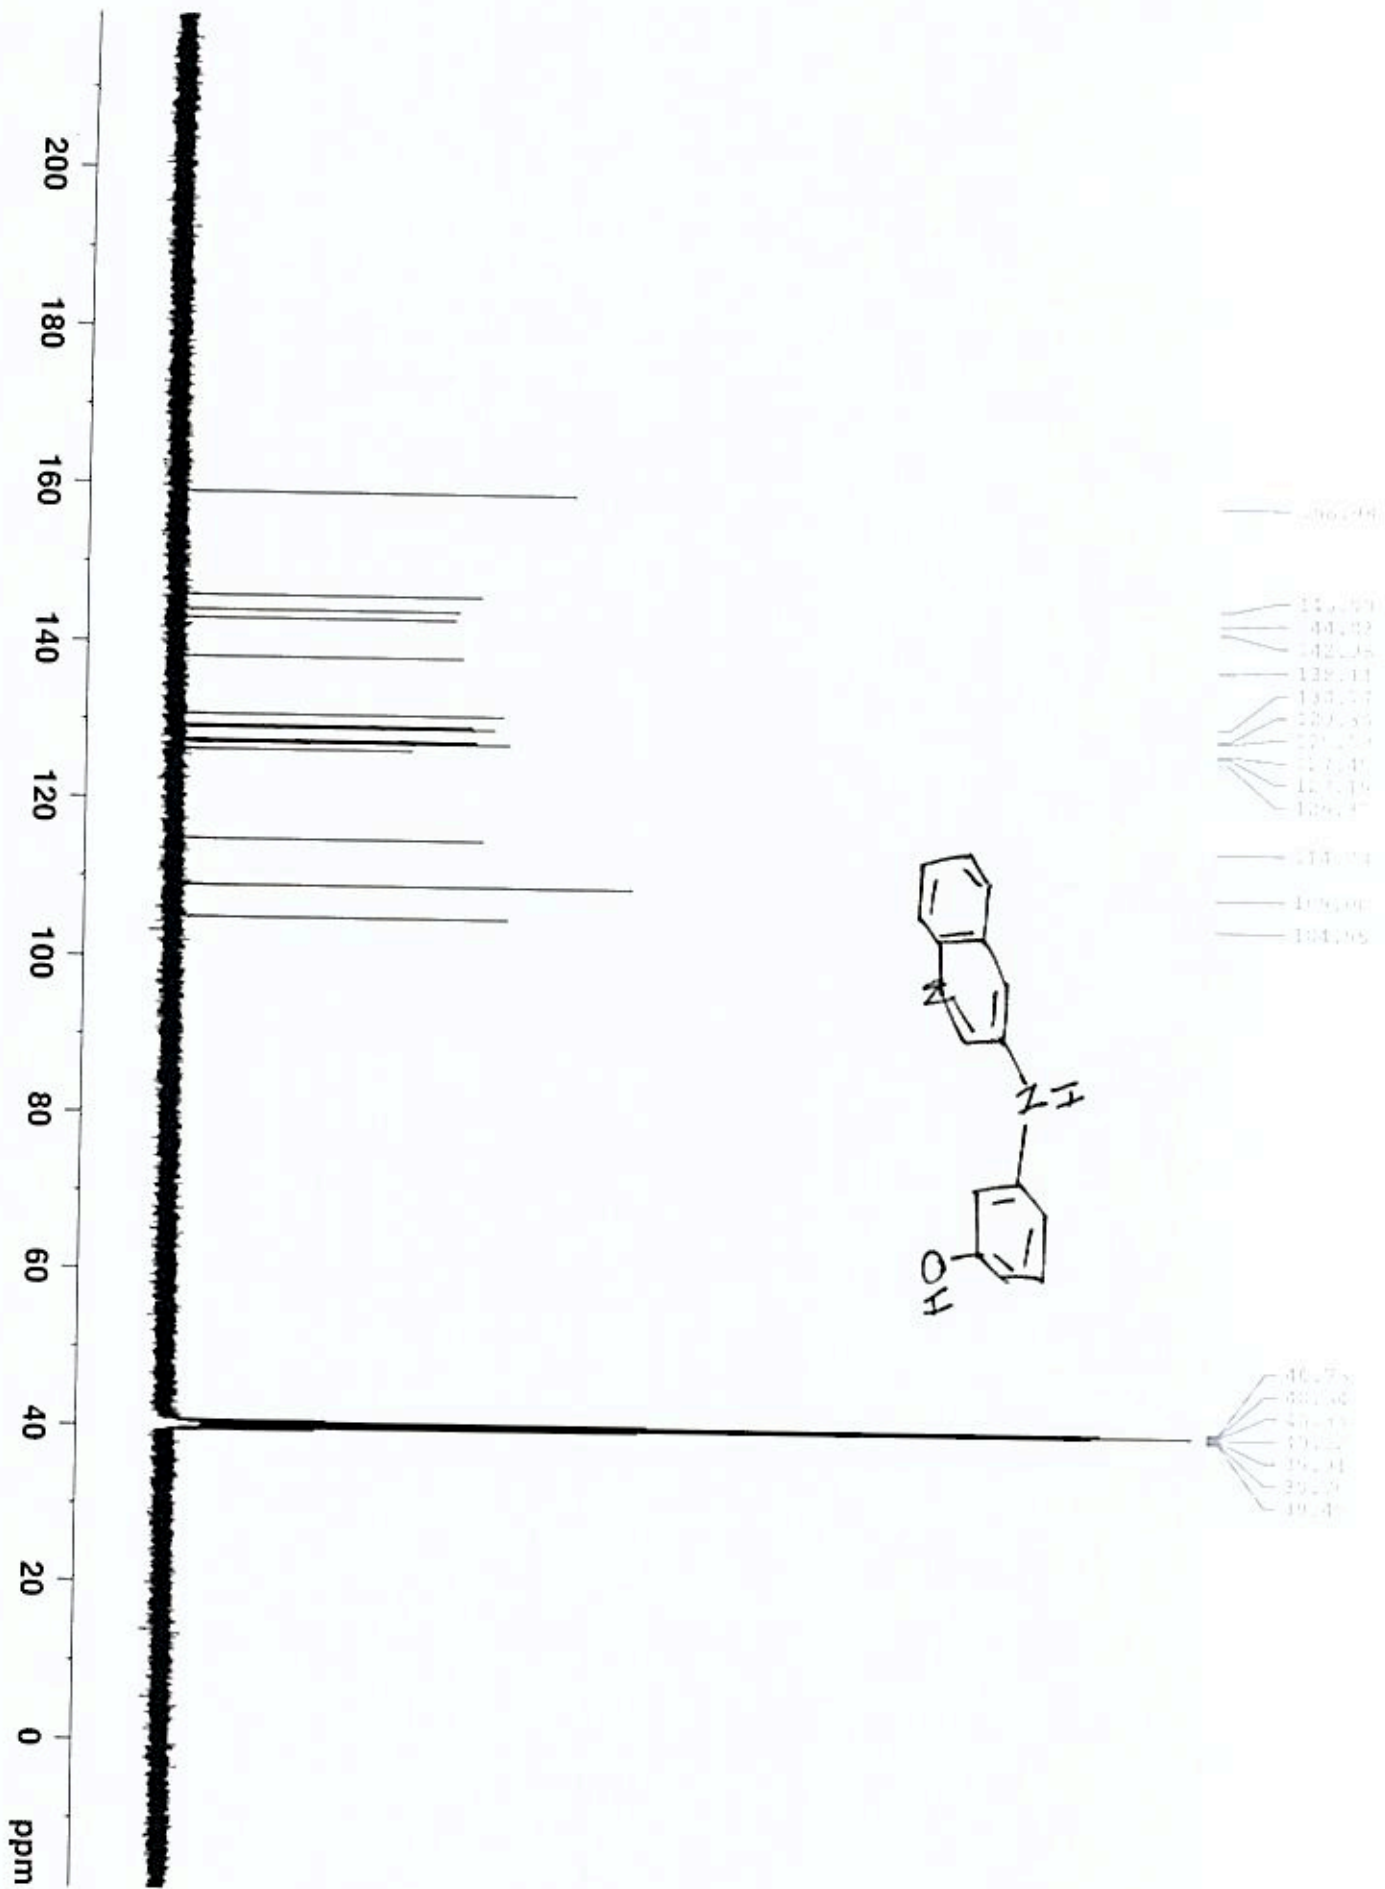



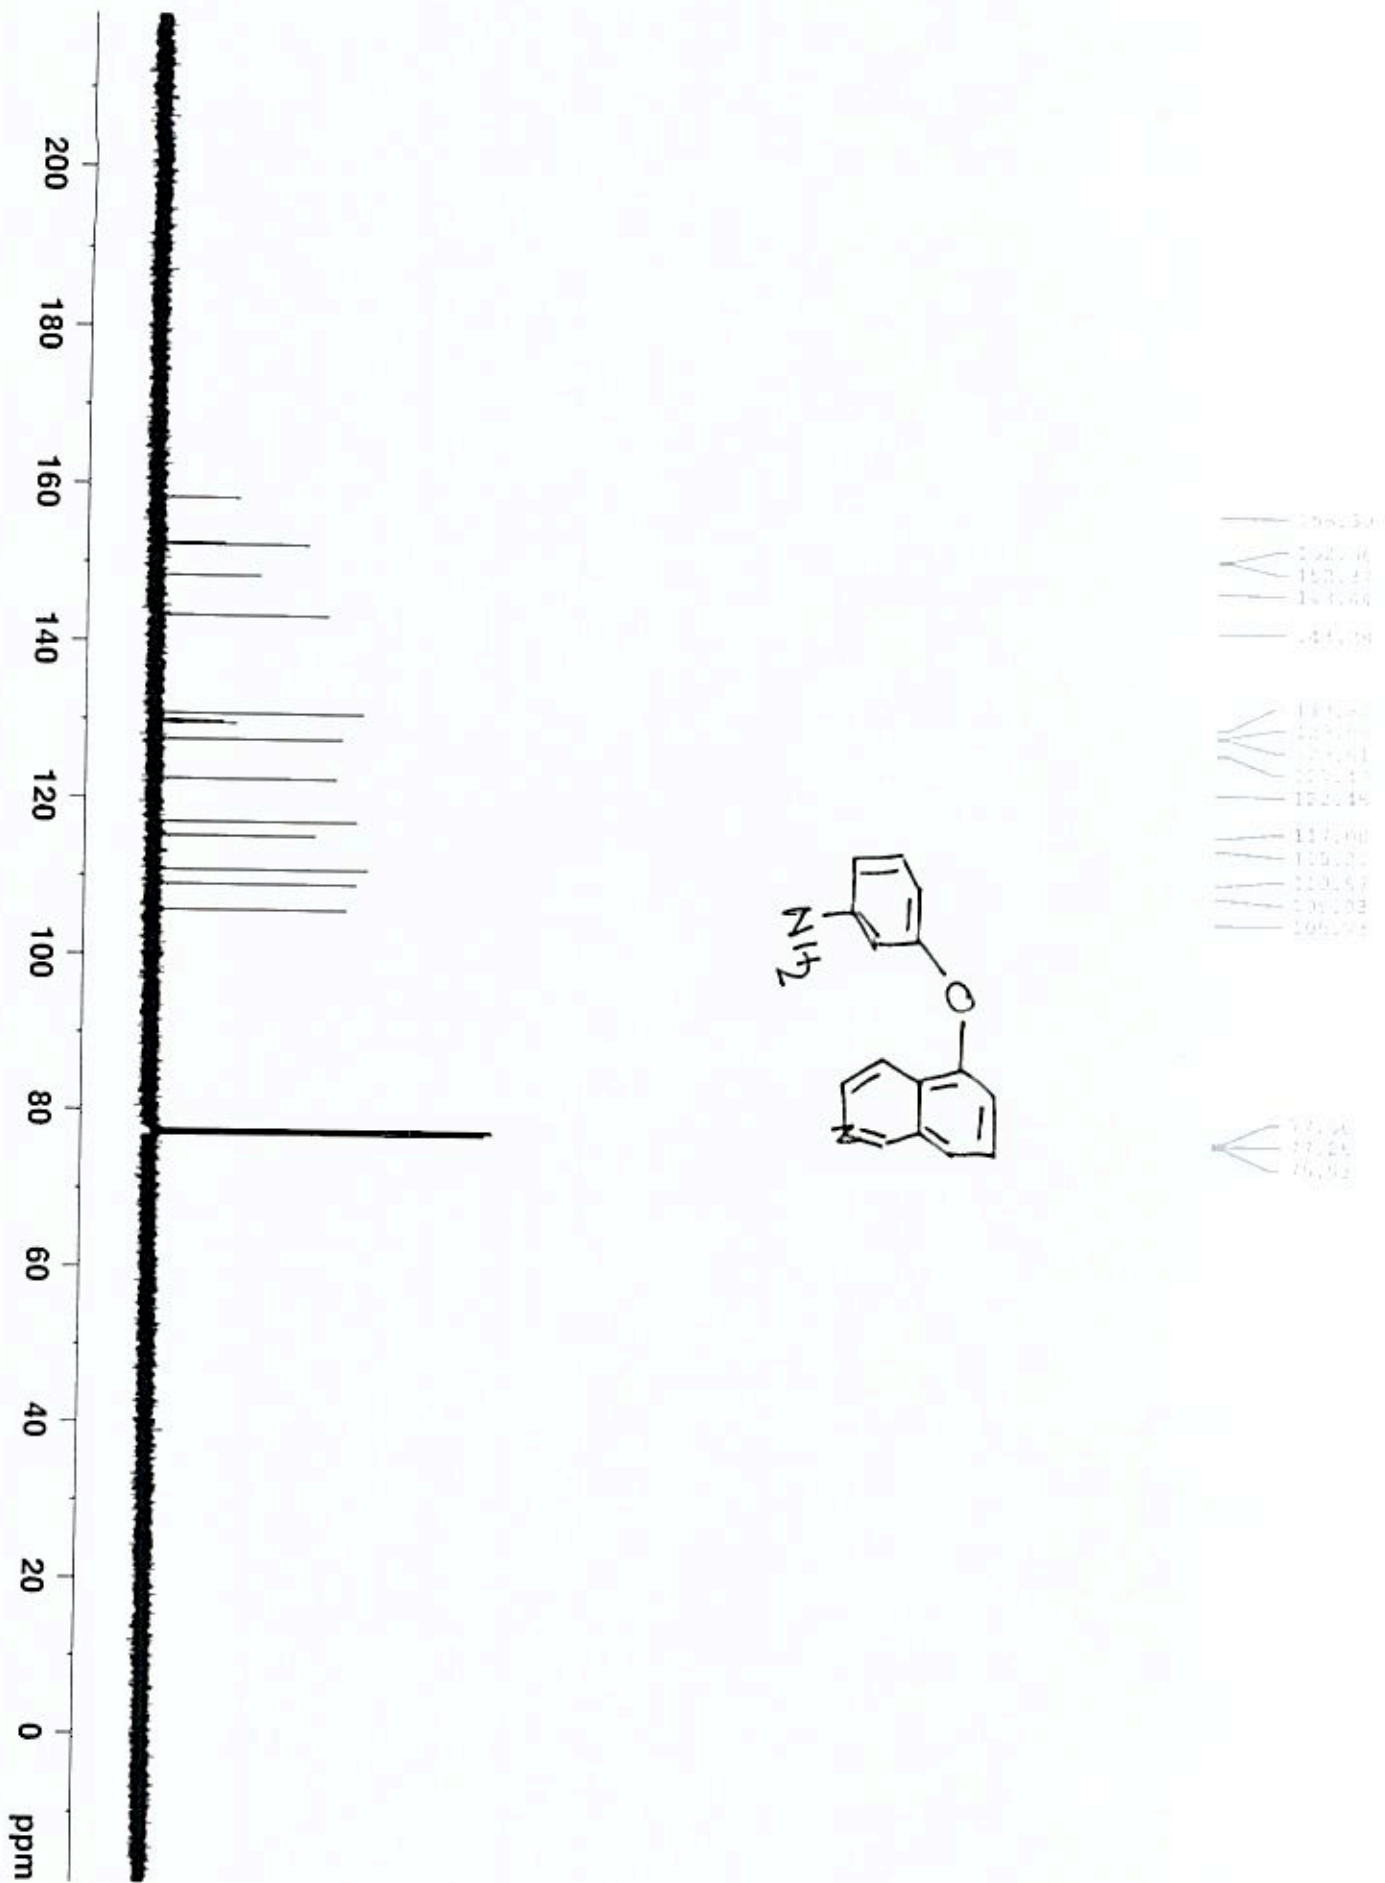

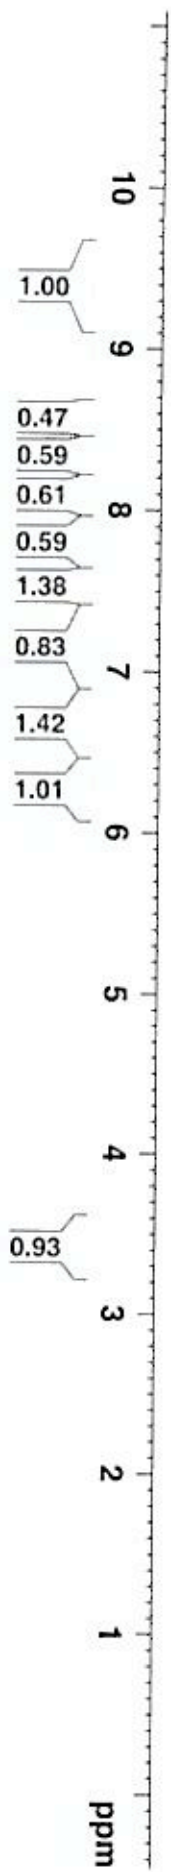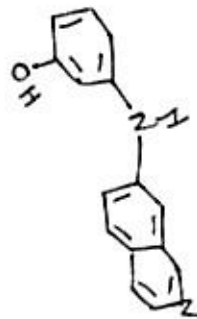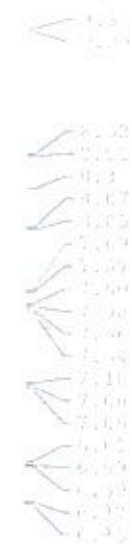



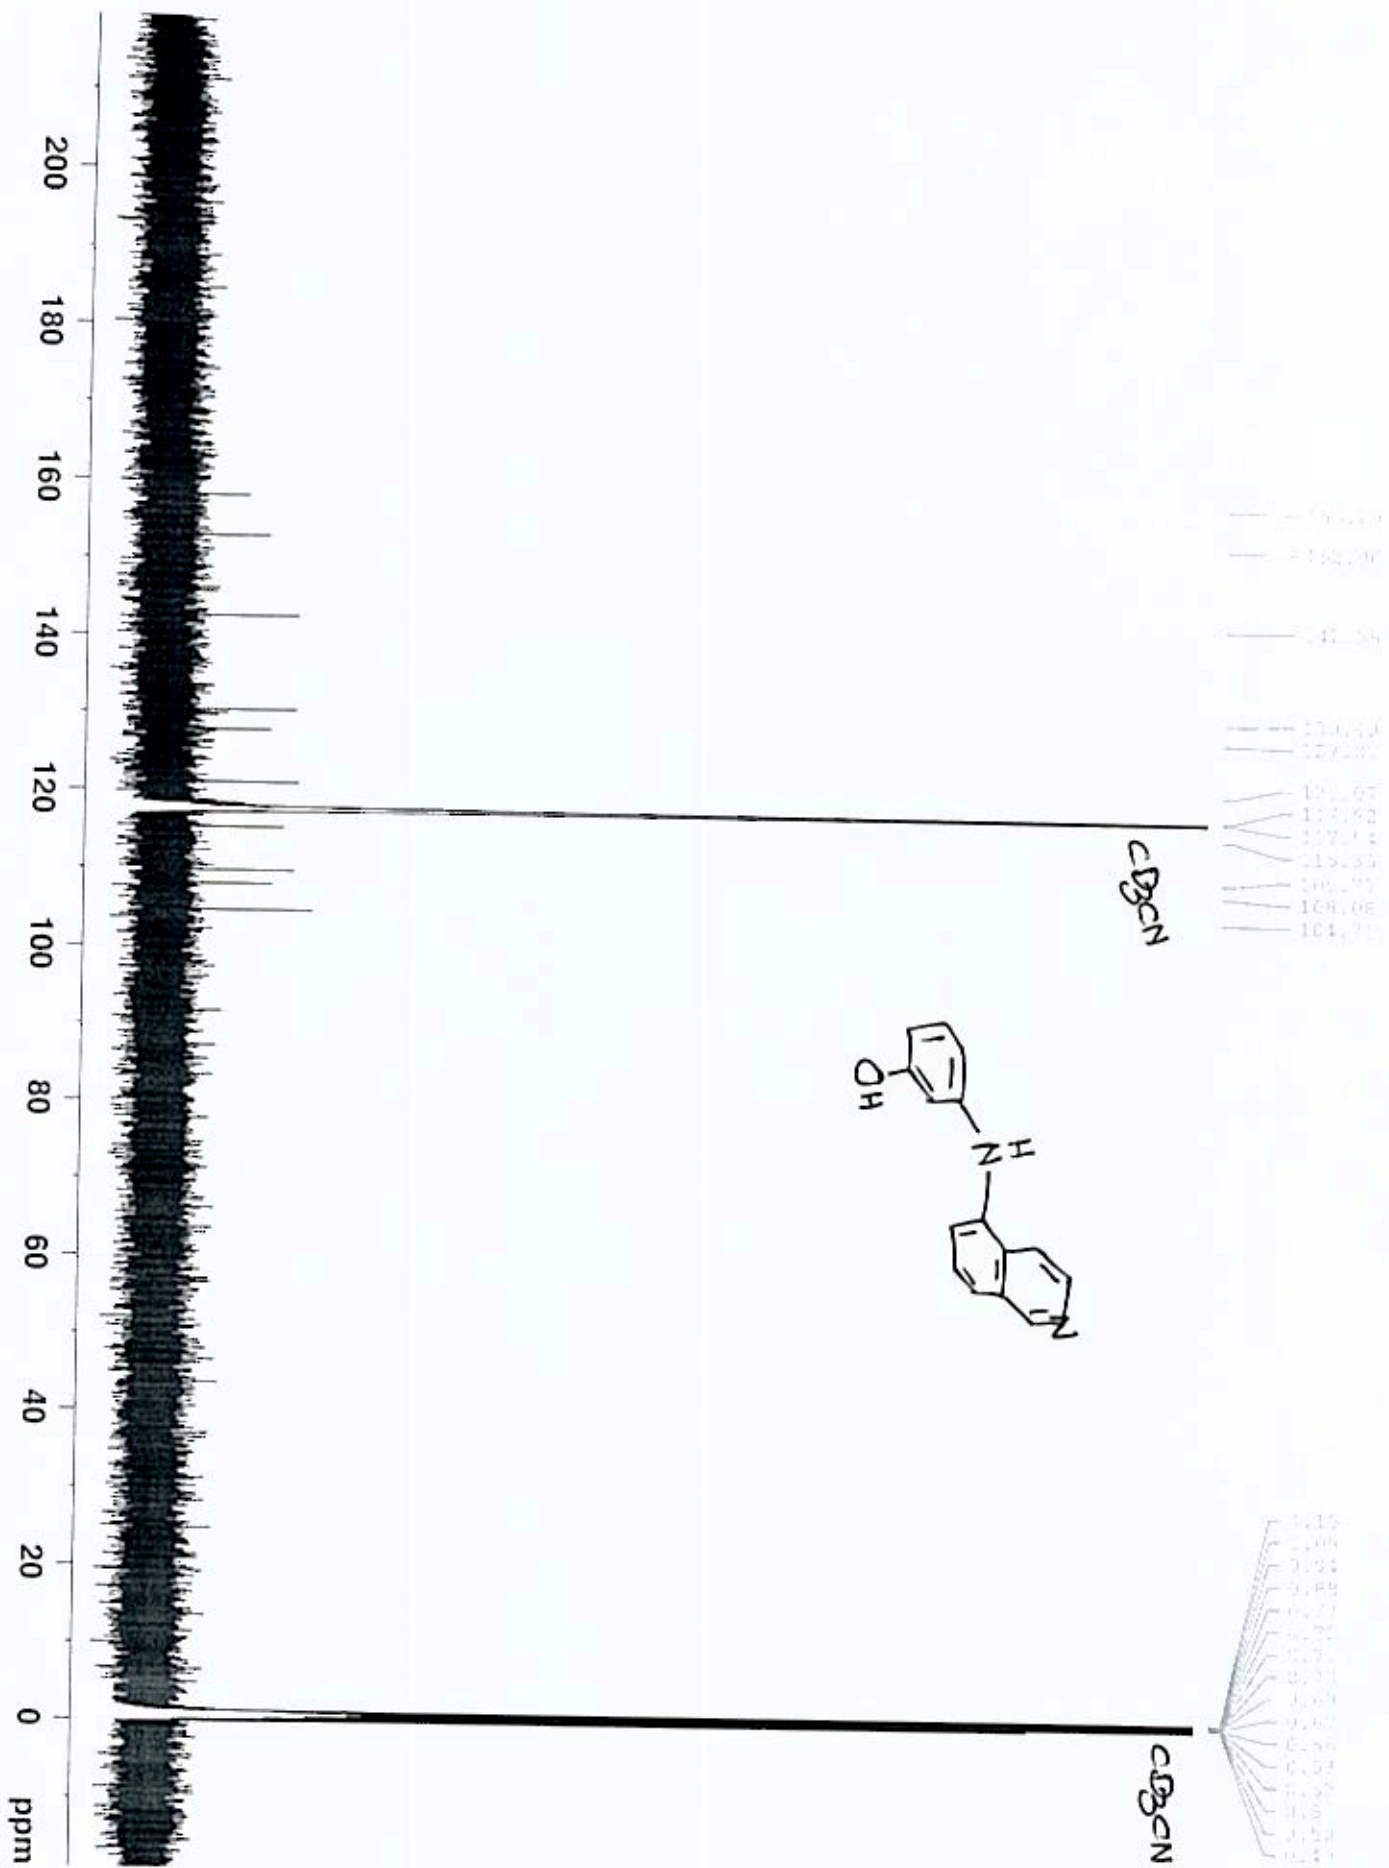

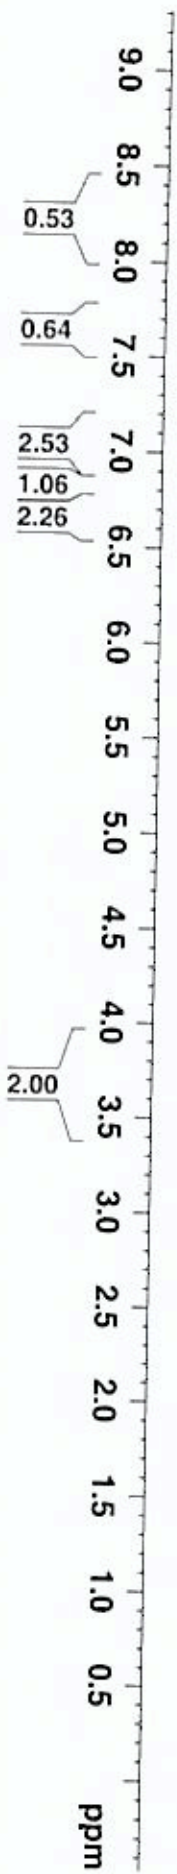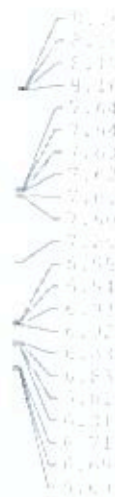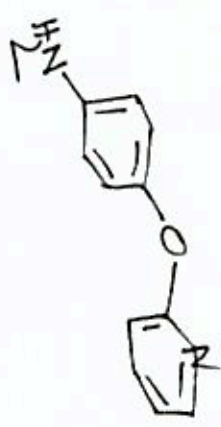

2.00

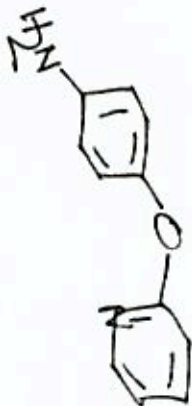

- 161.38
- 147.38
- 146.15
- 141.59
- 140.85
- 122.34
- 117.55
- 116.17
- 110.91

- 77.46
- 77.02
- 76.57

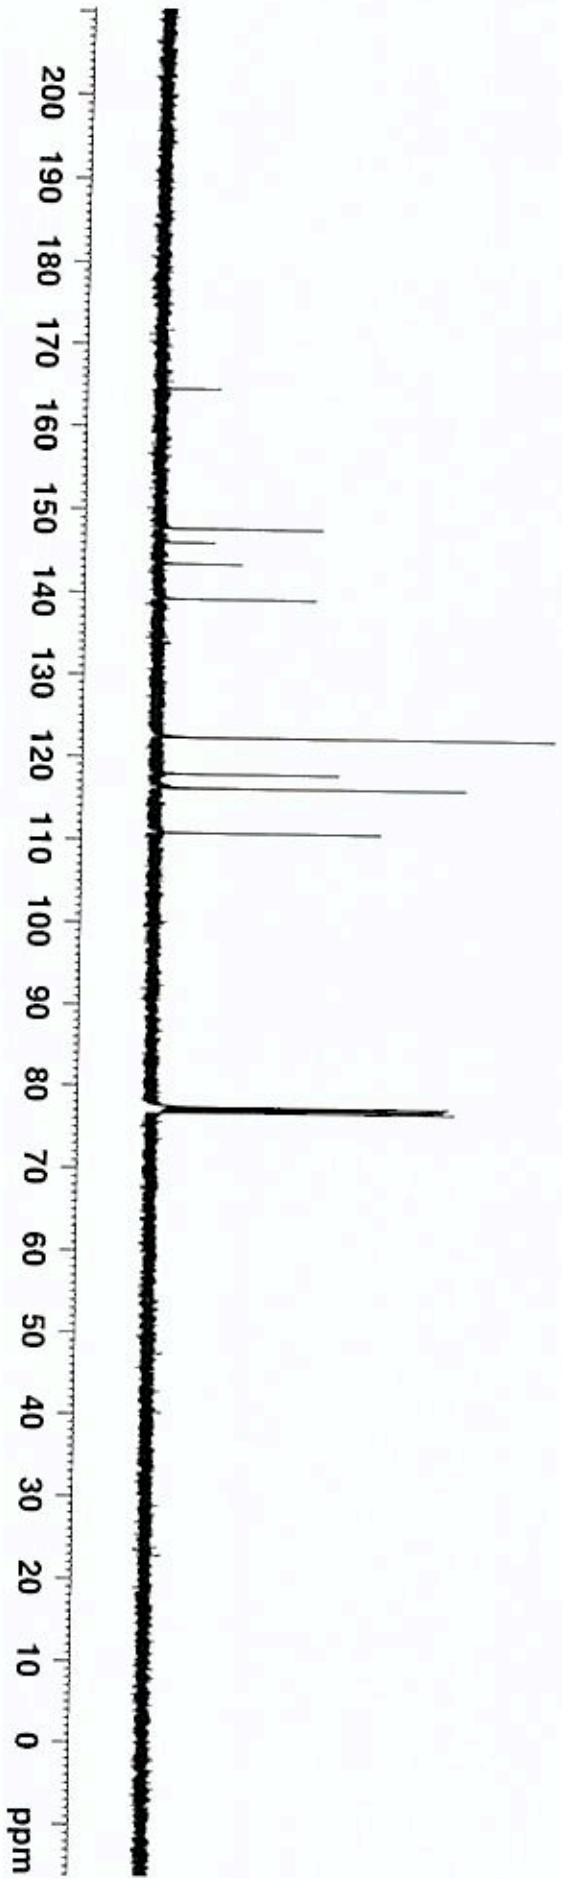

210 200 190 180 170 160 150 140 130 120 110 100 90 80 70 60 50 40 30 20 10 0 ppm

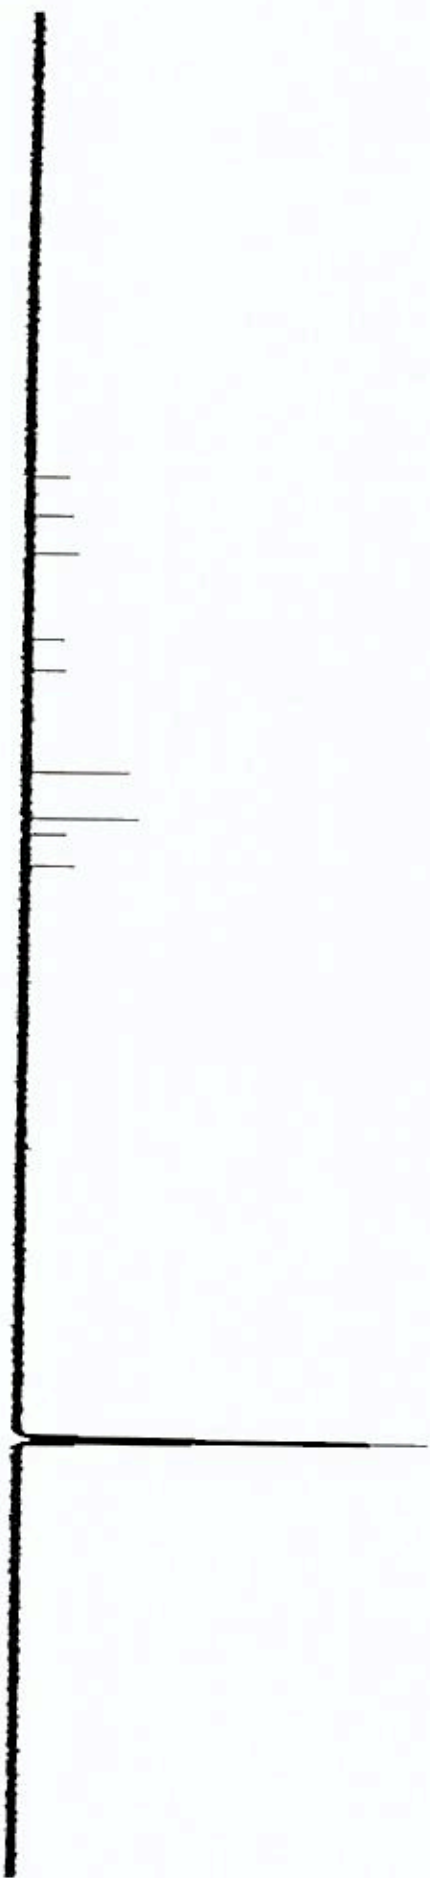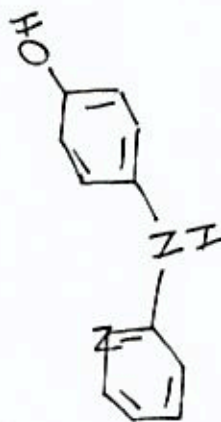

- 155.88
- 149.26
- 145.98
- 139.78
- 139.68
- 122.48
- 115.88
- 115.78
- 110.28

- 40.00
- 39.98
- 39.96
- 39.94
- 39.92
- 39.90
- 39.88
- 39.86
- 39.84
- 39.82
- 39.80

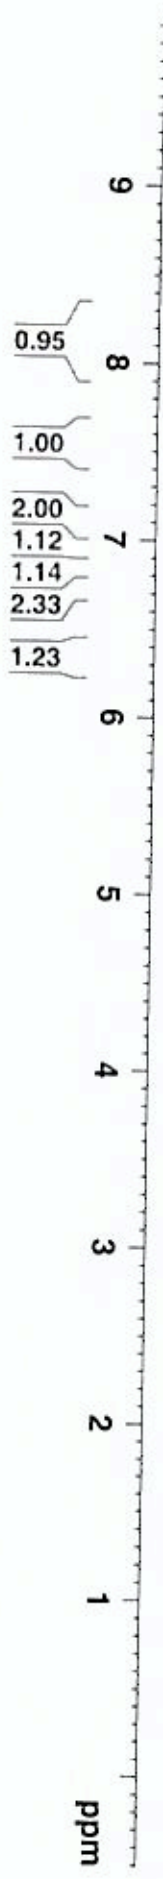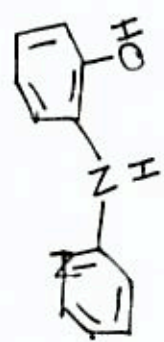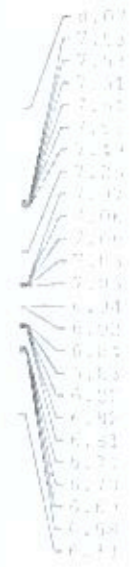

200  
180  
160  
140  
120  
100  
80  
60  
40  
20  
0  
ppm

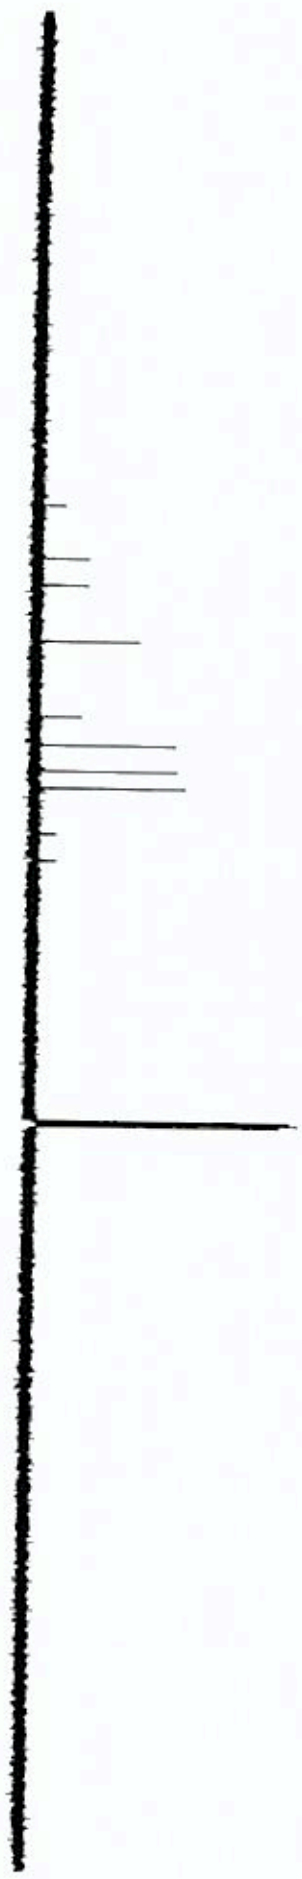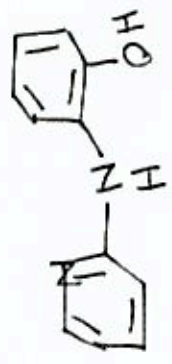

- 155.47
- 149.89
- 149.36
- 138.29
- 125.31
- 125.27
- 122.31
- 120.29
- 118.11
- 115.58

- 77.33
- 77.06
- 76.71

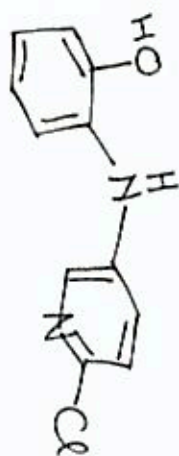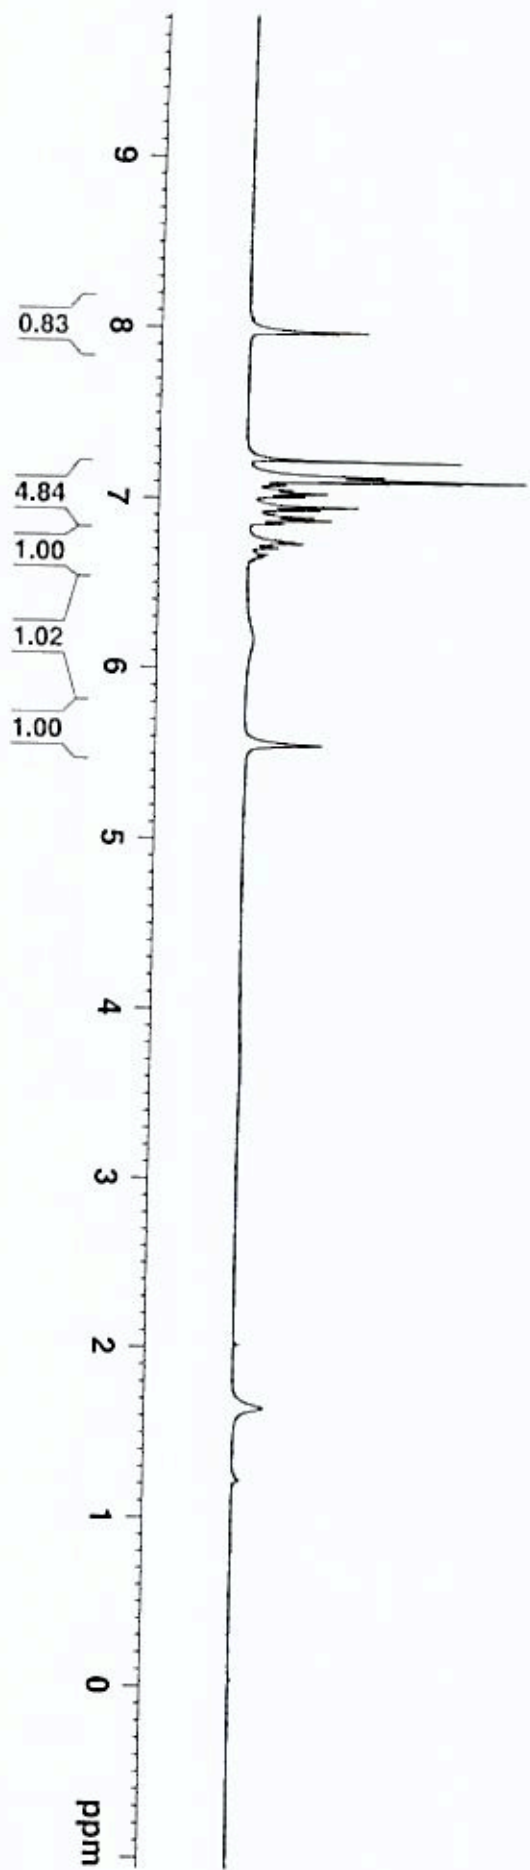







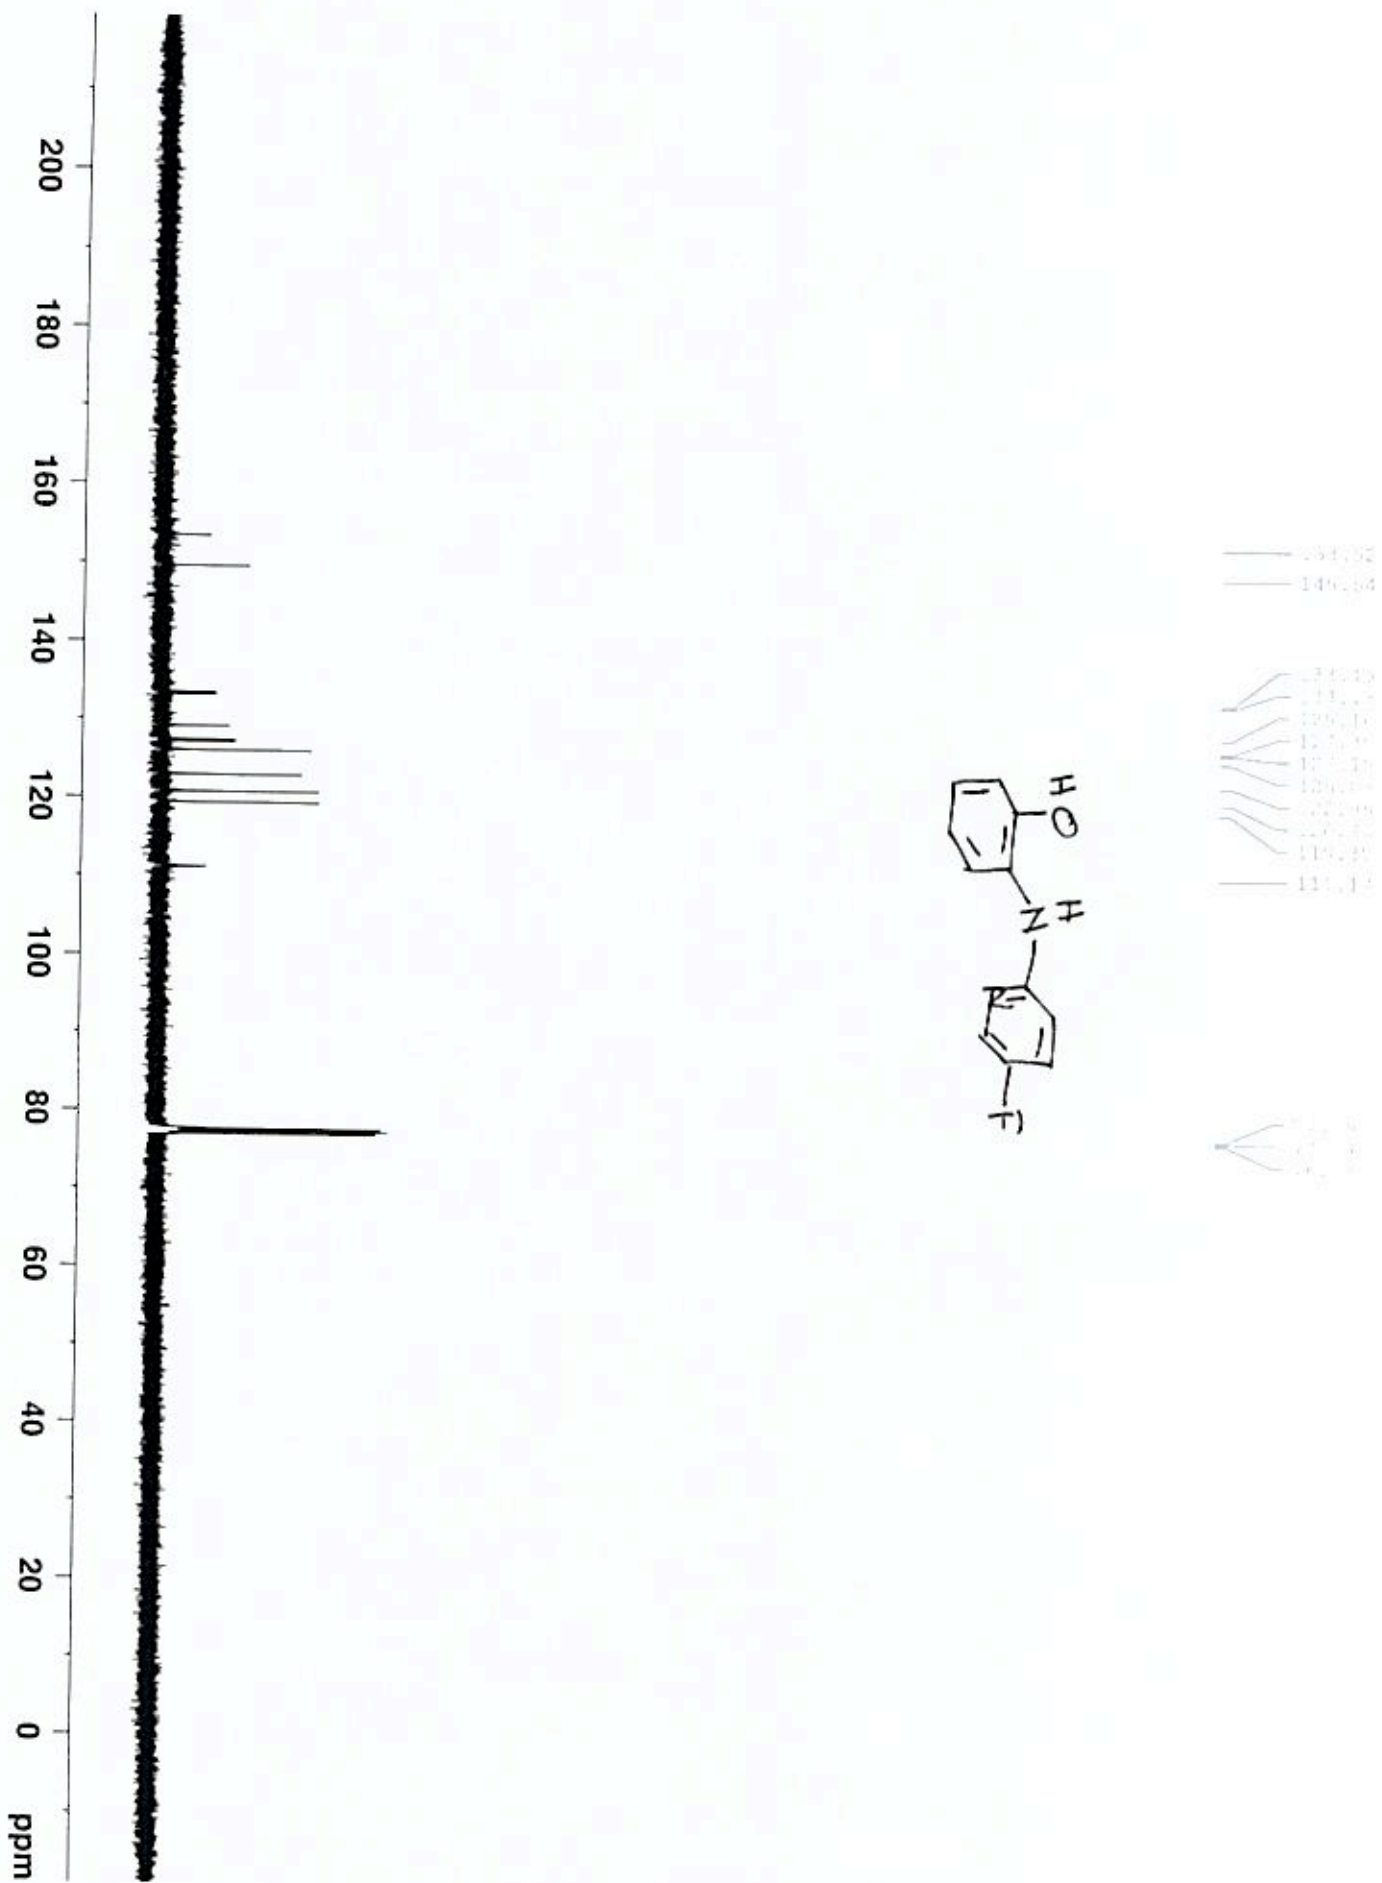

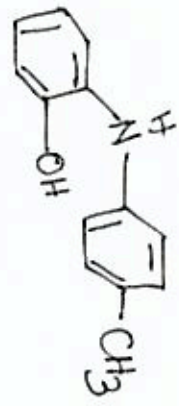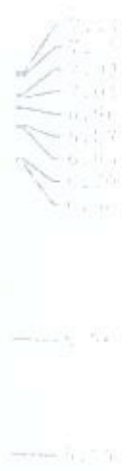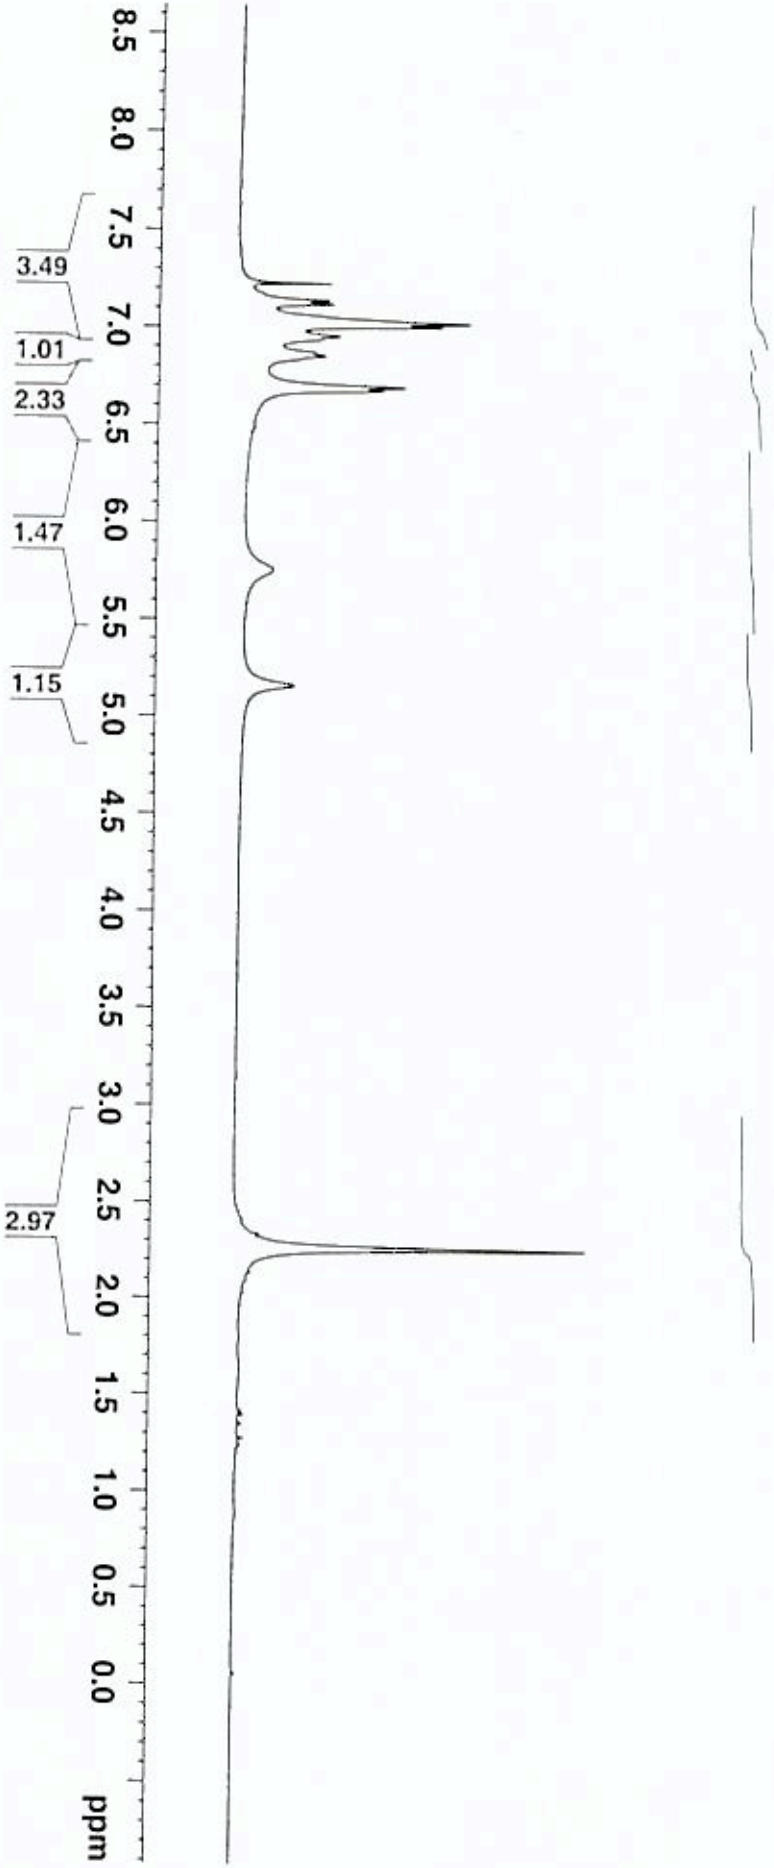

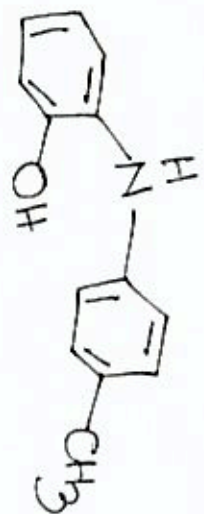

11/11/11

11/11/11

11/11/11

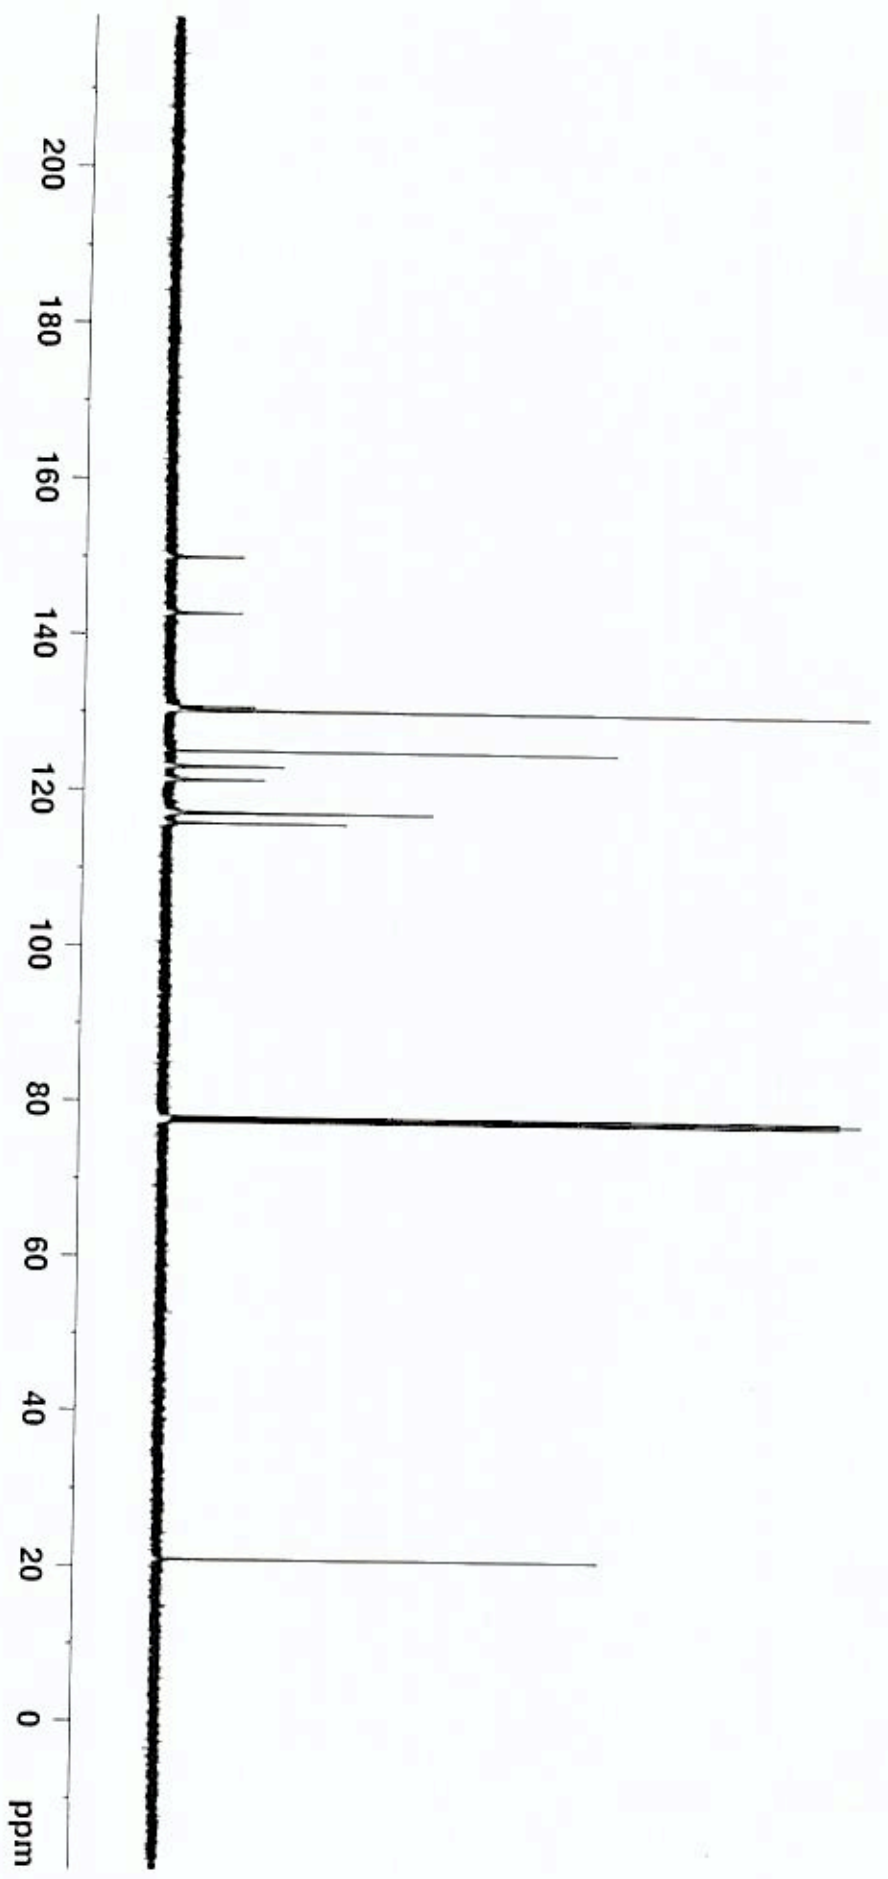

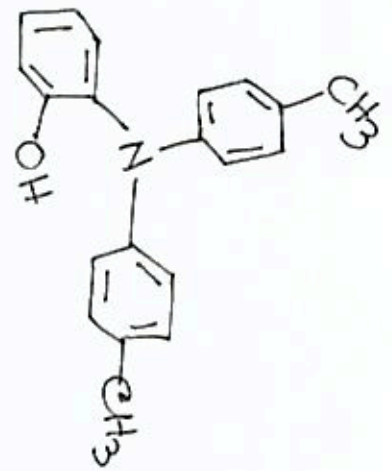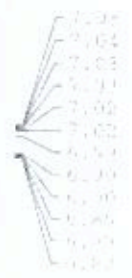

1.23

6.62

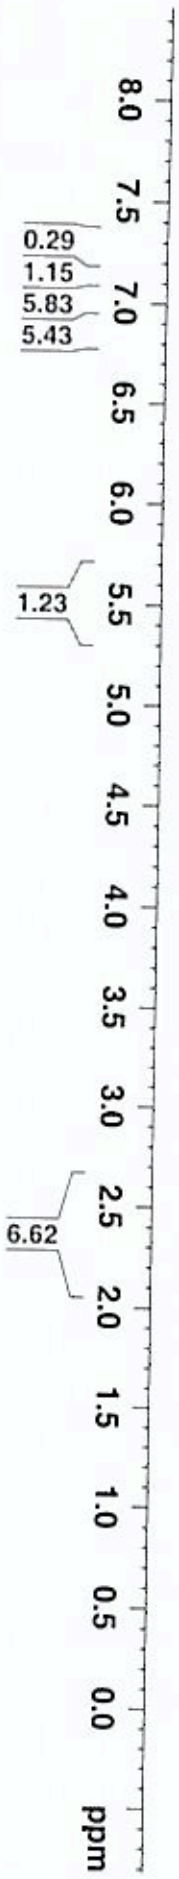

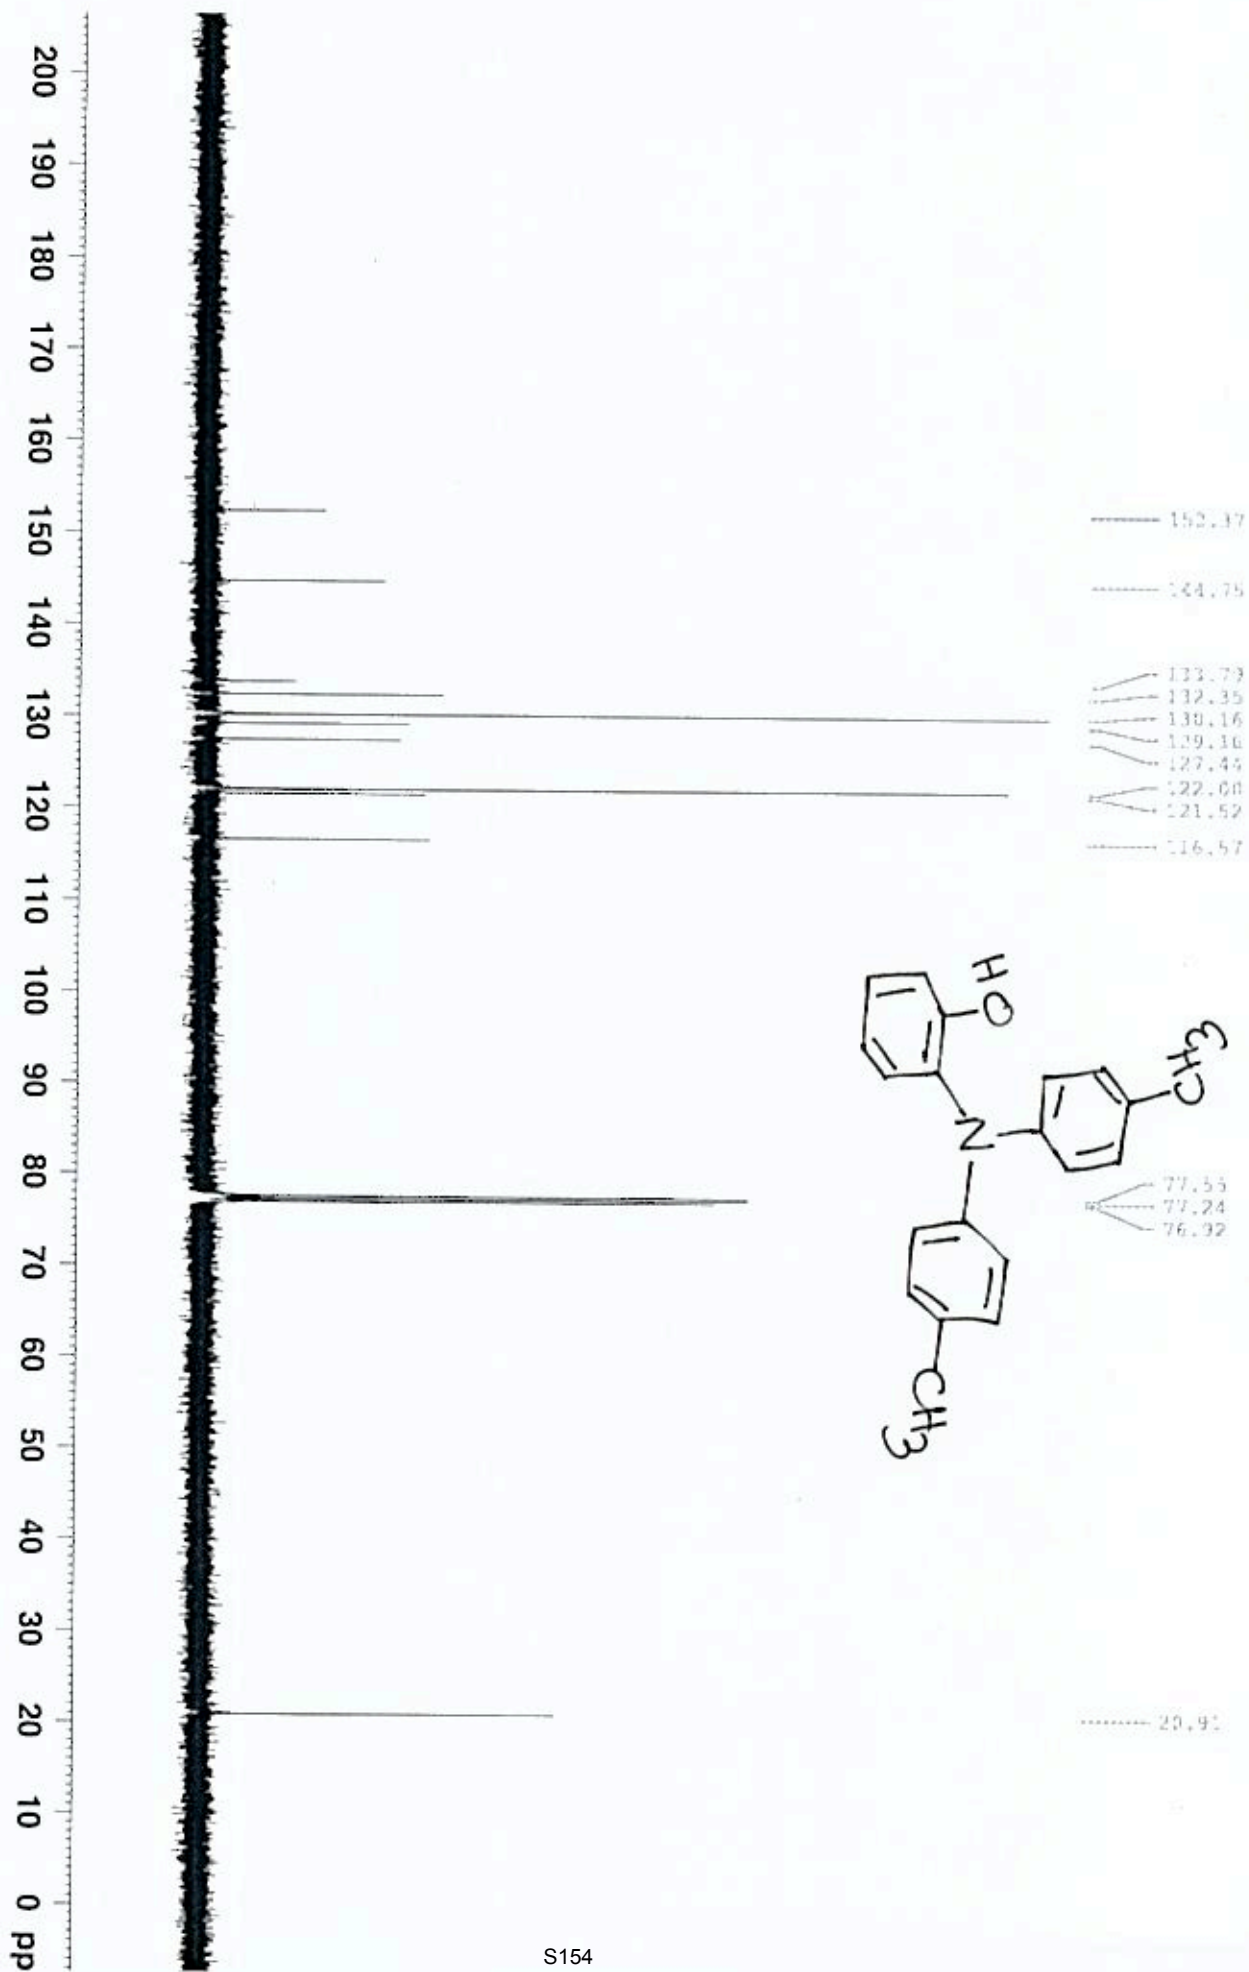

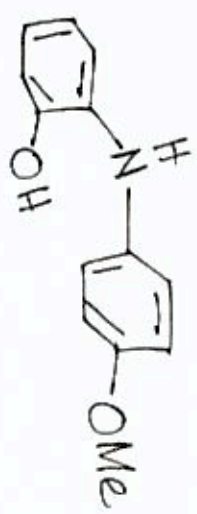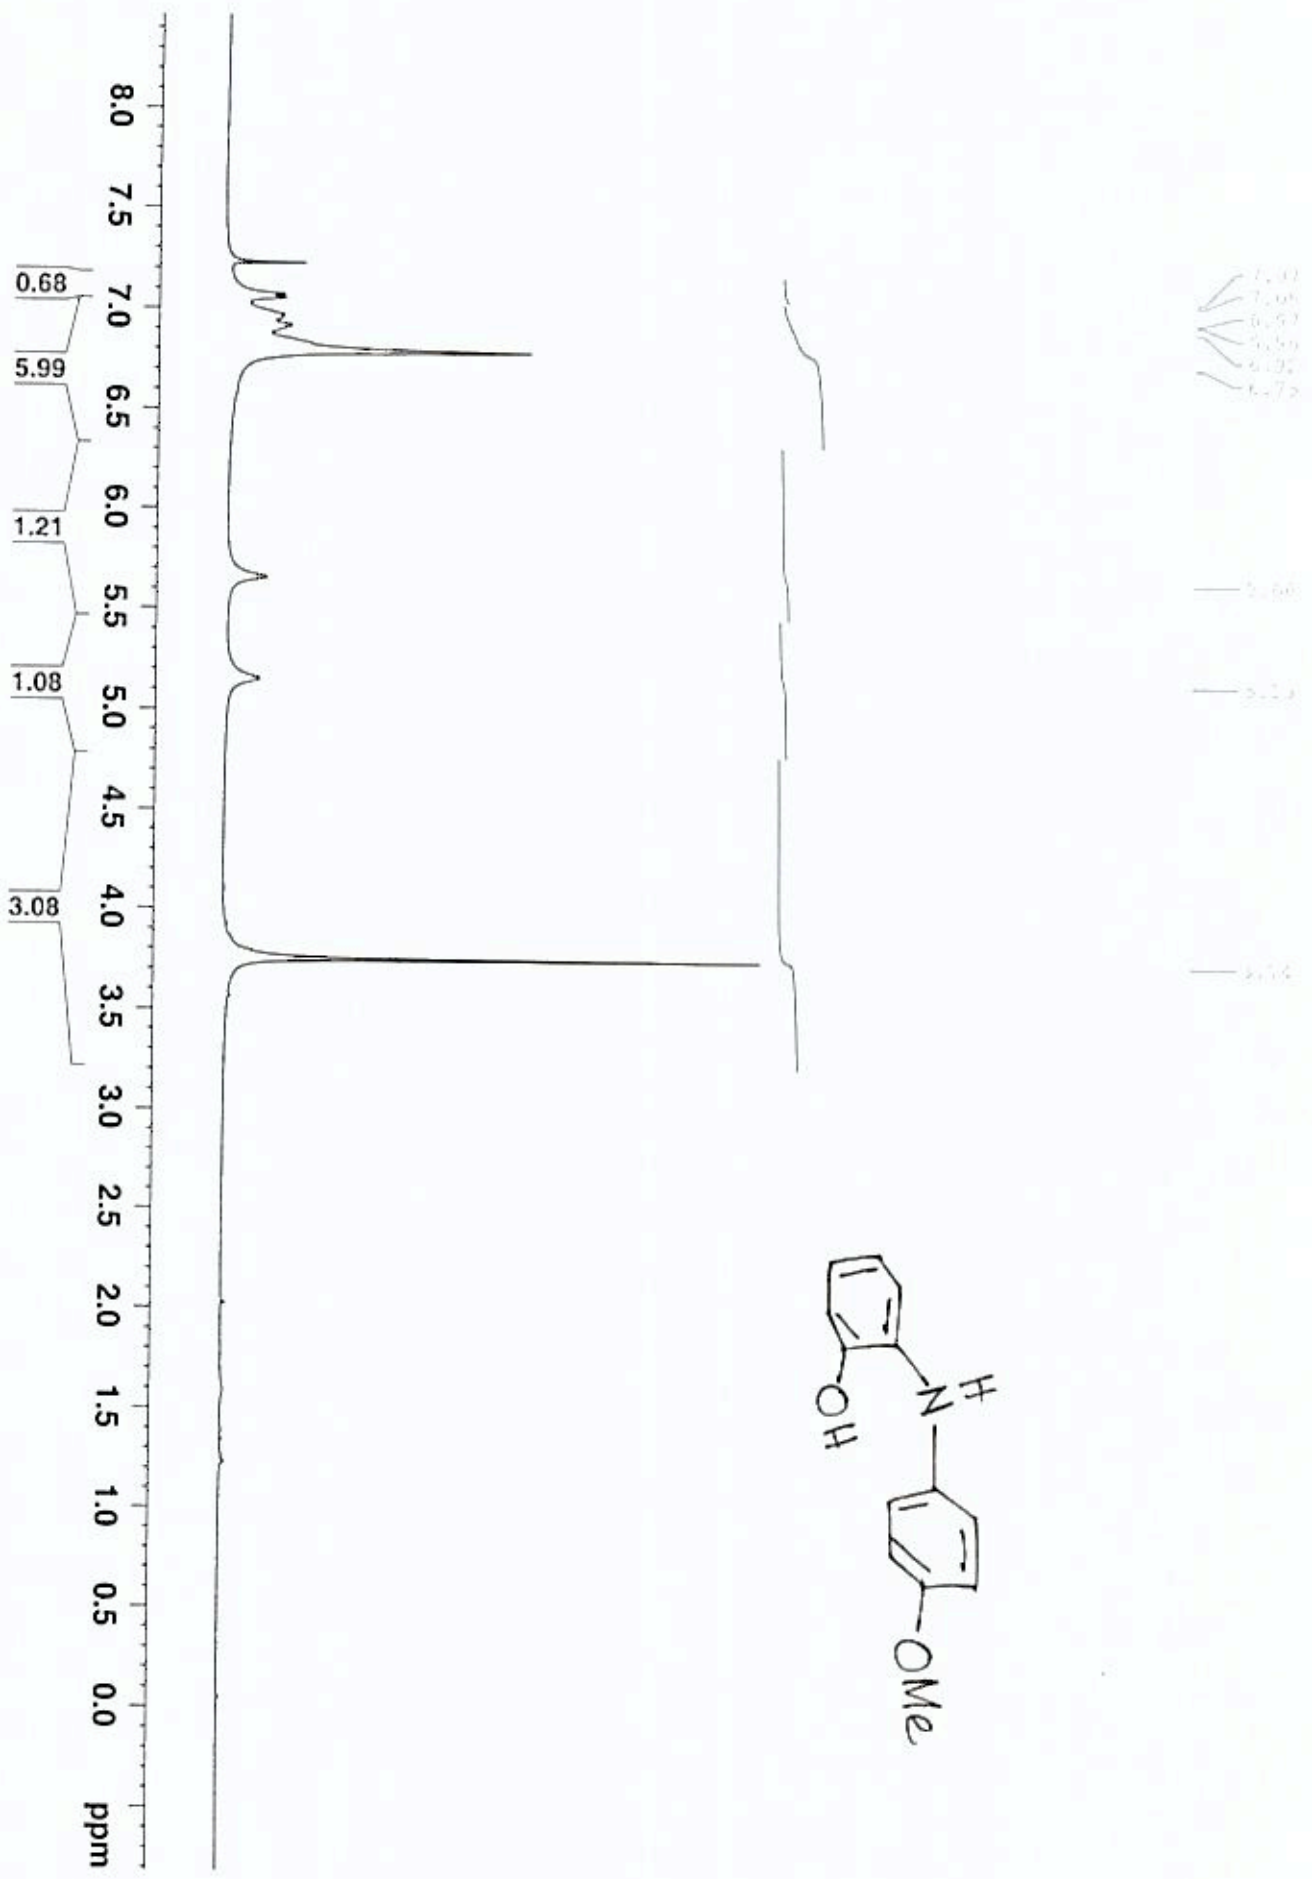

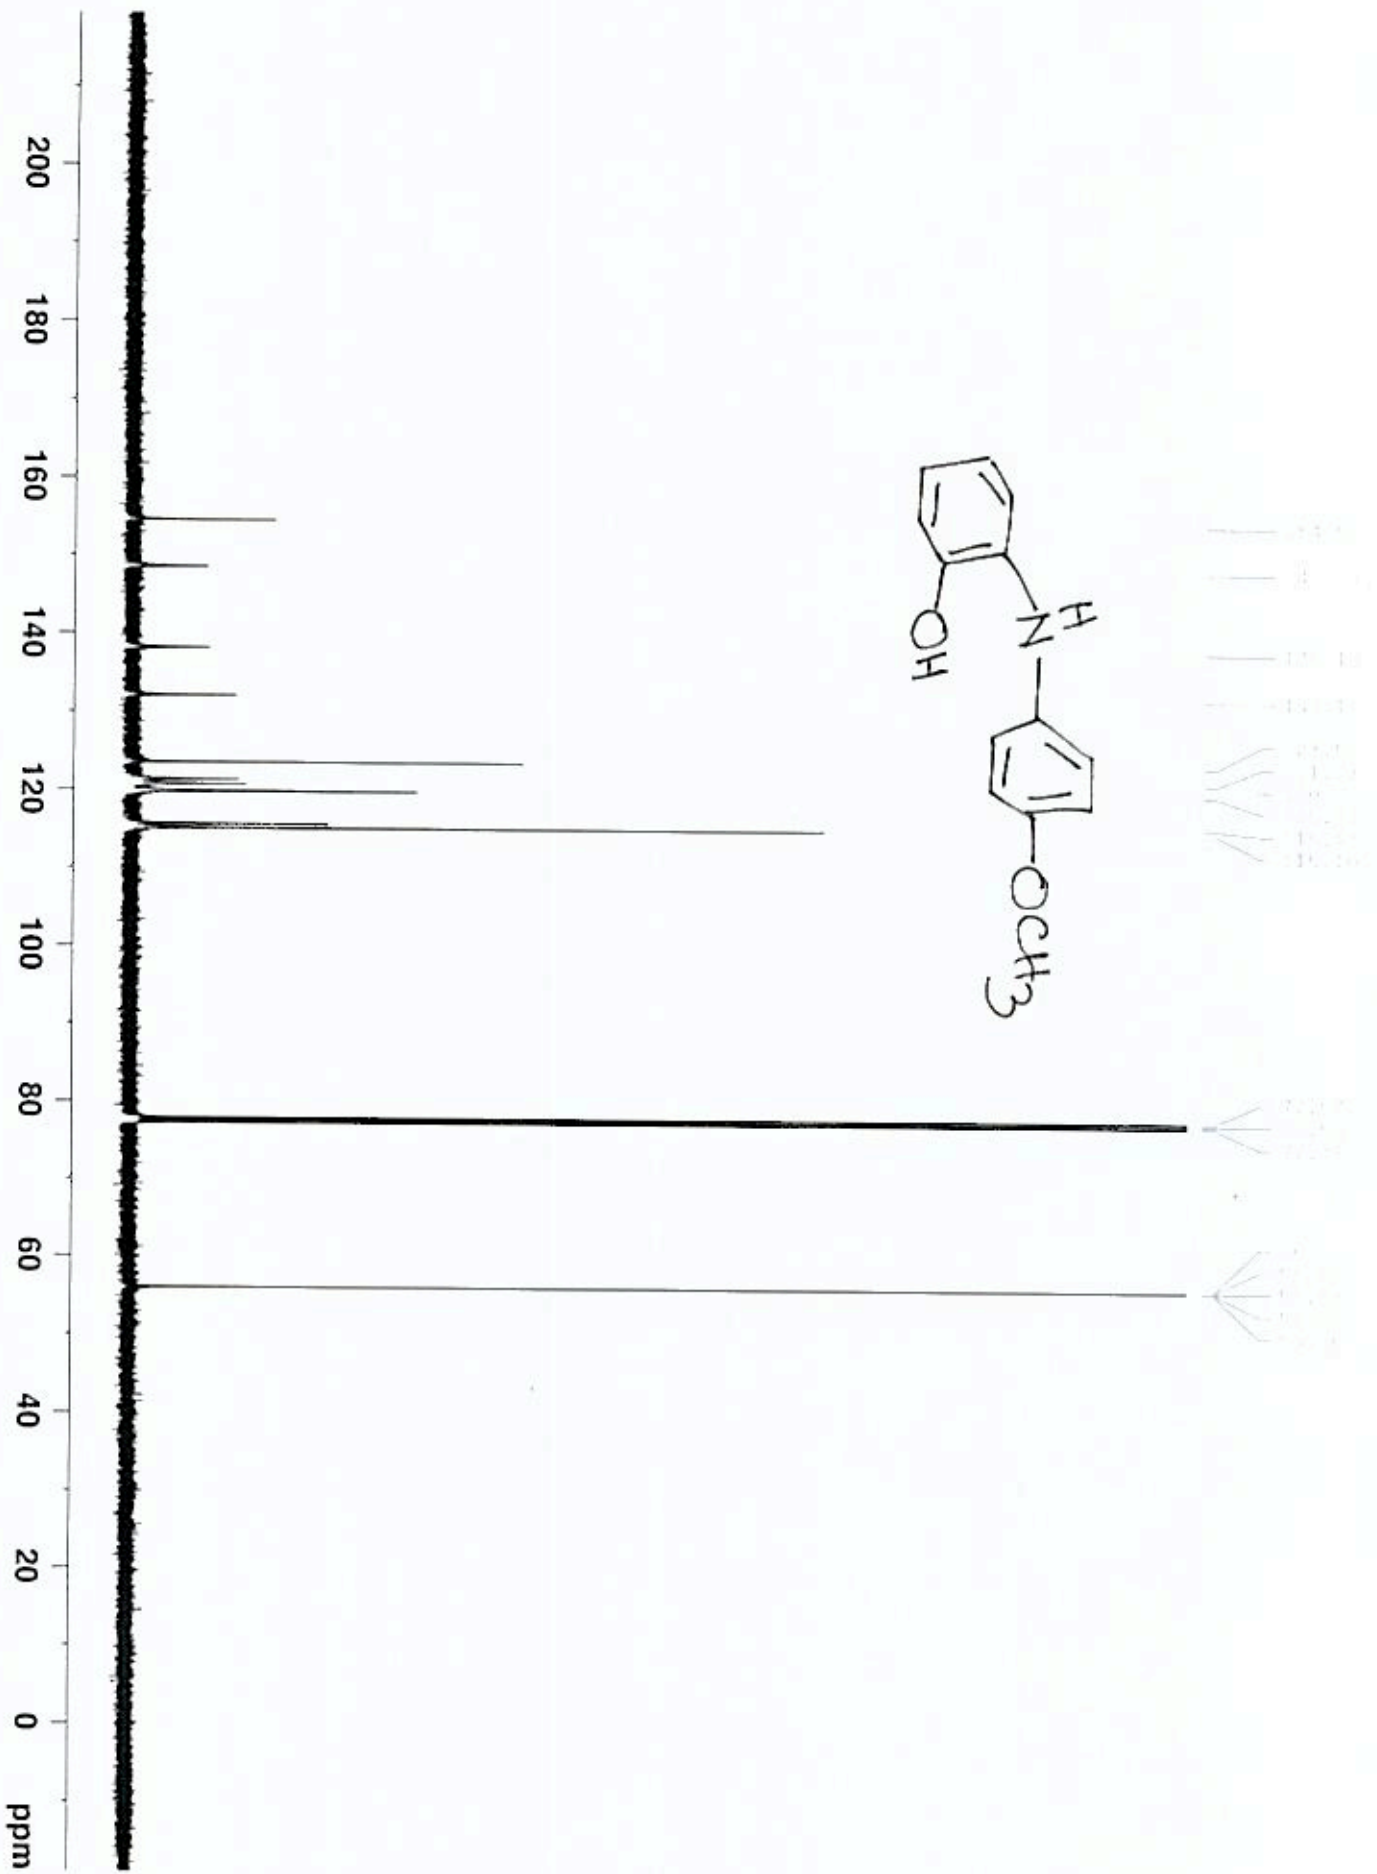



1H-dcif parameter set

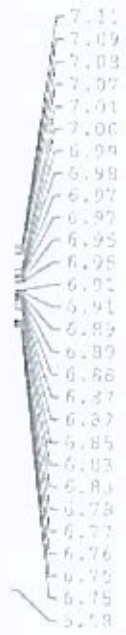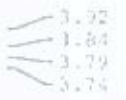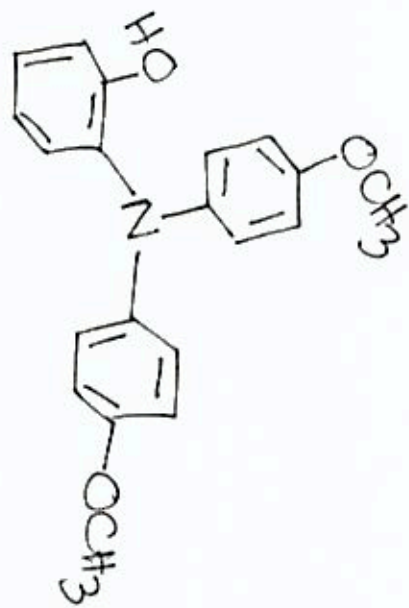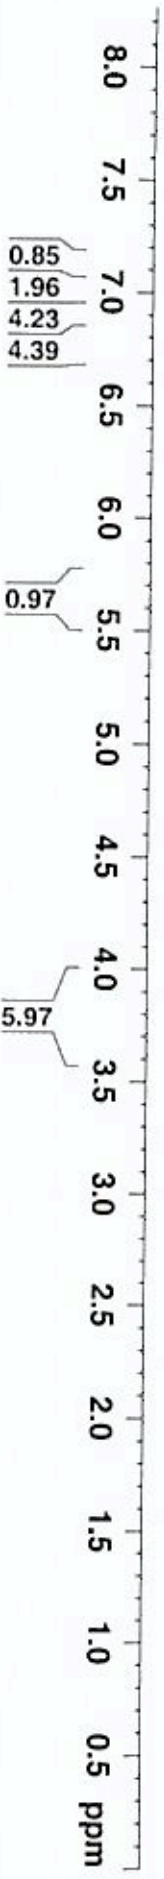

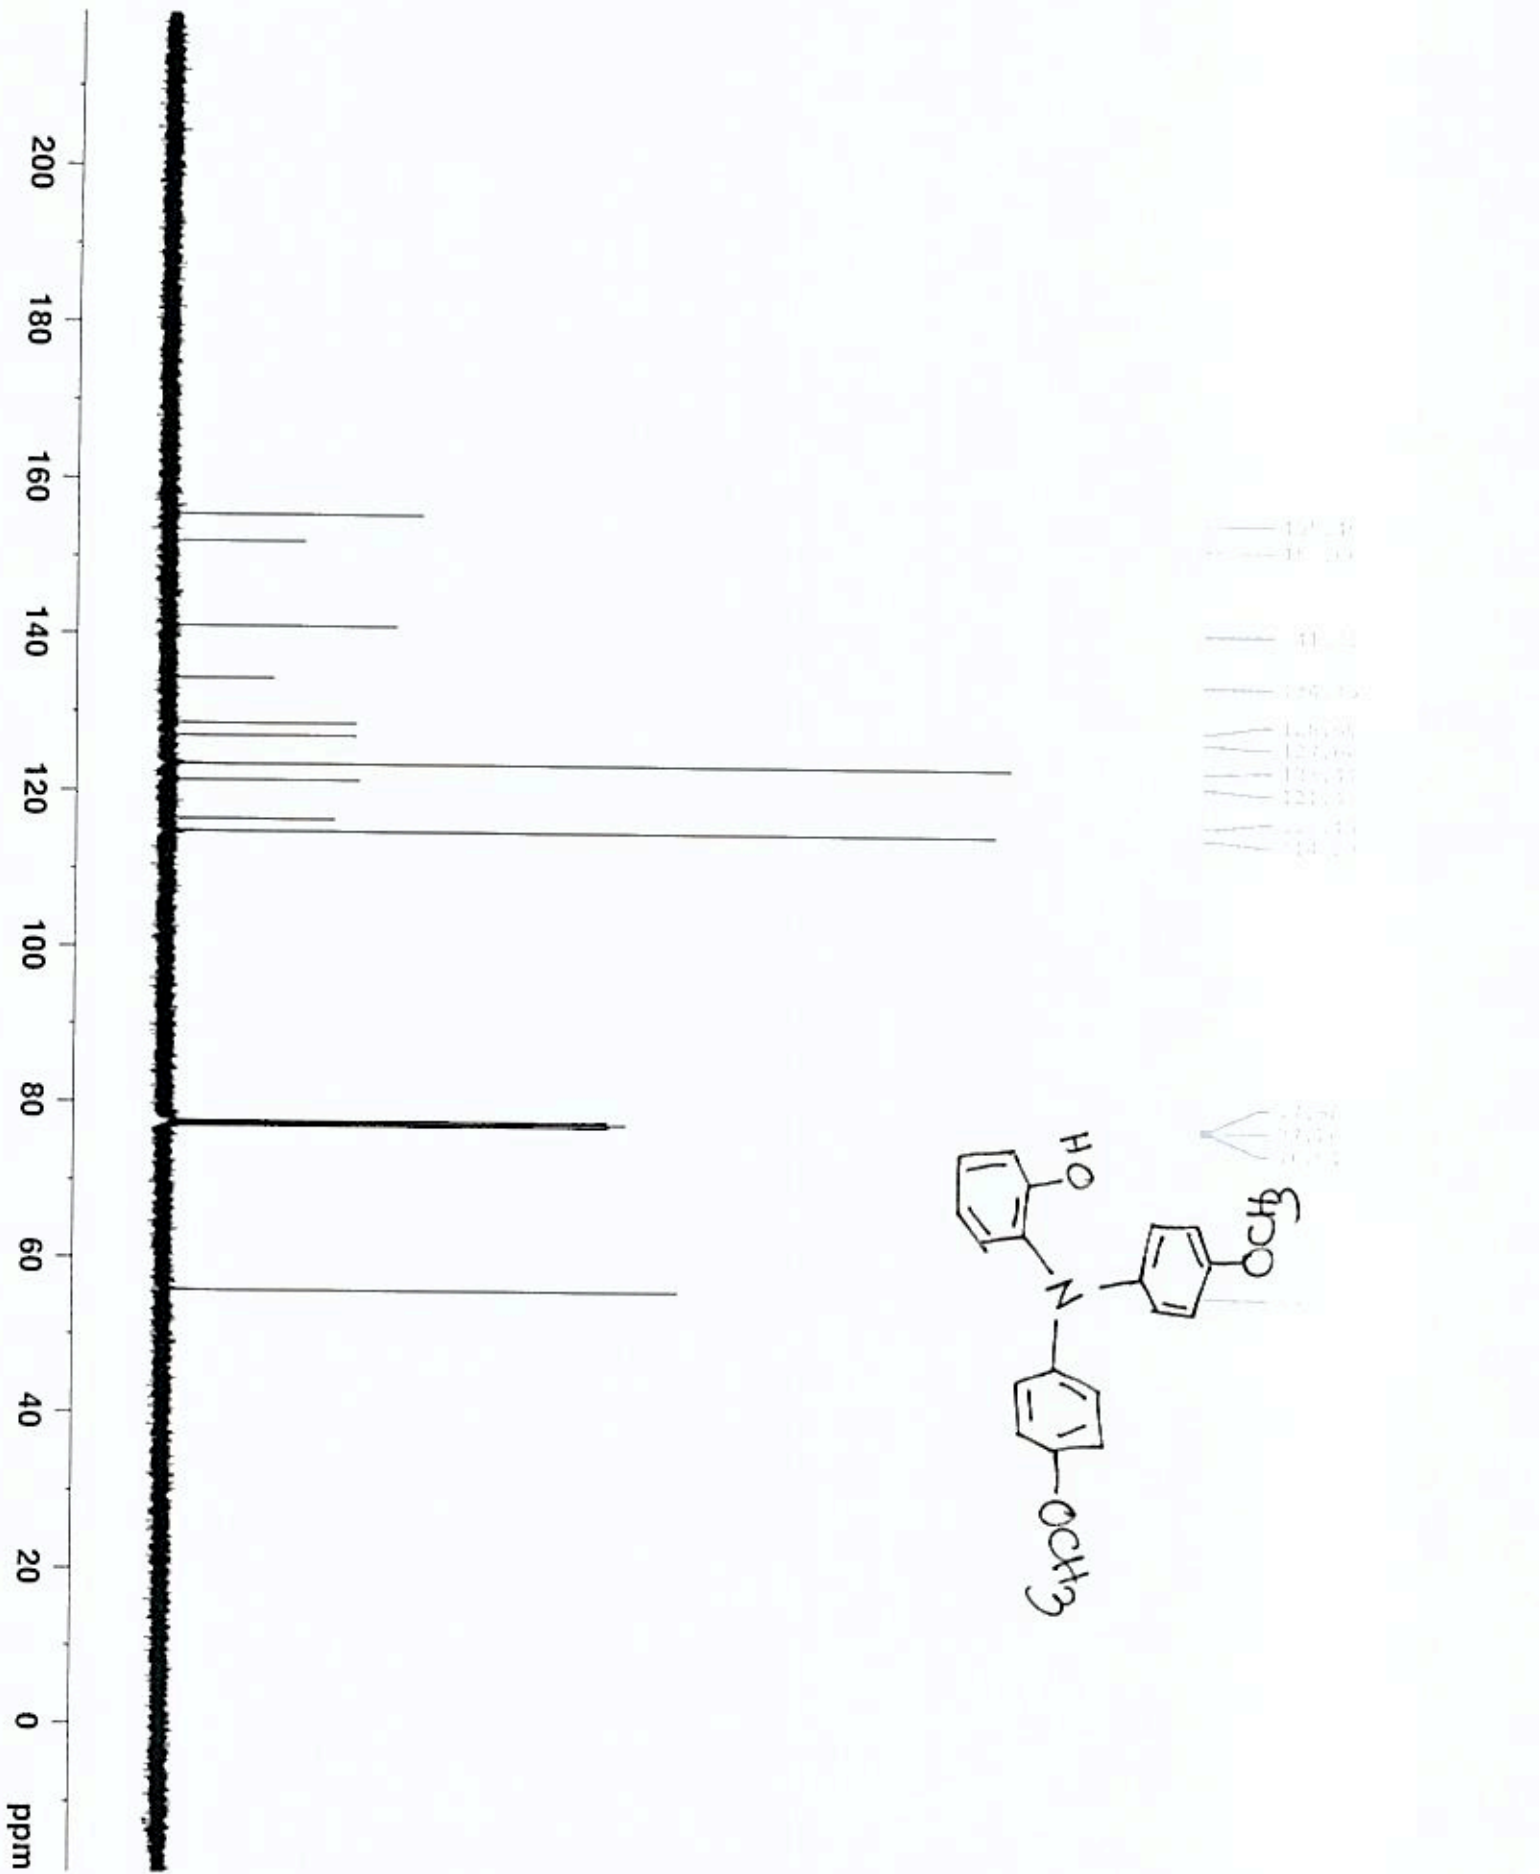

<sup>1</sup>H-dc1f parameter set

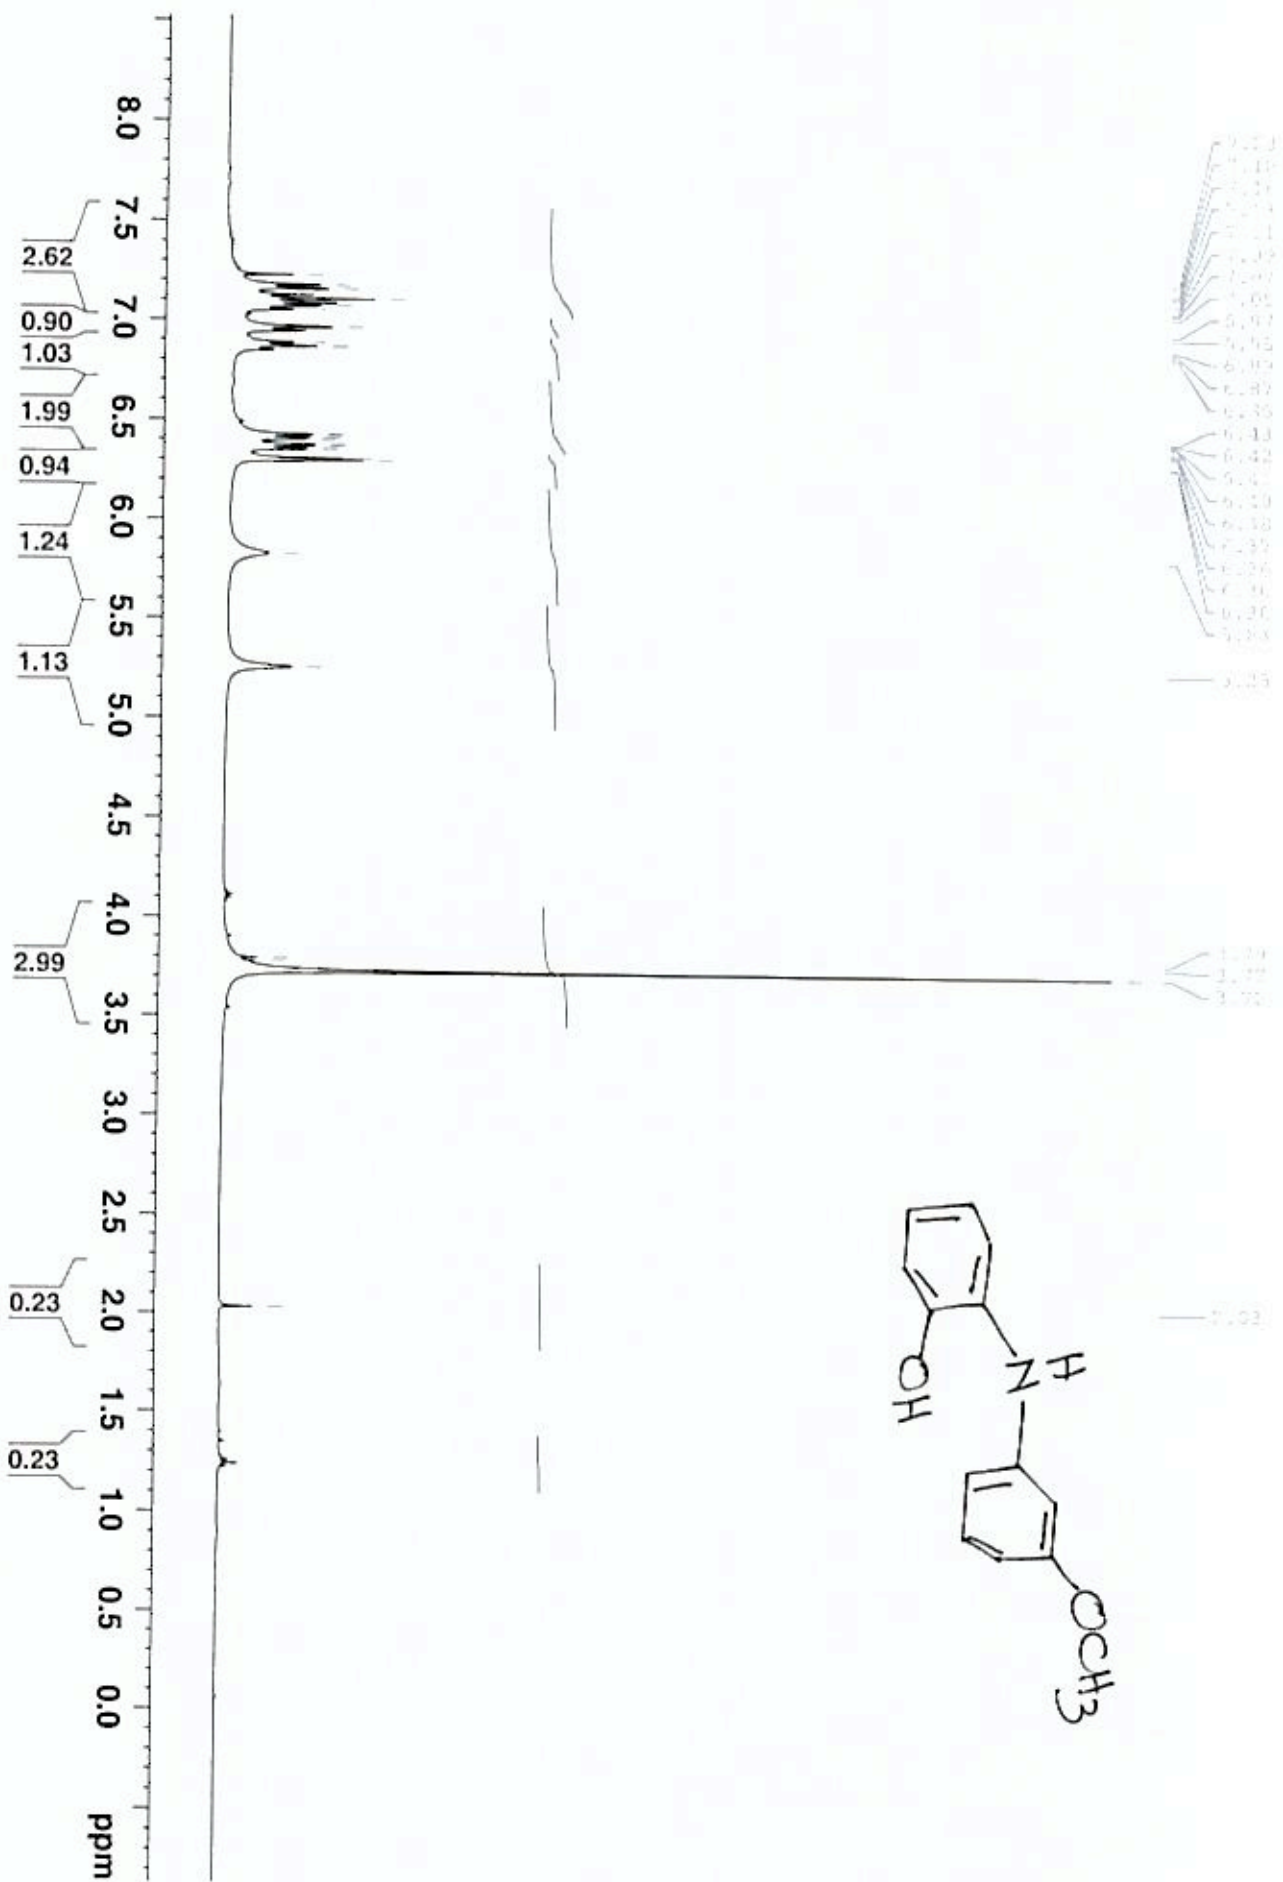

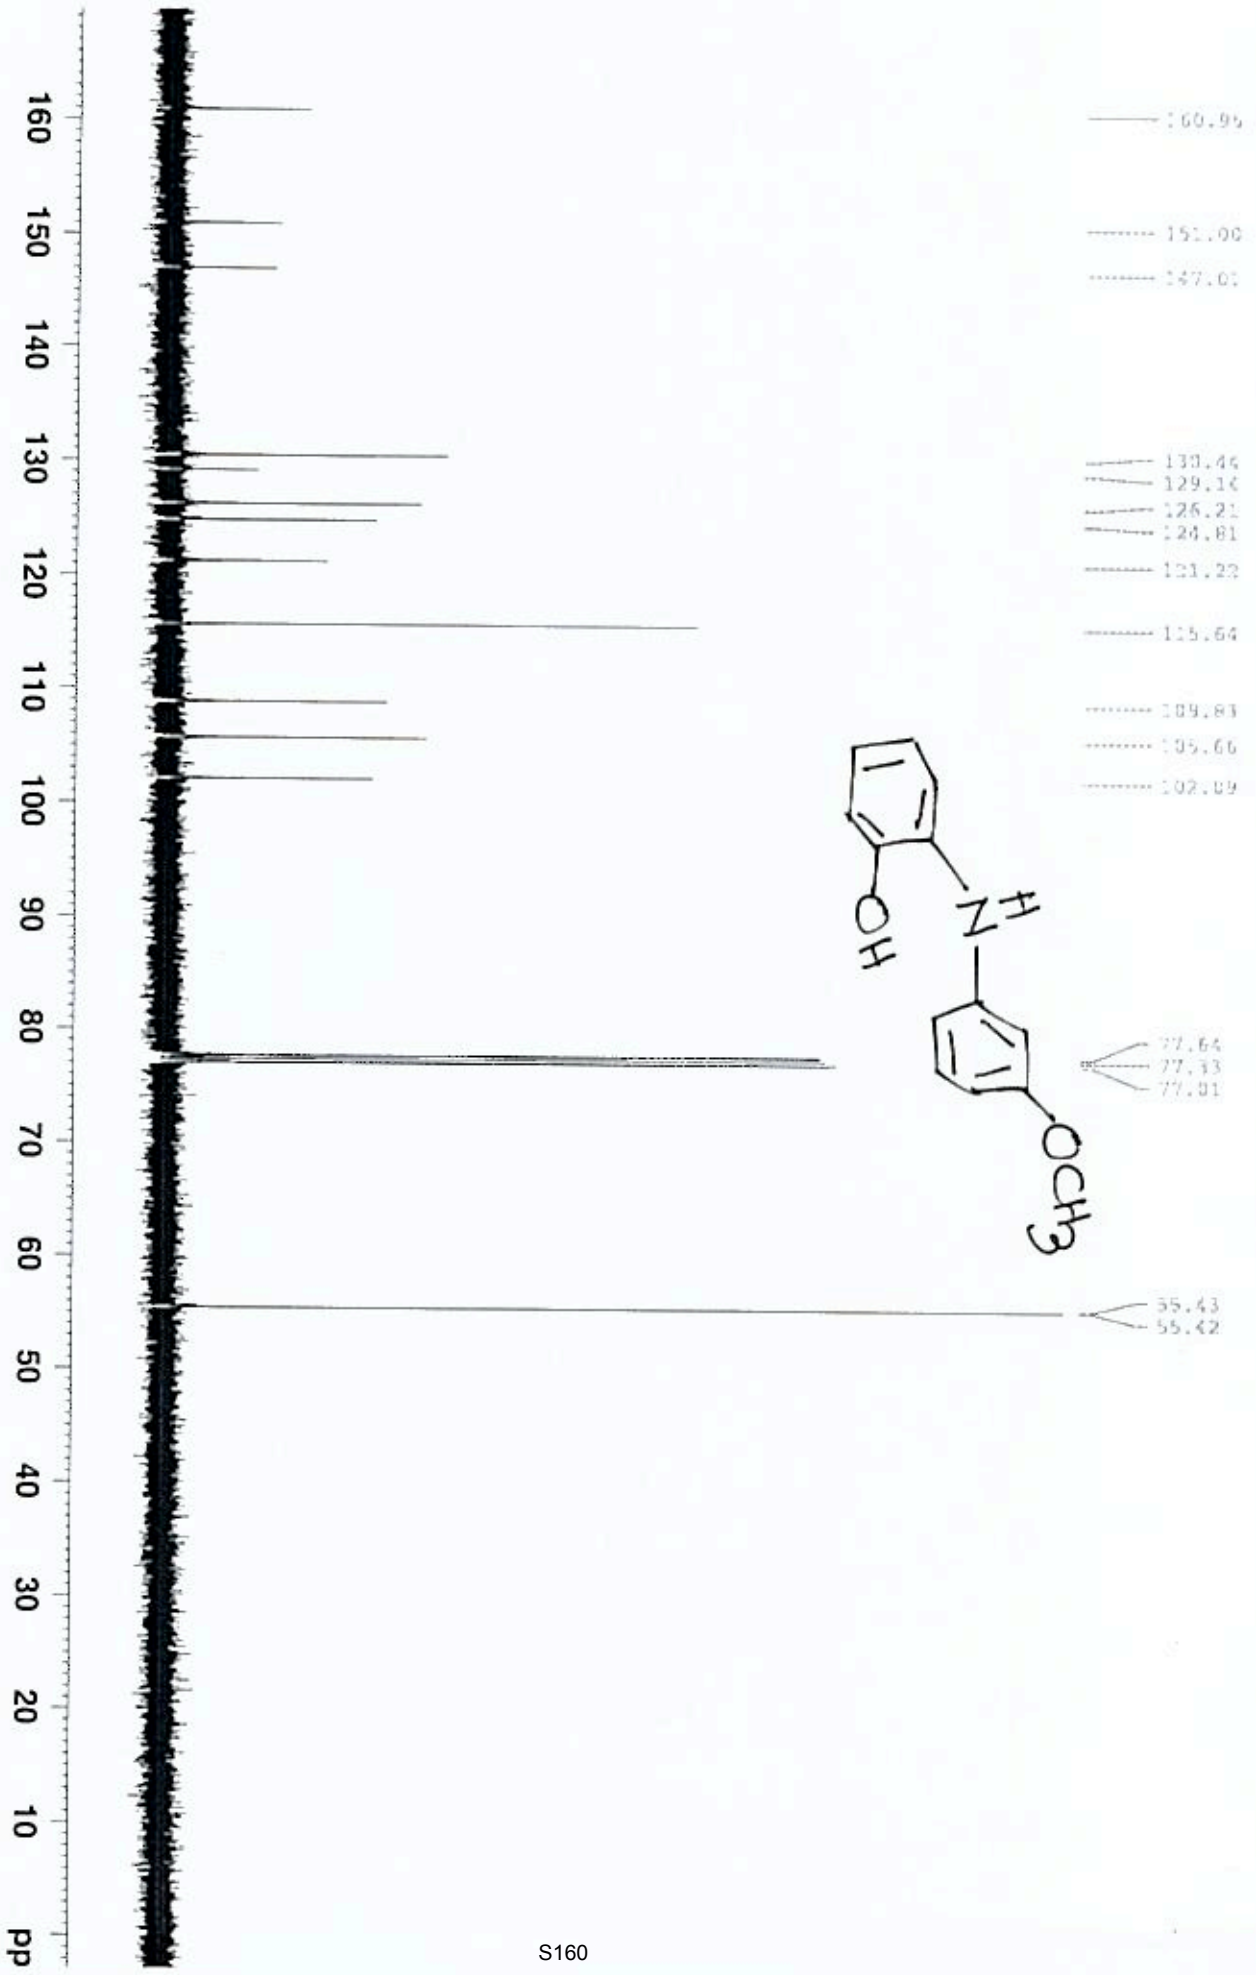

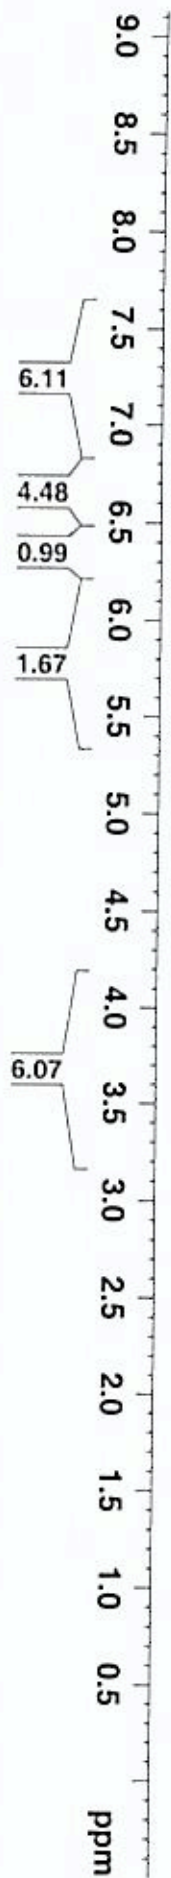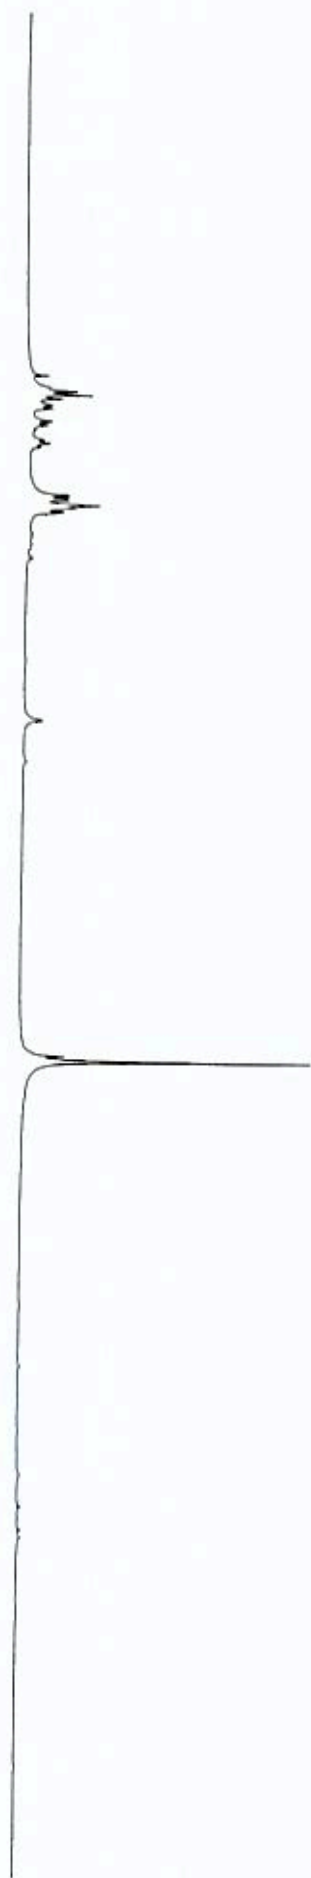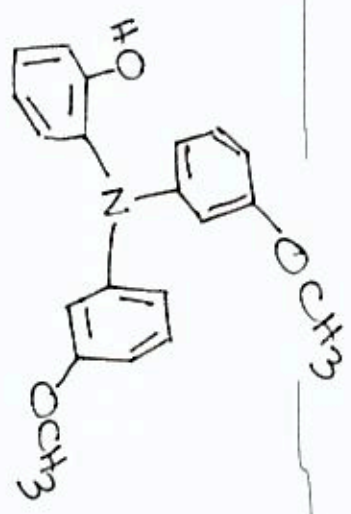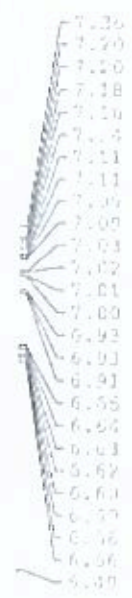

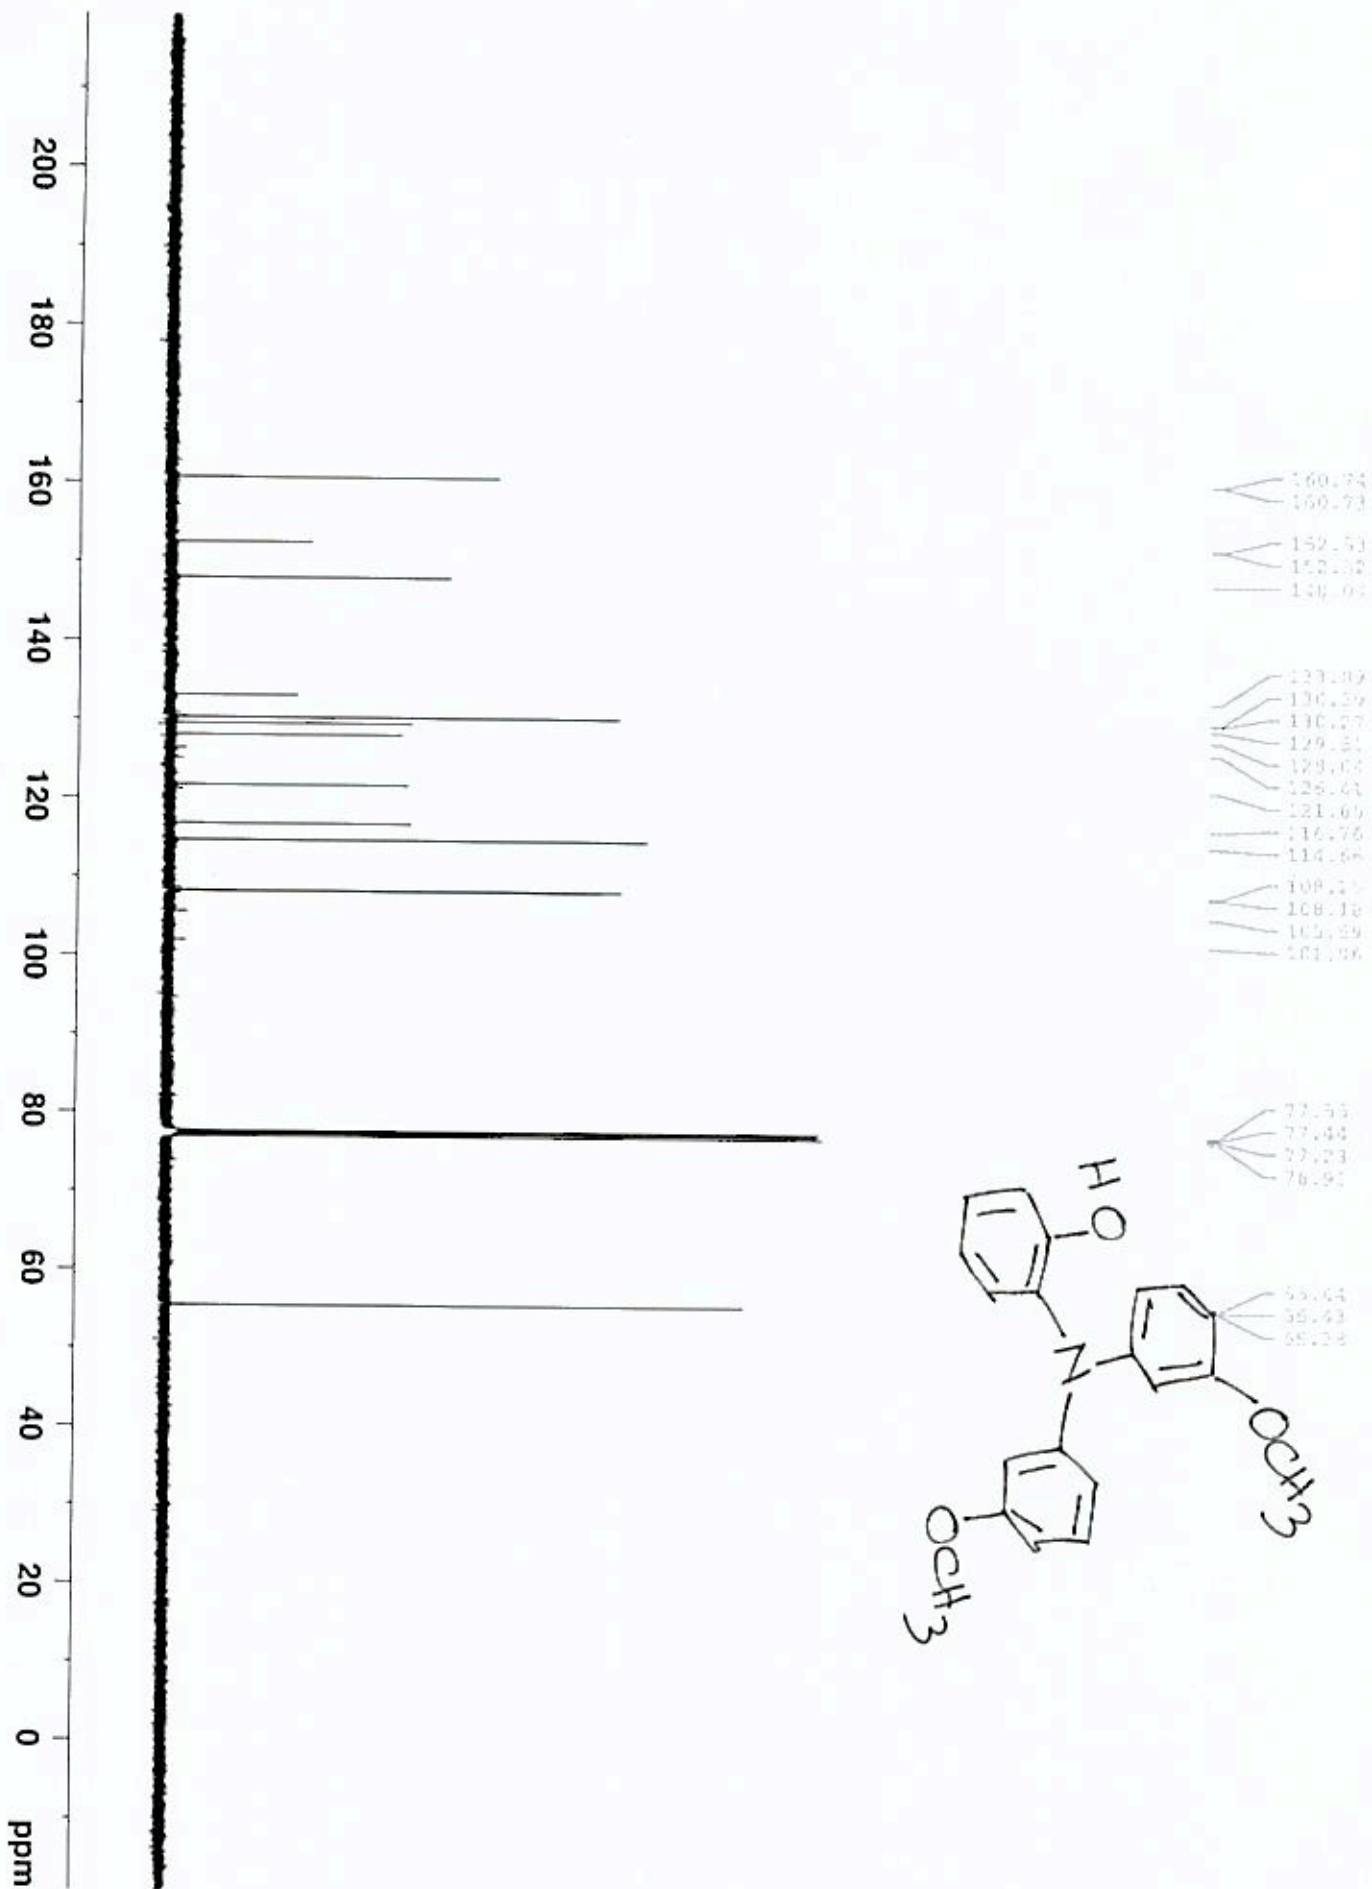

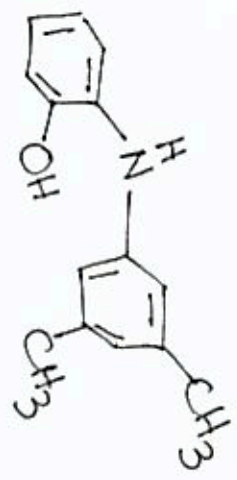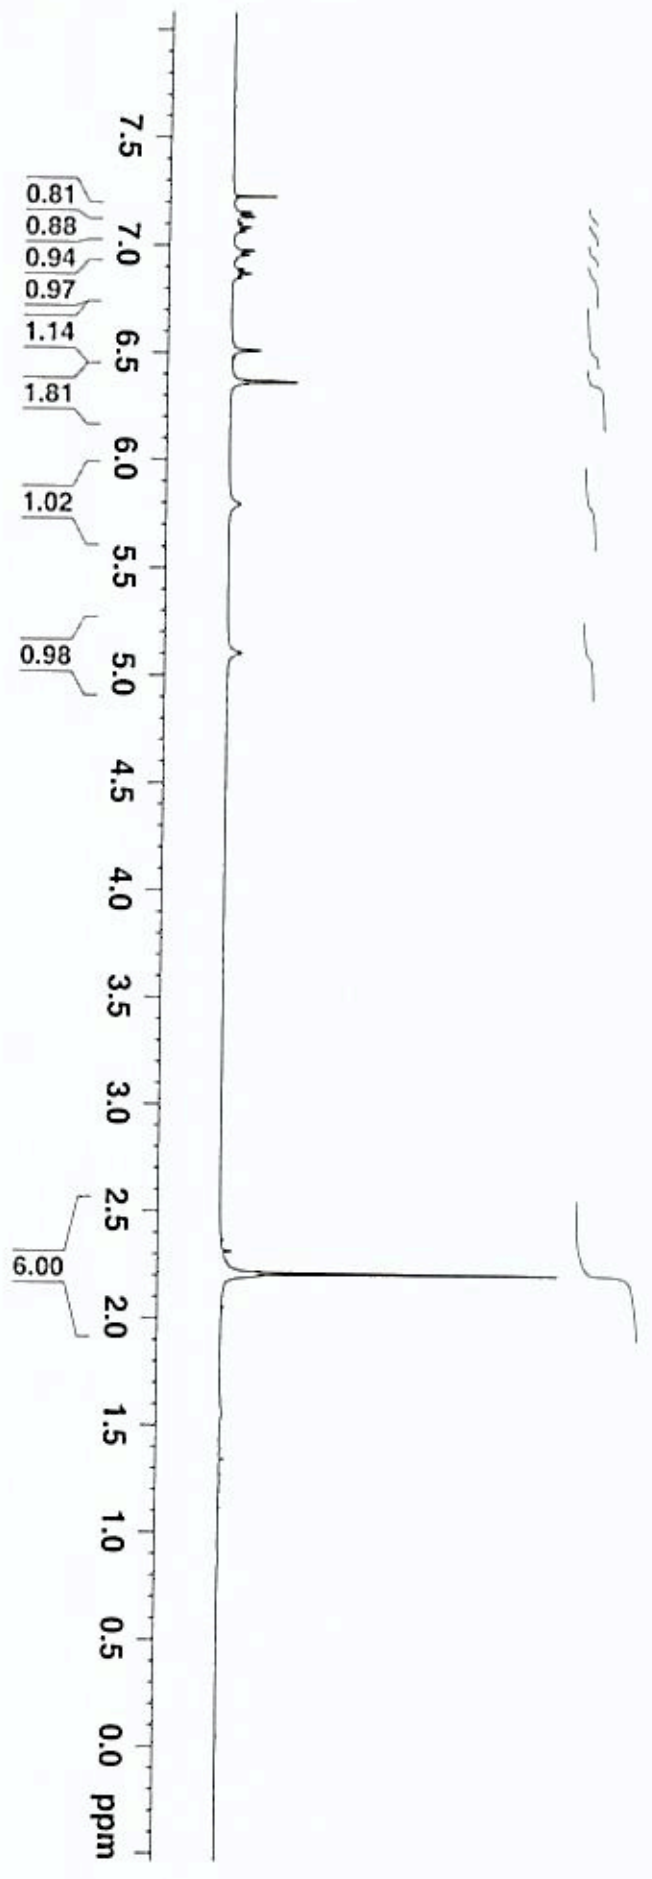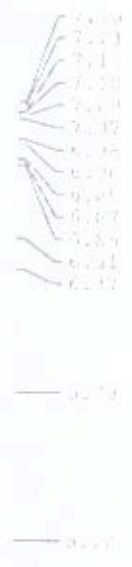



200  
180  
160  
140  
120  
100  
80  
60  
40  
20  
0  
ppm

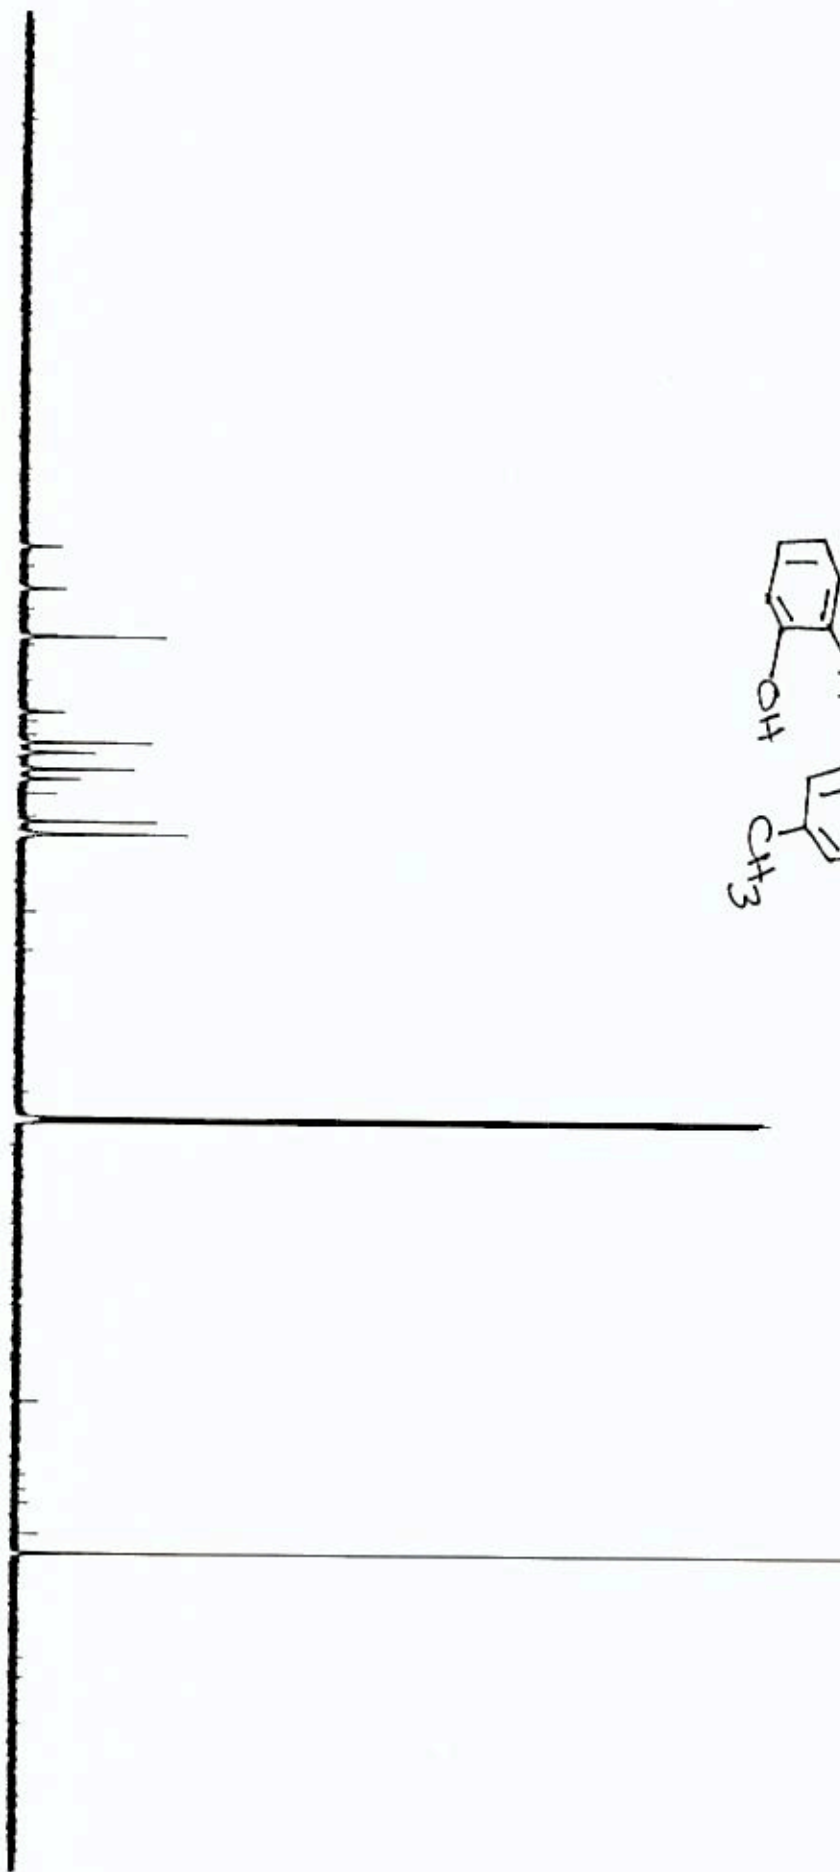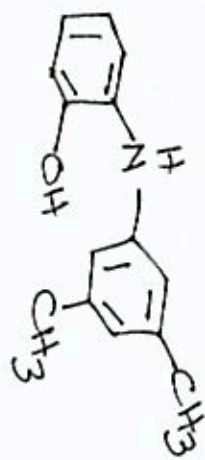

- 150.97
- 148.60
- 139.72
- 139.45
- 129.79
- 127.90
- 124.61
- 122.46
- 121.23
- 119.38
- 115.75
- 114.10
- 77.81
- 77.59
- 77.13
- 21.71
- 21.64



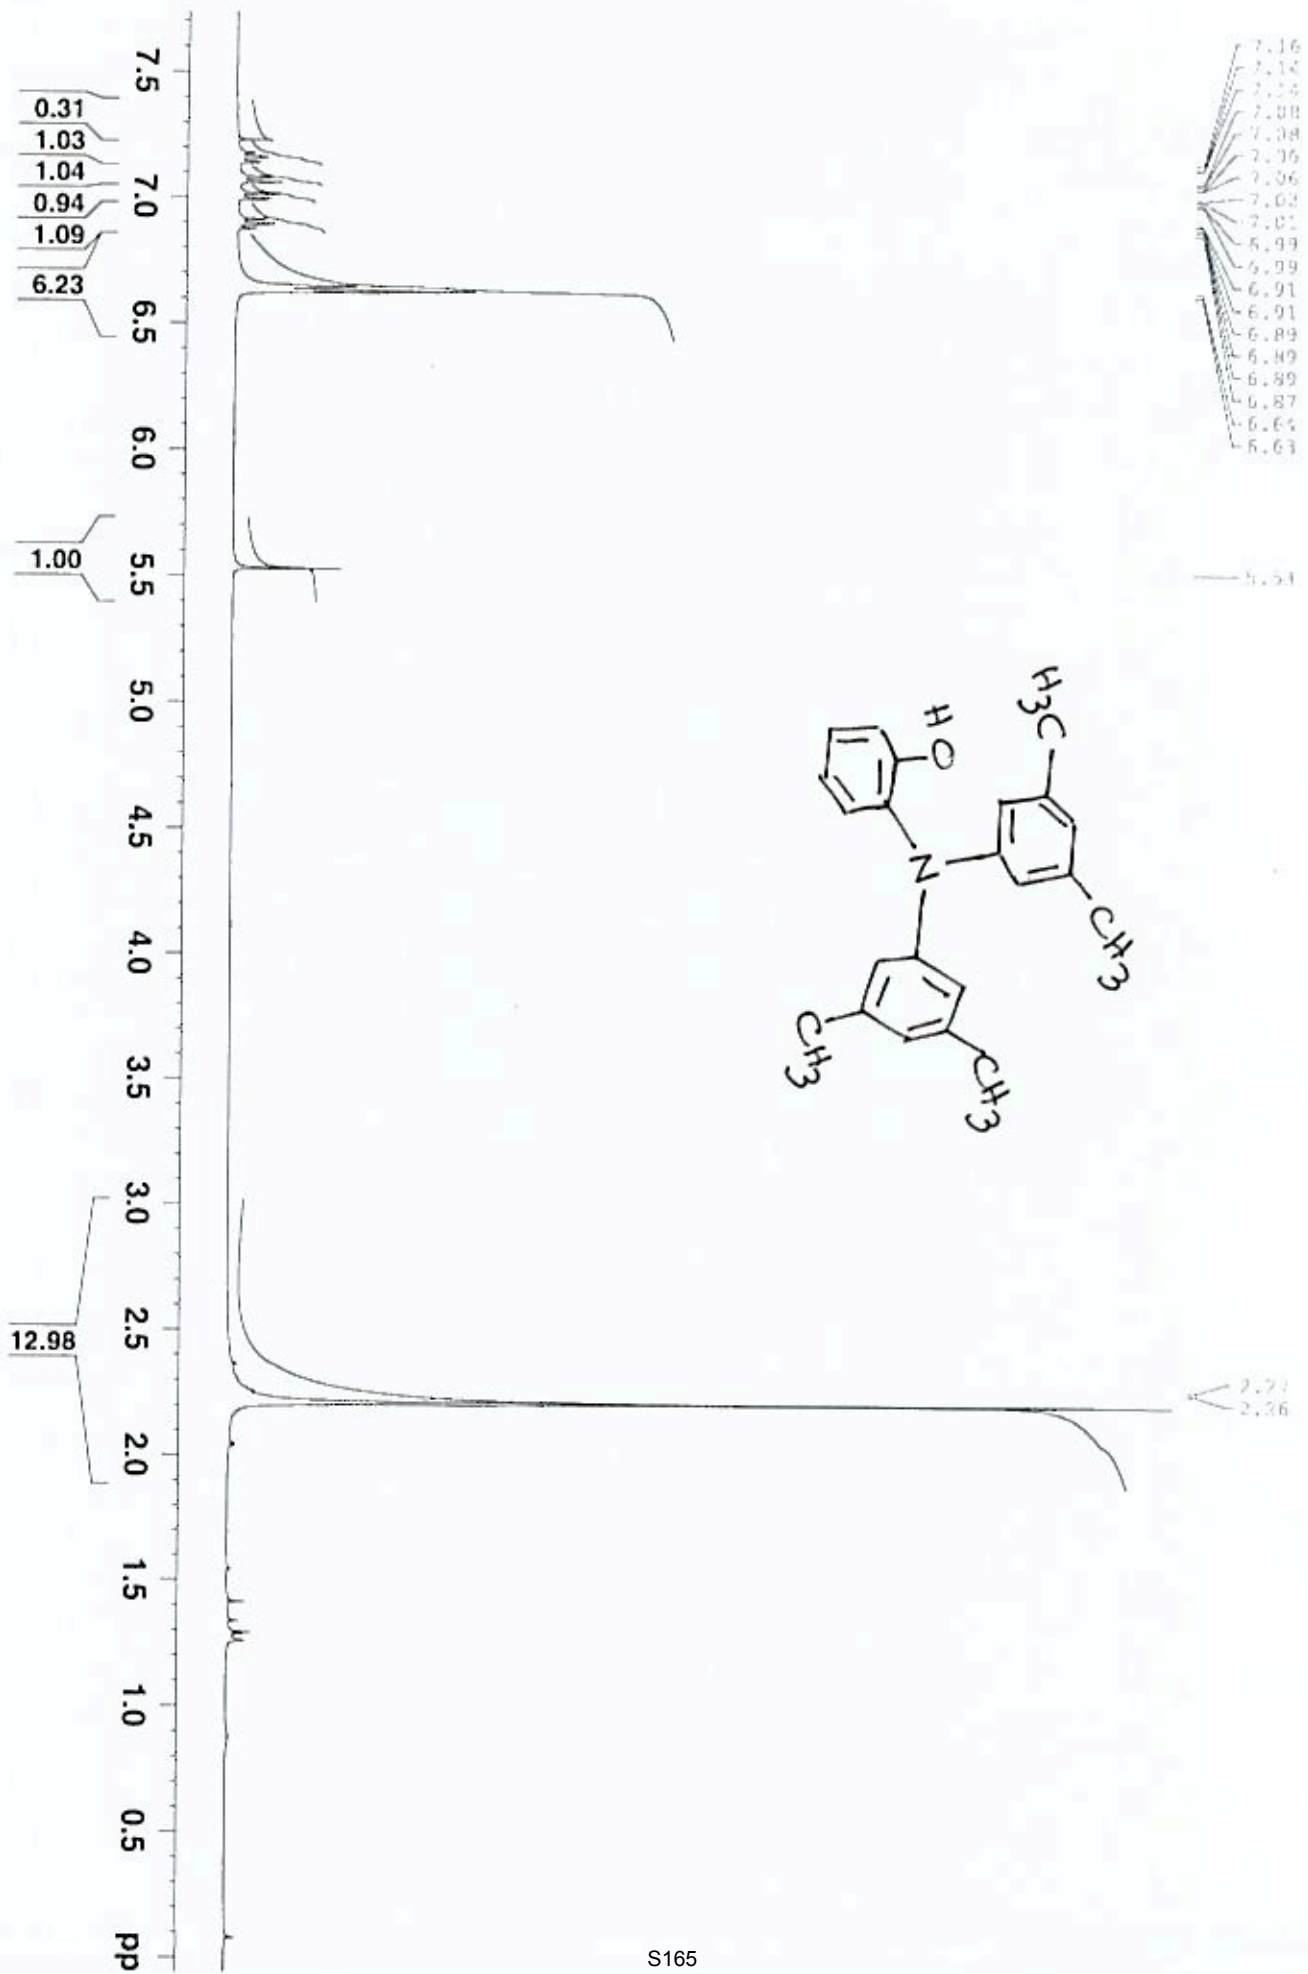

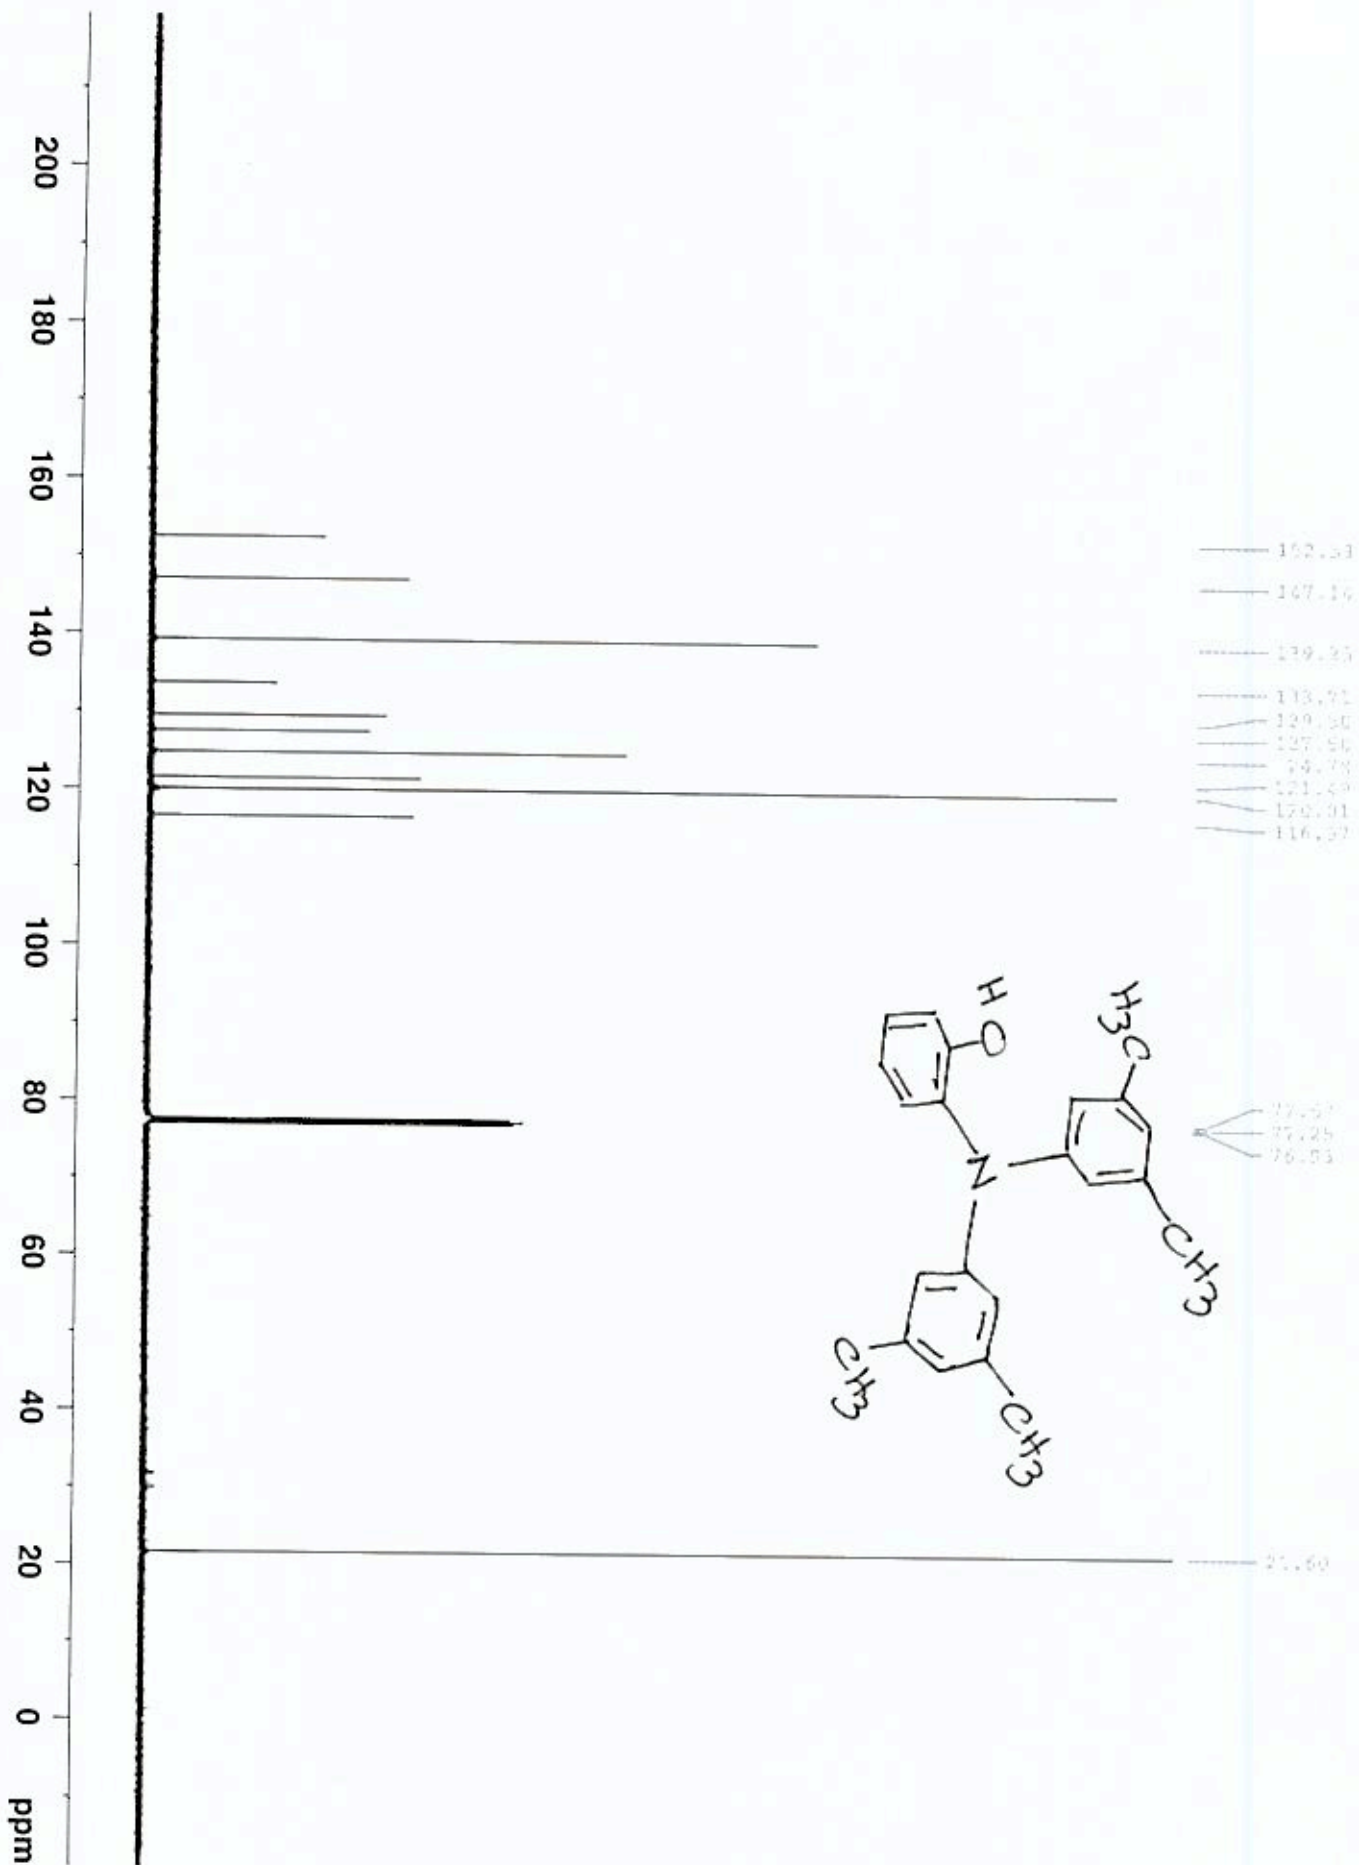

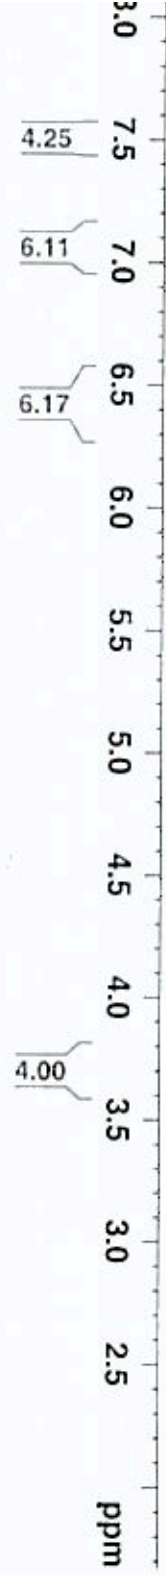

- 7.53
- 7.47
- 7.47
- 7.30
- 7.28
- 7.13
- 7.11
- 7.10
- 7.06
- 7.06
- 7.03
- 6.48
- 6.42
- 6.41
- 6.33
- 6.31

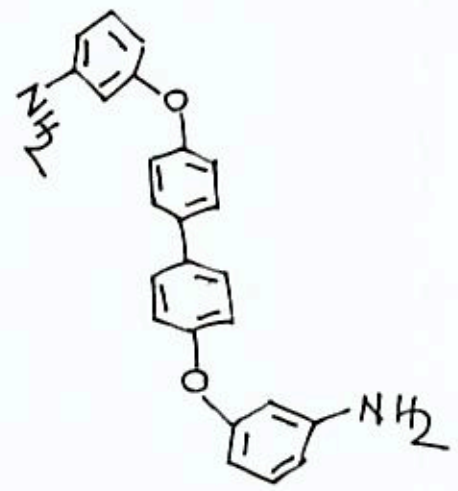

3.49

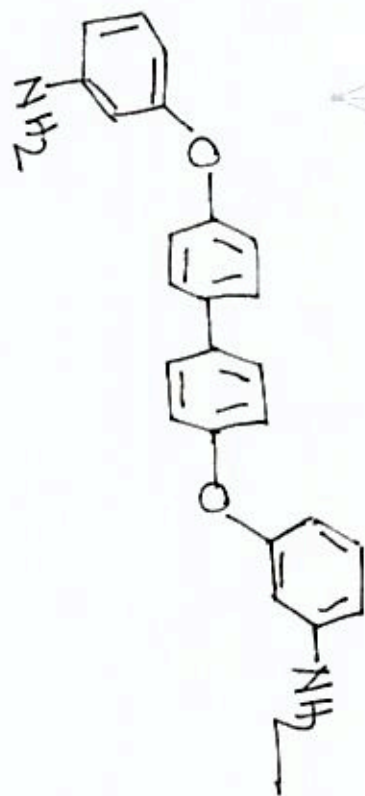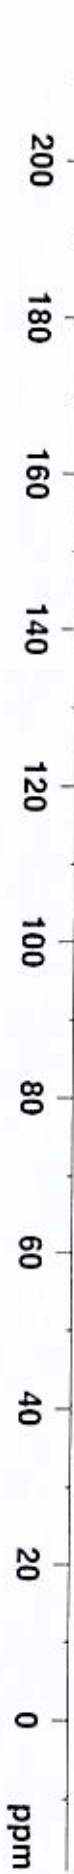

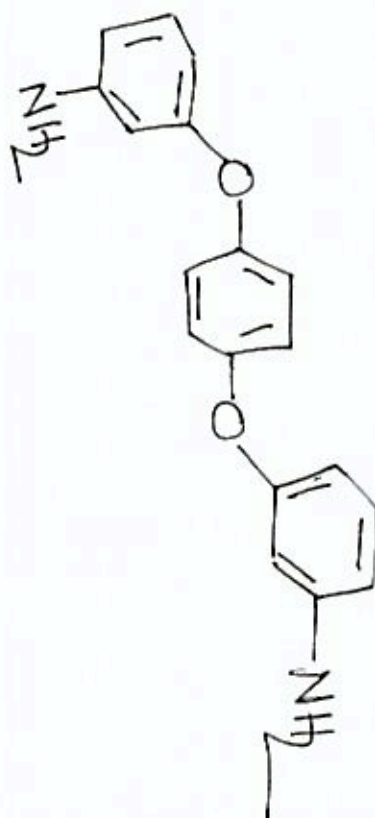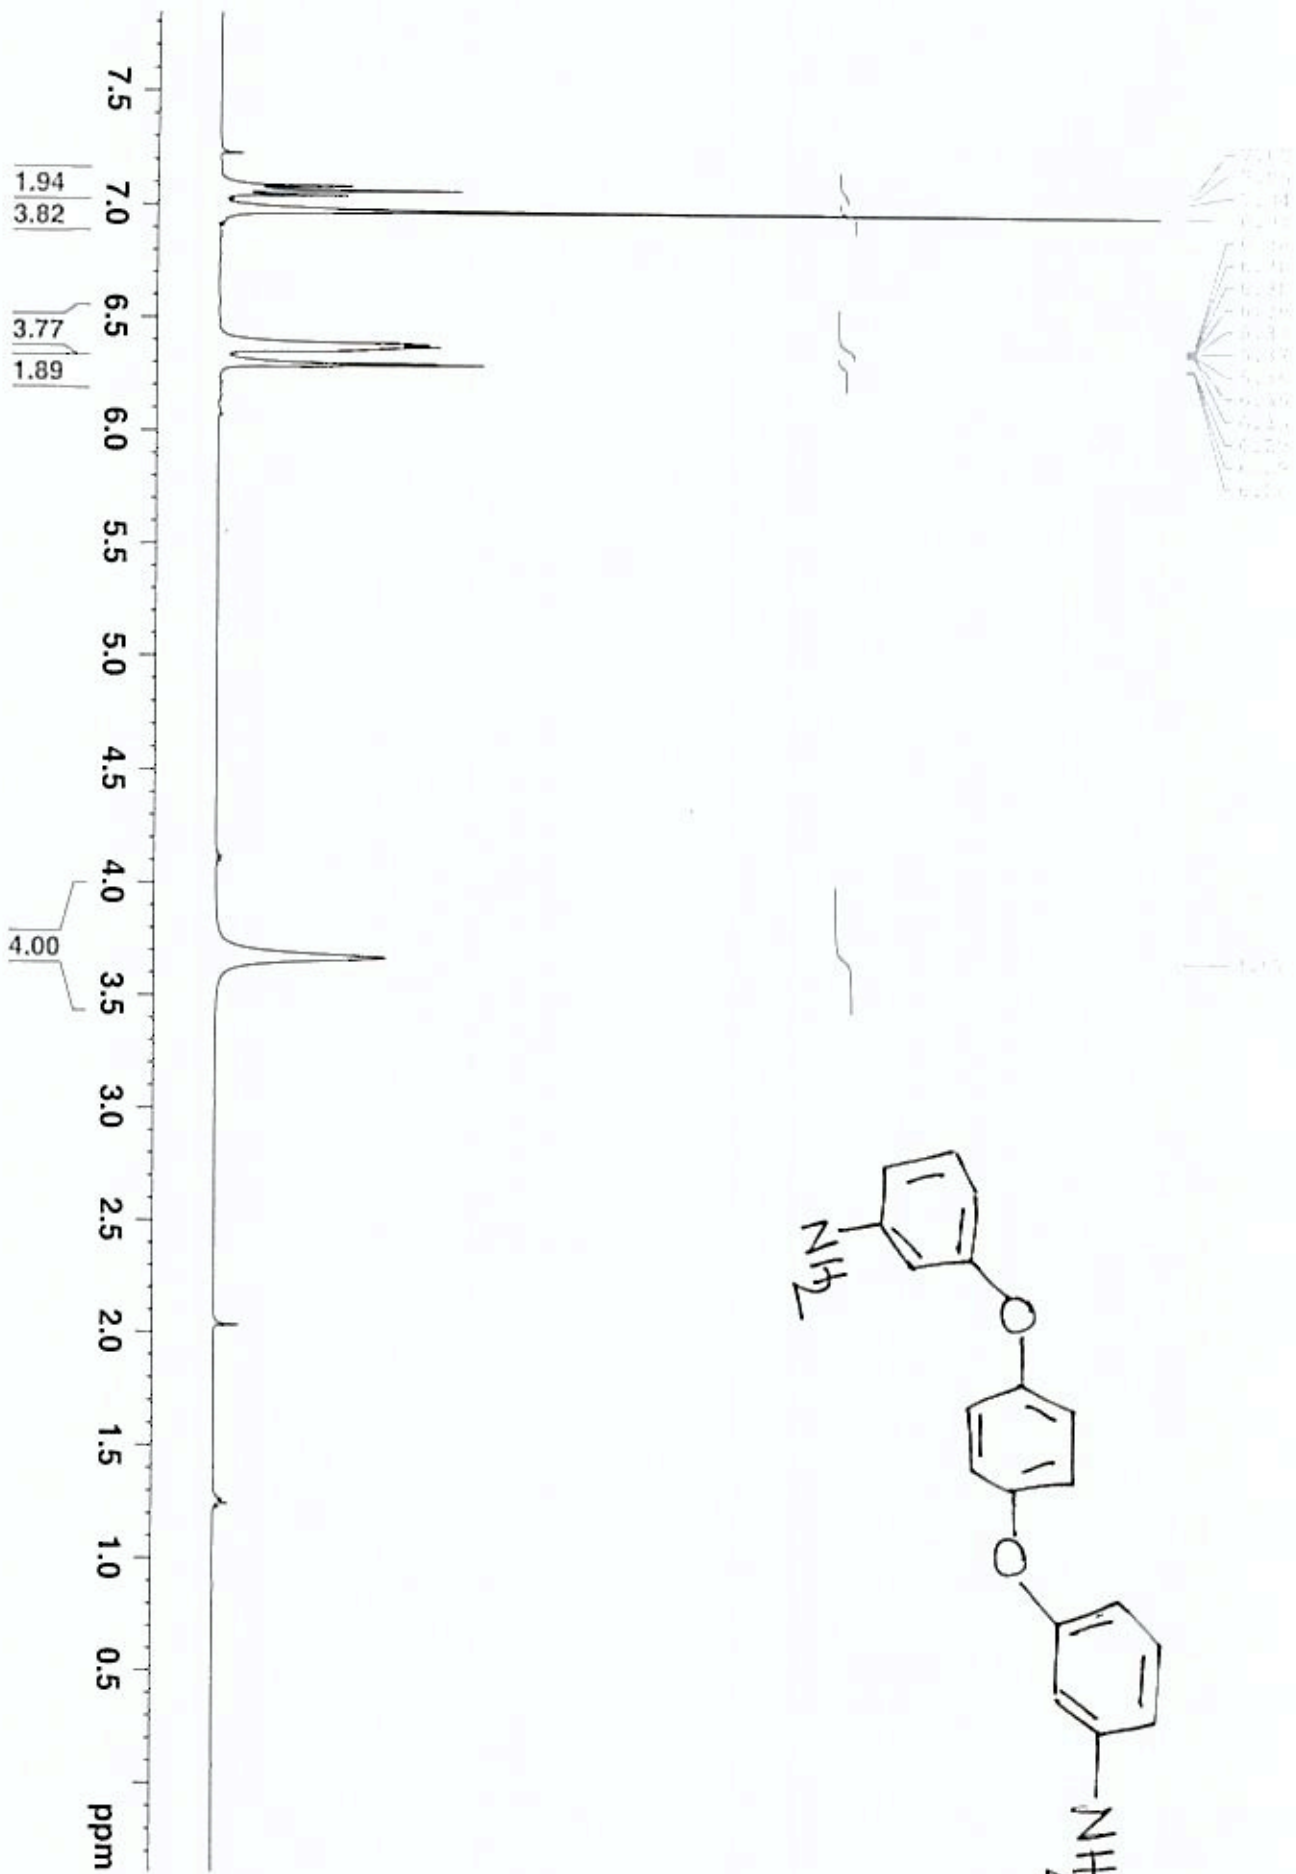

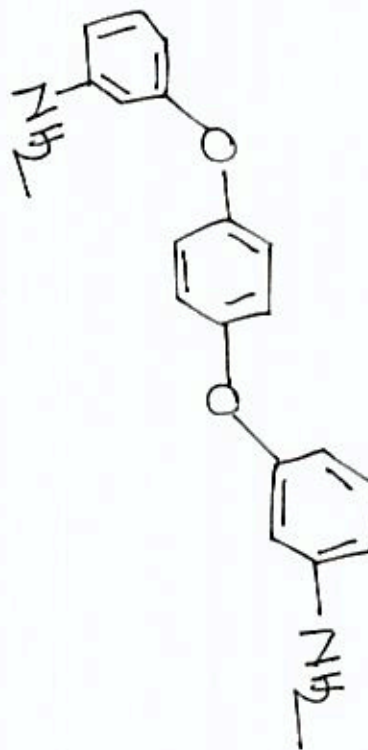

- 150.00
- 148.00
- 147.00
- 132.00
- 115.00
- 113.00
- 105.00
- 103.00

- 7.50
- 7.40
- 7.30

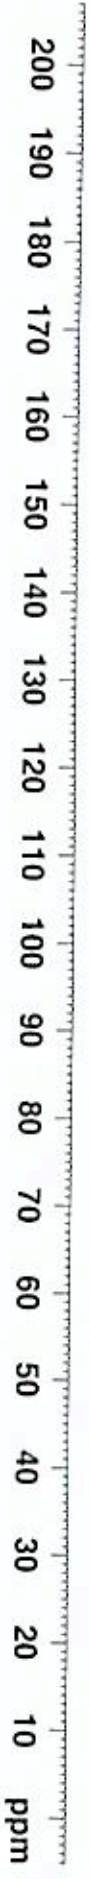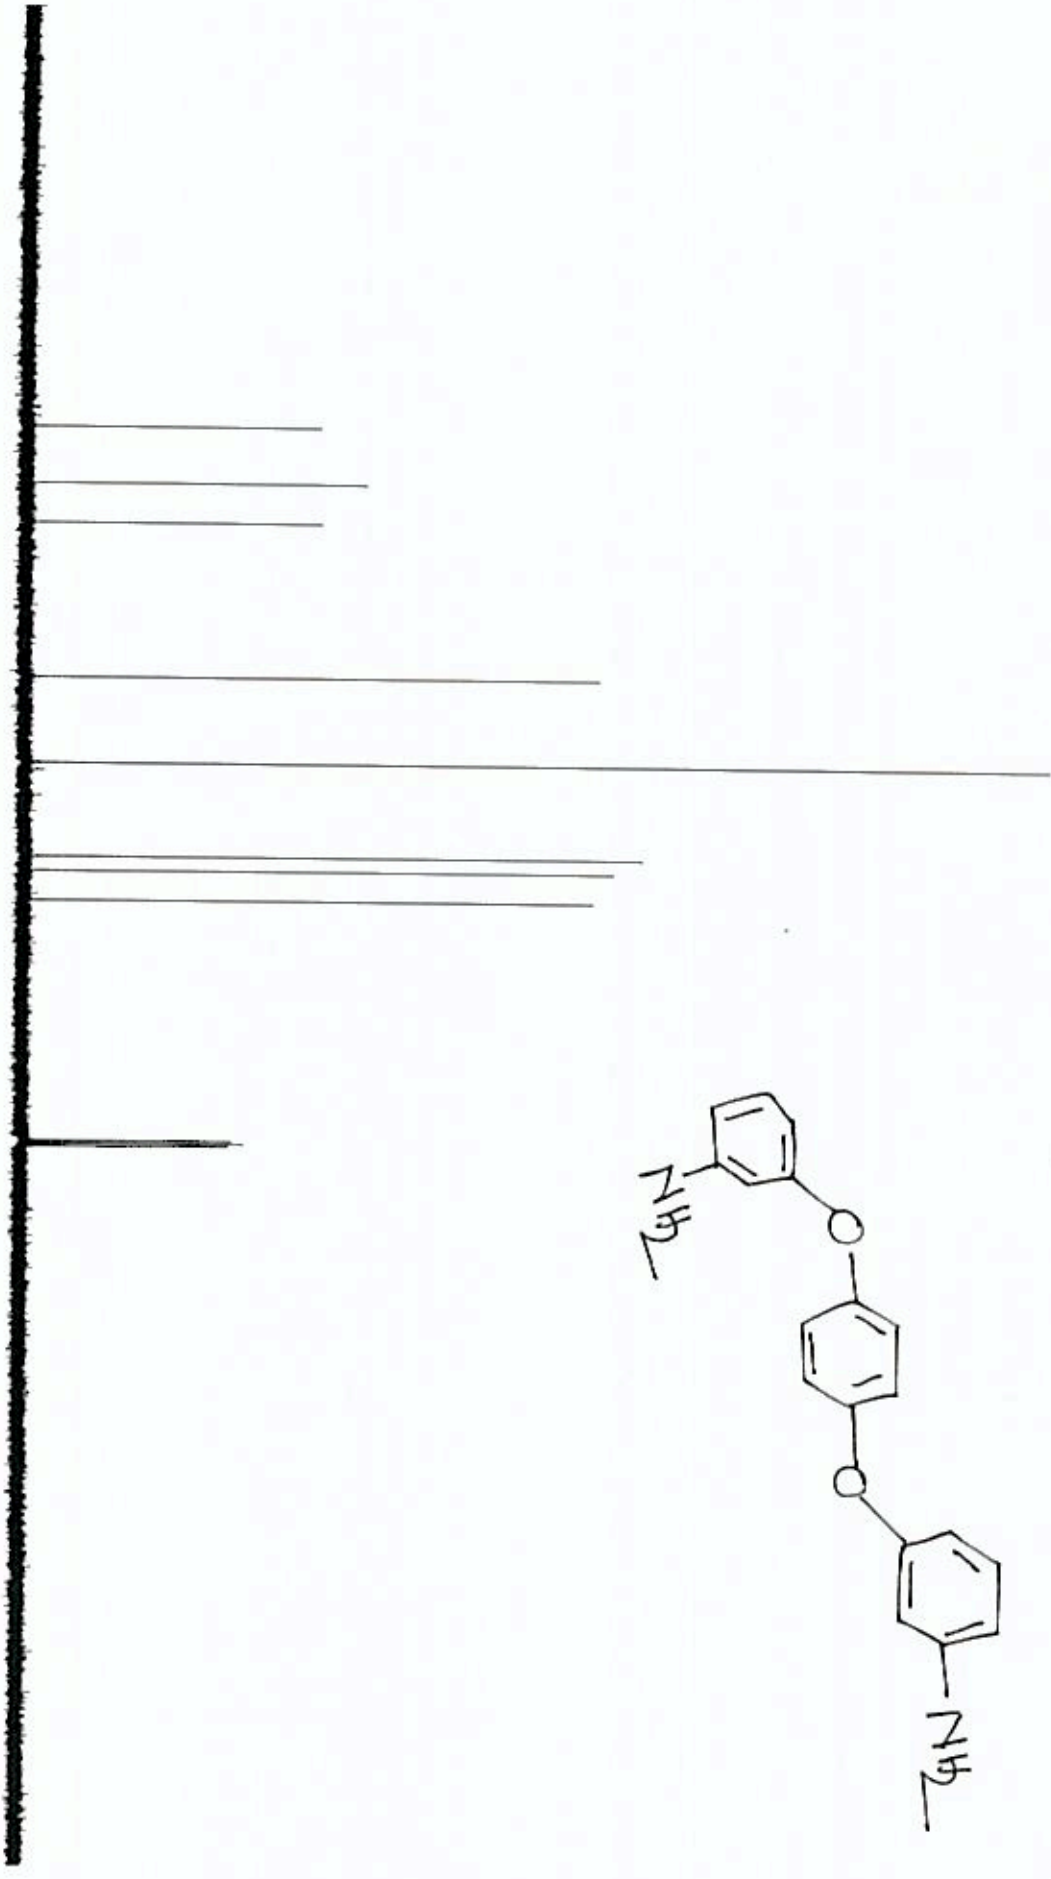

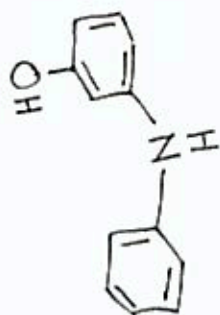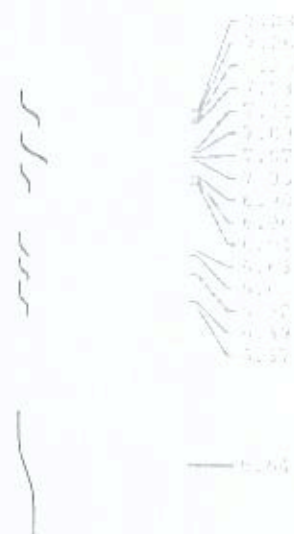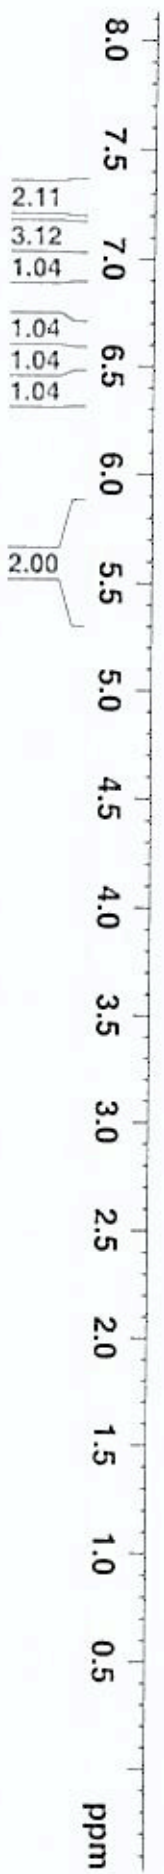





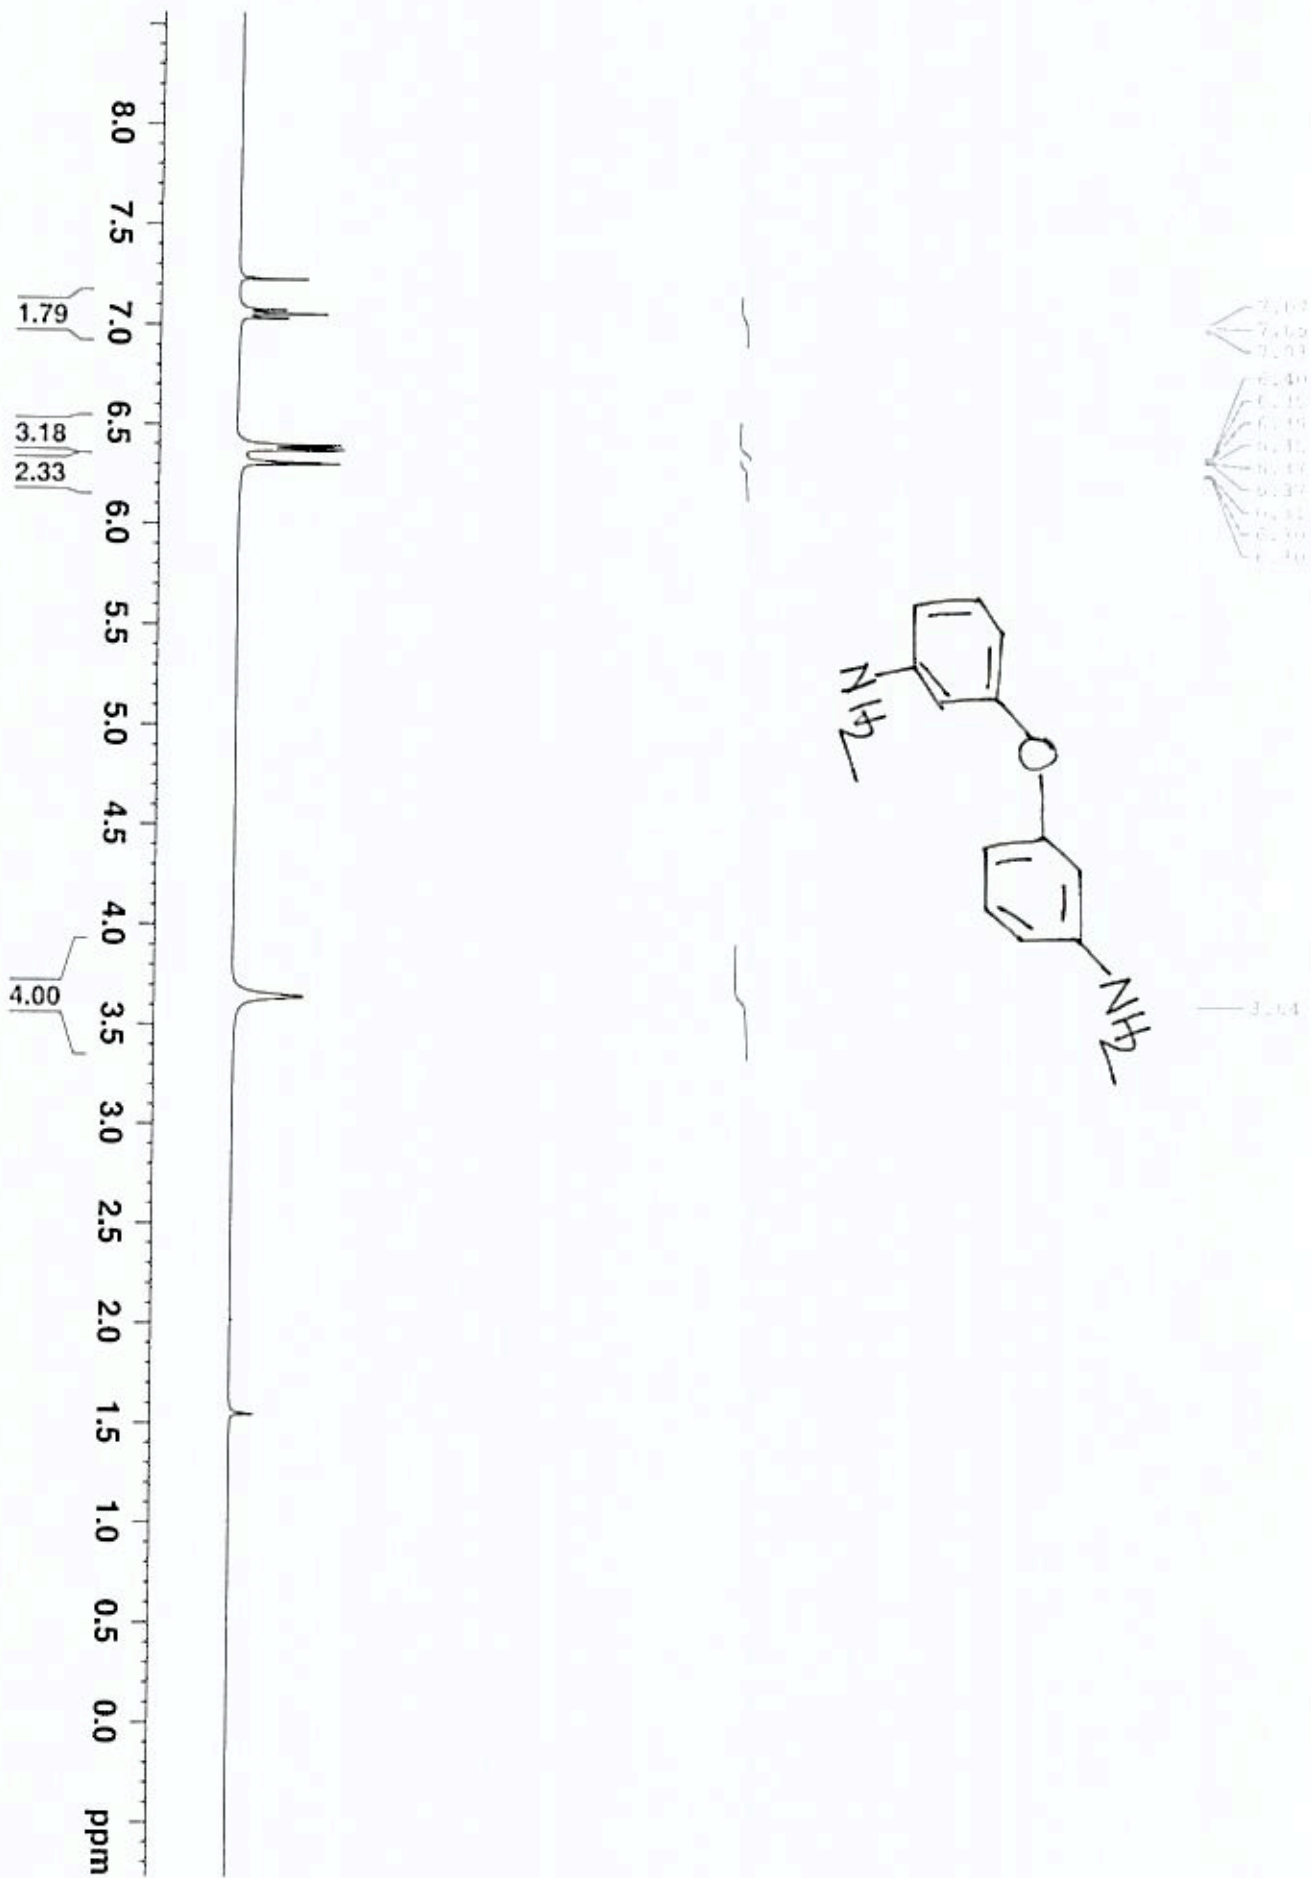

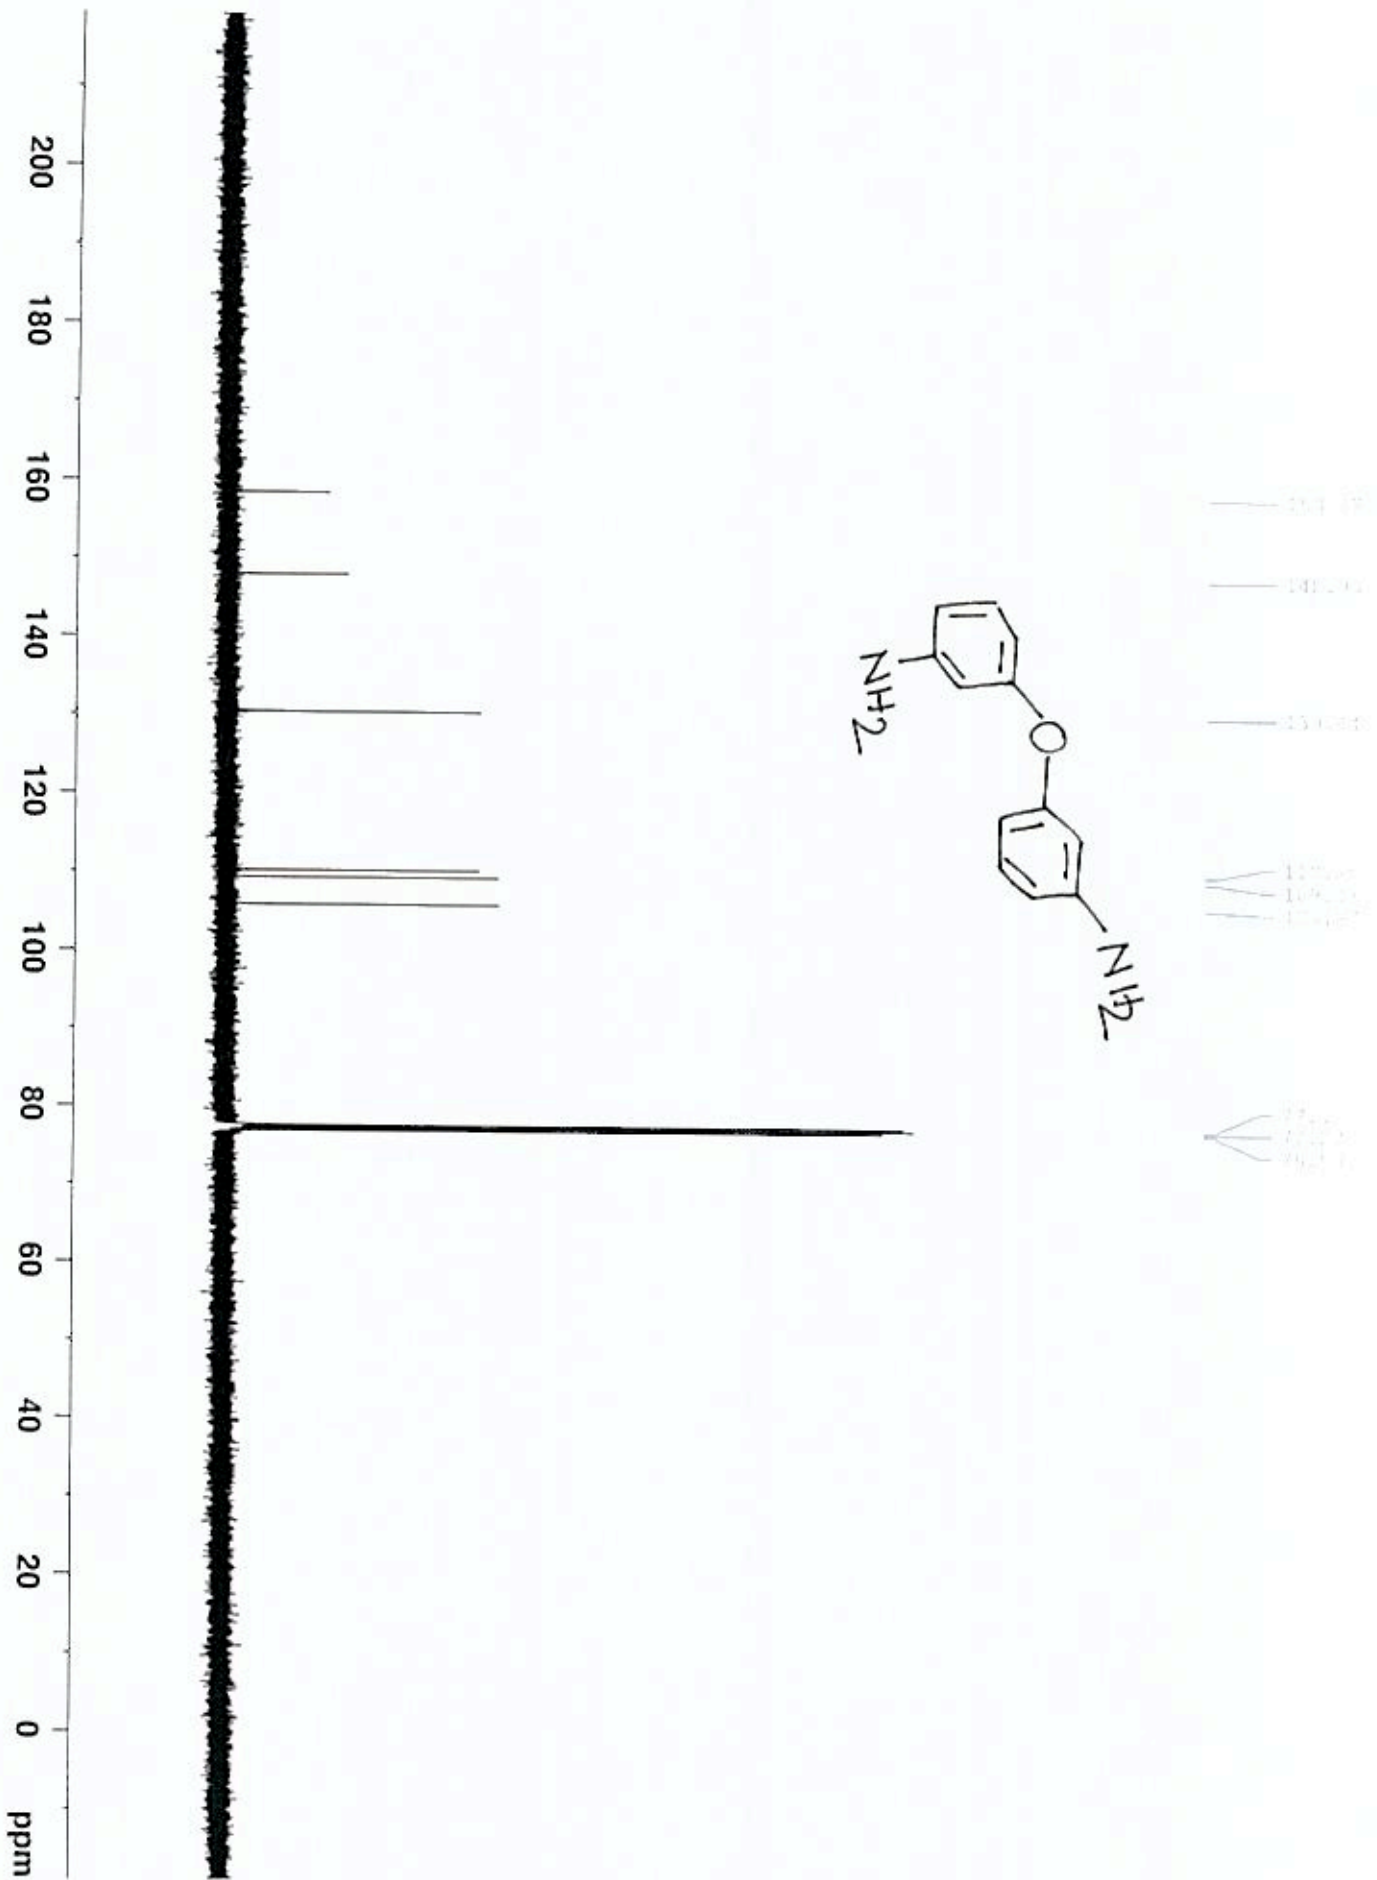

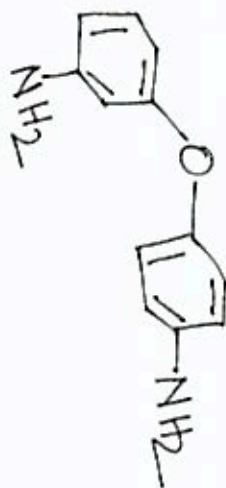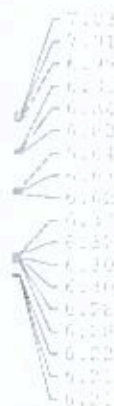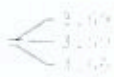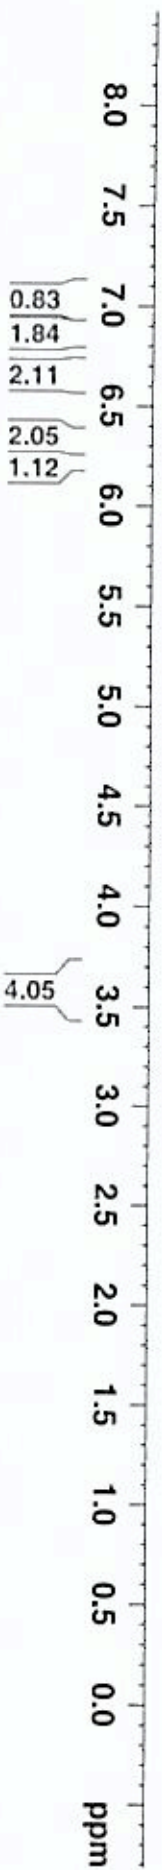

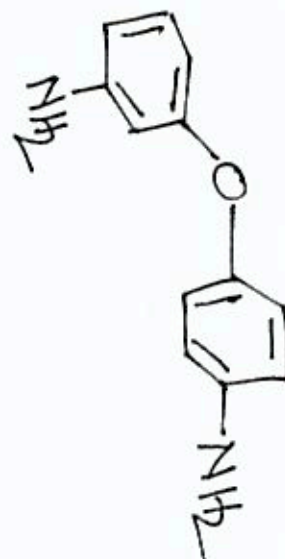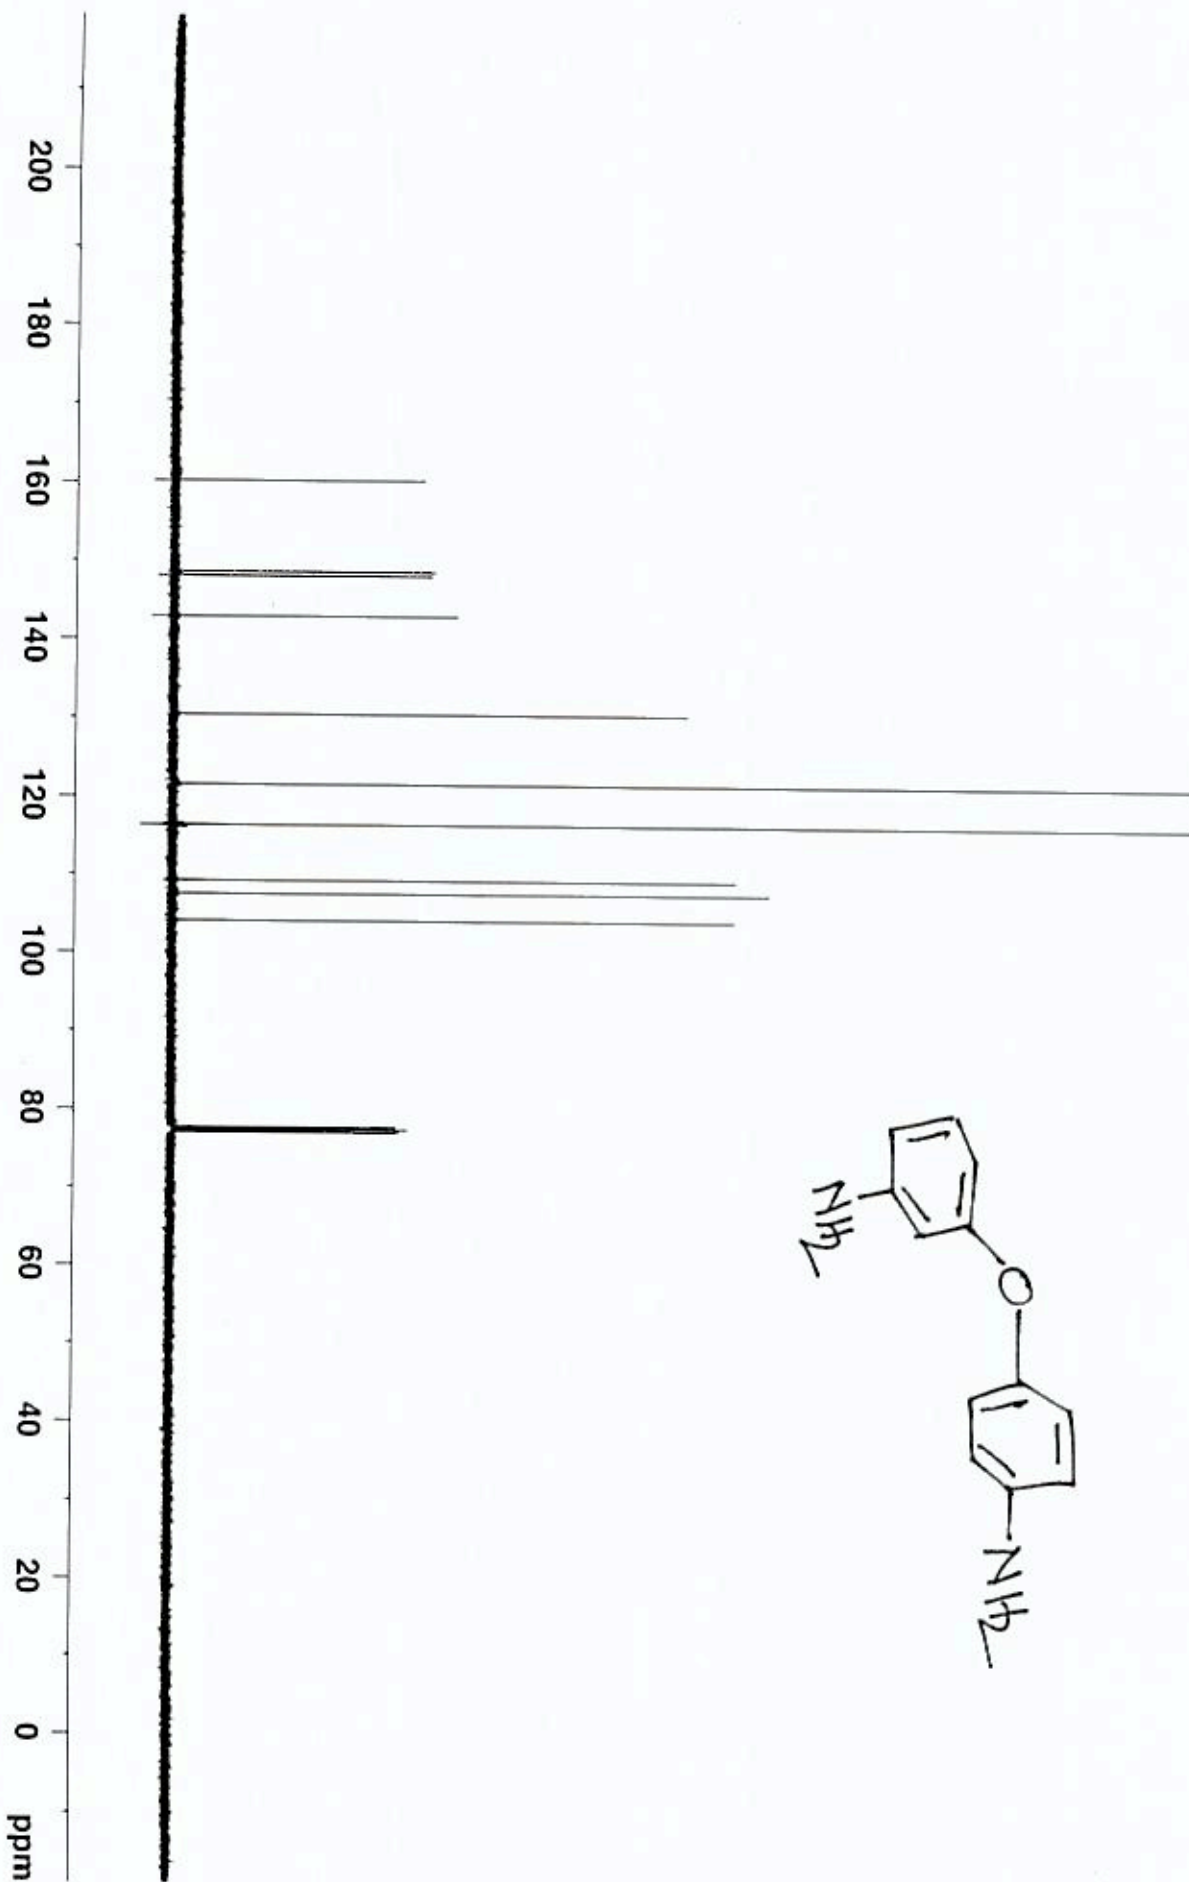

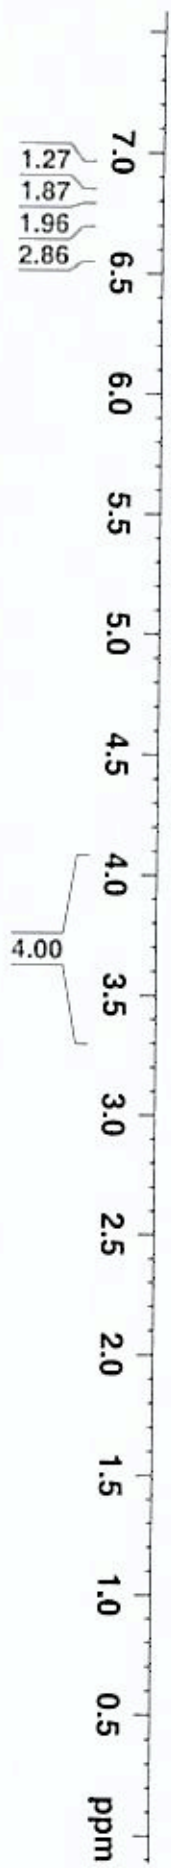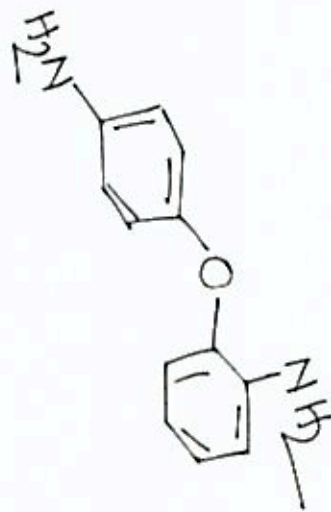

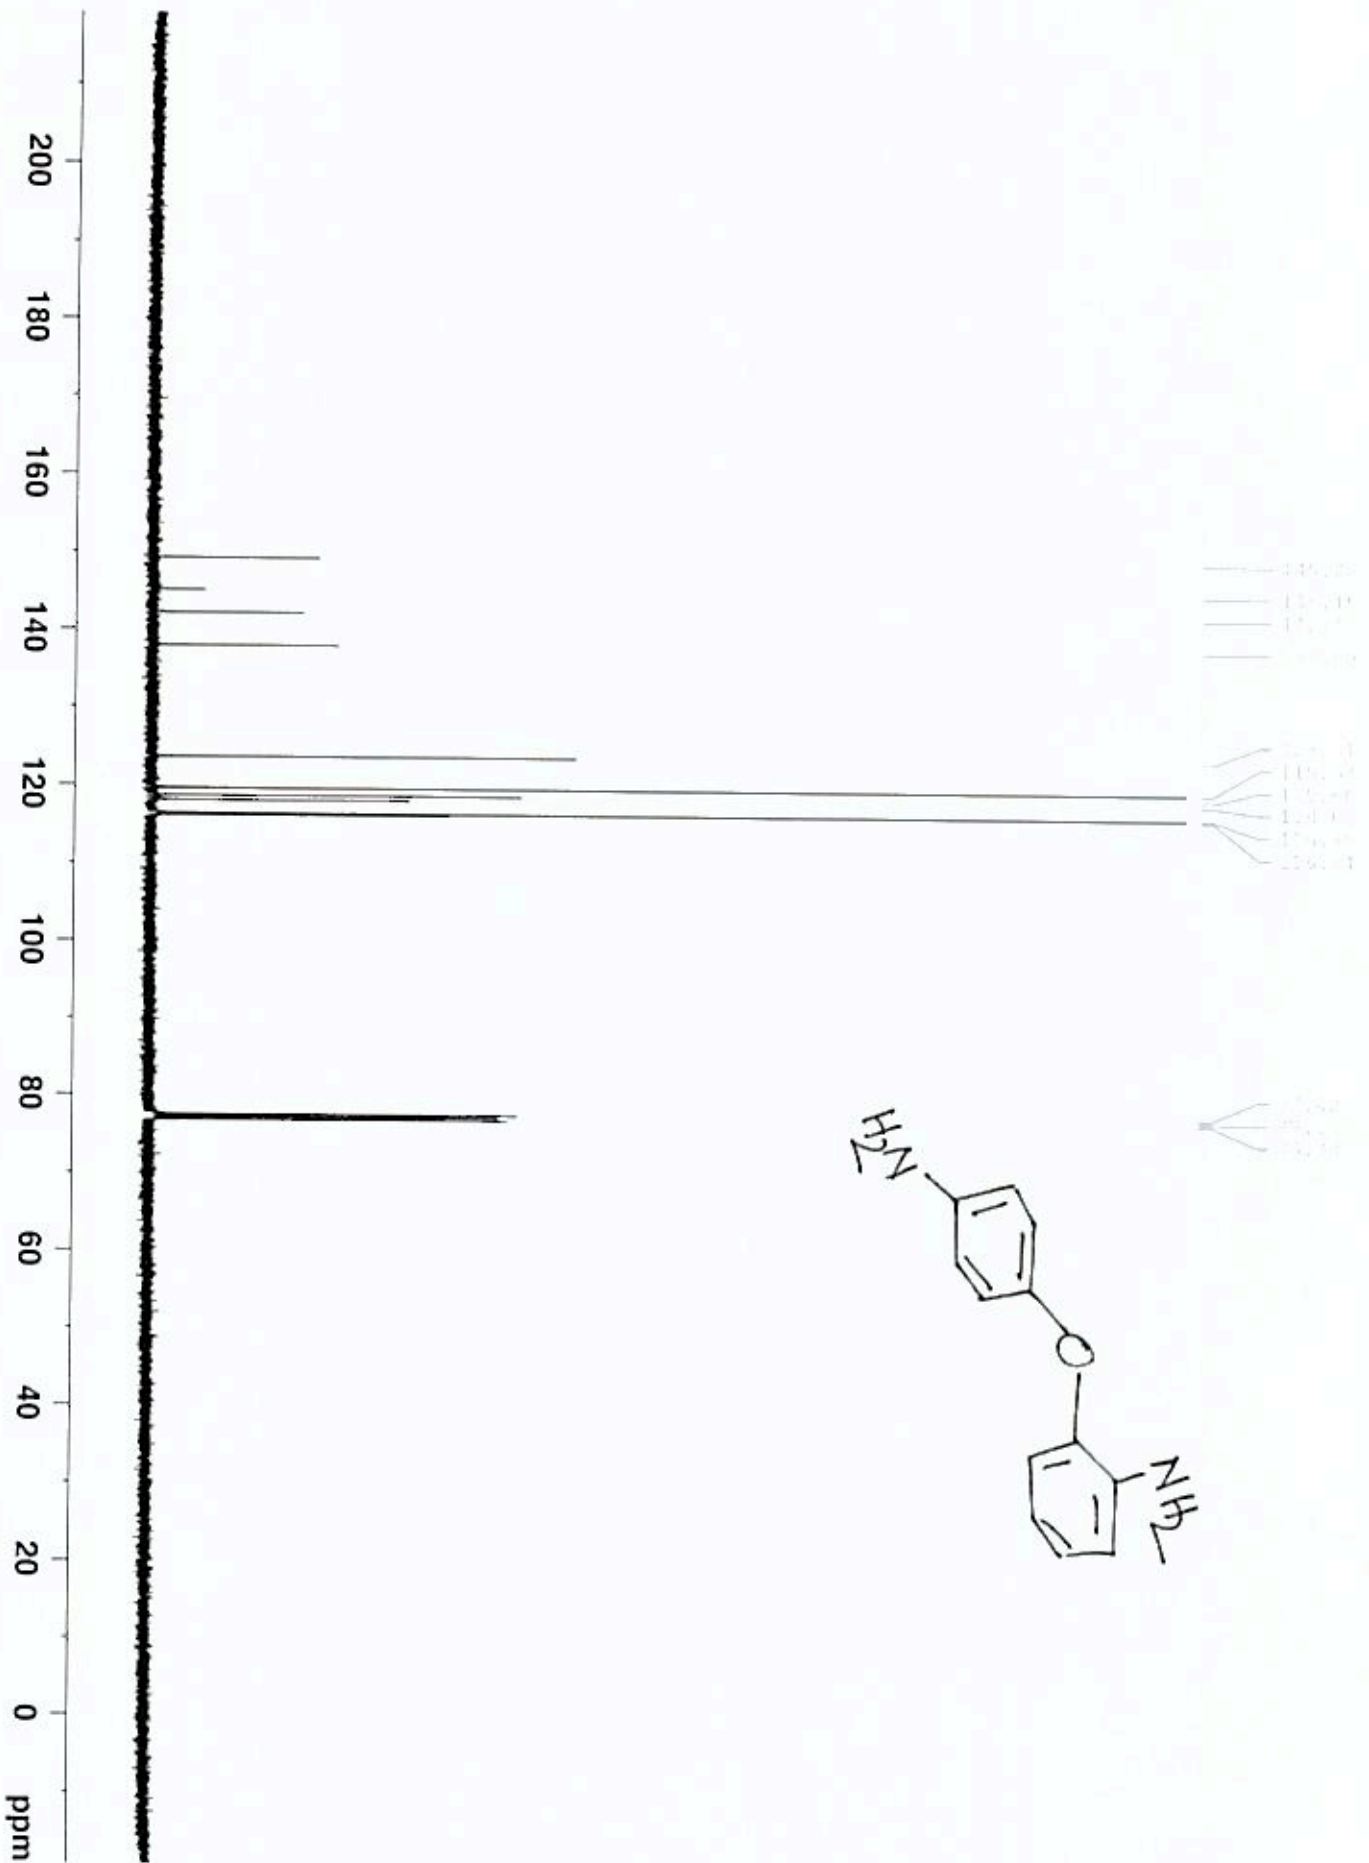

Supplement: NIHMS158545-supplement-2_si_002.pdf [file NIHMS158545-supplement-2_si_002.pdf]
